# Supplementary material
Source: PubMed Central journal article supplement (PMC5477648)
Supplement: NIHMS868601-supplement-SI.pdf [file NIHMS868601-supplement-SI.pdf]

## Table of Contents

|                                                                                             |     |
|---------------------------------------------------------------------------------------------|-----|
| 1. General Information.....                                                                 | 2   |
| 2. General Procedure for Synthesis of Bidentate Templates <b>T1-10</b> .....                | 2   |
| 3. General Procedure for Remote Site-selective C–H Olefination of Substrates <b>1</b> ..... | 3   |
| 4. Optimization of Reaction Conditions .....                                                | 4   |
| 4.1 Screening of the Palladium Salts .....                                                  | 4   |
| 4.2 Screening of the Silver Salts.....                                                      | 5   |
| 4.3 Screening of the Oxidants/Additives .....                                               | 5   |
| 4.4 Screening of the Solvents.....                                                          | 6   |
| 4.5 Screening of the Loading of <b>2a</b> .....                                             | 7   |
| 4.6 Screening of the Concentrations .....                                                   | 7   |
| 4.7 Screening of the Loading of Template, Pd(OAc) <sub>2</sub> and Ligand.....              | 8   |
| 5. Gram-scale Reaction.....                                                                 | 9   |
| 6. General Procedure for Synthesis of Tridentate Templates <b>T11-19</b> .....              | 10  |
| 7. Procedure for Remote Site–selective C–H Olefination of Substrate <b>4</b> .....          | 21  |
| 7.1 General Procedure.....                                                                  | 21  |
| 7.2 Template Recovery .....                                                                 | 21  |
| 7.3 Procedure for Remote Site–selective C–H Olefination of Camptothecin <b>4p</b> .....     | 23  |
| 7.4 Control Experiments .....                                                               | 24  |
| 8. Characterization of Templates, Substrates and Products .....                             | 25  |
| 9. NMR Spectra .....                                                                        | 61  |
| 10. X-Ray Crystallographic Data.....                                                        | 150 |
| 11. References.....                                                                         | 190 |

## 1. General Information

Unless otherwise stated, all reagents were purchased from commercial suppliers and used without further purification. Anhydrous solvents were obtained from the solvent purification system produced by JC Meyer Solvent Systems. Analytical thin layer chromatography (TLC) was performed on Merck Millipore precoated (0.25 mm thickness) silica gel plates with F254 indicator. Visualization was accomplished by irradiation with UV light at 254 nm or PMA or KMnO<sub>4</sub> stain solution. Flash column chromatography was performed on silica gel (32-63 μm) supplied by Dynamic Adsorbents. <sup>1</sup>H NMR spectra were recorded on a Bruker DRX-600 spectrometer (600 MHz) in deuterated solvent and chemical shifts were reported in ppm (δ) relative to tetramethylsilane with the solvent resonance employed as the internal standard (CDCl<sub>3</sub>, δ 7.26 ppm; DMSO-*d*<sub>6</sub>, δ 2.50 ppm; acetonitrile-*d*<sub>3</sub>, δ 1.94 ppm). Data are reported as follows: chemical shift, multiplicity (s = singlet, d = doublet, t = triplet, q = quartet, m = multiplet, br = broad), coupling constants (Hz) and integration. <sup>13</sup>C NMR spectra were recorded on a Bruker DRX-600 spectrometer (151 MHz) in deuterated solvent with complete proton decoupling and chemical shifts are reported in ppm from tetramethylsilane with the solvent resonance as the internal standard (CDCl<sub>3</sub>, δ 77.0 ppm; DMSO-*d*<sub>6</sub>, δ 39.5 ppm; acetonitrile-*d*<sub>3</sub>, δ 1.32 ppm). High-resolution mass spectra (HRMS) were recorded on an Agilent LC/MSD TOF mass spectrometer. The single crystal X-ray diffraction studies were carried out on a Bruker Kappa APEX-II CCD diffractometer equipped with Mo K<sub>α</sub> radiation (λ = 0.71073 Å). The substrates **1b-v** were synthesized according to the literature known procedures<sup>1,2</sup>.

## 2. General Procedure for Synthesis of Bisdentate Templates T1-10

### 2.1 Procedure for Synthesis of T1, T3-7, T9-10

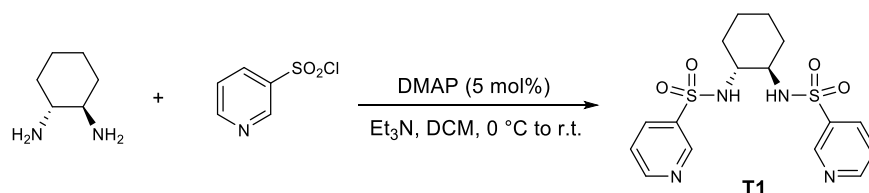

(1*R*, 2*R*)-cyclohexane-1,2-diamine (343 mg, 3.0 mmol) and DMAP (18mg, 0.15 mmol) were placed in a pre-dried 100 mL three-necked flask and flushed with nitrogen. DCM (25 mL) and Et<sub>3</sub>N (1.25 mL, 9.0 mmol) were added into the flask under nitrogen. The reaction solution was

cooled to 0 °C and pyridine-3-sulfonyl chloride (0.75 mL, 6.3 mmol) was added dropwise. The reaction mixture was stirred at 0 °C for 2 hours and warmed to room temperature slowly then stirred overnight. The solvent and volatile compounds were evaporated under reduced pressure at 45 °C. The residue was purified by column chromatography on silica gel using DCM/MeOH (20:1) as the eluent giving the template **T1** in its pure form.

## 2.2 Procedure for Synthesis of T8

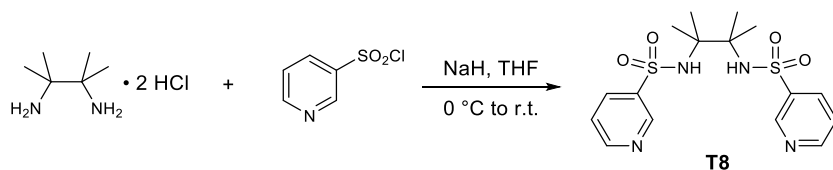

Sodium hydride (1.476g, 36.9 mmol, 60 % dispersion in mineral oil) was placed in a pre-dried 50 mL Schlenk flask under nitrogen. THF (10 mL) was added and the mixture was cooled to 0 °C. 2,3-Dimethyl-2,3-butanediamine dihydrochloride (698 mg, 3.69 mmol) was added into the flask in portions under nitrogen, the mixture was stirred at 0 °C for 0.5 hour then warmed to room temperature and stirred for 0.5 hour. The mixture was cooled to 0 °C and pyridine-3-sulfonyl chloride (1.32 mL, 11.07 mmol) was added dropwise. The reaction mixture was stirred at 0 °C for 2 hours and warmed to room temperature slowly then stirred overnight. 2 N aqueous solution of HCl (11 mL) was added at 0 °C slowly and the mixture was extracted with ethyl acetate (50 mL) and DCM (50 mL) three times respectively. The organic layers were then combined and dried with Na<sub>2</sub>SO<sub>4</sub>. After removal of the solvents, the residue was purified by column chromatography on silica gel using DCM/MeOH (20:1) as the eluent giving the template **T8** in its pure form.

Template **T2**<sup>3</sup>, **T4**<sup>4</sup>, **T5**<sup>5</sup>, **T9**<sup>6</sup> and **T10**<sup>7</sup> have been synthesized and characterized before.

## 3. General Procedure for Remote Site-selective C–H Olefination of Substrates 1

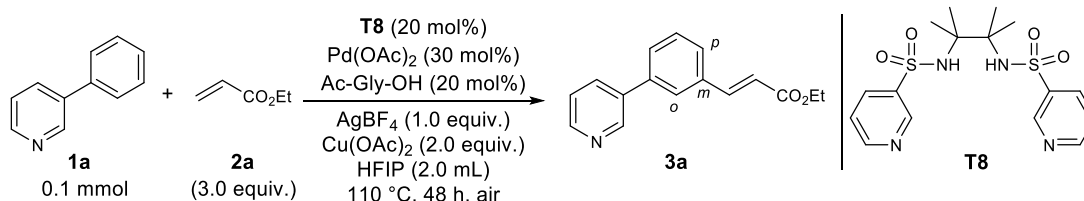

A reaction tube (15 mL) with magnetic stir bar was charged with **1a** (14.3  $\mu$ L, 0.1 mmol), **T8** (8.0 mg, 0.02 mmol), Pd(OAc)<sub>2</sub> (6.7 mg, 0.03 mmol), Ac-Gly-OH (2.3mg, 0.02 mmol), AgBF<sub>4</sub> (19.5 mg, 0.1 mmol), Cu(OAc)<sub>2</sub> (36.3 mg, 0.2 mmol), HFIP (2.0 ml) and **2a** (31.8  $\mu$ l, 0.3 mmol) in air. The reaction tube was sealed and allowed to stir at ambient temperature for 10 minutes, then heated to 110 °C for 48 hours. Upon completion, the reaction mixture was cooled to 0 °C and saturated aqueous solution of sodium sulfide (1.0 mL) was added followed by water (3.0 mL). The mixture was extracted with DCM (10 mL) for three times and the organic layers were combined and filtered through a silica gel plug then dried with Na<sub>2</sub>SO<sub>4</sub>. The solvent and volatile compounds were evaporated under reduced pressure at 45 °C. The crude reaction mixture was purified on preparative TLC using hexanes/ethyl acetate (2:1) as the eluent to afford the desired product **3a**.

*Caution: The operator should have appropriate protection all the time when the reaction is running due to the high pressure generated in the sealed reaction flask under high temperature.*

## 4. Optimization of Reaction Conditions

### 4.1 Screening of the Palladium Salts

**Table S1** Screening of the Palladium Salts

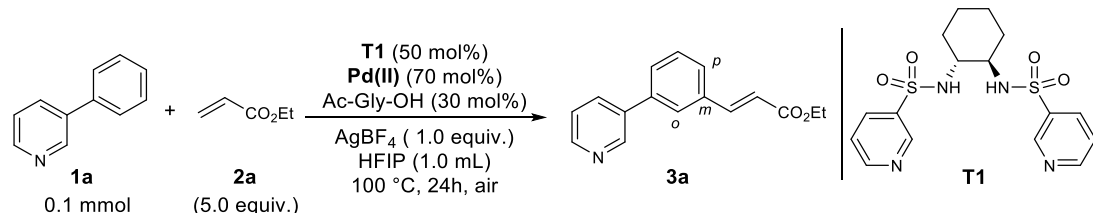

| Entry | Pd(II)                                                              | Yield (%) <sup>a</sup> | <i>m</i> :( <i>o</i> + <i>p</i> ) <sup>a</sup> |
|-------|---------------------------------------------------------------------|------------------------|------------------------------------------------|
| 1     | Pd(CH <sub>3</sub> CN) <sub>2</sub> (BF <sub>4</sub> ) <sub>2</sub> | 2                      | 79:21                                          |
| 2     | Pd(TFA) <sub>2</sub>                                                | 7                      | 73:27                                          |
| 3     | Pd(acac) <sub>2</sub>                                               | 1                      | 60:40                                          |
| 4     | PdSO <sub>4</sub>                                                   | 1                      | 70:30                                          |

|          |                            |           |              |
|----------|----------------------------|-----------|--------------|
| 5        | PdCl <sub>2</sub>          | <1        | N.D.         |
| <b>6</b> | <b>Pd(OAc)<sub>2</sub></b> | <b>49</b> | <b>73:27</b> |

[a] The yield of the olefinated products, the *meta*:(*ortho* + *para*) ratio of mono-olefinated products were determined by <sup>1</sup>H NMR analysis of the unpurified reaction mixture using CH<sub>2</sub>Br<sub>2</sub> as the internal standard (assisted with GC-MS analysis), the variance is estimated to be within 5%. Ac-Gly-OH: *N*-acetyl-glycine.

## 4.2 Screening of the Silver Salts

**Table S2** Screening of the Silver Salts

Reaction conditions: T1 (30 mol%), Pd(OAc)<sub>2</sub> (30 mol%), Ac-Gly-OH (20 mol%), Ag(I) (1.0 equiv.), HFIP (1.0 mL), 100 °C, 24h, air.

| Entry    | Ag(I)                   | Yield (%) <sup>a</sup> | <i>m</i> :( <i>o</i> + <i>p</i> ) <sup>a</sup> |
|----------|-------------------------|------------------------|------------------------------------------------|
| 1        | AgTFA                   | 21                     | 63:37                                          |
| 2        | AgOTf                   | 29                     | 63:37                                          |
| 3        | AgF                     | 4                      | 63:37                                          |
| 4        | AgPF <sub>6</sub>       | 14                     | 71:29                                          |
| 5        | AgSbF <sub>6</sub>      | 23                     | 66:34                                          |
| <b>6</b> | <b>AgBF<sub>4</sub></b> | <b>32</b>              | <b>72:28</b>                                   |

[a] The yield of the olefinated products, the *meta*:(*ortho* + *para*) ratio of mono-olefinated products were determined by <sup>1</sup>H NMR analysis of the unpurified reaction mixture using CH<sub>2</sub>Br<sub>2</sub> as the internal standard (assisted with GC-MS analysis), the variance is estimated to be within 5%. Ac-Gly-OH: *N*-acetyl-glycine.

## 4.3 Screening of the Oxidants/Additives

**Table S3** Screening of the Oxidants/Additives

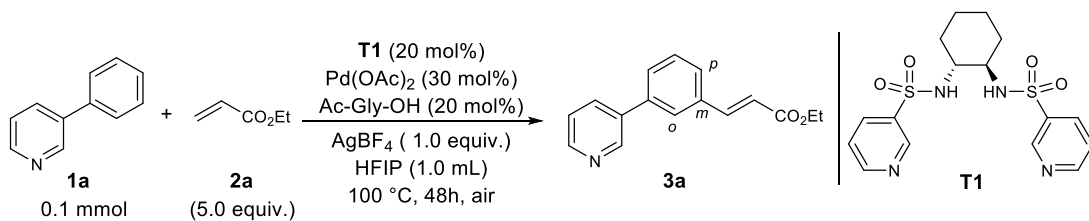

| Entry     | Additive (2.0 equiv. of Cu)                           | Yield (%) <sup>a</sup> | <i>m</i> :( <i>o</i> + <i>p</i> ) <sup>a</sup> |
|-----------|-------------------------------------------------------|------------------------|------------------------------------------------|
| 1         | Cu(OTf) <sub>2</sub>                                  | 0                      | N.D.                                           |
| 2         | Cu(TFA) <sub>2</sub> ·xH <sub>2</sub> O               | 0                      | N.D.                                           |
| 3         | Cu <sub>3</sub> (PO <sub>4</sub> ) <sub>2</sub>       | 33                     | 84:16                                          |
| 4         | CuCl <sub>2</sub>                                     | 0                      | N.D.                                           |
| 5         | CuF <sub>2</sub>                                      | 45                     | 85:15                                          |
| 6         | CuO                                                   | 34                     | 81:19                                          |
| 7         | Cu(NO <sub>3</sub> ) <sub>2</sub> ·3H <sub>2</sub> O  | 0                      | N.D.                                           |
| 8         | Cu(ClO <sub>4</sub> ) <sub>2</sub> ·6H <sub>2</sub> O | 0                      | N.D.                                           |
| 9         | Cu(TCA) <sub>2</sub>                                  | 0                      | N.D.                                           |
| <b>10</b> | <b>Cu(OAc)<sub>2</sub></b>                            | <b>53</b>              | <b>85:15</b>                                   |

[a] The yield of the olefinated products, the *meta*:(*ortho* + *para*) ratio of mono-olefinated products were determined by <sup>1</sup>H NMR analysis of the unpurified reaction mixture using CH<sub>2</sub>Br<sub>2</sub> as the internal standard (assisted with GC-MS analysis), the variance is estimated to be within 5%.

#### 4.4 Screening of the Solvents

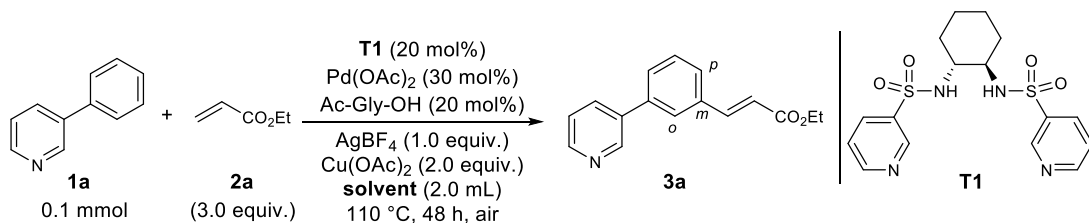

HFIP: 75%,  $m:(o+p) = 89:11$ , mono:di = 87:13.

When *t*-Amyl-OH, Dioxane, DMSO, MeOH, DMF, EtOAc, MeCN, THF, TBME or DME was used as solvent, no desired product was observed.

When DCE or Toluene was used as solvent, only trace amount of desired product was observed.

#### 4.5 Screening of the Loading of 2a

**Table S4** Screening of the loading of 2a

| Entry    | 2a (equiv.) | Yield (%) <sup>a</sup> | $m:(o+p)$ <sup>a</sup> |
|----------|-------------|------------------------|------------------------|
| 1        | 5.0         | 60                     | 94.4:5.6               |
| 2        | 4.0         | 66                     | 94.0:6.0               |
| <b>3</b> | <b>3.0</b>  | <b>75</b>              | <b>94.3:5.7</b>        |
| 4        | 2.0         | 70                     | 93.8:6.2               |

[a] The yield of the olefinated products, the *meta*:(*ortho* + *para*) ratio of mono-olefinated products were determined by <sup>1</sup>H NMR analysis of the unpurified reaction mixture using CH<sub>2</sub>Br<sub>2</sub> as the internal standard (assisted with GC-MS analysis), the variance is estimated to be within 5%.

#### 4.6 Screening of the Concentrations

**Table S5** Screening of the Concentrations

| Entry    | HFIP (mL)  | Concentration (M) | Yield (%) <sup>a</sup> | <i>m</i> :( <i>o</i> + <i>p</i> ) <sup>a</sup> |
|----------|------------|-------------------|------------------------|------------------------------------------------|
| 1        | 1.0        | 0.100             | 75                     | 94:6                                           |
| <b>2</b> | <b>2.0</b> | <b>0.050</b>      | <b>77</b>              | <b>95:5</b>                                    |
| 3        | 3.0        | 0.033             | 69                     | 95:5                                           |
| 4        | 4.0        | 0.025             | 57                     | 94:6                                           |
| 5        | 5.0        | 0.020             | 51                     | 93:7                                           |

[a] The yield of the olefinated products, the *meta*:(*ortho* + *para*) ratio of mono-olefinated products were determined by <sup>1</sup>H NMR analysis of the unpurified reaction mixture using CH<sub>2</sub>Br<sub>2</sub> as the internal standard (assisted with GC-MS analysis), the variance is estimated to be within 5%.

#### 4.7 Screening of the Loading of Template, Pd(OAc)<sub>2</sub> and Ligand

**Table S6** Screening of the Loading of Template, Pd(OAc)<sub>2</sub> and Ligand

| Entry | T8 (mol%) | Pd(OAc) <sub>2</sub> (mol%) | Ac-Gly-OH (mol%) | Yield (%) <sup>a</sup> | <i>m</i> :( <i>o</i> + <i>p</i> ) <sup>a</sup> |
|-------|-----------|-----------------------------|------------------|------------------------|------------------------------------------------|
| 1     | 10        | 15                          | 10               | 14                     | 89:11                                          |
| 2     | 10        | 15                          | 15               | 25                     | 90:10                                          |
| 3     | 10        | 20                          | 5                | 62                     | 94:6                                           |



|          |           |           |           |           |             |
|----------|-----------|-----------|-----------|-----------|-------------|
| 4        | 10        | 20        | 10        | 60        | 94:6        |
| 5        | 10        | 20        | 15        | 40        | 92:8        |
| <b>6</b> | <b>15</b> | <b>20</b> | <b>5</b>  | <b>64</b> | <b>95:5</b> |
| 7        | 15        | 30        | 15        | 65        | 95:5        |
| 8        | 20        | 30        | 10        | 76        | 95:5        |
| <b>9</b> | <b>20</b> | <b>30</b> | <b>20</b> | <b>77</b> | <b>95:5</b> |

[a] The yield of the olefinated products, the *meta*:(*ortho* + *para*) ratio of mono-olefinated products were determined by <sup>1</sup>H NMR analysis of the unpurified reaction mixture using CH<sub>2</sub>Br<sub>2</sub> as the internal standard (assisted with GC-MS analysis), the variance is estimated to be within 5%.

## 5. Gram-scale Reaction

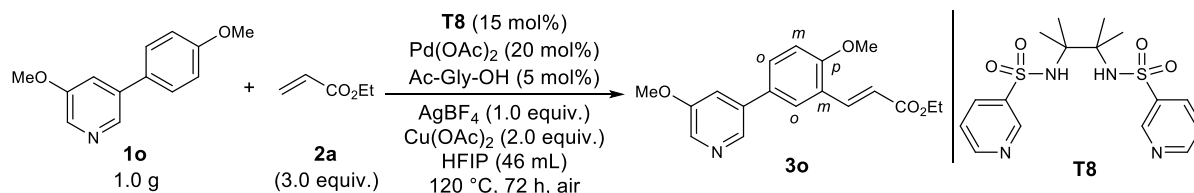

A reaction tube (250 mL) with magnetic stir bar was charged with **1o** (1.0 g, 4.646 mmol), **T8** (277 mg, 0.697 mmol), Pd(OAc)<sub>2</sub> (209 mg, 0.929 mmol), Ac-Gly-OH (27 mg, 0.232 mmol), AgBF<sub>4</sub> (0.904 g, 4.646 mmol), Cu(OAc)<sub>2</sub> (1.688 g, 9.292 mmol), HFIP (46 ml) and **2a** (1.48 mL, 13.937 mmol) in air. The reaction tube was sealed and allowed to stir at ambient temperature for 10 minutes, then heated to 120 °C for 72 hours. Upon completion, the reaction mixture was cooled to 0 °C and saturated aqueous solution of sodium sulfide (10 mL) was added followed by water (30 mL) and DCM (30 mL). The mixture was filtered through a pad of celite and washed with DCM. The solvents were evaporated under reduced pressure at 45 °C and then the mixture was extracted with DCM (100 mL) for three times. After dried with Na<sub>2</sub>SO<sub>4</sub>, the solvent and volatile compounds were evaporated under reduced pressure at 45 °C. A sample (10 mg) was taken from the unpurified reaction mixture and the *m:o* ratio of mono-olefinated products was determined to be 99:1 and the mono:di ratio was determined to be 98:2 by <sup>1</sup>H NMR analysis. The rest crude reaction mixture and the sample for <sup>1</sup>H NMR analysis were combined and purified by

column chromatography on silica gel using hexane/ethyl acetate (5:1 to 2:1) then DCM/MeOH (10:1) as the eluents giving **3o** (1.03 g, 70% yield) and **T8** (266 mg, 96% recovered).

*Caution: The operator should have appropriate protection all the time when the reaction is running due to the high pressure generated in the sealed reaction flask under high temperature.*

## 6. General Procedure for Synthesis of Tridentate Templates T11-19

### Scheme S1 Synthesis of **4k**

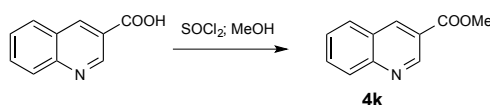

Quinoline-3-carboxylic acid (0.245 g, 1.41 mmol) was charged in the flask with stir bar and thionyl chloride was added. The resulting mixture was allowed to stir at 80 °C overnight. Upon completion, the reaction mixture was cooled to room temperature and concentrated *in vacuo*. MeOH was added to this crude mixture and was heated under reflux for 8 h. Upon completion, the reaction mixture was cooled to room temperature, diluted with DCM, and was washed with saturated aqueous NaHCO<sub>3</sub>. The aqueous layer was extracted with DCM twice, and the combined organic layers were dried with anhydrous Na<sub>2</sub>SO<sub>4</sub>. After removal of the solvents, the residue was purified by column chromatography on silica gel using EtOAc/ hexanes (1: 6) as the eluent to give **4k** (0.161 g, 61%). <sup>1</sup>H NMR (600 MHz, CDCl<sub>3</sub>): δ 9.46 (d, *J* = 2.1 Hz, 1H), 8.86 (d, *J* = 2.2 Hz, 1H), 8.17 (d, *J* = 8.5 Hz, 1H), 7.95 (d, *J* = 8.2 Hz, 1H), 7.84 (ddd, *J* = 8.5, 6.9, 1.4 Hz, 1H), 7.63 (ddd, *J* = 8.1, 6.9, 1.2 Hz, 1H), 4.03 (s, 3H). <sup>1</sup>H NMR matches previously reported data<sup>8</sup>.

### Scheme S2 Synthesis of **4l**

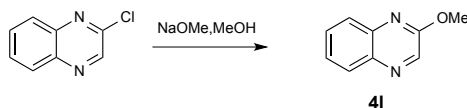

2-Chloroquinoline (0.823g, 5 mmol) and NaOMe (1.89g, 35 mmol) were charged in the flask with stir bar and MeOH (10 mL) was added to this mixture. The resulting solution was heated at 80 °C for 4 h. Upon completion, the reaction mixture was cooled to room temperature and filtered through celite (the celite pad was washed with EtOAc). The filtrate was concentrated *in*

*vacuo*. Water was added to this crude mixture and extracted with EtOAc three times. The combined organic layers were dried with anhydrous Na<sub>2</sub>SO<sub>4</sub>. After removal of the solvents, the residue was purified by column chromatography on silica gel using EtOAc/hexanes as the eluent giving pure product. <sup>1</sup>H NMR (600 MHz, CDCl<sub>3</sub>): δ 8.47 (s, 1H), 8.02 (dd, *J* = 8.2, 1.5 Hz, 1H), 7.85 (dd, *J* = 8.3, 1.4 Hz, 1H), 7.67 (ddd, *J* = 8.4, 7.0, 1.5 Hz, 1H), 7.56 (ddd, *J* = 8.3, 7.0, 1.4 Hz, 1H), 4.10 (s, 3H); <sup>13</sup>C NMR (151 MHz, CDCl<sub>3</sub>): δ 157.67, 140.38, 139.59, 138.87, 130.09, 128.98, 127.18, 126.51, 53.69. <sup>1</sup>H NMR, <sup>13</sup>C NMR matches previously reported data<sup>9</sup>.

### Scheme S3 Synthesis of S3

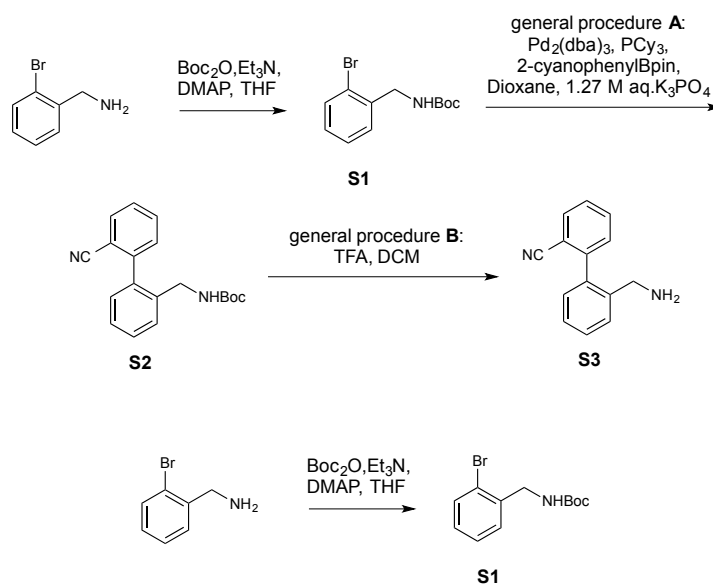

To a solution of the 2-bromobenzylamine (0.63 mL, 5.0 mmol) in THF (25 mL) at 0 °C was added Et<sub>3</sub>N (4.18 mL, 30 mmol), followed by DMAP (0.01 g, 0.08 mmol). To the reaction mixture was added di-*tert*-butyl dicarbonate (1.31 g, 6.0 mmol) and the solution was warmed to room temperature and stirred for 5 h. Upon completion, the reaction was quenched with cold water and extracted with EtOAc three times. The combined organic layers were washed with water and brine, dried with anhydrous Na<sub>2</sub>SO<sub>4</sub>, and concentrated. The residue was purified by column chromatography on silica gel using EtOAc/hexanes (1: 10) as the eluent giving the pure product. <sup>1</sup>H NMR (400 MHz, CDCl<sub>3</sub>): δ 7.54 (dd, *J* = 8.0, 1.3 Hz, 1H), 7.38 (d, *J* = 7.7 Hz, 1H), 7.29 (d, *J* = 7.4, 1.2 Hz, 1H), 7.14 (dd, *J* = 7.8, 1.8 Hz, 1H), 5.01 (br, 1H), 4.39 (d, *J* = 6.3 Hz, 2H), 1.45 (s, 9H). <sup>1</sup>H NMR matches previously reported data<sup>10</sup>.

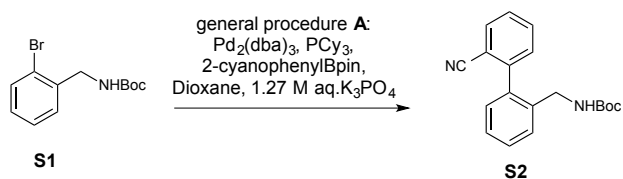

(General procedure A: Suzuki–Miyaura cross coupling)

2-cyanophenylboronic acid pinacol ester (0.504 g, 2.2 mmol), Pd<sub>2</sub>(dba)<sub>3</sub> (0.0366g, 0.04 mmol), PCy<sub>3</sub> (0.0269 g, 0.096 mmol), and **S1** (0.572 g, 2 mmol) were added to a Schlenk flask equipped with a stir bar. After dioxane (5.4 mL) and 1.27 M K<sub>3</sub>PO<sub>4</sub> aqueous solution (2.7 mL) were added, the flask was evacuated and refilled with nitrogen three times. The Schlenk flask was sealed and the resulting reaction mixture was stirred at 100 °C overnight. Upon completion, the reaction mixture was cooled to room temperature and filtered through celite (the celite pad was washed thoroughly with EtOAc). Water was added to this mixture and extracted three times with EtOAc. The combined organic layers were dried with anhydrous Na<sub>2</sub>SO<sub>4</sub>. After removal of the solvents, the residue was purified by column chromatography on silica gel using EtOAc/hexanes (1:6) as the eluent giving pure product.

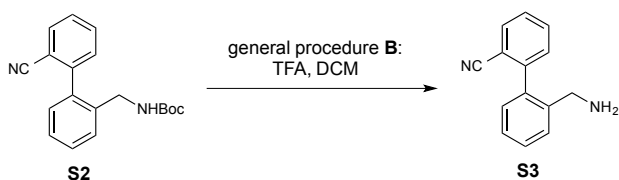

(General Procedure B: Deprotection of Boc protecting group)

To a solution of the **S2** (0.64 g, 2 mmol) in DCM (32 mL) at 0 °C was added TFA (3 mL) slowly. The solution was warmed to room temperature and stirred for 2 hours. Upon completion, the reaction was quenched with saturated aqueous NaHCO<sub>3</sub> and the organic layer was separated. Water layer was extracted with DCM three times and the combined organic layers were dried with anhydrous Na<sub>2</sub>SO<sub>4</sub>, and concentrated to give the crude amine **S3**, which was used in the next step without further purification.

#### Scheme S4 Synthesis of S4

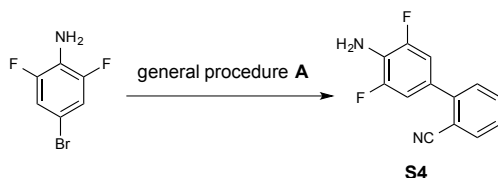

**S4** was synthesized using general procedure **A** and was purified by column chromatography on silica gel using EtOAc/hexanes (1:10) as the eluent.

### Scheme S5 Synthesis of **S5** and **S6**

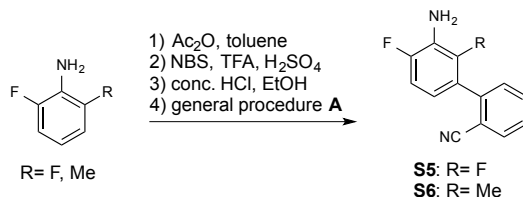

For **S5** (R = F)

To a solution of 2,6-difluoroaniline (1.0 mL, 10 mmol) in toluene (20 mL) was added acetic anhydride (1.13 mL, 12 mmol) in one portion. The reaction mixture was allowed to stir overnight at 110 °C. Upon completion, the solvent was removed under reduced pressure. Water was added to this crude mixture and extracted with EtOAc three times. The combined organic layers were washed with brine and dried with anhydrous Na<sub>2</sub>SO<sub>4</sub>. The solvent was removed to afford *N*-(2,6-difluorophenyl)acetamide, which was used in the next step without further purification.

To a solution of *N*-(2,6-difluorophenyl)acetamide in TFA (8.2 mL) and H<sub>2</sub>SO<sub>4</sub> (11 mL) at 0 °C was added NBS (1.72 g, 9.7 mmol) in portions. The reaction mixture was stirred at 0 °C for 10 min and warmed to room temperature slowly then stirred overnight. Upon completion, ice was added to the reaction mixture and the white precipitate was collected by filtration. The crude product was washed with water and hexane extensively to give *N*-(3-bromo-2,6-difluorophenyl)acetamide, which was used in the next step without further purification.

To a solution of *N*-(3-bromo-2,6-difluorophenyl)acetamide in EtOH (5.7 mL) was added concentrated HCl (5.7 mL) at room temperature. The reaction mixture was allowed to stir overnight at 75 °C. Upon completion, the reaction mixture was cooled to room temperature. The reaction mixture was cooled to 0 °C and basified with aqueous NaOH solution. The reaction mixture was extracted three times with EtOAc. The combined organic layers were dried with anhydrous Na<sub>2</sub>SO<sub>4</sub> and concentrated *in vacuo* to give 3-bromo-2,6-difluoroaniline, which was used in the next step without further purification.

3-bromo-2,6-difluoroaniline was converted to **S5** using general procedure **A** and was purified by column chromatography on silica gel using EtOAc/hexanes as the eluent.

**S6** was synthesized using the same procedure as **S5**.

### Scheme S6 Synthesis of **S10** and **S11**

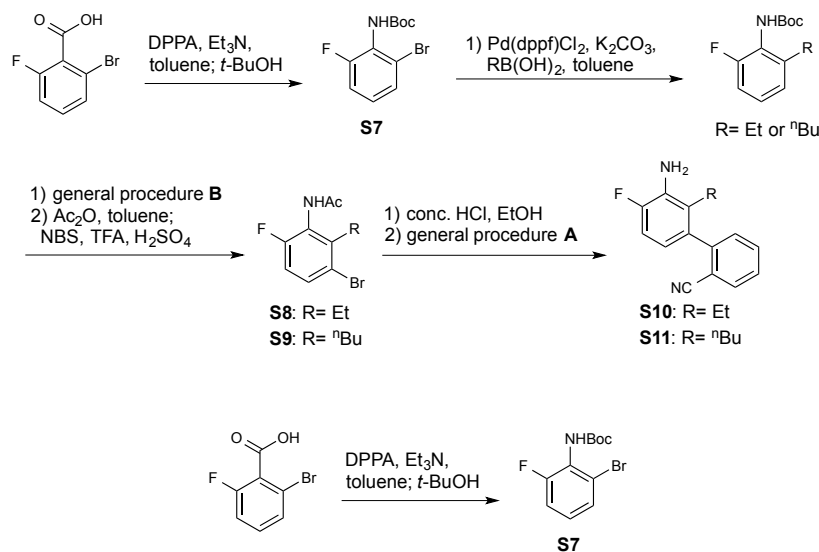

To a solution of the 2-bromo-6-fluorobenzoic acid (2.19 g, 10 mmol) in toluene (40 mL) at room temperature was added Et<sub>3</sub>N (1.46 mL, 10.5 mmol), followed by DPPA (2.26 mL, 10.5 mL). The reaction mixture was gradually heated to 70 °C and stirred at the same temperature until bubbling stops. The solution was heated to 110 °C. After 1 h, to the reaction mixture was added <sup>t</sup>BuOH (7.4 g) and the solution was allowed to stir overnight at the same temperature. Upon completion, the reaction was cooled down to room temperature. Water was added and extracted with EtOAc three times. The combined organic layers were washed with 0.1 M HCl, water, saturated aqueous NaHCO<sub>3</sub>, and brine, dried with anhydrous Na<sub>2</sub>SO<sub>4</sub>, and concentrated. The residue was purified by column chromatography on silica gel using EtOAc/hexanes (1:20 to 1:10) as the eluent to give **S7** (1.69 g, 58%). <sup>1</sup>H NMR (600 MHz, CDCl<sub>3</sub>): δ 7.39–7.35 (m, 1H), 7.10–7.06 (m, 2H), 6.07 (br, 1H), 1.50 (s, 9H). <sup>1</sup>H NMR matches previously reported data<sup>11</sup>.

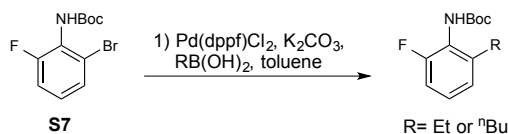

For **S8** (R= Et)

In the air, ethylboronic acid (3.69 g, 49.8 mmol), Pd(dppf)Cl<sub>2</sub> (0.91 g, 1.25 mmol), K<sub>2</sub>CO<sub>3</sub> (10.3 g, 74.7 mmol), and **S7** (7.23 g, 24.9 mmol) were added to a Schlenk flask equipped with a stir bar. After toluene was added, the flask was evacuated and refilled with nitrogen three times. The schlenk flask was sealed and the resulting reaction mixture was stirred at 110 °C overnight. Upon completion, the reaction mixture was cooled to room temperature and filtered through celite (the celite pad was washed thoroughly with EtOAc). The filtrate was concentrated under reduced pressure, and the crude mixture was diluted with DCM, washed with brine, dried over anhydrous Na<sub>2</sub>SO<sub>4</sub>, filtered, and concentrated under reduced pressure. The mixture was passed through a pad of silica gel using EtOAc/hexanes (1:10) as the eluent to give *tert*-butyl (2-ethyl-6-fluorophenyl)carbamate, which was used in the next step without further purification.

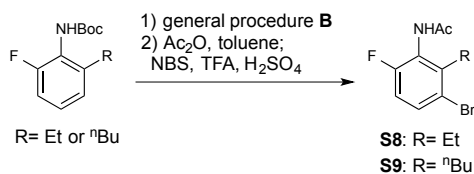

*Tert*-butyl (2-ethyl-6-fluorophenyl)carbamate was converted to 2-ethyl-6-fluoroaniline using general procedure **B**.

To a solution of 2-ethyl-6-fluoroaniline in toluene was added acetic anhydride (1.3 mL, 13.7 mmol) in one portion. The reaction mixture was allowed to stir overnight at 110 °C. Upon completion, the solvent was removed under reduced pressure. To this crude residue was added TFA (12.1 mL) and H<sub>2</sub>SO<sub>4</sub> (16.3 mL). The reaction mixture was cooled to 0 °C and NBS (2.44 g, 13.7 mmol) was added in portions. The reaction mixture was stirred at 0 °C for 10 min and warmed to room temperature slowly then stirred overnight. Upon completion, ice was added to the reaction mixture and the white precipitate was collected by filtration. The crude product was washed with water and hexane extensively, followed by recrystallization from hot MeOH to give **S8** (1.55 g, 44%).

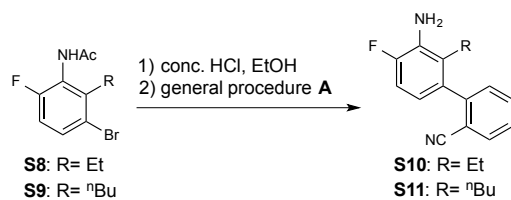

To a solution of **S8** (1.43 g, 5.48 mmol) in EtOH (3.7 mL) was added concentrated HCl (3.7 mL) at room temperature. The reaction mixture was allowed to stir overnight at 75 °C. Upon completion, the reaction mixture was cooled to room temperature. The reaction mixture was cooled to 0 °C and basified with aqueous NaOH solution. The reaction mixture was extracted three times with EtOAc. The combined organic layers were dried with anhydrous Na<sub>2</sub>SO<sub>4</sub> and concentrated *in vacuo* to give the crude product. This product was used in the next step without further purification.

3-bromo-2-ethyl-6-fluoroaniline was converted to **S10** using general procedure **A** and was purified by column chromatography on silica gel using EtOAc/hexanes (1:10) as the eluent.

**S11** was synthesized from **S9** in the same manner as **S10**.

### Scheme S7 Synthesis of **S14**

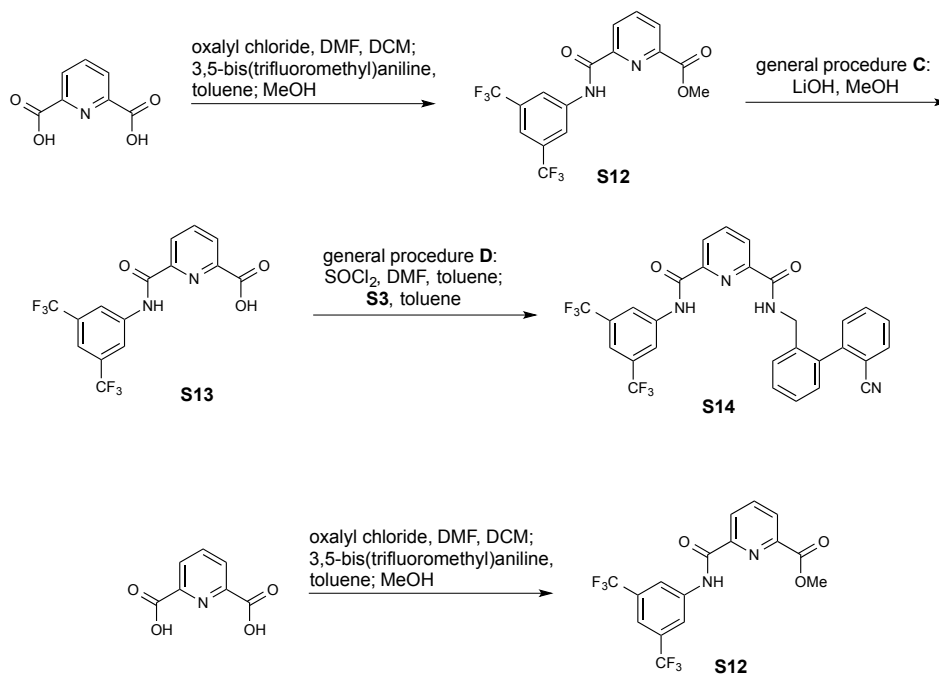



To a solution of 2,6-pyridinedicarboxylic acid (3.34 g, 20 mmol) in DCM (60 mL) was added oxalyl chloride (4 mL, 47.3 mmol) dropwise at room temperature. DMF (3 drops) was added and the reaction mixture was stirred for 10 h. Upon completion, the reaction mixture was concentrated under reduced pressure. Next, toluene (300 mL) and 3,5-bis(trifluoromethyl) aniline (2.5 mL, 16 mmol) were added to the reaction flask and submerged into an oil bath preheated to 70 °C. Then, the oil bath was heated to 120 °C and the reaction mixture was allowed to stir overnight. Upon completion, the reaction mixture was cooled to room temperature and concentrated under reduced pressure. MeOH (60 mL) was added to the reaction flask and heated under reflux for 9 h. Upon completion, the reaction mixture was cooled to room temperature. The white precipitate was collected by filtration and recrystallized from hot MeOH to give **S12** (1.93 g, 25%).

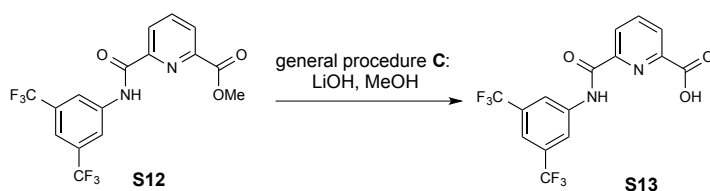

(General Procedure C: Deprotection of methyl ester)

To a solution of **S12** (1.84 g, 4.69 mmol) in MeOH (55 mL) was added LiOH monohydrate (0.39 g, 9.4 mmol) in portions. Upon completion, the solvent was removed *in vacuo*. The crude residue was dissolved in water and acidified by 6 M HCl, extracted with EtOAc three times, dried with anhydrous Na<sub>2</sub>SO<sub>4</sub>, and concentrated. The crude product was used in the next step without further purification.

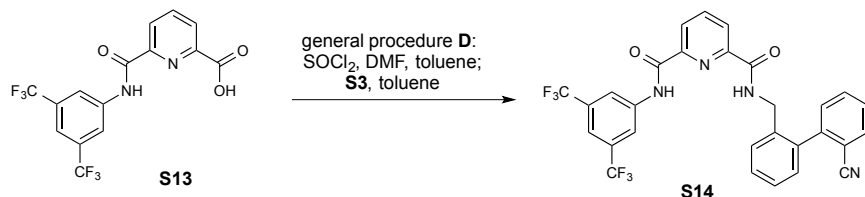

(General Procedure D: Amide formation)

To a solution of **S13** (1.0 equiv.) in toluene was added thionyl chloride (2.5 equiv.) dropwise at room temperature. DMF (3 drops) was added and the reaction mixture was stirred at 80 °C. Upon

completion, the reaction mixture was concentrated under reduced pressure. Next, toluene and **S3** were added to the reaction flask and submerged into an oil bath pre-heated to 80 °C. Then, the oil bath was heated to 120 °C and the reaction mixture was allowed to stir overnight. Upon completion, the reaction mixture was cooled to room temperature and concentrated under reduced pressure. Pure product was isolated by recrystallization from hot MeOH. **S15-S19** were synthesized following the same procedure as **S14**. **S18** and **S19** were recrystallized from hot MeOH. **S16** was purified by column chromatography on silica gel using EtOAc/hexanes as the eluent. **S15** and **S17** were purified by trituration with DCM, MeOH, and Acetone.

### Scheme S8 Synthesis of **S22**

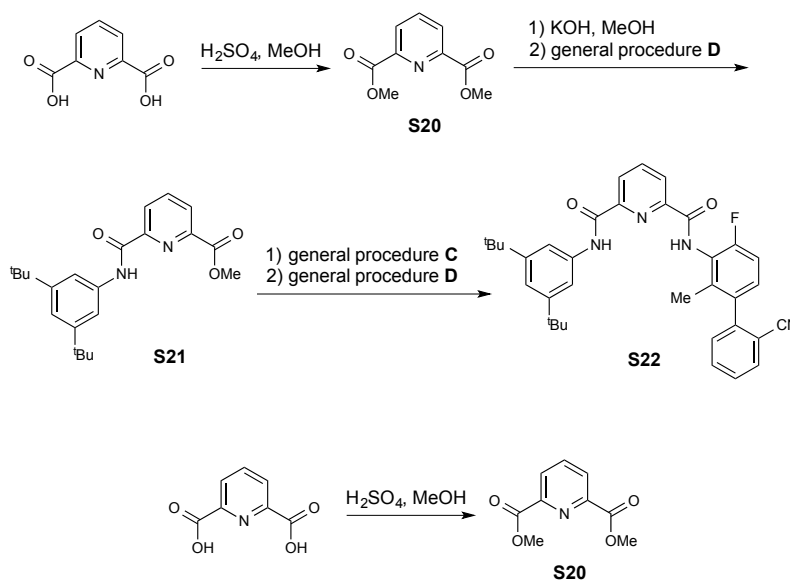

To a solution of 2,6-pyridinedicarboxylic acid (1.67g, 10 mmol) in MeOH (57 mL) was added  $\text{H}_2\text{SO}_4$  (0.19 mL) slowly at room temperature. The resulting mixture was allowed to stir at 90 °C overnight. Upon completion, solvent was removed *in vacuo*. To this residue was added DCM and saturated aqueous  $\text{NaHCO}_3$ . Water layer was extracted with DCM three times. The combined organic layers were dried with anhydrous  $\text{Na}_2\text{SO}_4$ , and concentrated. Recrystallization from hot MeOH gave **S20** (1.49 g, 76%) as colorless crystals.  $^1\text{H}$  NMR (600 MHz,  $\text{CDCl}_3$ ):  $\delta$  8.33 (d,  $J = 9.7$  Hz, 2H), 8.04 (t,  $J = 7.8$  Hz, 1H), 4.04 (s, 6H).  $^1\text{H}$  NMR matches previously reported data<sup>12</sup>.

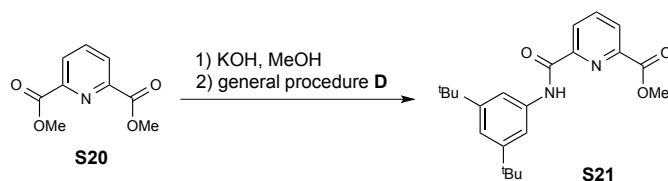

To a solution of **S20** in MeOH (265 mL) was added KOH (3.15 g, 56.1 mmol) in portions. The resulting mixture was stirred overnight at room temperature. Upon completion, the solvent was removed in vacuo, and the crude residue was washed with EtOAc extensively. This residue was dried under vacuum and used in the next step without further purification.

Potassium 6-(methoxycarbonyl)picolinate was converted to **S21** using general procedure **D** and was purified by column chromatography on silica gel using EtOAc/ hexanes (1:4) as the eluent.

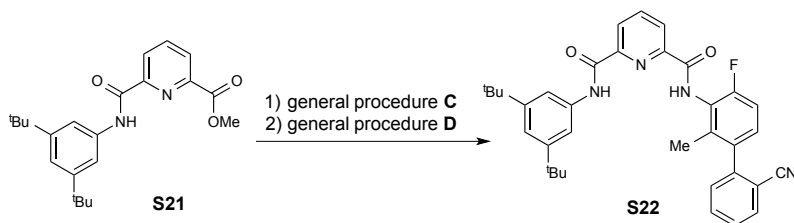

**S21** was converted to **S22** using general procedure **C** and **D**, then recrystallized from hot MeOH.

### Scheme S9 Synthesis of S24

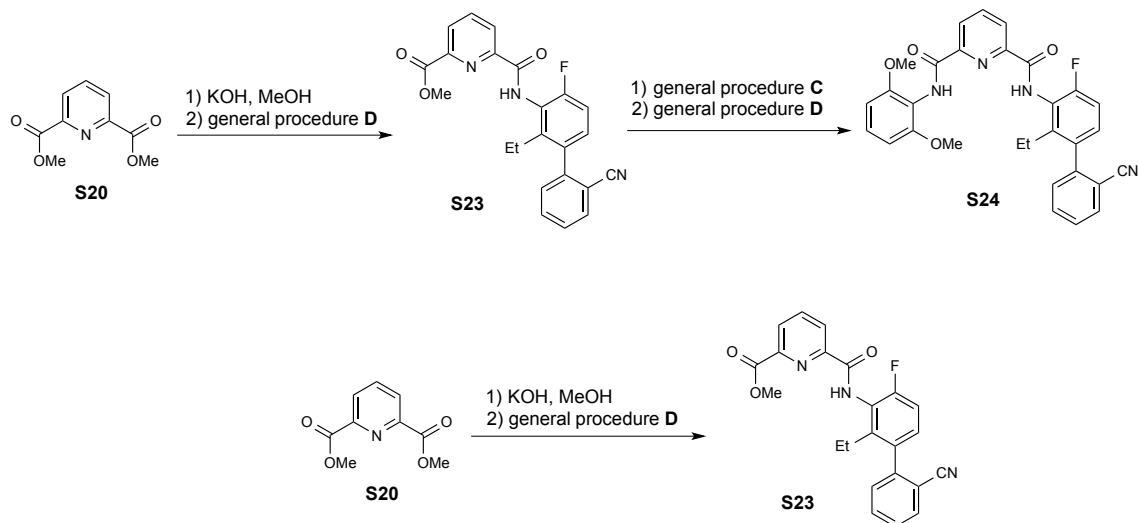

To a solution of **S20** in MeOH was added KOH in portions. The resulting mixture was stirred overnight at room temperature. Upon completion, the solvent was removed *in vacuo*, and the crude residue was washed with EtOAc extensively. This residue was dried under vacuum and used in the next step without further purification.

Potassium 6-(methoxycarbonyl)picolinate was converted to **S23** using general procedure **D** and was purified by column chromatography on silica gel using EtOAc/hexanes (1:2 to 1:1) as the eluent.

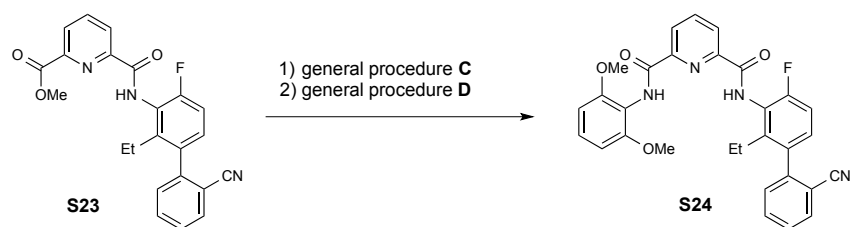

**S23** was converted to **S24** using general procedure **C** and **D** and was purified by column chromatography on silica gel using EtOAc/hexanes (1:1) as the eluent.

### Scheme S10 Synthesis of **T11**

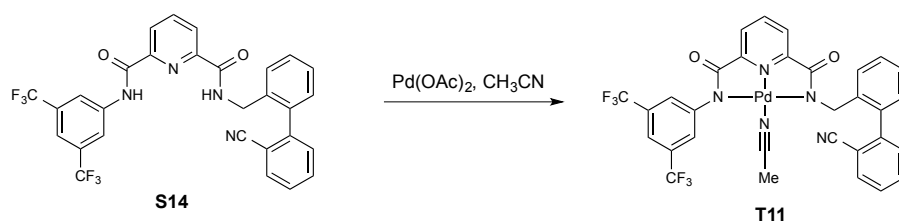

In the air, **S14** (0.188 g, 0.33 mmol) and  $\text{Pd(OAc)}_2$  (67.4 mg, 0.3 mmol) were added to a flask equipped with a stir bar. Acetonitrile (10 mL) was added to this flask and the resulting mixture was stirred at 60 °C. Upon completion, solvent was removed *in vacuo*. The residue was purified by column chromatography on silica gel using DCM/MeOH (100:1 to 20:1) as the eluent giving the pure **T11**. (**T12**~**T19** were synthesized following the same procedure.)

## 7. Procedure for Remote Site-selective C–H Olefination of Substrate 4

### 7.1 General Procedure

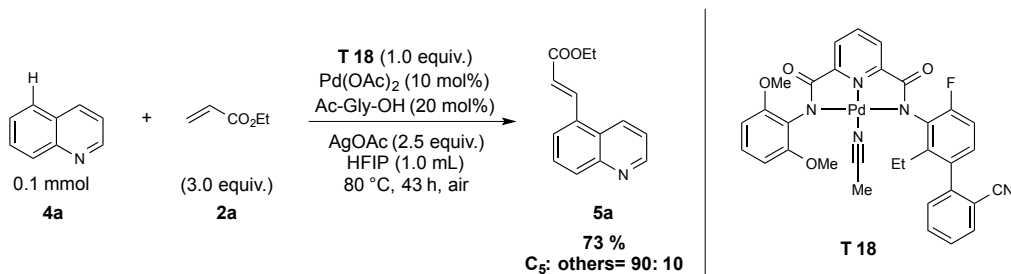

A reaction tube (15 mL) was charged with **4a** (12.9 mg, 0.1 mmol), **T18** (67.0 mg, 0.1 mmol) and minimal amount of DCM to dissolve the substrate and template. After 5 min, the mixture was concentrated *in vacuo*. Magnetic stir bar, Pd(OAc)<sub>2</sub> (2.2 mg, 0.01 mmol), Ac-Gly-OH (2.3 mg, 0.02 mmol), AgOAc (41.7 mg, 0.25 mmol), HFIP (1.0 ml) and **2a** (33.0 μl, 0.3 mmol) was added in the reaction tube in air. The reaction tube was sealed and allowed to stir at 80 °C for 43 h. Upon completion, the reaction mixture was cooled to room temperature. The crude reaction mixture was diluted with EtOAc and filtered through a short pad of celite. The sealed tube and celite pad were washed with additional EtOAc. The filtrate was concentrated *in vacuo*. To this residue toluene (2.0~2.5 mL) and DMAP (1.5~10 equiv.) was added. The solution was then stirred at 80 °C for 15 min. Upon completion, the reaction was cooled to room temperature. The mixture was passed through a short pad of silica (in the column) using EtOAc/hexanes=1:1 as the eluent to give the product mixture. (The silica pad was washed with DCM/MeOH=10:1 to give the crude template solution for the template regeneration. See **7.2 Template Recovery**.) The filtrate was concentrated *in vacuo* and the crude reaction mixture was purified on preparative TLC using DCM as the eluent to afford the desired product **5a**.

*Caution: The operator should have appropriate protection all the time when the reaction is running due to the high pressure generated in the sealed reaction flask under high temperature.*

### 7.2 Template Recovery

The crude template solution was concentrated *in vacuo* and dissolved in acetonitrile (3 mL). To this residue was added methanesulfonic acid (6.5 μl, 0.1 mmol) and the resulting mixture was heated at 60 °C for 2 h. Upon completion, the reaction mixture was cooled to room temperature.

The solvent was removed *in vacuo*. Water was added to the reaction mixture and extracted with DCM three times. The organic layer was dried with Na<sub>2</sub>SO<sub>4</sub> and concentrated *in vacuo*. This crude mixture was dissolved in acetonitrile (3 mL). To this reaction methanesulfonic acid (3.0 μL, 0.046 mmol) was added and the resulting mixture was heated at 60 °C for 30 min. Upon completion, the reaction mixture was cooled to room temperature. The solvent was removed *in vacuo*. Water was added to the reaction mixture and extracted with DCM three times. The organic layer was dried with Na<sub>2</sub>SO<sub>4</sub> and concentrated *in vacuo* to give template in 96 % yield (64.1 mg).

### The <sup>1</sup>H NMR chart for the recovered T18

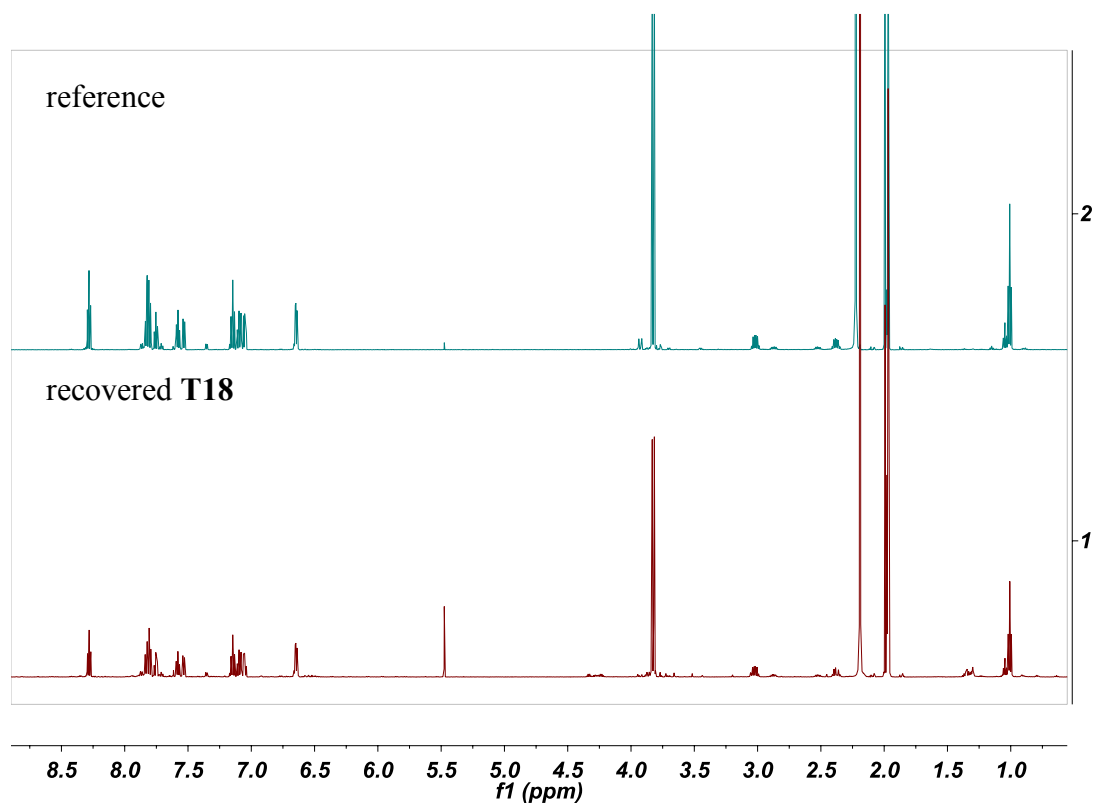

### The Efficiency Test of Recovered T18

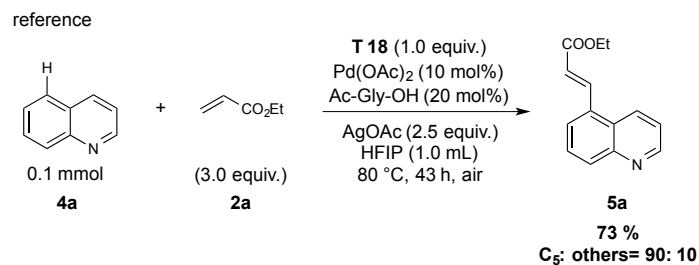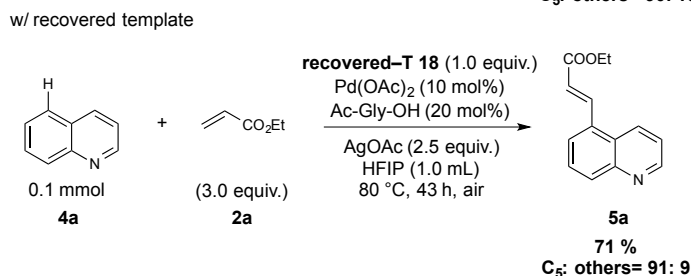

### 7.3 Procedure for Remote Site-selective C–H Olefination of Camptothecin **4p**

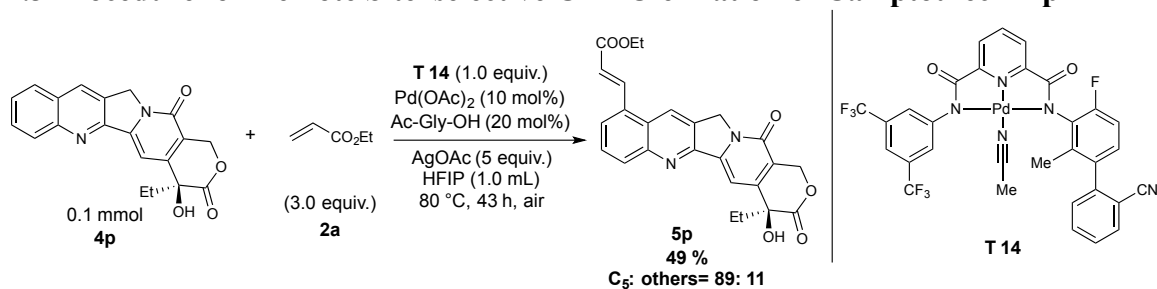

A reaction tube (15 mL) with magnetic stir bar was charged with **4p** (34.8 mg, 0.1 mmol), **T14** (73.2 mg, 0.1 mmol), Pd(OAc)<sub>2</sub> (2.2 mg, 0.01 mmol), Ac-Gly-OH (2.3 mg, 0.02 mmol), AgOAc (41.7 mg, 0.25 mmol), HFIP (1.0 mL) and **2a** (33.0 μL, 0.3 mmol) in air. The reaction tube was sealed and allowed to stir at 80 °C. After 24 h, additional AgOAc (41.7 mg, 0.25 mmol) was added to the reaction mixture and allowed to stir another 24 h at the same temperature. Upon completion, the reaction mixture was cooled to room temperature. The crude reaction mixture was diluted with EtOAc and filtered through a short pad of celite. The sealed tube and celite pad were washed with additional EtOAc. The filtrate was concentrated *in vacuo*. To this residue toluene (2.5 mL) and DMAP (1.5 equiv.) was added. The solution was then stirred at 80 °C for 15 min. Upon completion, the reaction was cooled to room temperature. The mixture was concentrated *in vacuo* and the crude reaction mixture was purified on preparative TLC using acetone/toluene (1:5) as the eluent to afford the desired product **5p**.

## 7.4 Control Experiments

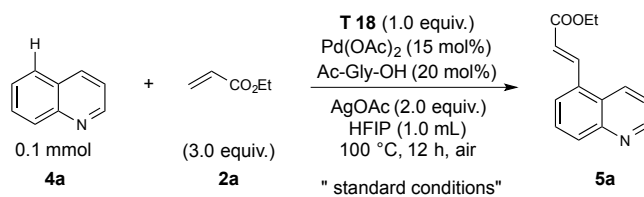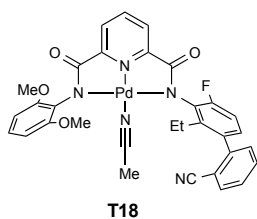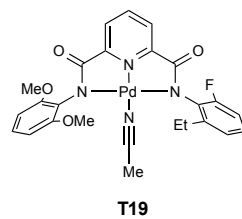

| entry | change from the "standard conditions"                                                   | yield ( %) (C <sub>5</sub> ) | C <sub>5</sub> :others |
|-------|-----------------------------------------------------------------------------------------|------------------------------|------------------------|
| 1     | none                                                                                    | 69                           | 92: 8                  |
| 2     | <b>T19</b> , instead of <b>T18</b>                                                      | 0                            |                        |
| 3     | no Pd(OAc) <sub>2</sub>                                                                 | 0                            |                        |
| 4     | no <b>T18</b> . 115 mol% Pd(OAc) <sub>2</sub> , instead of 15 mol% Pd(OAc) <sub>2</sub> | < 5                          | No selectivity         |
| 5     | no Ac-Gly-OH                                                                            | 24                           | 96: 4                  |

[a] The yield of the olefinated products, the C<sub>5</sub>: others ratio of olefinated products were determined by <sup>1</sup>H NMR analysis of the unpurified reaction mixture using 1,3,5-trimethoxybenzene as the internal standard, the variance is estimated to be within 5%. Ac-Gly-OH: *N*-acetyl-glycine.



## 8. Characterization of Templates, Substrates and Products

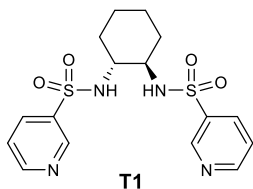

*N,N'*-((1*R*,2*R*)-cyclohexane-1,2-diyl)bis(pyridine-3-sulfonamide) **T1**. Colorless solid, 0.974 g. Yield: 82%. TLC (CH<sub>2</sub>Cl<sub>2</sub>:MeOH, 90:10 v/v): RF = 0.49; <sup>1</sup>H NMR (600 MHz, DMSO-*d*<sub>6</sub>): δ 8.90 (dd, *J* = 2.4, 0.8 Hz, 2H), 8.79 (dd, *J* = 4.8, 1.6 Hz, 2H), 8.11 (ddd, *J* = 8.0, 2.4, 1.6 Hz, 2H), 7.80 (br, 1H), 7.79 (br, 1H), 7.59 (ddd, *J* = 8.0, 4.8, 0.8 Hz, 2H), 2.97–2.95 (m, 2H), 1.50–1.48 (m, 2H), 1.44–1.42 (m, 2H), 1.20–1.15 (m, 2H), 1.10–1.04 (m, 2H); <sup>13</sup>C NMR (151 MHz, DMSO-*d*<sub>6</sub>): δ 152.79, 146.84, 138.12, 134.28, 124.15, 55.00, 30.54, 22.50; HRMS (ESI-TOF) *m/z*: [M+H]<sup>+</sup> calcd. for C<sub>16</sub>H<sub>21</sub>N<sub>4</sub>O<sub>4</sub>S<sub>2</sub><sup>+</sup>, 397.0999; found 397.1001.

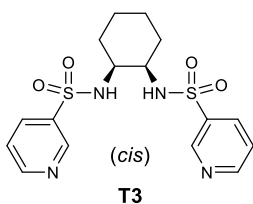

*N,N'*-((1*R*,2*S*)-cyclohexane-1,2-diyl)bis(pyridine-3-sulfonamide) **T3**. Colorless solid, 0.927 g. Yield: 78%. TLC (CH<sub>2</sub>Cl<sub>2</sub>:MeOH, 90:10 v/v): RF = 0.46; <sup>1</sup>H NMR (600 MHz, DMSO-*d*<sub>6</sub>): δ 8.95 (dd, *J* = 2.4, 0.6 Hz, 2H), 8.78 (dd, *J* = 4.8, 1.6 Hz, 2H), 8.17 (ddd, *J* = 8.0, 2.4, 1.6 Hz, 2H), 7.73 (br, 1H), 7.72 (br, 1H), 7.60 (ddd, *J* = 8.0, 4.8, 0.7 Hz, 2H), 2.30–2.27 (m, 2H), 1.43–1.38 (m, 2H), 1.34–1.31 (m, 2H), 1.19–1.15 (m, 2H), 1.10–1.05 (m, 2H); <sup>13</sup>C NMR (151 MHz, DMSO-*d*<sub>6</sub>): δ 152.82, 152.78, 146.97, 146.93, 138.07, 134.36, 124.16, 124.12, 53.82, 28.10, 20.92; HRMS (ESI-TOF) *m/z*: [M+H]<sup>+</sup> calcd. for C<sub>16</sub>H<sub>21</sub>N<sub>4</sub>O<sub>4</sub>S<sub>2</sub><sup>+</sup>, 397.0999; found 397.1001.

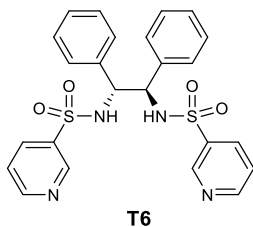

*N,N'*-((1*R*,2*R*)-1,2-diphenylethane-1,2-diyl)bis(pyridine-3-sulfonamide) **T6**. White solid, 1.05 g. Yield: 71%. TLC (CH<sub>2</sub>Cl<sub>2</sub>:MeOH, 90:10 v/v): RF = 0.49; <sup>1</sup>H NMR (600 MHz, DMSO-*d*<sub>6</sub>): δ 8.90–8.86 (m, 2H), 8.48 (d, *J* = 1.8 Hz, 2H), 8.45 (dd, *J* = 4.8, 1.8 Hz, 2H), 7.63 (ddd, *J* = 7.8, 2.4, 1.8 Hz, 2H), 7.16 (ddd, *J* = 8.4, 4.8, 0.6 Hz, 2H), 6.83–6.75 (m, 10H), 4.58–4.54 (m, 2H); <sup>13</sup>C NMR (151 MHz, DMSO-*d*<sub>6</sub>): δ 151.87, 151.83, 146.61, 146.57, 137.54, 136.68, 133.72, 133.67, 127.57, 127.38, 126.97, 123.31, 123.25, 62.24; HRMS (ESI-TOF) *m/z*: [M+H]<sup>+</sup> calcd. for C<sub>24</sub>H<sub>23</sub>N<sub>4</sub>O<sub>4</sub>S<sub>2</sub><sup>+</sup>, 495.1155; found 495.1156.

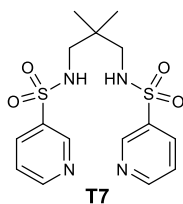

*N,N'*-(2,2-dimethylpropane-1,3-diyl)bis(pyridine-3-sulfonamide) **T7**. White solid, 0.761 g. Yield: 66%. TLC (CH<sub>2</sub>Cl<sub>2</sub>:MeOH, 90:10 v/v): RF = 0.44; <sup>1</sup>H NMR (600 MHz, DMSO-*d*<sub>6</sub>): δ 8.93 (dd, *J* = 2.4, 0.6 Hz, 2H), 8.81 (dd, *J* = 4.8, 1.8 Hz, 2H), 8.15 (ddd, *J* = 8.0, 2.4, 1.8 Hz, 2H), 7.76 (br, 2H), 7.64 (ddd, *J* = 8.0, 4.8, 0.6 Hz, 2H), 2.60 (s, 4H), 0.78 (s, 6H); <sup>13</sup>C NMR (151 MHz, DMSO-*d*<sub>6</sub>): δ 152.95, 152.91, 146.97, 146.93, 137.04, 134.41, 124.29, 124.24, 50.52, 35.05, 22.51, 22.50; HRMS (ESI-TOF) *m/z*: [M+H]<sup>+</sup> calcd. for C<sub>15</sub>H<sub>21</sub>N<sub>4</sub>O<sub>4</sub>S<sub>2</sub><sup>+</sup>, 385.0999; found 385.0999.

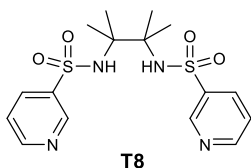

*N,N'*-(2,3-dimethylbutane-2,3-diyl)bis(pyridine-3-sulfonamide) **T8**. Pale yellow solid, 388 mg. Yield: 53%. TLC (CH<sub>2</sub>Cl<sub>2</sub>:MeOH, 90:10 v/v): RF = 0.46; <sup>1</sup>H NMR (600 MHz, DMSO-*d*<sub>6</sub>): δ 8.99 (d, *J* = 2.4, Hz, 2H), 8.81 (dd, *J* = 4.8, 1.6 Hz, 2H), 8.22 (ddd, *J* = 8.0, 2.4, 1.6 Hz, 2H), 7.65 (ddd, *J* = 8.0, 4.8, 0.7 Hz, 2H), 7.58 (br, 2H), 1.07 (s, 12H); <sup>13</sup>C NMR (151 MHz, DMSO-*d*<sub>6</sub>): δ 152.83, 146.93, 140.26, 134.29, 124.36, 62.14, 22.14; HRMS (ESI-TOF) *m/z*: [M+H]<sup>+</sup> calcd. for C<sub>16</sub>H<sub>23</sub>N<sub>4</sub>O<sub>4</sub>S<sub>2</sub><sup>+</sup>, 399.1155; found 399.1155.

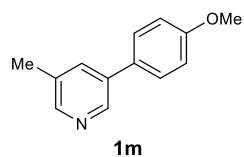

3-(4-methoxyphenyl)-5-methylpyridine **1m**. TLC (Hexane:EtOAc, 50:50 v/v): RF = 0.41;  $^1\text{H}$  NMR (600 MHz,  $\text{CDCl}_3$ ):  $\delta$  8.62 (d,  $J = 2.4$  Hz, 1H), 8.38 (d,  $J = 1.8$  Hz, 1H), 7.64–7.62 (m, 1H), 7.51 (d,  $J = 9.0$  Hz, 2H), 7.00 (d,  $J = 9.0$  Hz, 2H), 3.86 (s, 3H), 2.39 (s, 3H);  $^{13}\text{C}$  NMR (151 MHz,  $\text{CDCl}_3$ ):  $\delta$  159.63, 148.39, 145.20, 135.71, 134.46, 132.87, 130.35, 128.18, 114.45, 55.35, 18.46; HRMS (ESI-TOF)  $m/z$ :  $[\text{M}+\text{H}]^+$  calcd. for  $\text{C}_{13}\text{H}_{14}\text{NO}^+$ , 200.1070; found 200.1064.

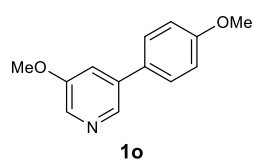

3-methoxy-5-(4-methoxyphenyl)pyridine **1o**. TLC (Hexane:EtOAc, 50:50 v/v): RF = 0.39;  $^1\text{H}$  NMR (600 MHz,  $\text{CDCl}_3$ ):  $\delta$  8.42 (d,  $J = 1.8$  Hz, 1H), 8.25 (d,  $J = 3.0$  Hz, 1H), 7.51 (d,  $J = 9.0$  Hz, 2H), 7.32 (dd,  $J = 3.0, 1.8$  Hz, 1H), 7.00 (d,  $J = 9.0$  Hz, 2H), 3.91 (s, 3H), 3.86 (s, 3H);  $^{13}\text{C}$  NMR (151 MHz,  $\text{CDCl}_3$ ):  $\delta$  159.78, 155.71, 140.43, 136.93, 135.37, 130.04, 128.29, 118.63, 114.47, 55.58, 55.35; HRMS (ESI-TOF)  $m/z$ :  $[\text{M}+\text{H}]^+$  calcd. for  $\text{C}_{13}\text{H}_{14}\text{NO}_2^+$ , 216.1019; found 216.1019.

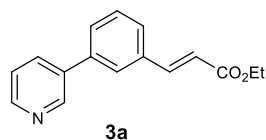

ethyl (*E*)-3-(3-(pyridin-3-yl)phenyl)acrylate **3a**. Pale yellow solid, 16.3 mg. Yield: 64%. TLC (Hexane:EtOAc, 50:50 v/v): RF = 0.34;  $^1\text{H}$  NMR (600 MHz,  $\text{CDCl}_3$ ):  $\delta$  8.85 (s, 1H), 8.62 (d,  $J = 3.6$  Hz, 1H), 7.87 (ddd,  $J = 7.8, 2.4, 1.8$  Hz, 1H), 7.74 (d,  $J = 16.2$  Hz, 1H), 7.70 (s, 1H), 7.59 (d,  $J = 7.8$  Hz, 1H), 7.56 (d,  $J = 7.8$  Hz, 1H), 7.50 (t,  $J = 7.8$  Hz, 1H), 7.38 (dd,  $J = 7.8, 4.8$  Hz, 1H), 6.51 (d,  $J = 16.2$  Hz, 1H), 4.28 (q,  $J = 7.2$  Hz, 2H), 1.34 (t,  $J = 7.2$  Hz, 3H);  $^{13}\text{C}$  NMR (151 MHz,  $\text{CDCl}_3$ ):  $\delta$  166.74, 148.86, 148.24, 143.93, 138.59, 135.91, 135.31, 134.33, 129.62, 128.85, 127.48, 126.78, 123.58, 119.12, 60.60, 14.29; HRMS (ESI-TOF)  $m/z$ :  $[\text{M}+\text{H}]^+$  calcd. for  $\text{C}_{16}\text{H}_{16}\text{NO}_2^+$ , 254.1176; found 254.1177.

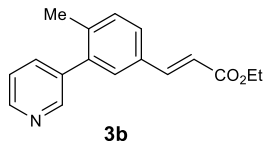

ethyl (*E*)-3-(4-methyl-3-(pyridin-3-yl)phenyl)acrylate **3b**. Pale yellow solid, 16.0 mg. Yield: 60%. TLC (Hexane:EtOAc, 50:50 v/v): RF = 0.41; <sup>1</sup>H NMR (600 MHz, CDCl<sub>3</sub>): δ 8.62 (dd, *J* = 4.8, 1.8 Hz, 1H), 8.59 (dd, *J* = 2.4, 1.2 Hz, 1H), 7.68 (d, *J* = 16.2 Hz, 1H), 7.65 (ddd, *J* = 7.8, 1.8, 1.2 Hz, 1H), 7.47 (dd, *J* = 8.4, 2.4 Hz, 1H), 7.38–7.36 (m, 2H), 7.32 (d, *J* = 8.4 Hz, 1H), 6.43 (d, *J* = 16.2 Hz, 1H), 4.26 (q, *J* = 7.2 Hz, 2H), 2.28 (s, 3H), 1.33 (t, *J* = 7.2 Hz, 3H); <sup>13</sup>C NMR (151 MHz, CDCl<sub>3</sub>): δ 166.94, 149.80, 148.51, 143.88, 138.72, 138.18, 136.67, 136.34, 132.49, 131.17, 129.49, 127.52, 123.10, 118.05, 60.48, 20.39, 14.30; HRMS (ESI-TOF) *m/z*: [M+H]<sup>+</sup> calcd. for C<sub>17</sub>H<sub>18</sub>NO<sub>2</sub><sup>+</sup>, 268.1332; found 268.1337.

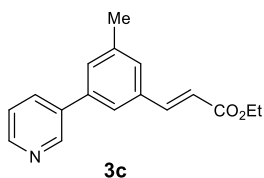

ethyl (*E*)-3-(3-methyl-5-(pyridin-3-yl)phenyl)acrylate **3c**. White solid, 16.0 mg. Yield: 60%. TLC (Hexane:EtOAc, 50:50 v/v): RF = 0.39; <sup>1</sup>H NMR (600 MHz, CDCl<sub>3</sub>): δ 8.84 (d, *J* = 1.4 Hz, 1H), 8.62 (d, *J* = 4.0 Hz, 1H), 7.87 (dt, *J* = 7.9, 1.8 Hz, 1H), 7.72 (d, *J* = 16.0 Hz, 1H), 7.52 (s, 1H), 7.40 (s, 1H), 7.39 (s, 1H), 7.38 (dd, *J* = 7.9, 4.8 Hz, 1H), 6.50 (d, *J* = 16.0 Hz, 1H), 4.28 (q, *J* = 7.1 Hz, 2H), 2.45 (s, 3H), 1.35 (t, *J* = 7.1 Hz, 3H); <sup>13</sup>C NMR (151 MHz, CDCl<sub>3</sub>): δ 166.85, 148.78, 148.27, 144.14, 141.74, 139.43, 138.56, 135.27, 134.37, 129.76, 128.24, 124.11, 123.56, 118.89, 60.57, 21.41, 14.31; HRMS (ESI-TOF) *m/z*: [M+H]<sup>+</sup> calcd. for C<sub>17</sub>H<sub>18</sub>NO<sub>2</sub><sup>+</sup>, 268.1332; found 268.1328.

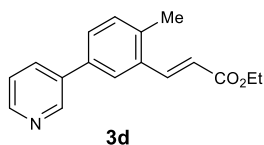

ethyl (*E*)-3-(2-methyl-5-(pyridin-3-yl)phenyl)acrylate **3d**. Pale yellow solid, 16.3 mg. Yield: 61%. TLC (Hexane:EtOAc, 50:50 v/v): RF = 0.39; <sup>1</sup>H NMR (600 MHz, CDCl<sub>3</sub>): δ 8.83 (d, *J* = 2.4 Hz, 1H), 8.59 (dd, *J* = 4.8, 1.2 Hz, 1H), 8.00 (d, *J* = 16.2 Hz, 1H), 7.86 (dt, *J* = 7.8, 1.8 Hz, 1H), 7.74 (d, *J* = 1.2 Hz, 1H), 7.49 (dd, *J* = 7.8, 1.8 Hz, 1H), 7.36 (dd, *J* = 7.8, 4.8 Hz, 1H), 7.32

(d,  $J = 7.8$  Hz, 1H), 6.44 (d,  $J = 16.2$  Hz, 1H), 4.28 (q,  $J = 7.2$  Hz, 2H), 2.48 (s, 3H), 1.35 (t,  $J = 7.2$  Hz, 3H);  $^{13}\text{C}$  NMR (151 MHz,  $\text{CDCl}_3$ ):  $\delta$  166.82, 148.57, 148.10, 141.84, 137.51, 135.99, 135.94, 134.20, 134.14, 131.55, 128.44, 125.05, 123.54, 120.10, 60.59, 19.52, 14.30; HRMS (ESI-TOF)  $m/z$ :  $[\text{M}+\text{H}]^+$  calcd. for  $\text{C}_{17}\text{H}_{18}\text{NO}_2^+$ , 268.1332; found 268.1335.

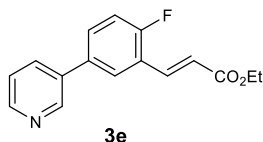

ethyl (*E*)-3-(2-fluoro-5-(pyridin-3-yl)phenyl)acrylate **3e**. Pale yellow solid, 17.9 mg. Yield: 66%. TLC (Hexane:EtOAc, 50:50 v/v): RF = 0.32;  $^1\text{H}$  NMR (600 MHz,  $\text{CDCl}_3$ ):  $\delta$  8.80 (d,  $J = 1.8$  Hz, 1H), 8.61 (dd,  $J = 4.8, 1.8$  Hz, 1H), 7.84 (d,  $J = 16.2$  Hz, 1H), 7.83 (dt,  $J = 7.8, 1.8$  Hz, 1H), 7.71 (dd,  $J = 6.6, 2.4$  Hz, 1H), 7.56–7.53 (m, 1H), 7.38 (dd,  $J = 7.8, 4.8$  Hz, 1H), 7.22 (dd,  $J = 10.2, 8.4$  Hz, 1H), 6.61 (d,  $J = 16.2$  Hz, 1H), 4.28 (q,  $J = 7.2$  Hz, 2H), 1.34 (t,  $J = 7.2$  Hz, 3H);  $^{13}\text{C}$  NMR (151 MHz,  $\text{CDCl}_3$ ):  $\delta$  166.56, 161.25 (d,  $J_{\text{C-F}} = 256.7$  Hz), 148.87, 148.07, 136.70 (d,  $J_{\text{C-F}} = 2.4$  Hz), 135.11, 134.47 (d,  $J_{\text{C-F}} = 3.8$  Hz), 134.21, 130.20 (d,  $J_{\text{C-F}} = 8.9$  Hz), 127.77 (d,  $J_{\text{C-F}} = 3.3$  Hz), 123.60, 123.14 (d,  $J_{\text{C-F}} = 12.5$  Hz), 121.68 (d,  $J_{\text{C-F}} = 6.8$  Hz), 116.97 (d,  $J_{\text{C-F}} = 22.7$  Hz), 60.72, 14.27; HRMS (ESI-TOF)  $m/z$ :  $[\text{M}+\text{H}]^+$  calcd. for  $\text{C}_{16}\text{H}_{15}\text{FNO}_2^+$ , 272.1081; found 272.1081.

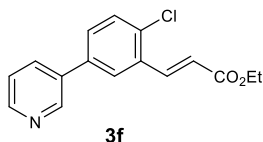

ethyl (*E*)-3-(2-chloro-5-(pyridin-3-yl)phenyl)acrylate **3f**. White solid, 14.4 mg. Yield: 50%. TLC (Hexane:EtOAc, 50:50 v/v): RF = 0.38;  $^1\text{H}$  NMR (600 MHz,  $\text{CDCl}_3$ ):  $\delta$  8.82 (dd,  $J = 2.4, 0.8$  Hz, 1H), 8.63 (dd,  $J = 4.8, 2.4$  Hz, 1H), 8.11 (d,  $J = 16.0$  Hz, 1H), 7.85 (ddd,  $J = 7.8, 2.4, 1.6$  Hz, 1H), 7.79 (d,  $J = 2.0$  Hz, 1H), 7.52 (d,  $J = 0.5$  Hz, 1H), 7.51 (d,  $J = 2.0$  Hz, 1H), 7.39 (ddd,  $J = 7.8, 4.8, 0.8$  Hz, 1H), 6.52 (d,  $J = 16.0$  Hz, 1H), 4.29 (q,  $J = 7.1$  Hz, 2H), 1.35 (t,  $J = 7.2$  Hz, 3H);  $^{13}\text{C}$  NMR (151 MHz,  $\text{CDCl}_3$ ):  $\delta$  166.26, 149.14, 148.07, 139.96, 136.99, 135.01, 134.82, 134.22, 133.43, 130.83, 129.46, 126.21, 123.64, 121.66, 60.80, 14.28; HRMS (ESI-TOF)  $m/z$ :  $[\text{M}+\text{H}]^+$  calcd. for  $\text{C}_{16}\text{H}_{15}\text{ClNO}_2^+$ , 288.0786; found 288.0788.

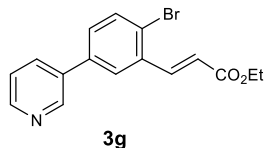

ethyl (*E*)-3-(2-bromo-5-(pyridin-3-yl)phenyl)acrylate **3g**. White solid, 20.0 mg. Yield: 60%. TLC (Hexane:EtOAc, 50:50 v/v): RF = 0.38; <sup>1</sup>H NMR (600 MHz, CDCl<sub>3</sub>): δ 8.83 (d, *J* = 2.4 Hz, 1H), 8.64 (dd, *J* = 4.2, 1.2 Hz, 1H), 8.08 (d, *J* = 16.2 Hz, 1H), 7.86 (dt, *J* = 7.8, 1.8 Hz, 1H), 7.77 (d, *J* = 2.4 Hz, 1H), 7.72 (d, *J* = 8.4 Hz, 1H), 7.43 (dd, *J* = 8.4, 2.4 Hz, 1H), 7.39 (dd, *J* = 7.8, 4.8 Hz, 1H), 6.48 (d, *J* = 16.2 Hz, 1H), 4.30 (q, *J* = 7.2 Hz, 2H), 1.36 (t, *J* = 7.2 Hz, 3H); <sup>13</sup>C NMR (151 MHz, CDCl<sub>3</sub>): δ 166.18, 149.21, 148.05, 142.51, 137.65, 135.30, 135.03, 134.18, 134.10, 129.63, 126.34, 125.07, 123.67, 121.84, 60.81, 14.29; HRMS (ESI-TOF) *m/z*: [M+H]<sup>+</sup> calcd. for C<sub>16</sub>H<sub>15</sub>BrNO<sub>2</sub><sup>+</sup>, 332.0281; found 332.0280.

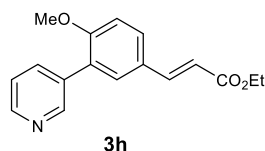

ethyl (*E*)-3-(4-methoxy-3-(pyridin-3-yl)phenyl)acrylate **3h**. White solid, 17.3 mg. Yield: 61%. TLC (Hexane:EtOAc, 50:50 v/v): RF = 0.31; <sup>1</sup>H NMR (600 MHz, CDCl<sub>3</sub>): δ 8.75 (d, *J* = 1.8 Hz, 1H), 8.58 (dd, *J* = 4.8, 1.2 Hz, 1H), 7.83 (dt, *J* = 7.8, 1.8 Hz, 1H), 7.68 (d, *J* = 16.2 Hz, 1H), 7.54 (dd, *J* = 8.4, 1.2 Hz, 1H), 7.49 (d, *J* = 2.4 Hz, 1H), 7.34 (dd, *J* = 7.8, 4.8 Hz, 1H), 7.01 (d, *J* = 8.4 Hz, 1H), 6.35 (d, *J* = 16.2 Hz, 1H), 4.25 (q, *J* = 7.2 Hz, 2H), 3.86 (s, 3H), 1.33 (t, *J* = 7.2 Hz, 3H); <sup>13</sup>C NMR (151 MHz, CDCl<sub>3</sub>): δ 167.11, 158.19, 150.15, 148.32, 143.68, 136.68, 133.41, 130.24, 129.75, 127.63, 127.51, 122.94, 116.50, 111.43, 60.39, 55.73, 14.32; HRMS (ESI-TOF) *m/z*: [M+H]<sup>+</sup> calcd. for C<sub>17</sub>H<sub>18</sub>NO<sub>3</sub><sup>+</sup>, 284.1281; found 284.1280.

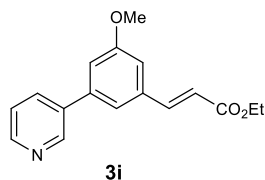

ethyl (*E*)-3-(3-methoxy-5-(pyridin-3-yl)phenyl)acrylate **3i**. Colorless liquid, 2.8 mg. Yield: 10%. TLC (Hexane:EtOAc, 50:50 v/v): RF = 0.36; <sup>1</sup>H NMR (600 MHz, CDCl<sub>3</sub>): δ 8.84 (d, *J* = 4.8 Hz, 1H), 8.62 (dd, *J* = 4.8, 1.8 Hz, 1H), 7.87 (dt, *J* = 7.8, 1.8 Hz, 1H), 7.71 (d, *J* = 15.6 Hz, 1H), 7.37 (dd, *J* = 7.8, 4.8 Hz, 1H), 7.31 (s, 1H), 7.12 (s, 1H), 7.09 (s, 1H), 6.50 (d, *J* = 15.6 Hz, 1H), 4.28

(q,  $J = 7.2$  Hz, 2H), 3.90 (s, 3H), 1.35 (t,  $J = 7.2$  Hz, 3H);  $^{13}\text{C}$  NMR (151 MHz,  $\text{CDCl}_3$ ):  $\delta$  166.74, 160.45, 148.95, 148.23, 143.98, 139.87, 136.58, 135.92, 134.45, 123.60, 119.68, 119.35, 114.99, 112.20, 60.65, 55.52, 14.31; HRMS (ESI-TOF)  $m/z$ :  $[\text{M}+\text{H}]^+$  calcd. for  $\text{C}_{17}\text{H}_{18}\text{NO}_3^+$ , 284.1281; found 284.1274.

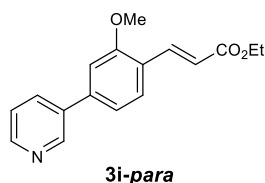

ethyl (*E*)-3-(2-methoxy-4-(pyridin-3-yl)phenyl)acrylate **3i-para**. Colorless liquid, 8.0 mg. Yield: 28%. TLC (Hexane:EtOAc, 50:50 v/v):  $R_F = 0.26$ ;  $^1\text{H}$  NMR (600 MHz,  $\text{CDCl}_3$ ):  $\delta$  8.86 (d,  $J = 2.4$  Hz, 1H), 8.62 (dd,  $J = 4.8, 1.2$  Hz, 1H), 8.00 (d,  $J = 16.2$  Hz, 1H), 7.89 (ddd,  $J = 7.8, 2.4, 1.8$  Hz, 1H), 7.61 (d,  $J = 8.4$  Hz, 1H), 7.38 (dd,  $J = 7.8, 4.8$  Hz, 1H), 7.18 (dd,  $J = 7.8, 1.8$  Hz, 1H), 7.09 (d,  $J = 1.2$  Hz, 1H), 6.58 (d,  $J = 16.2$  Hz, 1H), 4.28 (q,  $J = 7.2$  Hz, 2H), 3.97 (s, 3H), 1.35 (t,  $J = 7.2$  Hz, 3H);  $^{13}\text{C}$  NMR (151 MHz,  $\text{CDCl}_3$ ):  $\delta$  167.39, 158.71, 149.00, 148.18, 140.90, 139.23, 136.01, 134.30, 129.58, 123.59, 123.29, 119.55, 119.26, 109.79, 60.42, 55.63, 14.36; HRMS (ESI-TOF)  $m/z$ :  $[\text{M}+\text{H}]^+$  calcd. for  $\text{C}_{17}\text{H}_{18}\text{NO}_3^+$ , 284.1281; found 284.1273.

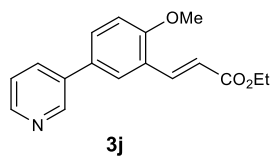

ethyl (*E*)-3-(2-methoxy-5-(pyridin-3-yl)phenyl)acrylate **3j**. White solid, 23.8 mg. Yield: 84%. TLC (Hexane:EtOAc, 50:50 v/v):  $R_F = 0.29$ ;  $^1\text{H}$  NMR (600 MHz,  $\text{CDCl}_3$ ):  $\delta$  8.81 (d,  $J = 2.4$  Hz, 1H), 8.57 (dd,  $J = 4.8, 1.2$  Hz, 1H), 8.01 (d,  $J = 16.2$  Hz, 1H), 7.83 (ddd,  $J = 7.8, 2.4, 1.8$  Hz, 1H), 7.70 (d,  $J = 2.4$  Hz, 1H), 7.56 (dd,  $J = 9.0, 2.4$  Hz, 1H), 7.35 (ddd,  $J = 7.8, 4.8, 1.2$  Hz, 1H), 7.02 (d,  $J = 8.4$  Hz, 1H), 6.60 (d,  $J = 16.2$  Hz, 1H), 4.27 (q,  $J = 7.2$  Hz, 2H), 3.94 (s, 3H), 1.34 (t,  $J = 7.2$  Hz, 3H);  $^{13}\text{C}$  NMR (151 MHz,  $\text{CDCl}_3$ ):  $\delta$  167.26, 158.32, 148.23, 147.92, 139.51, 135.67, 133.87, 130.36, 129.86, 127.55, 124.08, 123.52, 119.62, 111.77, 60.44, 55.70, 14.34; HRMS (ESI-TOF)  $m/z$ :  $[\text{M}+\text{H}]^+$  calcd. for  $\text{C}_{17}\text{H}_{18}\text{NO}_3^+$ , 284.1281; found 284.1286.

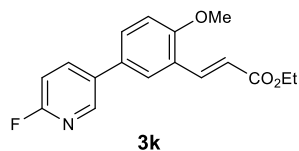

ethyl (*E*)-3-(5-(6-fluoropyridin-3-yl)-2-methoxyphenyl)acrylate **3k**. White solid, 19.6 mg. Yield: 65%. TLC (Hexane:EtOAc, 50:50 v/v): RF = 0.70; <sup>1</sup>H NMR (600 MHz, CDCl<sub>3</sub>): δ 8.37 (s, 1H), 8.00 (d, *J* = 16.2 Hz, 1H), 7.92 (td, *J* = 8.4, 2.4 Hz, 1H), 7.64 (d, *J* = 1.8 Hz, 1H), 7.50 (dd, *J* = 9.0, 2.4 Hz, 1H), 7.02 (d, *J* = 8.4 Hz, 1H), 6.99 (dd, *J* = 9.0, 2.4 Hz, 1H), 6.59 (d, *J* = 16.2 Hz, 1H), 4.27 (q, *J* = 7.2 Hz, 2H), 3.94 (s, 3H), 1.34 (t, *J* = 7.2 Hz, 3H); <sup>13</sup>C NMR (151 MHz, CDCl<sub>3</sub>): δ 167.24, 162.94 (d, *J*<sub>C-F</sub> = 239.2 Hz), 158.35, 145.41 (d, *J*<sub>C-F</sub> = 14.6 Hz), 139.41, 139.32 (d, *J*<sub>C-F</sub> = 7.9 Hz), 133.94 (d, *J*<sub>C-F</sub> = 4.5 Hz), 129.79, 129.27, 127.48, 124.15, 119.78, 111.84, 109.47 (d, *J*<sub>C-F</sub> = 37.6 Hz), 60.50, 55.75, 14.36; HRMS (ESI-TOF) *m/z*: [M+H]<sup>+</sup> calcd. for C<sub>17</sub>H<sub>17</sub>FNO<sub>3</sub><sup>+</sup>, 302.1187; found 302.1188.

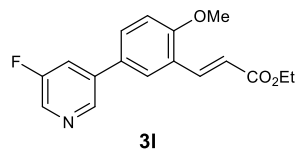

ethyl (*E*)-3-(5-(5-fluoropyridin-3-yl)-2-methoxyphenyl)acrylate **3l**. Pale yellow solid, 21.2 mg. Yield: 70%. TLC (Hexane:EtOAc, 50:50 v/v): RF = 0.56; <sup>1</sup>H NMR (600 MHz, CDCl<sub>3</sub>): δ 8.63 (t, *J* = 1.7 Hz, 1H), 8.43 (d, *J* = 2.7 Hz, 1H), 8.00 (d, *J* = 16.2 Hz, 1H), 7.69 (d, *J* = 2.4 Hz, 1H), 7.56–7.53 (m, 2H), 7.03 (d, *J* = 8.6 Hz, 1H), 6.60 (d, *J* = 16.2 Hz, 1H), 4.27 (q, *J* = 7.2 Hz, 2H), 3.94 (s, 3H), 1.34 (t, *J* = 7.2 Hz, 3H); <sup>13</sup>C NMR (151 MHz, CDCl<sub>3</sub>): δ 167.15, 159.66 (d, *J*<sub>C-F</sub> = 256.7 Hz), 158.68, 143.67 (d, *J*<sub>C-F</sub> = 4.5 Hz), 139.25, 137.30 (d, *J*<sub>C-F</sub> = 4.5 Hz), 136.37 (d, *J*<sub>C-F</sub> = 22.7 Hz), 129.90, 128.87, 127.60, 124.25, 120.5 (d, *J*<sub>C-F</sub> = 18.1 Hz), 119.89, 111.86, 60.47, 55.73, 14.32; HRMS (ESI-TOF) *m/z*: [M+H]<sup>+</sup> calcd. for C<sub>17</sub>H<sub>17</sub>FNO<sub>3</sub><sup>+</sup>, 302.1187; found 302.1190.

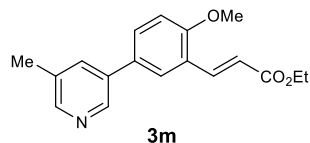

ethyl (*E*)-3-(2-methoxy-5-(5-methylpyridin-3-yl)phenyl)acrylate **3m**. White solid, 21.6 mg. Yield: 72%. TLC (Hexane:EtOAc, 50:50 v/v): RF = 0.28; <sup>1</sup>H NMR (600 MHz, CDCl<sub>3</sub>): δ 8.60 (d, *J* = 1.8 Hz, 1H), 8.40 (d, *J* = 2.4 Hz, 1H), 8.01 (d, *J* = 16.2 Hz, 1H), 7.69 (d, *J* = 2.4 Hz, 1H),



7.63-7.62 (m, 1H), 7.55 (dd,  $J = 8.4, 2.4$  Hz, 1H), 7.00 (d,  $J = 8.4$  Hz, 1H), 6.60 (d,  $J = 16.2$  Hz, 1H), 4.27 (q,  $J = 7.2$  Hz, 2H), 3.93 (s, 3H), 2.40 (s, 3H), 1.34 (t,  $J = 7.2$  Hz, 3H);  $^{13}\text{C}$  NMR (151 MHz,  $\text{CDCl}_3$ ):  $\delta$  167.25, 158.21, 148.72, 145.07, 139.54, 135.13, 134.47, 133.00, 130.43, 129.85, 127.47, 123.98, 119.49, 111.69, 60.41, 55.67, 18.43, 14.33; HRMS (ESI-TOF)  $m/z$ :  $[\text{M}+\text{H}]^+$  calcd. for  $\text{C}_{18}\text{H}_{20}\text{NO}_3^+$ , 298.1438; found 298.1434.

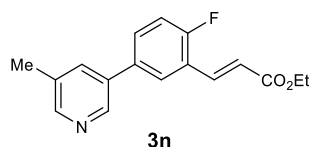

ethyl (*E*)-3-(2-fluoro-5-(5-methylpyridin-3-yl)phenyl)acrylate **3n**. Pale yellow solid, 20.1 mg. Yield: 70%. TLC (Hexane:EtOAc, 50:50 v/v):  $R_F = 0.40$ ;  $^1\text{H}$  NMR (600 MHz,  $\text{CDCl}_3$ ):  $\delta$  8.60 (s, 1H), 8.45 (d, 1H), 7.84 (d,  $J = 16.2$  Hz, 1H), 7.70 (dd,  $J = 6.8, 2.3$  Hz, 1H), 7.63 (s, 1H), 7.55–7.52 (m, 1H), 7.20 (dd,  $J = 10.1, 8.5$  Hz, 1H), 6.61 (d,  $J = 16.2$  Hz, 1H), 4.28 (q,  $J = 7.1$  Hz, 2H), 2.41 (s, 3H), 1.34 (t,  $J = 7.1$  Hz, 3H);  $^{13}\text{C}$  NMR (151 MHz,  $\text{CDCl}_3$ ):  $\delta$  166.58, 161.18 (d,  $J_{\text{C-F}} = 255.6$  Hz), 149.36, 145.23, 136.75 (d,  $J_{\text{C-F}} = 2.4$  Hz), 134.81, 134.63, 134.57 (d,  $J_{\text{C-F}} = 3.5$  Hz), 133.18, 130.20 (d,  $J_{\text{C-F}} = 8.9$  Hz), 127.70 (d,  $J_{\text{C-F}} = 3.2$  Hz), 123.06 (d,  $J_{\text{C-F}} = 12.2$  Hz), 121.57 (d,  $J_{\text{C-F}} = 6.6$  Hz), 116.88 (d,  $J_{\text{C-F}} = 22.5$  Hz), 60.71, 18.43, 14.27; HRMS (ESI-TOF)  $m/z$ :  $[\text{M}+\text{H}]^+$  calcd. for  $\text{C}_{17}\text{H}_{17}\text{FNO}_2^+$ , 286.1238; found 286.1237.

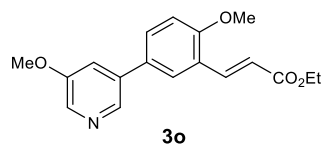

ethyl (*E*)-3-(2-methoxy-5-(5-methoxypyridin-3-yl)phenyl)acrylate **3o**. Pale yellow solid, 26.6 mg. Yield: 85%. TLC (Hexane:EtOAc, 50:50 v/v):  $R_F = 0.30$ ;  $^1\text{H}$  NMR (600 MHz,  $\text{CDCl}_3$ ):  $\delta$  8.41 (d,  $J = 1.8$  Hz, 1H), 8.27 (d,  $J = 3.0$  Hz, 1H), 8.00 (d,  $J = 16.2$  Hz, 1H), 7.69 (d,  $J = 2.4$  Hz, 1H), 7.55 (dd,  $J = 9.0, 2.4$  Hz, 1H), 7.31 (dd,  $J = 3.0, 1.8$  Hz, 1H), 7.01 (d,  $J = 9.0$  Hz, 1H), 6.60 (d,  $J = 16.2$  Hz, 1H), 4.27 (q,  $J = 7.2$  Hz, 2H), 3.93 (s, 3H), 3.92 (s, 3H), 1.34 (t,  $J = 7.2$  Hz, 3H);  $^{13}\text{C}$  NMR (151 MHz,  $\text{CDCl}_3$ ):  $\delta$  167.24, 158.36, 155.73, 140.29, 139.49, 136.33, 135.83, 130.17, 129.97, 127.62, 124.00, 119.60, 118.55, 111.70, 60.42, 55.69, 55.62, 14.32; HRMS (ESI-TOF)  $m/z$ :  $[\text{M}+\text{H}]^+$  calcd. for  $\text{C}_{18}\text{H}_{20}\text{NO}_4^+$ , 314.1387; found 314.1387.

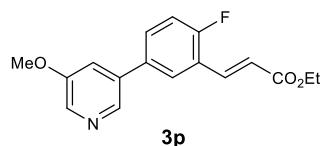

ethyl (*E*)-3-(2-fluoro-5-(5-methoxypyridin-3-yl)phenyl)acrylate **3p**. Pale yellow solid, 19.0 mg. Yield: 63%. TLC (Hexane:EtOAc, 50:50 v/v): RF = 0.40; <sup>1</sup>H NMR (600 MHz, CDCl<sub>3</sub>): δ 8.41 (s, 1H), 8.33 (s, 1H), 7.84 (d, *J* = 16.2 Hz, 1H), 7.70 (dd, *J* = 6.8, 2.3 Hz, 1H), 7.56–7.53 (m, 1H), 7.31 (dd, *J* = 2.5, 2.0 Hz, 1H), 7.21 (dd, *J* = 10.1, 8.6 Hz, 1H), 6.61 (d, *J* = 16.2 Hz, 1H), 4.29 (q, *J* = 7.1 Hz, 2H), 3.93 (s, 3H), 1.35 (t, *J* = 7.1 Hz, 3H); <sup>13</sup>C NMR (151 MHz, CDCl<sub>3</sub>): δ 166.58, 161.29 (d, *J*<sub>C-F</sub> = 255.8 Hz), 155.78, 140.40, 136.71 (d, *J*<sub>C-F</sub> = 1.5 Hz), 136.49, 135.82, 134.34 (d, *J*<sub>C-F</sub> = 3.5 Hz), 130.33 (d, *J*<sub>C-F</sub> = 8.9 Hz), 127.88 (d, *J*<sub>C-F</sub> = 3.0 Hz), 123.12 (d, *J*<sub>C-F</sub> = 12.2 Hz), 121.71 (d, *J*<sub>C-F</sub> = 6.6 Hz), 118.94, 116.94 (d, *J*<sub>C-F</sub> = 22.5 Hz), 60.74, 55.70, 14.29; HRMS (ESI-TOF) *m/z*: [M+H]<sup>+</sup> calcd. for C<sub>17</sub>H<sub>17</sub>FNO<sub>3</sub><sup>+</sup>, 302.1187; found 302.1187.

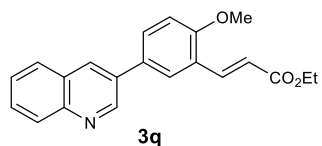

ethyl (*E*)-3-(2-methoxy-5-(quinolin-3-yl)phenyl)acrylate **3q**. Pale yellow solid, 24.7 mg. Yield: 74%. TLC (Hexane:EtOAc, 50:50 v/v): RF = 0.44; <sup>1</sup>H NMR (600 MHz, CDCl<sub>3</sub>): δ 9.14 (d, *J* = 2.4 Hz, 1H), 8.24 (d, *J* = 2.4 Hz, 1H), 8.13 (d, *J* = 8.4 Hz, 1H), 8.05 (d, *J* = 16.2 Hz, 1H), 7.86 (d, *J* = 8.4 Hz, 1H), 7.83 (d, *J* = 2.4 Hz, 1H), 7.72–7.69 (m, 1H), 7.68 (dd, *J* = 8.4, 2.4 Hz, 1H), 7.57 (ddd, *J* = 7.8, 7.2, 0.6 Hz, 1H), 7.06 (d, *J* = 8.4 Hz, 1H), 6.64 (d, *J* = 16.2 Hz, 1H), 4.28 (q, *J* = 7.2 Hz, 2H), 3.95 (s, 3H), 1.35 (t, *J* = 7.2 Hz, 3H); <sup>13</sup>C NMR (151 MHz, CDCl<sub>3</sub>): δ 167.26, 158.33, 149.52, 147.14, 139.53, 132.80, 132.53, 130.36, 130.11, 129.26, 129.18, 127.96, 127.85, 127.77, 127.04, 124.18, 119.66, 111.84, 60.45, 55.72, 14.34; HRMS (ESI-TOF) *m/z*: [M+H]<sup>+</sup> calcd. for C<sub>21</sub>H<sub>20</sub>NO<sub>3</sub><sup>+</sup>, 334.1438; found 334.1436.

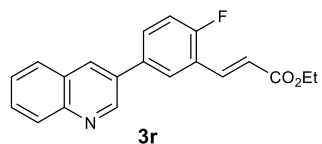

ethyl (*E*)-3-(2-fluoro-5-(quinolin-3-yl)phenyl)acrylate **3r**. Pale yellow solid, 17.7 mg. Yield: 55%. TLC (Hexane:EtOAc, 50:50 v/v): RF = 0.65; <sup>1</sup>H NMR (600 MHz, CDCl<sub>3</sub>): δ 9.13 (d, *J* =

2.2 Hz, 1H), 8.27 (d,  $J = 2.2$  Hz, 1H), 8.15 (d,  $J = 8.5$  Hz, 1H), 7.89 (d,  $J = 7.3$  Hz, 1H), 7.88 (d,  $J = 16.2$  Hz, 1H), 7.84 (dd,  $J = 6.8, 2.3$  Hz, 1H), 7.75 (ddd,  $J = 8.3, 6.9, 1.4$  Hz, 1H), 7.70–7.67 (m, 1H), 7.61 (ddd,  $J = 8.0, 6.9, 1.0$  Hz, 1H), 7.27 (dd,  $J = 10.1, 8.5$  Hz, 1H), 6.66 (d,  $J = 16.2$  Hz, 1H), 4.30 (q,  $J = 7.1$  Hz, 2H), 1.36 (t,  $J = 7.1$  Hz, 3H);  $^{13}\text{C}$  NMR (151 MHz,  $\text{CDCl}_3$ ):  $\delta$  166.60, 161.29 (d,  $J_{\text{C-F}} = 256.1$  Hz), 149.36, 147.43, 136.76 (d,  $J_{\text{C-F}} = 2.4$  Hz), 134.55 (d,  $J_{\text{C-F}} = 3.5$  Hz), 133.28, 132.27, 130.47 (d,  $J_{\text{C-F}} = 8.9$  Hz), 129.72, 129.27, 128.04 (d,  $J_{\text{C-F}} = 3.5$  Hz), 127.96, 127.82, 127.28, 123.28 (d,  $J_{\text{C-F}} = 12.4$  Hz), 121.76 (d,  $J_{\text{C-F}} = 6.6$  Hz), 117.08 (d,  $J_{\text{C-F}} = 22.5$  Hz), 60.76, 14.30; HRMS (ESI-TOF)  $m/z$ :  $[\text{M}+\text{H}]^+$  calcd. for  $\text{C}_{20}\text{H}_{17}\text{FNO}_2^+$ , 322.1238; found 322.1239.

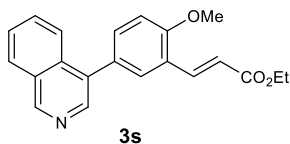

ethyl (*E*)-3-(5-(isoquinolin-4-yl)-2-methoxyphenyl)acrylate **3s**. Colorless liquid, 27.7 mg. Yield: 83%. TLC (Hexane:EtOAc, 50:50 v/v):  $R_F = 0.35$ ;  $^1\text{H}$  NMR (600 MHz,  $\text{CDCl}_3$ ):  $\delta$  9.24 (s, 1H), 8.46 (s, 1H), 8.05 (d,  $J = 16.2$  Hz, 1H), 8.04 (d,  $J = 7.8$  Hz, 1H), 7.88 (d,  $J = 8.5$  Hz, 1H), 7.68 (t,  $J = 6.9$  Hz, 1H), 7.65 (d,  $J = 2.2$  Hz, 1H), 7.63 (t,  $J = 7.5$  Hz, 1H), 7.49 (dd,  $J = 8.5, 2.2$  Hz, 1H), 7.08 (d,  $J = 8.5$  Hz, 1H), 6.57 (d,  $J = 16.2$  Hz, 1H), 4.25 (q,  $J = 7.1$  Hz, 2H), 3.98 (s, 3H), 1.32 (t,  $J = 7.1$  Hz, 3H);  $^{13}\text{C}$  NMR (151 MHz,  $\text{CDCl}_3$ ):  $\delta$  167.30, 158.09, 151.93, 142.75, 139.52, 134.22, 132.83, 132.26, 130.65, 130.45, 129.32, 128.40, 127.93, 127.20, 124.52, 123.63, 119.52, 111.39, 60.39, 55.70, 14.31; HRMS (ESI-TOF)  $m/z$ :  $[\text{M}+\text{H}]^+$  calcd. for  $\text{C}_{21}\text{H}_{20}\text{NO}_3^+$ , 334.1438; found 334.1440.

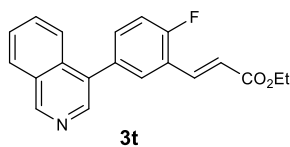

ethyl (*E*)-3-(2-fluoro-5-(isoquinolin-4-yl)phenyl)acrylate **3t**. Colorless oil, 16.7 mg. Yield: 52%. TLC (Hexane:EtOAc, 50:50 v/v):  $R_F = 0.44$ ;  $^1\text{H}$  NMR (600 MHz,  $\text{CDCl}_3$ ):  $\delta$  9.29 (s, 1H), 8.47 (s, 1H), 8.06 (d,  $J = 8.2$  Hz, 1H), 7.87 (d,  $J = 16.2$  Hz, 1H), 7.82 (d,  $J = 8.4$  Hz, 1H), 7.70 (ddd,  $J = 8.3, 6.8, 1.4$  Hz, 1H), 7.68–7.65 (m, 2H), 7.50–7.48 (m, 1H), 7.27 (dd,  $J = 10.3, 8.4$  Hz, 1H), 6.59 (d,  $J = 16.2$  Hz, 1H), 4.27 (q,  $J = 7.1$  Hz, 2H), 1.33 (t,  $J = 7.1$  Hz, 3H);  $^{13}\text{C}$  NMR (151 MHz,

CDCl<sub>3</sub>):  $\delta$  166.61, 161.06 (d,  $J_{C-F}$  = 256.8 Hz), 152.48, 142.81, 136.72 (d,  $J_{C-F}$  = 1.7 Hz), 134.02, 133.47 (d,  $J_{C-F}$  = 3.6 Hz), 133.09 (d,  $J_{C-F}$  = 8.9 Hz), 131.61, 130.92, 130.55 (d,  $J_{C-F}$  = 2.7 Hz), 128.41, 128.05, 127.40, 124.24, 122.81 (d,  $J_{C-F}$  = 12.2 Hz), 121.62 (d,  $J_{C-F}$  = 6.6 Hz), 116.56 (d,  $J_{C-F}$  = 22.3 Hz), 60.70, 14.27; HRMS (ESI-TOF)  $m/z$ :  $[M+H]^+$  calcd. for C<sub>20</sub>H<sub>17</sub>FNO<sub>2</sub><sup>+</sup>, 322.1238; found 322.1239.

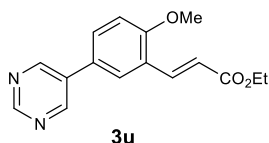

ethyl (*E*)-3-(2-methoxy-5-(pyrimidin-5-yl)phenyl)acrylate **3u**. White solid, 20.2 mg. Yield: 71%. TLC (Hexane:EtOAc, 50:50 v/v): RF = 0.26; <sup>1</sup>H NMR (600 MHz, CDCl<sub>3</sub>):  $\delta$  9.17 (s, 1H), 8.91 (s, 2H), 7.99 (d,  $J$  = 16.2 Hz, 1H), 7.69 (d,  $J$  = 2.4 Hz, 1H), 7.55 (dd,  $J$  = 8.4, 2.4 Hz, 1H), 7.06 (d,  $J$  = 8.4 Hz, 1H), 6.60 (d,  $J$  = 16.2 Hz, 1H), 4.27 (q,  $J$  = 7.2 Hz, 2H), 3.95 (s, 3H), 1.34 (t,  $J$  = 7.2 Hz, 3H); <sup>13</sup>C NMR (151 MHz, CDCl<sub>3</sub>):  $\delta$  167.08, 158.88, 157.19, 154.44, 139.07, 133.44, 129.65, 127.34, 126.70, 124.51, 120.10, 112.07, 60.50, 55.75, 14.31; HRMS (ESI-TOF)  $m/z$ :  $[M+H]^+$  calcd. for C<sub>16</sub>H<sub>17</sub>N<sub>2</sub>O<sub>3</sub><sup>+</sup>, 285.1234; found 285.1235.

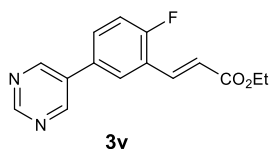

ethyl (*E*)-3-(2-fluoro-5-(pyrimidin-5-yl)phenyl)acrylate **3v**. Pale yellow solid, 10.9 mg. Yield: 40%. TLC (Hexane:EtOAc, 50:50 v/v): RF = 0.37; <sup>1</sup>H NMR (600 MHz, CDCl<sub>3</sub>):  $\delta$  9.23 (s, 1H), 8.93 (s, 2H), 7.84 (d,  $J$  = 16.2 Hz, 1H), 7.71 (dd,  $J$  = 6.6, 2.4 Hz, 1H), 7.57–7.54 (m, 1H), 7.29–7.27 (m, 1H), 6.63 (d,  $J$  = 16.2 Hz, 1H), 4.29 (q,  $J$  = 7.2 Hz, 2H), 1.34 (t,  $J$  = 7.2 Hz, 3H); <sup>13</sup>C NMR (151 MHz, CDCl<sub>3</sub>):  $\delta$  166.41, 161.71 (d,  $J_{C-F}$  = 256.7 Hz), 157.82, 154.76, 136.25 (d,  $J_{C-F}$  = 1.5 Hz), 132.98, 130.98 (d,  $J_{C-F}$  = 3.5 Hz), 130.02 (d,  $J_{C-F}$  = 9.2 Hz), 127.74 (d,  $J_{C-F}$  = 3.3 Hz), 123.70 (d,  $J_{C-F}$  = 12.7 Hz), 122.26 (d,  $J_{C-F}$  = 6.6 Hz), 117.48 (d,  $J_{C-F}$  = 22.8 Hz), 60.82, 14.27; HRMS (ESI-TOF)  $m/z$ :  $[M+H]^+$  calcd. for C<sub>15</sub>H<sub>14</sub>FN<sub>2</sub>O<sub>2</sub><sup>+</sup>, 273.1034; found 273.1036.

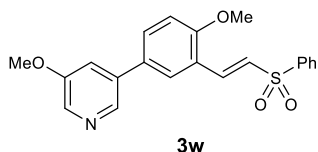

(*E*)-3-methoxy-5-(4-methoxy-3-(2-(phenylsulfonyl)vinyl)phenyl)pyridine **3w**. Pale yellow solid, 31.6 mg. Yield: 83%. TLC (EtOAc): RF = 0.58; <sup>1</sup>H NMR (600 MHz, CDCl<sub>3</sub>): δ 8.38 (d, *J* = 1.8 Hz, 1H), 8.28 (d, *J* = 3.0 Hz, 1H), 7.98–7.96 (m, 2H), 7.94 (d, *J* = 15.6 Hz, 1H), 7.62–7.58 (m, 3H), 7.56–7.53 (m, 2H), 7.29 (dd, *J* = 2.7, 2.0 Hz, 1H), 7.15 (d, *J* = 15.6 Hz, 1H), 7.03 (d, *J* = 8.6 Hz, 1H), 3.94 (s, 3H), 3.92 (s, 3H); <sup>13</sup>C NMR (151 MHz, CDCl<sub>3</sub>): δ 158.81, 155.75, 140.92, 140.20, 137.94, 136.09, 135.91, 133.21, 131.03, 130.38, 129.43, 129.26, 128.73, 127.64, 121.77, 118.50, 111.89, 55.79, 55.67; HRMS (ESI-TOF) *m/z*: [M+H]<sup>+</sup> calcd. for C<sub>21</sub>H<sub>20</sub>NO<sub>4</sub>S<sup>+</sup>, 382.1108; found 382.1105.

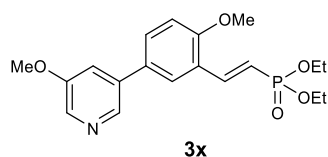

diethyl (*E*)-2-methoxy-5-(5-methoxypyridin-3-yl)styrylphosphonate **3x**. Colorless liquid, 36.3 mg. Yield: 96%. TLC (EtOAc): RF = 0.21; <sup>1</sup>H NMR (600 MHz, CDCl<sub>3</sub>): δ 8.42 (s, 1H), 8.28 (d, *J* = 2.4 Hz, 1H), 7.83 (dd, *J* = 23.6, 17.8 Hz, 1H), 7.68 (d, *J* = 2.4 Hz, 1H), 7.56 (dd, *J* = 8.5, 2.4 Hz, 1H), 7.32 (dd, *J* = 2.6, 2.4 Hz, 1H), 7.01 (d, *J* = 8.5 Hz, 1H), 6.43 (dd, *J* = 19.1, 17.8 Hz, 1H), 4.18–4.12 (m, 4H), 3.93 (s, 3H), 3.92 (s, 3H), 1.36 (t, *J* = 6.9 Hz, 6H); <sup>13</sup>C NMR (151 MHz, CDCl<sub>3</sub>): δ 158.17, 155.77, 143.50 (d, *J*<sub>C-P</sub> = 7.9 Hz), 140.28, 136.39, 135.83, 130.13, 129.99, 127.30, 124.35 (d, *J*<sub>C-P</sub> = 23.3 Hz), 118.62, 115.32 (d, *J*<sub>C-P</sub> = 190.1 Hz), 111.76, 61.83 (d, *J*<sub>C-P</sub> = 5.6 Hz), 55.68, 55.67, 16.41 (d, *J*<sub>C-P</sub> = 6.5 Hz); HRMS (ESI-TOF) *m/z*: [M+H]<sup>+</sup> calcd. for C<sub>19</sub>H<sub>25</sub>NO<sub>5</sub>P<sup>+</sup>, 378.1465; found 378.1467.

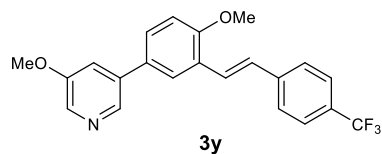

(*E*)-3-methoxy-5-(4-methoxy-3-(4-(trifluoromethyl)styryl)phenyl)pyridine **3y**. Pale yellow solid, 19.3 mg. Yield: 50%. TLC (Hexane:EtOAc, 50:50 v/v): RF = 0.41; <sup>1</sup>H NMR (600 MHz, CDCl<sub>3</sub>): δ 8.47 (d, *J* = 1.8 Hz, 1H), 8.29 (d, *J* = 2.4 Hz, 1H), 7.78 (d, *J* = 1.8 Hz, 1H), 7.65–7.57 (m, 5H), 7.49 (dd, *J* = 8.4, 2.4 Hz, 1H), 7.37 (dd, *J* = 2.4, 1.8 Hz, 1H), 7.21 (d, *J* = 16.2 Hz, 1H), 7.02 (d, *J* = 8.4 Hz, 1H), 3.96 (s, 3H), 3.94 (s, 3H); <sup>13</sup>C NMR (151 MHz, CDCl<sub>3</sub>): δ 157.28, 155.76, 141.14, 140.50, 136.89, 135.49, 130.27, 129.18 (q, *J*<sub>C-F</sub> = 32.3 Hz), 128.26, 128.06, 126.67, 126.32,

125.66, 125.57 (q,  $J_{C-F} = 3.5$  Hz), 125.53, 124.22 (q,  $J_{C-F} = 271.7$  Hz), 118.91, 111.51, 55.74, 55.68; HRMS (ESI-TOF)  $m/z$ :  $[M+H]^+$  calcd. for  $C_{22}H_{19}F_3NO_2^+$ , 386.1362; found 386.1365.

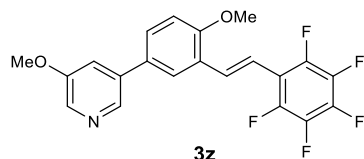

(*E*)-3-methoxy-5-(4-methoxy-3-(2-(perfluorophenyl)vinyl)phenyl)pyridine **3z**. Pale yellow solid, 35.1 mg. Yield: 86%. TLC (Hexane:EtOAc, 50:50 v/v):  $R_F = 0.37$ ;  $^1H$  NMR (600 MHz,  $CDCl_3$ ):  $\delta$  8.45 (d,  $J = 1.8$  Hz, 1H), 8.28 (d,  $J = 2.7$  Hz, 1H), 7.76 (d,  $J = 16.8$  Hz, 1H), 7.72 (d,  $J = 2.3$  Hz, 1H), 7.51 (dd,  $J = 8.5, 2.3$  Hz, 1H), 7.35 (dd,  $J = 2.7, 1.8$  Hz, 1H), 7.06 (d,  $J = 16.8$  Hz, 1H), 7.01 (d,  $J = 8.5$  Hz, 1H), 3.96 (s, 3H), 3.94 (s, 3H);  $^{13}C$  NMR (151 MHz,  $CDCl_3$ ):  $\delta$  157.45, 155.74, 140.44, 136.68, 135.56, 132.07 (m), 130.32, 128.74, 126.14, 125.81, 118.85, 113.89, 111.55, 55.75, 55.65; HRMS (ESI-TOF)  $m/z$ :  $[M+H]^+$  calcd. for  $C_{21}H_{15}F_5NO_2^+$ , 408.1017; found 408.1009. The carbon resonances corresponding to the pentafluorobenzene ( $C_6F_5$ ) in this compound appear as a complex series of multiplets between 146 ppm to 112 ppm as a result of  $^{13}C/^{19}F$  coupling. Due to the complexities of the system, the peaks are not listed. HRMS were used to confirm the presence of this ring system.

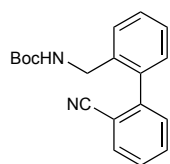

*tert*-butyl ((2'-cyano-[1,1'-biphenyl]-2-yl)methyl)carbamate **S2**. White solid. TLC (Hexanes:EtOAc, 80:20 v/v):  $R_F = 0.23$ ;  $^1H$  NMR (600 MHz,  $CDCl_3$ ):  $\delta$  7.75 (d,  $J = 7.8$  Hz, 1H), 7.64 (td,  $J = 7.6, 1.3$  Hz, 1H), 7.49–7.46 (m, 2H), 7.44 (td,  $J = 7.4, 1.4$  Hz, 1H), 7.40 (d,  $J = 7.8$  Hz, 1H), 7.37 (td,  $J = 7.5, 1.4$  Hz, 1H), 7.22 (dd,  $J = 7.6, 1.3$  Hz, 1H), 4.78–4.43 (m, 1H), 4.26–4.07 (m, 2H), 1.40 (s, 9H);  $^{13}C$  NMR (151 MHz,  $CDCl_3$ ):  $\delta$  155.57, 144.60, 137.50, 136.50,

132.85, 132.63, 130.49, 129.93, 129.21, 128.59, 127.93, 127.52, 118.09, 112.74, 79.44, 42.18, 28.37; HRMS (ESI-TOF)  $m/z$ :  $[M+H]^+$  calcd. for  $C_{19}H_{21}N_2O_2^+$ , 309.1598; found 309.1593.

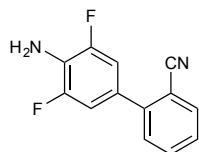

**S4**

4'-amino-3',5'-difluoro-[1,1'-biphenyl]-2-carbonitrile **S4**. White solid, 0.21 g. Yield: 46 %. TLC (Hexanes:EtOAc, 80:20 v/v): RF = 0.28;  $^1H$  NMR (600 MHz,  $CDCl_3$ ):  $\delta$  7.74 (dd,  $J = 7.8, 1.2$  Hz, 1H), 7.62 (td,  $J = 7.8, 1.2$  Hz, 1H), 7.44 (d,  $J = 7.8$  Hz, 1H), 7.42 (td,  $J = 7.8, 1.2$  Hz, 1H), 7.11–7.05 (m, 2H), 3.91 (br, 2H);  $^{13}C$  NMR (151 MHz,  $CDCl_3$ ):  $\delta$  151.63 (dd,  $J_{C-F} = 241.4, 8.6$  Hz), 143.56 (t,  $J_{C-F} = 2.3$  Hz), 133.89, 132.91, 129.76, 127.56, 126.63 (t,  $J_{C-F} = 8.8$  Hz), 124.66 (t,  $J_{C-F} = 16.3$  Hz), 118.50, 111.63 (dd,  $J_{C-F} = 16.9, 6.5$  Hz), 110.98; HRMS (ESI-TOF)  $m/z$ :  $[M+H]^+$  calcd. for  $C_{13}H_9F_2N_2^+$ , 231.0728; found 231.0738.

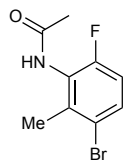

*N*-(3-bromo-6-fluoro-2-methylphenyl)acetamide. White solid. TLC (Hexanes:EtOAc, 50:50 v/v): RF = 0.39;  $^1H$  NMR (600 MHz,  $DMSO-d_6$ ):  $\delta$  9.66 (br, 1H), 7.56 (dd,  $J = 8.4, 4.8$  Hz, 1H), 7.12 (dd,  $J = 9.6, 8.4$  Hz, 1H), 2.33 (s, 3H), 2.07 (s, 3H);  $^{13}C$  NMR (151 MHz,  $DMSO-d_6$ ):  $\delta$  161.38, 156.97 (d,  $J_{C-F} = 246.4$  Hz), 137.18, 131.00 (d,  $J_{C-F} = 8.3$  Hz), 125.76 (d,  $J_{C-F} = 14.6$  Hz), 118.65 (d,  $J_{C-F} = 3.0$  Hz), 114.74 (d,  $J_{C-F} = 22.5$  Hz), 22.48, 18.57 (dd,  $J_{C-F} = 2.1$  Hz); HRMS (ESI-TOF)  $m/z$ :  $[M+H]^+$  calcd. for  $C_9H_{10}BrFNO^+$ , 245.9924; found 245.9932.

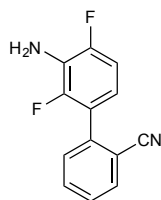

**S5**

3'-amino-2',4'-difluoro-[1,1'-biphenyl]-2-carbonitrile **S5**. Pale yellow solid, 0.093 g. Yield: 20 %. TLC (Hexanes:EtOAc, 80:20 v/v): RF = 0.28;  $^1\text{H}$  NMR (600 MHz,  $\text{CDCl}_3$ ):  $\delta$  7.77-7.76 (m, 1H), 7.64 (td,  $J = 7.8, 1.2$  Hz, 1H), 7.48 (td,  $J = 7.8, 1.2$  Hz, 1H), 7.47 (d,  $J = 7.8$  Hz, 1H), 6.93 (ddd,  $J = 10.0, 8.5, 1.8$  Hz, 1H), 6.70 (td,  $J = 7.8, 6.0$  Hz, 1H), 3.87 (br, 2H);  $^{13}\text{C}$  NMR (151 MHz,  $\text{CDCl}_3$ ):  $\delta$  152.27 (dd,  $J_{\text{C-F}} = 242.5, 6.8$  Hz), 148.76 (dd,  $J_{\text{C-F}} = 242.2, 7.2$  Hz), 139.29, 133.23, 132.55, 130.92 (d,  $J_{\text{C-F}} = 1.7$  Hz), 128.16, 124.54 (dd,  $J_{\text{C-F}} = 16.5, 16.5$  Hz), 121.89 (dd,  $J_{\text{C-F}} = 13.3, 3.5$  Hz), 118.07 (dd,  $J_{\text{C-F}} = 8.6, 3.0$  Hz), 118.05, 112.86, 111.02 (dd,  $J_{\text{C-F}} = 19.0, 3.3$  Hz); HRMS (ESI-TOF)  $m/z$ :  $[\text{M}+\text{H}]^+$  calcd. for  $\text{C}_{13}\text{H}_9\text{F}_2\text{N}_2^+$ , 231.0728; found 231.0734.

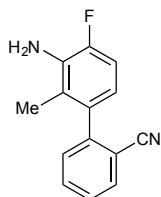

**S6**

3'-amino-4'-fluoro-2'-methyl-[1,1'-biphenyl]-2-carbonitrile **S6**. Pale yellow solid, 1.79 g. Yield: 39 %. TLC (Hexanes:EtOAc, 80:20 v/v): RF = 0.25;  $^1\text{H}$  NMR (600 MHz,  $\text{CDCl}_3$ ):  $\delta$  7.73 (ddd,  $J = 7.8, 1.2, 0.6$  Hz, 1H), 7.61 (td,  $J = 7.8, 1.2$  Hz, 1H), 7.44 (td,  $J = 7.8, 1.2$  Hz, 1H), 7.34 (ddd,  $J = 7.8, 1.2, 0.6$  Hz, 1H), 6.95 (dd,  $J = 10.8, 8.4$  Hz, 1H), 6.59 (dd,  $J = 8.4, 5.4$  Hz, 1H), 3.79 (br, 2H), 2.00 (s, 3H);  $^{13}\text{C}$  NMR (151 MHz,  $\text{CDCl}_3$ ):  $\delta$  151.53 (d,  $J_{\text{C-F}} = 239.6$  Hz), 145.60, 134.36 (d,  $J_{\text{C-F}} = 3.2$  Hz), 133.23 (d,  $J_{\text{C-F}} = 12.2$  Hz), 133.72, 132.41, 130.77, 127.51, 122.76 (d,  $J_{\text{C-F}} = 3.8$  Hz), 119.21 (d,  $J_{\text{C-F}} = 7.7$  Hz), 118.12, 113.18, 112.34 (d,  $J_{\text{C-F}} = 19.5$  Hz), 14.38 (d,  $J_{\text{C-F}} = 2.7$  Hz); HRMS (ESI-TOF)  $m/z$ :  $[\text{M}+\text{H}]^+$  calcd. for  $\text{C}_{14}\text{H}_{12}\text{FN}_2^+$ , 227.0979; found 227.0983.

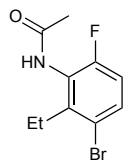

**S8**

*N*-(3-bromo-2-ethyl-6-fluorophenyl)acetamide **S8**. White solid, 1.55 g. Yield: 44 %. TLC (Hexanes:EtOAc, 50:50 v/v): RF = 0.43; rotameric mixture.  $^1\text{H}$  NMR (600 MHz,  $\text{CDCl}_3$ ):  $\delta$  7.53–7.44 (m, 1H), 6.98–6.94 (m, 1H), 6.86 (t,  $J = 8.8$  Hz, 1H), 2.84–2.68 (m, 2H), 2.20–1.87 (m, 3H),



1.12–1.07 (m, 3H);  $^{13}\text{C}$  NMR (151 MHz,  $\text{CDCl}_3$ ):  $\delta$  169.49, 157.70 (d,  $J_{\text{C-F}} = 249.3$  Hz), 143.30, 132.70 (d,  $J_{\text{C-F}} = 8.0$  Hz), 123.82 (d,  $J_{\text{C-F}} = 14.1$  Hz), 118.68 (d,  $J_{\text{C-F}} = 3.1$  Hz), 114.73 (d,  $J_{\text{C-F}} = 22.1$  Hz), 25.71, 23.08, 13.14; HRMS (ESI-TOF)  $m/z$ :  $[\text{M}+\text{H}]^+$  calcd. for  $\text{C}_{10}\text{H}_{12}\text{BrFNO}^+$ , 260.0081; found 260.0088.

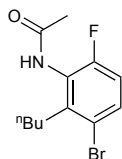

**S9**

*N*-(3-bromo-2-butyl-6-fluorophenyl)acetamide **S9**. White solid, 0.36 g. Yield: 31 %. TLC (Hexanes:EtOAc, 50:50 v/v):  $R_F = 0.54$ ; rotameric mixture.  $^1\text{H}$  NMR (600 MHz,  $\text{CDCl}_3$ ):  $\delta$  7.52–7.50 (m, 1H), 6.93–6.89 (m, 1H), 6.77–6.68 (m, 1H), 2.79–2.71 (m, 2H), 2.22–1.87 (m, 3H), 1.51–1.37 (m, 4H), 0.95 (t,  $J = 7.3$  Hz, 3H);  $^{13}\text{C}$  NMR (151 MHz,  $\text{CDCl}_3$ ):  $\delta$  169.17, 157.67 (d,  $J_{\text{C-F}} = 249.9$  Hz), 142.19, 132.70 (d,  $J_{\text{C-F}} = 8.0$  Hz), 123.92 (d,  $J_{\text{C-F}} = 13.9$  Hz), 119.00 (d,  $J_{\text{C-F}} = 2.9$  Hz), 114.74 (d,  $J_{\text{C-F}} = 22.2$  Hz), 32.01 (d,  $J_{\text{C-F}} = 1.4$  Hz), 30.94, 23.14, 22.80, 13.81; HRMS (ESI-TOF)  $m/z$ :  $[\text{M}+\text{H}]^+$  calcd. for  $\text{C}_{12}\text{H}_{16}\text{BrFNO}^+$ , 288.0394; found 288.0404.

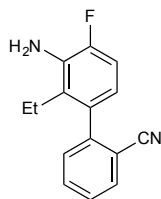

**S10**

3'-amino-2'-ethyl-4'-fluoro-[1,1'-biphenyl]-2-carbonitrile **S10**. Pale yellow solid, 0.78 g. Yield: 65 %. TLC (Hexanes:EtOAc, 80:20 v/v):  $R_F = 0.27$ ;  $^1\text{H}$  NMR (600 MHz,  $\text{CDCl}_3$ ):  $\delta$  7.73 (ddd,  $J = 7.8, 1.2, 0.6$  Hz, 1H), 7.61 (td,  $J = 7.8, 1.2$  Hz, 1H), 7.45 (td,  $J = 7.8, 1.2$  Hz, 1H), 7.35 (ddd,  $J = 7.8, 1.2, 0.6$  Hz, 1H), 6.94 (dd,  $J = 10.8, 8.4$  Hz, 1H), 6.55 (dd,  $J = 8.4, 5.4$  Hz, 1H), 3.82 (br, 2H), 2.46–2.40 (m, 1H), 2.36–2.30 (m, 1H), 1.03 (t,  $J = 7.8$  Hz, 3H);  $^{13}\text{C}$  NMR (151 MHz,  $\text{CDCl}_3$ ):  $\delta$  151.91 (d,  $J_{\text{C-F}} = 239.8$  Hz), 145.65, 134.05 (d,  $J_{\text{C-F}} = 3.2$  Hz), 132.77 (d,  $J_{\text{C-F}} = 12.2$  Hz), 132.69, 132.13, 130.63, 128.49 (d,  $J_{\text{C-F}} = 3.3$  Hz), 127.58, 119.30 (d,  $J_{\text{C-F}} = 7.9$  Hz), 118.02, 113.32, 112.42 (d,  $J_{\text{C-F}} = 19.3$  Hz), 21.70 (d,  $J_{\text{C-F}} = 2.7$  Hz), 12.73; HRMS (ESI-TOF)  $m/z$ :  $[\text{M}+\text{H}]^+$  calcd. for  $\text{C}_{15}\text{H}_{14}\text{FN}_2^+$ , 241.1136; found 241.1143.

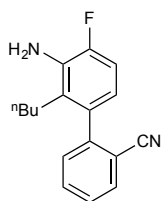

**S11**

3'-amino-2'-butyl-4'-fluoro-[1,1'-biphenyl]-2-carbonitrile **S11**. Pale yellow oil, 0.18 g. Yield: 57 %. TLC (Hexanes:EtOAc, 80:20 v/v): RF = 0.35;  $^1\text{H}$  NMR (600 MHz,  $\text{CDCl}_3$ ):  $\delta$  7.73 (ddd,  $J = 7.8, 1.2, 0.6$  Hz, 1H), 7.61 (td,  $J = 7.8, 1.2$  Hz, 1H), 7.45 (td,  $J = 7.8, 1.2$  Hz, 1H), 7.35 (ddd,  $J = 7.8, 1.2, 0.6$  Hz, 1H), 6.94 (dd,  $J = 10.8, 8.4$  Hz, 1H), 6.55 (dd,  $J = 8.4, 5.4$  Hz, 1H), 3.80 (br, 2H), 2.44–2.39 (m, 1H), 2.33–2.27 (m, 1H), 1.49–1.41 (m, 1H), 1.37–1.30 (m, 1H), 1.17 (sextet,  $J = 7.2$  Hz, 2H), 0.74 (t,  $J = 7.2$  Hz, 3H);  $^{13}\text{C}$  NMR (151 MHz,  $\text{CDCl}_3$ ):  $\delta$  151.91 (d,  $J_{\text{C-F}} = 239.8$  Hz), 145.70, 134.29 (d,  $J_{\text{C-F}} = 3.2$  Hz), 132.90 (d,  $J_{\text{C-F}} = 12.2$  Hz), 132.67, 132.08, 130.78, 127.53, 127.40 (d,  $J_{\text{C-F}} = 3.3$  Hz), 119.37 (d,  $J_{\text{C-F}} = 7.7$  Hz), 118.03, 113.39, 112.40 (d,  $J_{\text{C-F}} = 19.5$  Hz), 30.25, 28.14 (d,  $J_{\text{C-F}} = 2.6$  Hz), 22.70, 13.59; HRMS (ESI-TOF)  $m/z$ :  $[\text{M}+\text{H}]^+$  calcd. for  $\text{C}_{17}\text{H}_{18}\text{FN}_2^+$ , 269.1449; found 269.1459.

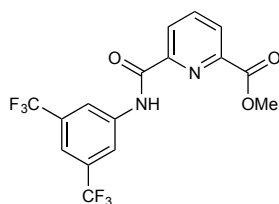

**S12**

methyl 6-((3,5-bis(trifluoromethyl)phenyl)carbamoyl)picolinate **S12**. White solid, 1.93 g. Yield: 25 %. TLC (Hexanes:EtOAc, 80:20 v/v): RF = 0.13;  $^1\text{H}$  NMR (600 MHz,  $\text{CDCl}_3$ ):  $\delta$  10.38 (br, 1H), 8.49 (dd,  $J = 7.8, 1.1$  Hz, 1H), 8.34 (s, 2H), 8.32 (dd,  $J = 7.8, 1.1$  Hz, 1H), 8.12 (t,  $J = 7.8$  Hz, 1H), 7.66 (s, 1H), 4.08 (s, 3H);  $^{13}\text{C}$  NMR (151 MHz,  $\text{CDCl}_3$ ):  $\delta$  164.62, 161.74, 149.13, 146.64, 139.22, 138.97, 132.44 (q,  $J_{\text{C-F}} = 33.5$  Hz), 128.11, 125.79, 123.14 (q,  $J_{\text{C-F}} = 272.9$  Hz), 119.79–119.71 (m), 117.84–117.74 (m), 53.17; HRMS (ESI-TOF)  $m/z$ :  $[\text{M}+\text{H}]^+$  calcd. for  $\text{C}_{16}\text{H}_{11}\text{F}_6\text{N}_2\text{O}_3^+$ , 393.0668; found 393.0667.

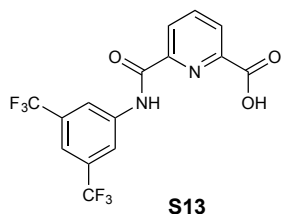

6-((3,5-bis(trifluoromethyl)phenyl)carbamoyl)picolinic acid **S13**. White solid.  $^1\text{H}$  NMR (600 MHz,  $\text{CD}_3\text{CN}$ ):  $\delta$  10.41 (br, 1H), 8.47 (s, 2H), 8.47 (dd,  $J = 7.7, 1.1$  Hz, 1H), 8.36 (dd,  $J = 7.7, 1.1$  Hz, 1H), 8.23 (t,  $J = 7.8$  Hz, 1H), 7.78 (s, 1H);  $^{13}\text{C}$  NMR (151 MHz,  $\text{CD}_3\text{CN}$ ):  $\delta$  164.99, 162.97, 149.57, 146.80, 141.39, 140.71, 132.58 (q,  $J_{\text{C-F}} = 33.2$  Hz), 128.42, 127.59, 124.44 (q,  $J_{\text{C-F}} = 272.1$  Hz), 121.73–121.36 (m), 118.57–118.32 (m); HRMS (ESI-TOF)  $m/z$ :  $[\text{M-H}]^-$  calcd. for  $\text{C}_{15}\text{H}_7\text{F}_6\text{N}_2\text{O}_3^-$ , 377.0366; found 377.0372.

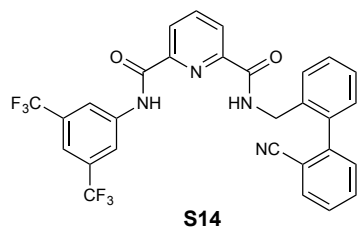

$N_2$ -(3,5-bis(trifluoromethyl)phenyl)- $N_6$ -((2'-cyano-[1,1'-biphenyl]-2-yl)methyl)pyridine-2,6-dicarboxamide **S14**. White solid. TLC (Hexanes:EtOAc, 33:67 v/v): RF = 0.45;  $^1\text{H}$  NMR (600 MHz,  $\text{DMSO-}d_6$ ):  $\delta$  11.18 (br, 1H), 9.68 (t,  $J = 6.2$  Hz, 1H), 8.57 (s, 2H), 8.38–8.35 (m, 1H), 8.28–8.25 (m, 2H), 7.91 (s, 1H), 7.89 (ddd,  $J = 7.7, 1.3, 0.5$  Hz, 1H), 7.74 (td,  $J = 7.7, 1.4$  Hz, 1H), 7.61–7.58 (m, 2H), 7.53 (td,  $J = 7.6, 1.1$  Hz, 1H), 7.49 (td,  $J = 7.6, 1.4$  Hz, 1H), 7.42 (td,  $J = 7.5, 1.3$  Hz, 1H), 7.29 (dd,  $J = 7.6, 1.3$  Hz, 1H), 4.60–4.49 (m, 2H);  $^{13}\text{C}$  NMR (151 MHz,  $\text{DMSO-}d_6$ ):  $\delta$  162.88, 162.51, 148.70, 147.61, 143.87, 139.95, 139.93, 137.19, 136.66, 133.00, 132.95, 130.75 (q,  $J_{\text{C-F}} = 32.9$  Hz), 130.53, 129.89, 128.84, 128.25, 128.14, 127.11, 125.41, 125.15, 123.26 (q,  $J_{\text{C-F}} = 272.8$  Hz), 120.86–120.80 (m), 118.03, 117.26–117.21 (m), 111.90, 40.60; HRMS (ESI-TOF)  $m/z$ :  $[\text{M+H}]^+$  calcd. for  $\text{C}_{29}\text{H}_{19}\text{F}_6\text{N}_4\text{O}_2^+$ , 569.1407; found 569.1407.

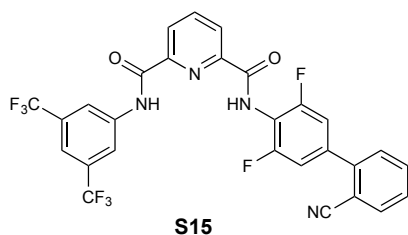

*N*<sub>2</sub>-(3,5-bis(trifluoromethyl)phenyl)-*N*<sub>6</sub>-(2'-cyano-3,5-difluoro-[1,1'-biphenyl]-4-yl)pyridine-2,6-dicarboxamide **S15**. White solid, 0.99 g. Yield: 84 %. TLC (Hexanes:EtOAc, 33:67 v/v): RF = 0.60; <sup>1</sup>H NMR (600 MHz, DMSO-*d*<sub>6</sub>): δ 11.27 (br, 1H), 10.95 (br, 1H), 8.56 (s, 2H), 8.48 (dd, *J* = 7.7, 1.2 Hz, 1H), 8.44 (dd, *J* = 7.8, 1.2 Hz, 1H), 8.37 (t, *J* = 7.7 Hz, 1H), 8.02 (dd, *J* = 7.9, 1.2 Hz, 1H), 7.91 (s, 1H), 7.86 (td, *J* = 7.7, 1.4 Hz, 1H), 7.77 (d, *J* = 7.9 Hz, 1H), 7.67 (td, *J* = 7.7, 1.2 Hz, 1H), 7.63-7.61 (m, 2H); <sup>13</sup>C NMR (151 MHz, DMSO-*d*<sub>6</sub>): δ 162.31, 157.91 (dd, *J*<sub>C-F</sub> = 250.1, 5.7 Hz), 148.05, 147.56, 141.70 (t, *J*<sub>C-F</sub> = 1.8 Hz), 140.48, 139.83, 138.70 (t, *J*<sub>C-F</sub> = 10.0 Hz), 133.86, 133.65, 130.78 (q, *J*<sub>C-F</sub> = 33.1 Hz), 130.19, 129.23, 126.07, 126.04, 123.22 (q, *J*<sub>C-F</sub> = 272.9 Hz), 121.20–121.12 (m), 118.08, 117.48–117.40 (m), 114.28 (t, *J*<sub>C-F</sub> = 17.1 Hz), 112.93 (dd, *J*<sub>C-F</sub> = 20.7, 4.4 Hz), 110.48; HRMS (ESI-TOF) *m/z*: [M+H]<sup>+</sup> calcd. for C<sub>28</sub>H<sub>15</sub>F<sub>8</sub>N<sub>4</sub>O<sub>2</sub><sup>+</sup>, 591.1062; found 591.1062.

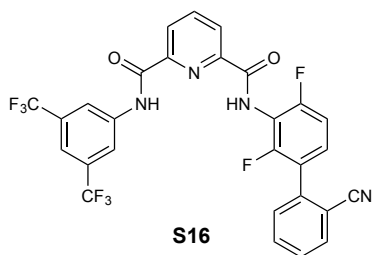

*N*<sub>2</sub>-(3,5-bis(trifluoromethyl)phenyl)-*N*<sub>6</sub>-(2'-cyano-2,4-difluoro-[1,1'-biphenyl]-3-yl)pyridine-2,6-dicarboxamide **S16**. Pale yellow solid, 0.52 g. Yield: 87 %. TLC (Hexanes:EtOAc, 33:67 v/v): RF = 0.55; <sup>1</sup>H NMR (600 MHz, CDCl<sub>3</sub>): δ 10.43 (br, 1H), 9.76 (br, 1H), 8.54 (dd, *J* = 7.8, 1.1 Hz, 1H), 8.50 (dd, *J* = 7.7, 1.1 Hz, 1H), 8.36 (s, 2H), 8.16 (t, *J* = 7.8 Hz, 1H), 7.69 (ddd, *J* = 7.8, 1.4, 0.6 Hz, 1H), 7.62 (td, *J* = 7.7, 1.4 Hz, 1H), 7.55 (s, 1H), 7.46 (td, *J* = 7.7, 1.2 Hz, 1H), 7.38 (d, *J* = 7.8 Hz, 1H), 7.22 (td, *J* = 8.2, 5.6 Hz, 1H), 6.79 (td, *J* = 8.8, 1.4 Hz, 1H); <sup>13</sup>C NMR (151 MHz, CDCl<sub>3</sub>): δ 162.29, 162.15, 158.18 (dd, *J*<sub>C-F</sub> = 254.5, 4.0 Hz), 154.95 (dd, *J*<sub>C-F</sub> = 254.4, 4.7 Hz), 148.12, 147.97, 139.66, 138.76, 138.08, 133.11, 132.99, 132.18 (q, *J*<sub>C-F</sub> = 33.5 Hz), 130.90, 129.67 (dd, *J*<sub>C-F</sub> = 9.6, 3.7 Hz), 128.72, 126.45, 126.16, 122.97 (q, *J*<sub>C-F</sub> = 272.9 Hz), 122.66 (dd, *J*<sub>C-F</sub> = 14.6, 3.7 Hz), 120.42–120.37 (m), 118.39, 118.00–117.90 (m), 113.91 (t, *J*<sub>C-F</sub> = 16.8 Hz), 112.36, 111.74 (dd, *J*<sub>C-F</sub> = 20.4, 3.7 Hz); HRMS (ESI-TOF) *m/z*: [M+H]<sup>+</sup> calcd. for C<sub>28</sub>H<sub>15</sub>F<sub>8</sub>N<sub>4</sub>O<sub>2</sub><sup>+</sup>, 591.1062; found 591.1062.

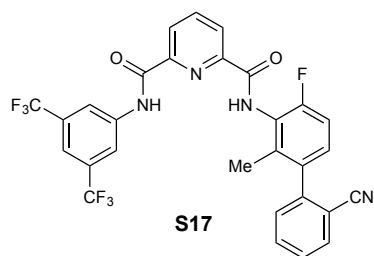

*N*<sub>2</sub>-(3,5-bis(trifluoromethyl)phenyl)-*N*<sub>6</sub>-(2'-cyano-4-fluoro-2-methyl-[1,1'-biphenyl]-3-yl)pyridine-2,6-dicarboxamide **S17**. White solid, 0.88 g. Yield: 51 %. TLC (Hexanes:EtOAc, 33:67 v/v): RF = 0.58; <sup>1</sup>H NMR (600 MHz, DMSO-*d*<sub>6</sub>): δ 11.32 (br, 1H), 10.93 (br, 1H), 8.54 (s, 2H), 8.47 (dd, *J* = 7.7, 1.3 Hz, 1H), 8.43 (dd, *J* = 7.7, 1.2 Hz, 1H), 8.36 (t, *J* = 7.7 Hz, 1H), 8.00 (d, *J* = 7.7 Hz, 1H), 7.91 (s, 1H), 7.83 (td, *J* = 7.7, 1.4 Hz, 1H), 7.65 (td, *J* = 7.7, 1.2 Hz, 1H), 7.53 (d, *J* = 7.7 Hz, 1H), 7.43–7.37 (m, 2H), 2.10 (s, 3H); <sup>13</sup>C NMR (151 MHz, DMSO-*d*<sub>6</sub>): δ 162.37, 161.99, 158.01 (d, *J*<sub>C-F</sub> = 248.7 Hz), 148.15, 147.92, 143.64, 140.37, 139.85, 136.48 (d, *J*<sub>C-F</sub> = 0.8 Hz), 134.94 (d, *J*<sub>C-F</sub> = 3.3 Hz), 133.37, 133.13, 130.77 (q, *J*<sub>C-F</sub> = 32.9 Hz), 130.75, 129.89 (d, *J*<sub>C-F</sub> = 8.8 Hz), 128.60, 125.87, 125.80, 123.93 (d, *J*<sub>C-F</sub> = 13.3 Hz), 123.21 (q, *J*<sub>C-F</sub> = 273.0 Hz), 121.26–121.18 (m), 117.86, 117.46–117.41 (m), 113.46 (d, *J*<sub>C-F</sub> = 20.8 Hz), 111.98, 15.56 (d, *J*<sub>C-F</sub> = 2.1 Hz); HRMS (ESI-TOF) *m/z*: [M+H]<sup>+</sup> calcd. for C<sub>29</sub>H<sub>18</sub>F<sub>7</sub>N<sub>4</sub>O<sub>2</sub><sup>+</sup>, 587.1312; found 587.1313.

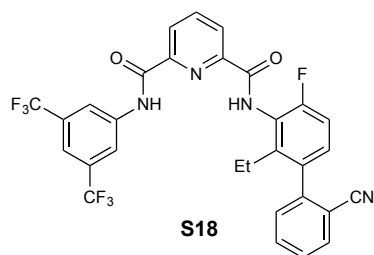

*N*<sub>2</sub>-(3,5-bis(trifluoromethyl)phenyl)-*N*<sub>6</sub>-(2'-cyano-2-ethyl-4-fluoro-[1,1'-biphenyl]-3-yl)pyridine-2,6-dicarboxamide **S18**. White solid, 0.20 g. Yield: 27 %. TLC (Hexanes:EtOAc, 33:67 v/v): RF = 0.61; <sup>1</sup>H NMR (600 MHz, CDCl<sub>3</sub>): δ 10.39 (br, 1H), 9.54 (br, 1H), 8.58 (dd, *J* = 7.8, 1.1 Hz, 1H), 8.55 (dd, *J* = 7.8, 1.2 Hz, 1H), 8.36 (s, 2H), 8.20 (t, *J* = 7.8 Hz, 1H), 7.73 (dd, *J* = 7.8, 1.4 Hz, 1H), 7.65 (dd, *J* = 7.7, 1.4 Hz, 1H), 7.60 (s, 1H), 7.49 (td, *J* = 7.7, 1.3 Hz, 1H), 7.38 (d, *J* = 7.8 Hz, 1H), 7.09 (dd, *J* = 8.5, 5.3 Hz, 1H), 6.85 (t, *J* = 8.8 Hz, 1H), 2.57–2.51 (m, 1H), 2.33–2.27 (m, 1H), 0.87 (t, *J* = 7.6 Hz, 3H); <sup>13</sup>C NMR (151 MHz, CDCl<sub>3</sub>): δ 162.64, 162.48, 158.28 (d, *J*<sub>C-F</sub> = 251.4 Hz), 148.61, 147.99, 144.40, 142.32, 139.80, 138.75, 134.58 (d, *J*<sub>C-F</sub> = 3.6 Hz), 132.88, 132.77, 132.35 (q, *J*<sub>C-F</sub> = 33.6 Hz), 130.75, 130.48 (d, *J*<sub>C-F</sub> = 8.6 Hz), 128.21, 126.58,

126.03, 122.96 (q,  $J_{C-F} = 273.0$  Hz), 122.74 (d,  $J_{C-F} = 13.3$  Hz), 120.31–120.23 (m), 118.41, 118.08–118.00 (m), 113.52 (d,  $J_{C-F} = 21.0$  Hz), 112.72, 22.77 (d,  $J_{C-F} = 1.9$  Hz), 14.26; HRMS (ESI-TOF)  $m/z$ :  $[M+H]^+$  calcd. for  $C_{30}H_{20}F_7N_4O_2^+$ , 601.1469; found 601.1469.

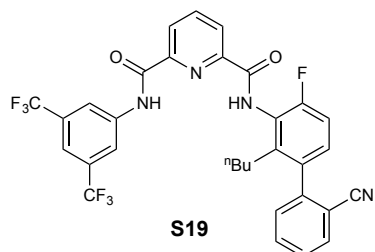

*N*<sub>2</sub>-(3,5-bis(trifluoromethyl)phenyl)-*N*<sub>6</sub>-(2-butyl-2'-cyano-4-fluoro-[1,1'-biphenyl]-3-yl)pyridine-2,6-dicarboxamide **S19**. White solid. TLC (Hexanes:EtOAc, 33:67 v/v):  $R_F = 0.65$ ;  $^1H$  NMR (600 MHz, DMSO-*d*<sub>6</sub>):  $\delta$  11.39 (br, 1H), 10.88 (br, 1H), 8.55 (s, 2H), 8.47 (dd,  $J = 7.7, 1.1$  Hz, 1H), 8.44 (dd,  $J = 7.8, 1.2$  Hz, 1H), 8.37 (t,  $J = 7.7$  Hz, 1H), 8.00 (dd,  $J = 7.7, 1.4$  Hz, 1H), 7.91 (s, 1H), 7.82 (td,  $J = 7.7, 1.3$  Hz, 1H), 7.65 (td,  $J = 7.7, 1.2$  Hz, 1H), 7.55 (d,  $J = 7.9$  Hz, 1H), 7.40 (t,  $J = 8.7$  Hz, 1H), 7.36 (dd,  $J = 8.6, 5.5$  Hz, 1H), 2.63-2.59 (m, 1H), 2.40-2.35 (m, 1H), 1.40-1.33 (m, 1H), 1.32-1.24 (m, 1H), 1.00-0.93 (m, 2H), 0.47 (t,  $J = 7.3$  Hz, 3H);  $^{13}C$  NMR (151 MHz, DMSO-*d*<sub>6</sub>):  $\delta$  162.45, 162.41, 158.33 (d,  $J_{C-F} = 249.0$  Hz), 148.16, 147.86, 143.55, 141.05, 140.47, 139.90, 134.91 (d,  $J_{C-F} = 3.5$  Hz), 133.09, 133.01, 130.84 (q,  $J_{C-F} = 32.9$  Hz), 130.80, 130.34 (d,  $J_{C-F} = 8.8$  Hz), 128.63, 125.85, 125.76, 123.65 (d,  $J_{C-F} = 13.5$  Hz), 123.19 (q,  $J_{C-F} = 272.9$  Hz), 120.79–120.74 (m), 117.88, 117.41–117.34 (m), 113.60 (d,  $J_{C-F} = 21.0$  Hz), 111.29, 30.98, 28.21, 21.83, 12.92; HRMS (ESI-TOF)  $m/z$ :  $[M+H]^+$  calcd. for  $C_{32}H_{24}F_7N_4O_2^+$ , 629.1782; found 629.1783.

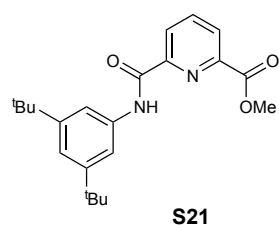

methyl 6-((3,5-di-*tert*-butylphenyl)carbamoyl)picolinate **S21**. Pale yellow solid, 0.202 g. Yield: 71 %. TLC (Hexanes:EtOAc, 67:33 v/v):  $R_F = 0.48$ ;  $^1H$  NMR (600 MHz,  $CDCl_3$ ):  $\delta$  9.91 (br, 1H), 8.50 (dd,  $J = 7.8, 1.1$  Hz, 1H), 8.27 (dd,  $J = 7.8, 1.1$  Hz, 1H), 8.07 (t,  $J = 7.7$  Hz, 1H), 7.65 (d,  $J = 1.7$  Hz, 2H), 7.25 (t,  $J = 1.7$  Hz, 1H), 4.07 (s, 3H), 1.37 (s, 18H);  $^{13}C$  NMR (151 MHz,

CDCl<sub>3</sub>):  $\delta$  164.90, 161.13, 151.70, 150.46, 146.50, 138.83, 136.75, 127.37, 125.48, 118.92, 114.84, 53.02, 35.02, 31.46; HRMS (ESI-TOF)  $m/z$ : [M+H]<sup>+</sup> calcd. for C<sub>22</sub>H<sub>29</sub>FN<sub>2</sub>O<sub>3</sub><sup>+</sup>, 369.2173; found 369.2172.

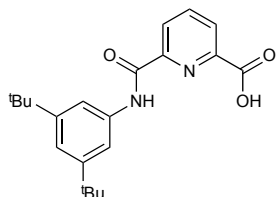

6-((3,5-di-*tert*-butylphenyl)carbamoyl)picolinic acid. White solid. <sup>1</sup>H NMR (600 MHz, DMSO-*d*<sub>6</sub>):  $\delta$  10.79 (br, 1H), 8.41 (dd,  $J$  = 7.4, 1.5 Hz, 1H), 8.33 (dd,  $J$  = 7.7, 1.5 Hz, 1H), 8.30 (dd,  $J$  = 7.7, 7.4 Hz, 1H), 7.70 (d,  $J$  = 1.7 Hz, 2H), 7.24 (t,  $J$  = 1.7 Hz, 1H), 1.33 (s, 18H); <sup>13</sup>C NMR (151 MHz, DMSO-*d*<sub>6</sub>):  $\delta$  164.78, 161.37, 150.86, 149.42, 146.08, 140.16, 137.39, 126.92, 125.82, 118.18, 115.21, 34.67, 31.27; HRMS (ESI-TOF)  $m/z$ : [M-H]<sup>-</sup> calcd. for C<sub>21</sub>H<sub>25</sub>N<sub>2</sub>O<sub>3</sub><sup>-</sup>, 353.1871; found 353.1877.

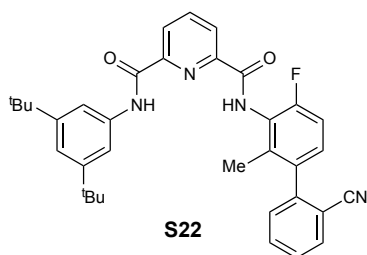

*N*<sub>2</sub>-(2'-cyano-4-fluoro-2-methyl-[1,1'-biphenyl]-3-yl)-*N*<sub>6</sub>-(3,5-di-*tert*-butylphenyl)pyridine-2,6-dicarboxamide **S22**. White solid. TLC (Hexanes:EtOAc, 33:67 v/v): RF = 0.58; <sup>1</sup>H NMR (600 MHz, DMSO-*d*<sub>6</sub>):  $\delta$  11.04 (br, 1H), 10.91 (br, 1H), 8.43 (dd,  $J$  = 7.7, 1.3 Hz, 1H), 8.37 (dd,  $J$  = 7.7, 1.3 Hz, 1H), 8.32 (t,  $J$  = 7.7 Hz, 1H), 8.00 (ddd,  $J$  = 7.8, 1.4, 0.5 Hz, 1H), 7.83 (td,  $J$  = 7.7, 1.4 Hz, 1H), 7.65 (td,  $J$  = 7.7, 1.2 Hz, 1H), 7.60 (d,  $J$  = 1.7 Hz, 2H), 7.52 (ddd,  $J$  = 7.8, 1.3, 0.6 Hz, 1H), 7.40 (t,  $J$  = 8.8 Hz, 1H), 7.37 (dd,  $J$  = 8.6, 5.6 Hz, 1H), 7.26 (t,  $J$  = 1.7 Hz, 1H), 2.11 (s, 3H), 1.32 (s, 18H); <sup>13</sup>C NMR (151 MHz, DMSO-*d*<sub>6</sub>):  $\delta$  162.18, 161.55, 158.00 (d,  $J_{C-F}$  = 248.6 Hz), 150.78, 149.07, 148.12, 143.68, 140.05, 137.08, 136.37 (d,  $J_{C-F}$  = 0.9 Hz), 134.89 (d,  $J_{C-F}$  = 3.3 Hz), 133.37, 133.11, 130.74, 129.71 (d,  $J_{C-F}$  = 8.7 Hz), 128.60, 125.37, 125.15, 124.04 (d,  $J_{C-F}$  = 13.4 Hz), 118.59, 117.83, 116.60, 113.44 (d,  $J_{C-F}$  = 20.9 Hz), 111.99, 34.64, 31.24, 15.52 (d,  $J_{C-F}$  = 2.2 Hz); HRMS (ESI-TOF)  $m/z$ : [M+H]<sup>+</sup> calcd. for C<sub>35</sub>H<sub>36</sub>FN<sub>4</sub>O<sub>2</sub><sup>+</sup>, 563.2817; found 563.2818.

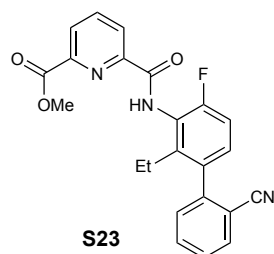

methyl 6-((2'-cyano-2-ethyl-4-fluoro-[1,1'-biphenyl]-3-yl)carbamoyl)picolinate **S23**. White solid, 3.54 g. Yield: 89 %.  $^1\text{H}$  NMR (600 MHz,  $\text{CDCl}_3$ ):  $\delta$  9.66 (br, 1H), 8.49 (d,  $J = 7.6$  Hz, 1H), 8.32 (d,  $J = 7.7$  Hz, 1H), 8.08 (t,  $J = 7.8$  Hz, 1H), 7.78 (d,  $J = 7.9$  Hz, 1H), 7.66 (td,  $J = 7.6, 1.4$  Hz, 1H), 7.50 (td,  $J = 7.7, 1.2$  Hz, 1H), 7.43 (d,  $J = 7.7$  Hz, 1H), 7.19–7.14 (m, 2H), 4.03 (s, 3H), 2.67–2.61 (m, 1H), 2.53–2.47 (m, 1H), 0.98 (t,  $J = 7.6$  Hz, 3H);  $^{13}\text{C}$  NMR (151 MHz,  $\text{CDCl}_3$ ):  $\delta$  164.88, 162.39, 158.40 (d,  $J_{\text{C-F}} = 252.1$  Hz), 149.33, 146.74, 144.54, 141.72, 138.79, 134.36 (d,  $J_{\text{C-F}} = 3.7$  Hz), 132.84, 132.46, 130.83, 130.08 (d,  $J_{\text{C-F}} = 8.5$  Hz), 128.02, 127.70, 125.72, 122.98 (d,  $J_{\text{C-F}} = 13.3$  Hz), 117.88, 113.95 (d,  $J_{\text{C-F}} = 21.0$  Hz), 113.30, 52.94, 22.88, 14.33; HRMS (ESI-TOF)  $m/z$ :  $[\text{M}+\text{H}]^+$  calcd. for  $\text{C}_{16}\text{H}_{11}\text{F}_6\text{N}_2\text{O}_3^+$ , 404.1405; found 404.1406.

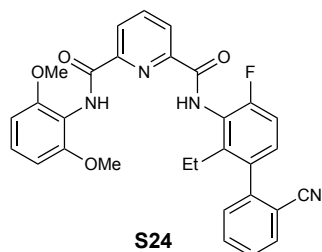

$N_2$ -(2'-cyano-2-ethyl-4-fluoro-[1,1'-biphenyl]-3-yl)- $N_6$ -(2,6-dimethoxyphenyl)pyridine-2,6-dicarboxamide **S24**. Pale yellow solid, 1.20 g. Yield: 64 %. TLC (Hexanes:EtOAc, 33:67 v/v):  $R_F = 0.13$ ;  $^1\text{H}$  NMR (600 MHz,  $\text{CDCl}_3$ ):  $\delta$  9.25 (br, 1H), 8.98 (br, 1H), 8.54 (dd,  $J = 7.6, 1.1$  Hz, 1H), 8.50 (dd,  $J = 7.7, 1.2$  Hz, 1H), 8.14 (t,  $J = 7.7$  Hz, 1H), 7.76 (ddd,  $J = 7.8, 1.3, 0.5$  Hz, 1H), 7.66 (td,  $J = 7.7, 1.4$  Hz, 1H), 7.50 (td,  $J = 7.7, 1.3$  Hz, 1H), 7.44 (d,  $J = 7.7$  Hz, 1H), 7.24 (t,  $J = 8.5$  Hz, 1H), 7.19 (dd,  $J = 8.6, 5.7$  Hz, 1H), 7.17 (t,  $J = 8.5$  Hz, 1H), 6.65 (d,  $J = 8.5$  Hz, 2H), 3.86 (s, 6H), 2.68–2.61 (m, 1H), 2.55–2.49 (m, 1H), 0.99 (t,  $J = 7.6$  Hz, 3H);  $^{13}\text{C}$  NMR (151 MHz,  $\text{CDCl}_3$ ):  $\delta$  162.47, 161.29, 158.45 (d,  $J_{\text{C-F}} = 251.8$  Hz), 155.48, 149.34, 148.09, 144.49, 141.77, 139.26, 134.45 (d,  $J_{\text{C-F}} = 3.7$  Hz), 132.79, 132.56, 130.82, 130.25 (d,  $J_{\text{C-F}} = 8.6$  Hz), 128.08, 128.01, 126.07, 125.50, 122.87 (d,  $J_{\text{C-F}} = 13.3$  Hz), 117.90, 114.00 (d,  $J_{\text{C-F}} = 20.9$  Hz),



113.43, 113.26, 104.40, 56.11, 22.94 (d,  $J_{C-F} = 2.2$  Hz), 14.41; HRMS (ESI-TOF)  $m/z$ :  $[M+H]^+$  calcd. for  $C_{30}H_{26}FN_4O_4^+$ , 525.1933; found 525.1932.

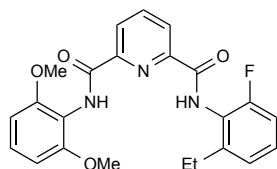

**S25**

*N*<sub>2</sub>-(2,6-dimethoxyphenyl)-*N*<sub>6</sub>-(2-ethyl-6-fluorophenyl)pyridine-2,6-dicarboxamide **S25**. White solid. TLC (Hexanes:EtOAc, 50:50 v/v):  $R_F = 0.20$ ;  $^1H$  NMR (600 MHz,  $CDCl_3$ ):  $\delta$  9.16 (br, 1H), 8.98 (br, 1H), 8.52 (dd,  $J = 7.7, 1.1$  Hz, 1H), 8.48 (dd,  $J = 7.9, 1.3$  Hz, 1H), 8.12 (t,  $J = 7.8$  Hz, 1H), 7.29–7.23 (m, 2H), 7.12 (d,  $J = 7.5$  Hz, 1H), 7.04 (ddd,  $J = 9.6, 8.2, 1.3$  Hz, 1H), 6.66 (d,  $J = 8.5$  Hz, 2H), 3.86 (s, 6H), 2.73 (q,  $J = 7.6$  Hz, 2H), 1.25 (t,  $J = 7.6$  Hz, 3H);  $^{13}C$  NMR (151 MHz,  $CDCl_3$ ):  $\delta$  162.17, 161.31, 157.93 (d,  $J_{C-F} = 248.5$  Hz), 155.42, 149.20, 148.27, 143.32, 139.22, 128.46 (d,  $J_{C-F} = 8.6$  Hz), 128.00, 125.93, 125.49, 124.11 (d,  $J_{C-F} = 3.2$  Hz), 122.10 (d,  $J_{C-F} = 12.9$  Hz), 113.55 (d,  $J_{C-F} = 20.5$  Hz), 113.53, 104.43, 56.11, 24.74 (d,  $J_{C-F} = 2.0$  Hz), 14.25; HRMS (ESI-TOF)  $m/z$ :  $[M+H]^+$  calcd. for  $C_{23}H_{23}FN_3O_4^+$ , 424.1667; found 424.1663.

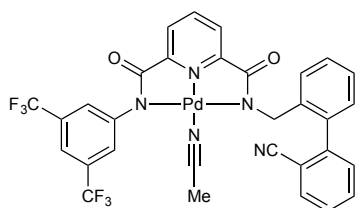

**T11**

**T11**. Yellow solid, 0.195 g. Yield: 86 %.  $^1H$  NMR (600 MHz,  $CD_3CN$ ):  $\delta$  8.15 (t,  $J = 7.8$  Hz, 1H), 7.81 (s, 2H), 7.75 (dd,  $J = 7.8, 1.3$  Hz, 1H), 7.71 (ddd,  $J = 7.8, 1.4, 0.6$  Hz, 1H), 7.68–7.65 (m, 2H), 7.59–7.56 (m, 2H), 7.50 (ddd,  $J = 8.3, 1.3, 0.6$  Hz, 1H), 7.44 (td,  $J = 7.6, 1.4$  Hz, 1H), 7.35 (td,  $J = 7.6, 1.3$  Hz, 1H), 7.34 (td,  $J = 7.7, 1.3$  Hz, 1H), 7.23 (dd,  $J = 7.5, 1.4$  Hz, 1H), 4.48–4.38 (m, 2H);  $^{13}C$  NMR (151 MHz,  $CD_3CN$ ):  $\delta$  169.45, 168.56, 151.73, 150.75, 148.22, 144.95, 141.56, 138.85, 136.98, 132.21, 132.07, 130.15 (q,  $J_{C-F} = 32.9$  Hz), 129.98, 129.60, 128.04, 127.97, 127.26, 126.37–126.35 (m), 125.97, 124.96, 124.95, 123.21 (q,  $J_{C-F} = 272.8$  Hz), 118.17, 112.12, 48.68; HRMS (ESI-TOF)  $m/z$ :  $[M+H]^+$  calcd. for  $C_{31}H_{20}F_6N_5O_2Pd^+$ , 714.0551; found 714.0551. The signals of  $CH_3CN$  for  $^1H$  NMR and  $^{13}C$  NMR were omitted because the bound  $CH_3CN$  was replaced by  $CD_3CN$ .

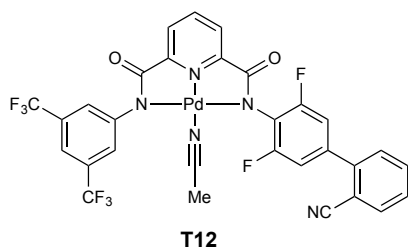

**T12.** Yellow solid, 0.102 g. Yield: 46 %.  $^1\text{H}$  NMR (600 MHz,  $\text{CD}_3\text{CN}$ ):  $\delta$  8.33 (t,  $J = 7.8$  Hz, 1H), 7.92 (dd,  $J = 7.9, 1.3$  Hz, 1H), 7.89 (s, 2H), 7.88 (dd,  $J = 7.8, 1.3$  Hz, 1H), 7.85 (ddd,  $J = 7.7, 1.3, 0.5$  Hz, 1H), 7.75 (td,  $J = 7.7, 1.4$  Hz, 1H), 7.68 (s, 1H), 7.62 (ddd,  $J = 7.9, 1.3, 0.5$  Hz, 1H), 7.57 (td,  $J = 7.7, 1.2$  Hz, 1H), 7.27–7.24 (m, 2H);  $^{13}\text{C}$  NMR (151 MHz,  $\text{CD}_3\text{CN}$ ):  $\delta$  170.07, 169.57, 158.64 (dd,  $J_{\text{C-F}} = 247.9, 6.4$  Hz), 152.90, 151.11, 149.64, 143.78, 143.75 (t,  $J_{\text{C-F}} = 2.1$  Hz), 137.57 (t,  $J_{\text{C-F}} = 10.0$  Hz), 134.72, 134.36, 131.70 (q,  $J_{\text{C-F}} = 32.9$  Hz), 131.04, 129.72, 127.82, 127.77–127.70 (m), 127.40, 124.96 (t,  $J_{\text{C-F}} = 16.9$  Hz), 124.63 (q,  $J_{\text{C-F}} = 272.0$  Hz), 119.33, 113.24 (dd,  $J_{\text{C-F}} = 20.9, 5.5$  Hz), 111.88; HRMS (ESI-TOF)  $m/z$ :  $[\text{M}+\text{H}]^+$  calcd. for  $\text{C}_{30}\text{H}_{16}\text{F}_8\text{N}_5\text{O}_2\text{Pd}^+$ , 736.0206; found 736.0207. The signals of  $\text{CH}_3\text{CN}$  for  $^1\text{H}$  NMR and  $^{13}\text{C}$  NMR were omitted because the bound  $\text{CH}_3\text{CN}$  was replaced by  $\text{CD}_3\text{CN}$ .

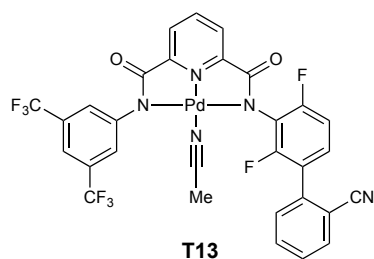

**T13.** Yellow solid, 0.133 g. Yield: 91 %.  $^1\text{H}$  NMR (600 MHz,  $\text{CD}_3\text{CN}$ ):  $\delta$  8.31 (t,  $J = 7.8$  Hz, 1H), 7.91 (dd,  $J = 7.8, 1.3$  Hz, 1H), 7.87–7.86 (m, 4H), 7.76 (td,  $J = 7.8, 1.4$  Hz, 1H), 7.67 (s, 1H), 7.60–7.56 (m, 2H), 7.33 (td,  $J = 8.1, 6.0$  Hz, 1H), 7.16 (td,  $J = 9.0, 1.5$  Hz, 1H);  $^{13}\text{C}$  NMR (151 MHz,  $\text{CD}_3\text{CN}$ ):  $\delta$  170.06, 169.74, 159.39 (dd,  $J_{\text{C-F}} = 249.2, 4.8$  Hz), 155.82 (dd,  $J_{\text{C-F}} = 235.7, 5.5$  Hz), 152.91, 151.12, 149.64, 143.74, 139.58, 134.21, 134.17, 132.05, 131.70 (q,  $J_{\text{C-F}} = 32.9$  Hz), 129.82, 128.92 (dd,  $J_{\text{C-F}} = 9.8, 3.9$  Hz), 127.77, 127.74–127.66 (m), 127.36, 125.13 (t,  $J_{\text{C-F}} = 17.2$  Hz), 124.62 (q,  $J_{\text{C-F}} = 272.0$  Hz), 123.58 (dd,  $J_{\text{C-F}} = 15.4, 3.7$  Hz), 118.96, 113.60, 112.52 (dd,  $J_{\text{C-F}} = 21.4, 3.8$  Hz); HRMS (ESI-TOF)  $m/z$ :  $[\text{M}+\text{H}]^+$  calcd. for  $\text{C}_{30}\text{H}_{16}\text{F}_8\text{N}_5\text{O}_2\text{Pd}^+$ , 736.0206; found 736.0203. The signals of  $\text{CH}_3\text{CN}$  for  $^1\text{H}$  NMR and  $^{13}\text{C}$  NMR were omitted because the bound  $\text{CH}_3\text{CN}$  was replaced by  $\text{CD}_3\text{CN}$ .

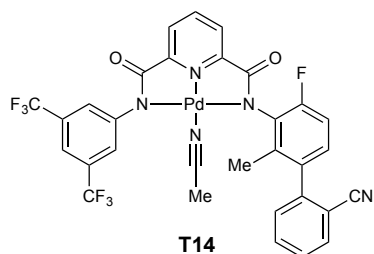

**T14.** Yellow solid, 0.77 g. Yield: 79 %. rotameric mixture.  $^1\text{H}$  NMR (600 MHz,  $\text{CD}_3\text{CN}$ ):  $\delta$  8.32–8.26 (m, 1H), 7.90 (dd,  $J = 7.8, 1.3$  Hz, 1H), 7.87–7.82 (m, 4H), 7.76–7.71 (m, 1H), 7.70–7.66 (m, 1H), 7.55 (td,  $J = 7.6, 1.1$  Hz, 1H), 7.48–7.37 (m, 1H), 7.15–7.10 (m, 2H), 2.19–2.17 (m, 3H);  $^{13}\text{C}$  NMR (151 MHz,  $\text{CD}_3\text{CN}$ ) rotameric mixture, resonances for the minor rotamer are enclosed in parenthesis [ ]:  $\delta$  170.05 [172.45], 169.23 [169.14], 158.51 (d,  $J_{\text{C-F}} = 245.2$  Hz) [158.48], 152.89 [152.84], 151.87 [151.92], 149.77 [149.84], 145.81 [145.53], 143.59, 136.61 [136.49], 135.85 (d,  $J_{\text{C-F}} = 3.5$  Hz), 134.98 (d,  $J_{\text{C-F}} = 13.3$  Hz) [134.86], 134.02 [134.32], 133.77 [133.82], 131.76 [131.97], 131.68 (q,  $J_{\text{C-F}} = 32.9$  Hz), 129.11 [129.08], 128.75 (d,  $J_{\text{C-F}} = 8.6$  Hz), 127.60–127.55 (m), 127.46, 127.14 [127.24], 124.63 (q,  $J_{\text{C-F}} = 272.0$  Hz), 119.19 [119.04], 113.70 (d,  $J_{\text{C-F}} = 21.5$  Hz), 16.02 (d,  $J_{\text{C-F}} = 2.5$  Hz) [16.20]; HRMS (ESI-TOF)  $m/z$ :  $[\text{M}+\text{H}]^+$  calcd. for  $\text{C}_{31}\text{H}_{18}\text{F}_7\text{N}_5\text{O}_2\text{Pd}^+$ , 732.0456; found 732.0456. The signals of  $\text{CH}_3\text{CN}$  for  $^1\text{H}$  NMR and  $^{13}\text{C}$  NMR were omitted because the bound  $\text{CH}_3\text{CN}$  was replaced by  $\text{CD}_3\text{CN}$ .

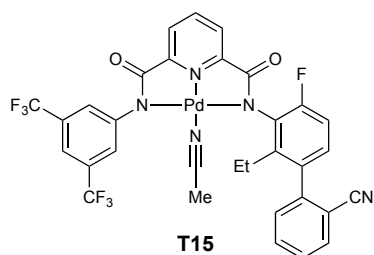

**T15.** Yellow solid, 0.128 g. Yield: 86 %. rotameric mixture.  $^1\text{H}$  NMR (600 MHz,  $\text{CD}_3\text{CN}$ ):  $\delta$  8.33–8.26 (m, 1H), 7.91–7.89 (m, 1H), 7.87–7.82 (m, 4H), 7.75–7.69 (m, 1H), 7.67 (s, 1H), 7.58–7.55 (m, 1H), 7.51–7.37 (m, 1H), 7.13–7.09 (m, 2H), 2.95–2.83 (m, 1H), 2.55–2.39 (m, 1H), 1.02–0.98 (m, 3H);  $^{13}\text{C}$  NMR (151 MHz,  $\text{CD}_3\text{CN}$ ) rotameric mixture, resonances for the minor rotamer are enclosed in parenthesis [ ]:  $\delta$  170.07, 169.81 [169.57], 158.71 (d,  $J_{\text{C-F}} = 245.3$  Hz) [158.65], 152.86, 151.90 [151.96], 149.75 [149.84], 145.70 [145.43], 143.63 [143.65], 142.34 [142.31], 135.73 (d,  $J_{\text{C-F}} = 3.6$  Hz) [135.65], 134.75 (d,  $J_{\text{C-F}} = 13.4$  Hz) [134.61], 133.82 [134.03], 133.74 [133.57], 131.91 [132.06], 131.70 (q,  $J_{\text{C-F}} = 32.9$  Hz) [131.69], 129.21, 129.16–129.13

(m), 127.66–127.54 (m), 127.46 [127.48], 127.17 [127.25], 124.63 (q,  $J_{C-F} = 272.1$  Hz) [124.64], 119.22 [119.05], 113.84 (d,  $J_{C-F} = 21.6$  Hz) [113.86], 23.64 (d,  $J_{C-F} = 2.3$  Hz), 14.65 [14.73]; HRMS (ESI-TOF)  $m/z$ :  $[M+H]^+$  calcd. for  $C_{32}H_{21}F_7N_5O_2Pd^+$ , 746.0613; found 746.0613. The signals of  $CH_3CN$  for  $^1H$  NMR and  $^{13}C$  NMR were omitted because the bound  $CH_3CN$  was replaced by  $CD_3CN$ .

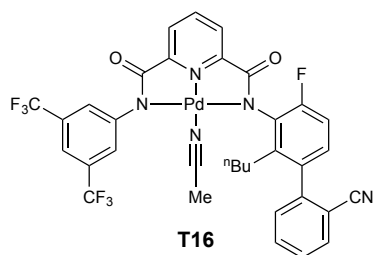

**T16.** Yellow solid. rotameric mixture.  $^1H$  NMR (600 MHz,  $CD_3CN$ ):  $\delta$  8.33–8.27 (m, 1H), 7.91–7.67 (m, 7H), 7.59–7.34 (m, 2H), 7.25–6.95 (m, 2H), 3.28–2.79 (m, 1H), 2.55–2.36 (m, 1H), 1.55–1.27 (m, 2H), 1.22–1.06 (m, 2H), 0.65–0.59 (m, 3H);  $^{13}C$  NMR (151 MHz,  $CD_3CN$ ) rotameric mixture, resonances for the minor rotamer are enclosed in parenthesis [ ]:  $\delta$  170.05 [170.76, 170.34], 169.68 [169.47], 158.68 (d,  $J_{C-F} = 245.3$  Hz) [158.8, 158.63], 152.88 [152.86, 152.45], 151.91 [151.96, 151.72], 149.72 [150.26, 149.82], 145.76 [145.80, 145.49], 143.67 [143.69, 142.85], 141.25, 135.90 (d,  $J_{C-F} = 3.6$  Hz) [136.10, 135.86], 134.82 (d,  $J_{C-F} = 13.3$  Hz) [134.71], 133.77 [134.14, 134.01], 133.71 [133.52, 133.15], 132.02 [132.17, 131.78], 131.71 (q,  $J_{C-F} = 32.9$  Hz) [132.40, 131.70], 129.19–129.04 (m), 127.66–127.54 (m), 127.47 [127.24], 127.16 [126.96, 126.68], 124.63 (q,  $J_{C-F} = 272.0$  Hz) [124.64, 124.61], 119.27 [119.52, 119.08], 113.79 (d,  $J_{C-F} = 21.7$  Hz) [114.46, 113.96], 32.43 [33.11, 32.54], 29.85 (d,  $J_{C-F} = 2.2$  Hz) [29.96, 29.80], 23.48 [23.36, 23.22], 13.82 [13.84, 13.74]; HRMS (ESI-TOF)  $m/z$ :  $[M+H]^+$  calcd. for  $C_{34}H_{24}F_7N_5O_2Pd^+$ , 774.0926; found 774.0934. The signals of  $CH_3CN$  for  $^1H$  NMR and  $^{13}C$  NMR were omitted because the bound  $CH_3CN$  was replaced by  $CD_3CN$ .

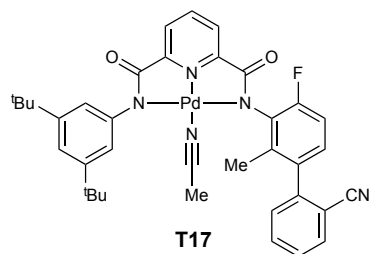

**T17.** Orange solid, 0.202 g. Yield: 95 %. rotameric mixture.  $^1\text{H}$  NMR (600 MHz,  $\text{CD}_3\text{CN}$ ):  $\delta$  8.27–8.22 (m, 1H), 7.85–7.77 (m, 3H), 7.75–7.68 (m, 1H), 7.57–7.51 (m, 1H), 7.49–7.35 (m, 1H), 7.23–7.21 (m, 1H), 7.13–6.98 (m, 4H), 2.16 (s, 3H), 1.29 (s, 18H);  $^{13}\text{C}$  NMR (151 MHz,  $\text{CD}_3\text{CN}$ ) rotameric mixture, resonances for the minor rotamer are enclosed in parenthesis [ ]:  $\delta$  169.62 [172.51], 169.20 [169.11], 158.41 (d,  $J_{\text{C-F}} = 245.0$  Hz), 154.05 [154.01], 151.95 [151.99], 151.67 [151.62], 147.55 [147.61], 145.88 [145.60], 143.21, 136.41 (d,  $J_{\text{C-F}} = 1.4$  Hz), 135.82 (d,  $J_{\text{C-F}} = 3.5$  Hz), 135.28 (d,  $J_{\text{C-F}} = 13.4$  Hz), 134.05, 133.74 [133.77], 131.75 [131.97], 129.07 [129.04], 128.37 (d,  $J_{\text{C-F}} = 8.5$  Hz), 126.90, 126.40 [126.50], 121.55, 119.58 [119.49], 119.17, 113.62, 113.64 (d,  $J_{\text{C-F}} = 21.7$  Hz) [113.67], 35.42, 31.76, 20.65, 16.06 (d,  $J_{\text{C-F}} = 2.5$  Hz) [16.22]; HRMS (ESI-TOF)  $m/z$ :  $[\text{M}+\text{H}]^+$  calcd. for  $\text{C}_{37}\text{H}_{37}\text{FN}_5\text{O}_2\text{Pd}^+$ , 708.1961; found 708.1961. The signals of  $\text{CH}_3\text{CN}$  for  $^1\text{H}$  NMR and  $^{13}\text{C}$  NMR were omitted because the bound  $\text{CH}_3\text{CN}$  was replaced by  $\text{CD}_3\text{CN}$ .

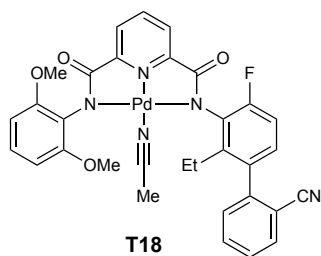

**T18.** Yellow solid, 0.836 g. Yield: 83 %. rotameric mixture.  $^1\text{H}$  NMR (600 MHz,  $\text{CD}_3\text{CN}$ ):  $\delta$  8.28–8.24 (m, 1H), 7.85–7.76 (m, 3H), 7.74–7.67 (m, 1H), 7.57–7.53 (m, 1H), 7.52–7.32 (m, 1H), 7.14–7.10 (m, 1H), 7.08–7.01 (m, 2H), 6.63–6.60 (m, 2H), 3.81–3.80 (m, 3H), 3.79–3.79 (m, 3H), 3.02–2.81 (m, 1H), 2.52–2.32 (m, 1H), 1.03–0.97 (m, 3H);  $^{13}\text{C}$  NMR (151 MHz,  $\text{CD}_3\text{CN}$ ) rotameric mixture, resonances for the minor rotamer are enclosed in parenthesis [ ]:  $\delta$  169.61 [169.34], 168.78, 158.51 (d,  $J_{\text{C-F}} = 245.1$  Hz) [158.47], 156.11, 156.09, 152.88 [152.83], 152.31 [152.37], 145.87 [145.63], 143.23, 141.88 (d,  $J_{\text{C-F}} = 1.4$  Hz), 135.61 (d,  $J_{\text{C-F}} = 3.6$  Hz) [135.52], 135.37 (d,  $J_{\text{C-F}} = 13.6$  Hz) [135.27], 133.82 [134.00], 133.61 [133.52], 131.84 [132.07], 129.10 [129.05], 128.45 (d,  $J_{\text{C-F}} = 8.7$  Hz), 126.99 [126.97], 126.62, 126.57, 125.38 [125.53], 119.01 [119.10], 113.82 [113.89], 113.71 (d,  $J_{\text{C-F}} = 21.9$  Hz), 105.29, 105.28, 56.57, 56.55, 23.63 (d,  $J_{\text{C-F}} = 2.3$  Hz), 14.7 [14.78]; HRMS (ESI-TOF)  $m/z$ :  $[\text{M}+\text{H}]^+$  calcd. for  $\text{C}_{32}\text{H}_{27}\text{FN}_5\text{O}_4\text{Pd}^+$ , 670.1076; found 670.1079. The signals of  $\text{CH}_3\text{CN}$  for  $^1\text{H}$  NMR and  $^{13}\text{C}$  NMR were omitted because the bound  $\text{CH}_3\text{CN}$  was replaced by  $\text{CD}_3\text{CN}$ .

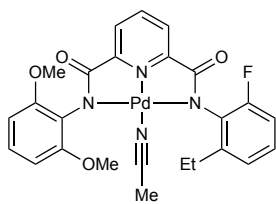

**T19**

**T19.** Yellow solid, 0.138 g. Yield: 81 %.  $^1\text{H}$  NMR (600 MHz,  $\text{CD}_3\text{CN}$ ):  $\delta$  8.24 (t,  $J = 7.8$  Hz, 1H), 7.78–7.75 (m, 2H), 7.13–7.10 (m, 2H), 7.04 (d,  $J = 7.7$  Hz, 1H), 6.94 (ddd,  $J = 9.9, 8.2, 1.4$  Hz, 1H), 6.61 (d,  $J = 8.4$  Hz, 2H), 3.80 (s, 3H), 3.79 (s, 3H), 2.89–2.83 (m, 1H), 2.76–2.69 (m, 1H), 1.26 (t,  $J = 7.5$  Hz, 3H);  $^{13}\text{C}$  NMR (151 MHz,  $\text{CD}_3\text{CN}$ ):  $\delta$  169.83, 169.36, 158.91 (d,  $J_{\text{C-F}} = 243.2$  Hz), 150.67, 153.48, 153.90, 144.34, 143.78, 135.03 (d,  $J_{\text{C-F}} = 13.1$  Hz), 127.59 (d,  $J_{\text{C-F}} = 8.6$  Hz), 127.49, 127.12, 127.10, 126.25, 125.39 (d,  $J_{\text{C-F}} = 3.1$  Hz), 114.30 (d,  $J_{\text{C-F}} = 21.4$  Hz), 105.92, 105.89, 57.16, 57.15, 26.18 (d,  $J_{\text{C-F}} = 2.5$  Hz), 15.60; HRMS (ESI-TOF)  $m/z$ :  $[\text{M}+\text{H}]^+$  calcd. for  $\text{C}_{25}\text{H}_{24}\text{FN}_4\text{O}_4\text{Pd}^+$ , 569.0811; found 569.0808. The signals of  $\text{CH}_3\text{CN}$  for  $^1\text{H}$  NMR and  $^{13}\text{C}$  NMR were omitted because the bound  $\text{CH}_3\text{CN}$  was replaced by  $\text{CD}_3\text{CN}$ .

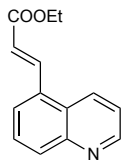

**5a**

ethyl (*E*)-3-(quinolin-5-yl)acrylate **5a**. Pale yellow solid, 16.7 mg. Yield: 73%. TLC (Hexanes:EtOAc, 67:33 v/v):  $R_F = 0.17$ ;  $^1\text{H}$  NMR (600 MHz,  $\text{CDCl}_3$ ):  $\delta$  8.97 (dd,  $J = 4.1, 1.6$  Hz, 1H), 8.54 (d,  $J = 8.6$  Hz, 1H), 8.42 (d,  $J = 15.8$  Hz, 1H), 8.16 (d,  $J = 8.4$  Hz, 1H), 7.82 (d,  $J = 7.3$  Hz, 1H), 7.50 (dd,  $J = 8.3, 7.3$  Hz, 1H), 7.49 (dd,  $J = 8.6, 4.1$  Hz, 1H), 6.56 (d,  $J = 15.7$  Hz, 1H), 4.33 (q,  $J = 7.1$  Hz, 2H), 1.38 (t,  $J = 7.1$  Hz, 3H);  $^{13}\text{C}$  NMR (151 MHz,  $\text{CDCl}_3$ ):  $\delta$  166.58, 150.68, 148.40, 139.89, 132.11, 131.75, 131.74, 129.03, 126.60, 125.28, 121.94, 121.59, 60.78, 14.36; HRMS (ESI-TOF)  $m/z$ :  $[\text{M}+\text{H}]^+$  calcd. for  $\text{C}_{14}\text{H}_{14}\text{NO}_2^+$ , 228.1019; found 228.1027.

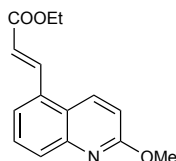

**5b**

ethyl (*E*)-3-(2-methoxyquinolin-5-yl)acrylate **5b**. White solid, 17.2 mg. Yield: 67%. TLC (Hexanes:EtOAc, 67:33 v/v): RF = 0.60;  $^1\text{H}$  NMR (600 MHz,  $\text{CDCl}_3$ ):  $\delta$  8.38–8.35 (m, 2H), 7.89 (d,  $J = 7.8$  Hz, 1H), 7.64 (ddd,  $J = 7.2, 1.8, 0.6$  Hz, 1H), 7.61 (t,  $J = 7.8$  Hz, 1H), 6.98 (d,  $J = 9.0$  Hz, 1H), 6.52 (d,  $J = 15.6$  Hz, 1H), 4.31 (q,  $J = 7.2$  Hz, 2H), 4.08 (s, 3H), 1.37 (t,  $J = 7.2$  Hz, 3H);  $^{13}\text{C}$  NMR (151 MHz,  $\text{CDCl}_3$ ):  $\delta$  166.70, 162.39, 147.02, 140.49, 134.25, 131.83, 129.52, 129.12, 123.39, 122.71, 121.42, 113.67, 60.70, 53.44, 14.36; HRMS (ESI-TOF)  $m/z$ :  $[\text{M}+\text{H}]^+$  calcd. for  $\text{C}_{15}\text{H}_{16}\text{NO}_3^+$ , 258.1125; found 258.1135.

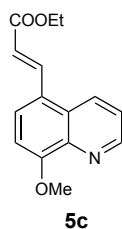

ethyl (*E*)-3-(8-methoxyquinolin-5-yl)acrylate **5c**. Yellow solid, 23.4 mg. Yield: 91%. TLC ( $\text{CH}_2\text{Cl}_2$ :MeOH, 90:10 v/v): RF = 0.47;  $^1\text{H}$  NMR (600 MHz,  $\text{CDCl}_3$ ):  $\delta$  8.98 (dd,  $J = 4.2, 1.8$  Hz, 1H), 8.53 (dd,  $J = 8.4, 1.2$  Hz, 1H), 8.35 (d,  $J = 15.6$  Hz, 1H), 7.82 (d,  $J = 7.8$  Hz, 1H), 7.53 (dd,  $J = 8.4, 4.2$  Hz, 1H), 7.08 (d,  $J = 7.8$  Hz, 1H), 6.48 (d,  $J = 15.6$  Hz, 1H), 4.31 (q,  $J = 7.2$  Hz, 2H), 4.13 (s, 3H), 1.37 (t,  $J = 7.2$  Hz, 3H);  $^{13}\text{C}$  NMR (151 MHz,  $\text{CDCl}_3$ ):  $\delta$  166.95, 157.09, 149.44, 140.06, 139.70, 131.71, 127.67, 126.13, 123.72, 122.25, 119.25, 107.43, 60.59, 56.22, 14.39; HRMS (ESI-TOF)  $m/z$ :  $[\text{M}+\text{H}]^+$  calcd. for  $\text{C}_{15}\text{H}_{16}\text{NO}_3^+$ , 258.1125; found 258.1136.

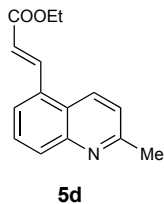

ethyl (*E*)-3-(2-methylquinolin-5-yl)acrylate **5d**. White solid, 16.6 mg. Yield: 69%. TLC (Hexanes:EtOAc, 67:33 v/v): RF = 0.23;  $^1\text{H}$  NMR (600 MHz,  $\text{CDCl}_3$ ):  $\delta$  8.43–8.39 (m, 2H), 8.40 (d,  $J = 16.2$  Hz, 1H), 8.06 (d,  $J = 8.4$  Hz, 1H), 7.76 (d,  $J = 7.2$  Hz, 1H), 7.69 (dd,  $J = 8.4, 7.2$  Hz, 1H), 7.37 (d,  $J = 9.0$  Hz, 1H), 6.54 (d,  $J = 15.6$  Hz, 1H), 4.32 (q,  $J = 7.2$  Hz, 2H), 2.76 (s, 3H), 1.38 (t,  $J = 7.2$  Hz, 3H);  $^{13}\text{C}$  NMR (151 MHz,  $\text{CDCl}_3$ ):  $\delta$  166.68, 159.35, 148.04, 140.12, 131.80, 131.77, 130.96, 128.98, 124.85, 124.39, 122.55, 121.59, 60.74, 25.24, 14.36; HRMS (ESI-TOF)  $m/z$ :  $[\text{M}+\text{H}]^+$  calcd. for  $\text{C}_{15}\text{H}_{16}\text{NO}_2^+$ , 242.1176; found 242.1182.

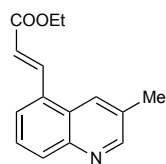

**5e**

ethyl (*E*)-3-(3-methylquinolin-5-yl)acrylate **5e**. Pale yellow solid, 19.8 mg. Yield: 82%. TLC (Hexanes:EtOAc, 67:33 v/v): RF = 0.20; <sup>1</sup>H NMR (600 MHz, CDCl<sub>3</sub>): δ 8.81 (d, *J* = 2.4 Hz, 1H), 8.42 (d, *J* = 16.2 Hz, 1H), 8.28 (s, 1H), 8.11 (d, *J* = 8.4 Hz, 1H), 7.79 (d, *J* = 7.2 Hz, 1H), 7.64 (dd, *J* = 8.4, 7.8 Hz, 1H), 6.54 (d, *J* = 15.6 Hz, 1H), 4.33 (q, *J* = 7.2 Hz, 2H), 2.57 (s, 3H), 1.38 (t, *J* = 7.2 Hz, 3H); <sup>13</sup>C NMR (151 MHz, CDCl<sub>3</sub>): δ 166.75, 152.62, 146.61, 140.14, 131.50, 131.50, 131.35, 130.42, 127.98, 126.45, 125.26, 121.45, 60.75, 19.05, 14.37; HRMS (ESI-TOF) *m/z*: [M+H]<sup>+</sup> calcd. for C<sub>15</sub>H<sub>16</sub>NO<sub>2</sub><sup>+</sup>, 242.1176; found 242.1183.

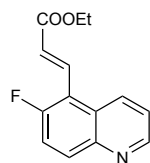

**5f**

ethyl (*E*)-3-(6-fluoroquinolin-5-yl)acrylate **5f**. Pale yellow solid, 10.5 mg. Yield: 43 %. TLC (Hexanes:EtOAc, 67:33 v/v): RF = 0.19; <sup>1</sup>H NMR (600 MHz, CDCl<sub>3</sub>): δ 8.93 (dd, *J* = 4.2, 1.2 Hz, 1H), 8.54 (d, *J* = 9.0 Hz, 1H), 8.17–8.12 (m, 2H), 7.56–7.50 (m, 2H), 6.73 (dd, *J* = 16.2, 0.6 Hz, 1H), 4.33 (q, *J* = 7.2 Hz, 2H), 1.38 (t, *J* = 7.2 Hz, 3H); <sup>13</sup>C NMR (151 MHz, CDCl<sub>3</sub>): δ 166.79, 159.19 (d, *J*<sub>C-F</sub> = 256.6 Hz), 149.78 (d, *J*<sub>C-F</sub> = 2.3 Hz), 145.49, 133.47, 133.31 (d, *J*<sub>C-F</sub> = 10.8 Hz), 131.92 (d, *J*<sub>C-F</sub> = 6.6 Hz), 127.45 (d, *J*<sub>C-F</sub> = 5.4 Hz), 125.97 (d, *J*<sub>C-F</sub> = 12.2 Hz), 122.14, 119.81 (d, *J*<sub>C-F</sub> = 27.6 Hz), 116.45 (d, *J*<sub>C-F</sub> = 12.0 Hz), 60.89, 14.33; HRMS (ESI-TOF) *m/z*: [M+H]<sup>+</sup> calcd. for C<sub>14</sub>H<sub>13</sub>FNO<sub>2</sub><sup>+</sup>, 246.0925; found 246.0936.

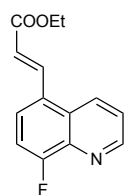

**5g**



ethyl (*E*)-3-(8-fluoroquinolin-5-yl)acrylate **5g**. White solid. Yield: 51% (calculated based on crude <sup>1</sup>H NMR). TLC (Hexanes:EtOAc, 67:33 v/v): RF = 0.20; <sup>1</sup>H NMR (600 MHz, CDCl<sub>3</sub>): δ 9.03 (dd, *J* = 4.2, 1.2 Hz, 1H), 8.56 (dt, *J* = 9.0, 1.8 Hz, 1H), 8.35 (d, *J* = 15.6 Hz, 1H), 7.79 (dd, *J* = 7.8, 4.8 Hz, 1H), 7.58 (dd, *J* = 9.0, 4.2 Hz, 1H), 7.44 (dd, *J* = 10.2, 8.4 Hz, 1H), 6.52 (dd, *J* = 16.2, 0.6 Hz, 1H), 4.32 (q, *J* = 7.2 Hz, 2H), 1.38 (t, *J* = 7.2 Hz, 3H); <sup>13</sup>C NMR (151 MHz, CDCl<sub>3</sub>): δ 166.49, 159.09 (d, *J*<sub>C-F</sub> = 261.5 Hz), 150.77 (d, *J*<sub>C-F</sub> = 1.6 Hz), 139.01 (d, *J*<sub>C-F</sub> = 1.8 Hz), 138.53 (d, *J*<sub>C-F</sub> = 11.6 Hz), 131.86 (d, *J*<sub>C-F</sub> = 2.9 Hz), 128.13, 128.10 (d, *J*<sub>C-F</sub> = 3.9 Hz), 125.41 (d, *J*<sub>C-F</sub> = 8.3 Hz), 122.55, 121.67 (d, *J*<sub>C-F</sub> = 2.1 Hz), 113.49 (d, *J*<sub>C-F</sub> = 19.8 Hz), 60.83, 14.35; HRMS (ESI-TOF) *m/z*: [M+H]<sup>+</sup> calcd. for C<sub>14</sub>H<sub>13</sub>FNO<sub>2</sub><sup>+</sup>, 246.0925; found 246.0933.

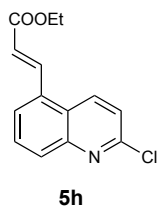

ethyl (*E*)-3-(2-chloroquinolin-5-yl)acrylate **5h**. White solid, 14.9 mg. Yield: 57%. TLC (Hexanes:EtOAc, 67:33 v/v): RF = 0.51; <sup>1</sup>H NMR (600 MHz, CDCl<sub>3</sub>): δ 8.47 (dd, *J* = 9.0, 1.2 Hz, 1H), 8.34 (d, *J* = 15.6 Hz, 1H), 8.06 (d, *J* = 8.4 Hz, 1H), 7.82 (d, *J* = 7.2 Hz, 1H), 7.75 (dd, *J* = 7.8, 7.2 Hz, 1H), 7.47 (d, *J* = 9.0 Hz, 1H), 6.55 (d, *J* = 15.6 Hz, 1H), 4.32 (q, *J* = 7.2 Hz, 2H), 1.38 (t, *J* = 7.2 Hz, 3H); <sup>13</sup>C NMR (151 MHz, CDCl<sub>3</sub>): δ 166.38, 151.16, 148.16, 139.39, 134.73, 132.26, 130.65, 130.64, 125.54, 125.20, 122.87, 122.59, 60.89, 14.34; HRMS (ESI-TOF) *m/z*: [M+H]<sup>+</sup> calcd. for C<sub>14</sub>H<sub>13</sub>ClNO<sub>2</sub><sup>+</sup>, 262.0629; found 262.0631.

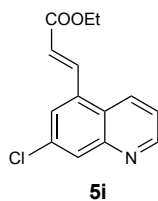

ethyl (*E*)-3-(7-chloroquinolin-5-yl)acrylate **5i**. Pale yellow solid, 13.2 mg. Yield: 50%. TLC (Hexanes:EtOAc, 67:33 v/v): RF = 0.32; <sup>1</sup>H NMR (600 MHz, CDCl<sub>3</sub>): δ 8.96 (dd, *J* = 4.2, 1.8 Hz, 1H), 8.48 (d, *J* = 9.0 Hz, 1H), 8.33 (d, *J* = 16.2 Hz, 1H), 8.14 (d, *J* = 2.4 Hz, 1H), 7.76 (d, *J* = 1.8 Hz, 1H), 7.49 (dd, *J* = 8.4, 4.2 Hz, 1H), 6.56 (d, *J* = 15.6 Hz, 1H), 4.33 (q, *J* = 7.2 Hz, 2H), 1.38 (t, *J* = 7.2 Hz, 3H); <sup>13</sup>C NMR (151 MHz, CDCl<sub>3</sub>): δ 166.17, 151.67, 148.89, 138.55, 135.01,

133.76, 131.83, 130.26, 125.96, 125.05, 123.33, 121.69, 60.97, 14.32; HRMS (ESI-TOF)  $m/z$ :  $[M+H]^+$  calcd. for  $C_{14}H_{13}ClNO_2^+$ , 262.0629; found 262.0640.

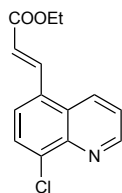

**5j**

ethyl (*E*)-3-(8-chloroquinolin-5-yl)acrylate **5j**. White solid. Yield: 27% (calculated based on crude  $^1H$  NMR). TLC (Hexanes:EtOAc, 67:33 v/v):  $R_F$  = 0.35;  $^1H$  NMR (600 MHz,  $CDCl_3$ ):  $\delta$  9.11 (dd,  $J$  = 4.1, 1.6 Hz, 1H), 8.57 (dd,  $J$  = 8.6, 1.6 Hz, 1H), 8.37 (d,  $J$  = 15.7 Hz, 1H), 7.87 (d,  $J$  = 7.9 Hz, 1H), 7.75 (d,  $J$  = 7.9 Hz, 1H), 7.58 (dd,  $J$  = 8.6, 4.1 Hz, 1H), 6.55 (d,  $J$  = 15.7 Hz, 1H), 4.33 (q,  $J$  = 7.1 Hz, 2H), 1.38 (t,  $J$  = 7.1 Hz, 3H);  $^{13}C$  NMR (151 MHz,  $CDCl_3$ ):  $\delta$  166.37, 151.15, 144.50, 139.03, 135.75, 132.41, 131.39, 129.33, 127.78, 125.10, 122.44, 122.37, 60.90, 14.34; HRMS (ESI-TOF)  $m/z$ :  $[M+H]^+$  calcd. for  $C_{14}H_{13}ClNO_2^+$ , 262.0629; found 262.0640.

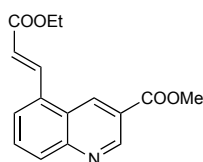

**5k**

methyl (*E*)-5-(3-ethoxy-3-oxoprop-1-en-1-yl)quinoline-3-carboxylate **5k**. White solid, 21.2 mg. Yield: 74%. TLC (Hexanes:EtOAc, 67:33 v/v):  $R_F$  = 0.26;  $^1H$  NMR (600 MHz,  $CDCl_3$ ):  $\delta$  9.49 (d,  $J$  = 2.4 Hz, 1H), 9.18 (dd,  $J$  = 1.8, 0.6 Hz, 1H), 8.46 (d,  $J$  = 15.6 Hz, 1H), 8.20 (d,  $J$  = 8.4 Hz, 1H), 7.88 (d,  $J$  = 7.2 Hz, 1H), 7.84 (dd,  $J$  = 8.4, 7.2 Hz, 1H), 6.59 (d,  $J$  = 15.6 Hz, 1H), 4.35 (q,  $J$  = 7.2 Hz, 2H), 4.05 (s, 3H), 1.40 (t,  $J$  = 7.2 Hz, 3H);  $^{13}C$  NMR (151 MHz,  $CDCl_3$ ):  $\delta$  166.36, 165.65, 150.31, 149.96, 139.18, 134.38, 133.55, 131.51, 131.33, 126.01, 125.25, 123.30, 122.92, 60.94, 52.65, 14.35; HRMS (ESI-TOF)  $m/z$ :  $[M+H]^+$  calcd. for  $C_{16}H_{16}NO_4^+$ , 286.1074; found 286.1084.

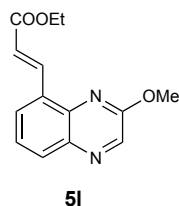

ethyl (*E*)-3-(3-methoxyquinoxalin-5-yl)acrylate **5l**. White solid, 21.2 mg. Yield: 82%. TLC (Hexanes:EtOAc, 80:20 v/v): RF = 0.37; <sup>1</sup>H NMR (600 MHz, CDCl<sub>3</sub>): δ 8.67 (d, *J* = 16.2 Hz, 1H), 8.52 (s, 1H), 8.05 (dd, *J* = 7.8, 1.2 Hz, 1H), 7.96 (d, *J* = 7.2 Hz, 1H), 7.57 (ddd, *J* = 8.2, 7.5, 0.5 Hz, 1H), 6.84 (d, *J* = 16.2 Hz, 1H), 4.31 (q, *J* = 7.2 Hz, 2H), 4.16 (s, 3H), 1.37 (t, *J* = 7.2 Hz, 3H); <sup>13</sup>C NMR (151 MHz, CDCl<sub>3</sub>): δ 167.24, 157.25, 139.93, 139.84, 138.95, 138.71, 131.16, 130.97, 128.71, 126.14, 120.25, 60.52, 54.02, 14.37; HRMS (ESI-TOF) *m/z*: [M+H]<sup>+</sup> calcd. for C<sub>14</sub>H<sub>15</sub>N<sub>2</sub>O<sub>3</sub><sup>+</sup>, 259.1077; found 259.1085.

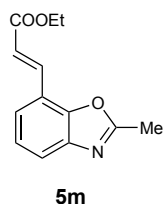

ethyl (*E*)-3-(2-methylbenzo[*d*]oxazol-7-yl)acrylate **5m**. White solid, 18.7 mg. Yield: 81%. TLC (Hexanes:EtOAc, 80:20 v/v): RF = 0.27; <sup>1</sup>H NMR (600 MHz, CDCl<sub>3</sub>): δ 7.80 (d, *J* = 16.2 Hz, 1H), 7.67 (dd, *J* = 7.8, 1.2 Hz, 1H), 7.38 (d, *J* = 7.8 Hz, 1H), 7.32 (t, *J* = 7.8 Hz, 1H), 6.89 (d, *J* = 16.2 Hz, 1H), 4.31 (q, *J* = 7.2 Hz, 2H), 2.71 (s, 3H), 1.38 (t, *J* = 7.2 Hz, 3H); <sup>13</sup>C NMR (151 MHz, CDCl<sub>3</sub>): δ 167.00, 164.16, 149.14, 142.17, 138.84, 126.24, 124.47, 122.02, 121.19, 119.01, 60.69, 14.63, 14.37; HRMS (ESI-TOF) *m/z*: [M+H]<sup>+</sup> calcd. for C<sub>13</sub>H<sub>14</sub>NO<sub>3</sub><sup>+</sup>, 232.0968; found 232.0975.

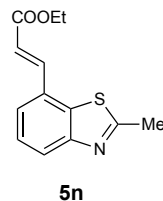

ethyl (*E*)-3-(2-methylbenzo[*d*]thiazol-7-yl)acrylate **5n**. White solid, 16.7 mg. Yield: 68%. TLC (Hexanes:EtOAc, 80:20 v/v): RF = 0.27; <sup>1</sup>H NMR (600 MHz, CDCl<sub>3</sub>): δ 7.99 (dd, *J* = 8.4, 1.2 Hz, 1H), 7.86 (d, *J* = 16.2 Hz, 1H), 7.54 (d, *J* = 7.8 Hz, 1H), 7.49 (t, *J* = 7.8 Hz, 1H), 6.55 (d, *J* =

16.2 Hz, 1H), 4.31 (q,  $J = 7.2$  Hz, 2H), 2.88 (s, 3H), 1.37 (t,  $J = 7.2$  Hz, 3H);  $^{13}\text{C}$  NMR (151 MHz,  $\text{CDCl}_3$ ):  $\delta$  167.17, 166.70, 154.43, 142.57, 134.53, 128.92, 126.28, 126.23, 124.17, 120.56, 60.79, 20.09, 14.34; HRMS (ESI-TOF)  $m/z$ :  $[\text{M}+\text{H}]^+$  calcd. for  $\text{C}_{13}\text{H}_{14}\text{NO}_2\text{S}^+$ , 248.0740; found 248.0749.

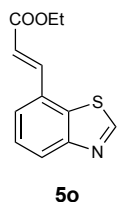

ethyl (*E*)-3-(benzo[*d*]thiazol-7-yl)acrylate **5o**. White solid, 11.3 mg. Yield: 51%. TLC (Hexanes:EtOAc, 80:20 v/v): RF = 0.27;  $^1\text{H}$  NMR (600 MHz,  $\text{CDCl}_3$ ):  $\delta$  9.08 (s, 1H), 8.19 (dd,  $J = 7.8, 0.6$  Hz, 1H), 7.93 (d,  $J = 16.2$  Hz, 1H), 7.65 (d,  $J = 7.2$  Hz, 1H), 7.58 (dd,  $J = 7.8, 7.2$  Hz, 1H), 6.61 (d,  $J = 16.2$  Hz, 1H), 4.32 (q,  $J = 7.2$  Hz, 2H), 1.38 (t,  $J = 7.2$  Hz, 3H);  $^{13}\text{C}$  NMR (151 MHz,  $\text{CDCl}_3$ ):  $\delta$  166.61, 154.30, 154.04, 142.32, 132.66, 129.40, 126.95, 126.57, 125.44, 120.86, 60.87, 14.34; HRMS (ESI-TOF)  $m/z$ :  $[\text{M}+\text{H}]^+$  calcd. for  $\text{C}_{12}\text{H}_{12}\text{NO}_2\text{S}^+$ , 234.0583; found 234.0594.

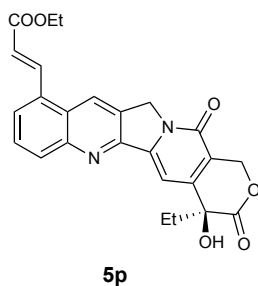

ethyl (*S,E*)-3-(4-ethyl-4-hydroxy-3,14-dioxo-3,4,12,14-tetrahydro-1*H*-pyrano[3',4':6,7]indolizino[1,2-*b*]quinolin-10-yl)acrylate **5p**. Pale yellow solid, 21.9 mg. Yield: 49%. TLC ( $\text{CH}_2\text{Cl}_2$ :MeOH, 90:10 v/v): RF = 0.41;  $^1\text{H}$  NMR (600 MHz,  $\text{DMSO-}d_6$ ):  $\delta$  9.10 (s, 1H), 8.47 (d,  $J = 15.7$  Hz, 1H), 8.26 (d,  $J = 8.4$  Hz, 1H), 8.18 (d,  $J = 7.3$  Hz, 1H), 7.91 (dd,  $J = 8.5, 7.4$  Hz, 1H), 7.37 (s, 1H), 6.82 (d,  $J = 15.7$  Hz, 1H), 6.55 (s, 1H), 5.44 (s, 2H), 5.31 (s, 2H), 4.28 (q,  $J = 7.1$  Hz, 2H), 1.94–1.83 (m, 2H), 1.33 (t,  $J = 7.1$  Hz, 3H), 0.89 (t,  $J = 7.3$  Hz, 3H);  $^{13}\text{C}$  NMR (151 MHz,  $\text{DMSO-}d_6$ ):  $\delta$  172.44, 165.88, 156.83, 152.83, 149.95, 148.11, 145.20, 139.36, 131.91, 131.38, 130.67, 130.03, 127.72, 126.62, 126.09, 122.20, 119.37, 96.94, 72.36, 65.26, 60.39,

50.56, 30.30, 14.25, 7.77; HRMS (ESI-TOF)  $m/z$ :  $[M+H]^+$  calcd. for  $C_{25}H_{23}N_2O_6^+$ , 447.1551; found 447.1552.

## 9. NMR Spectra

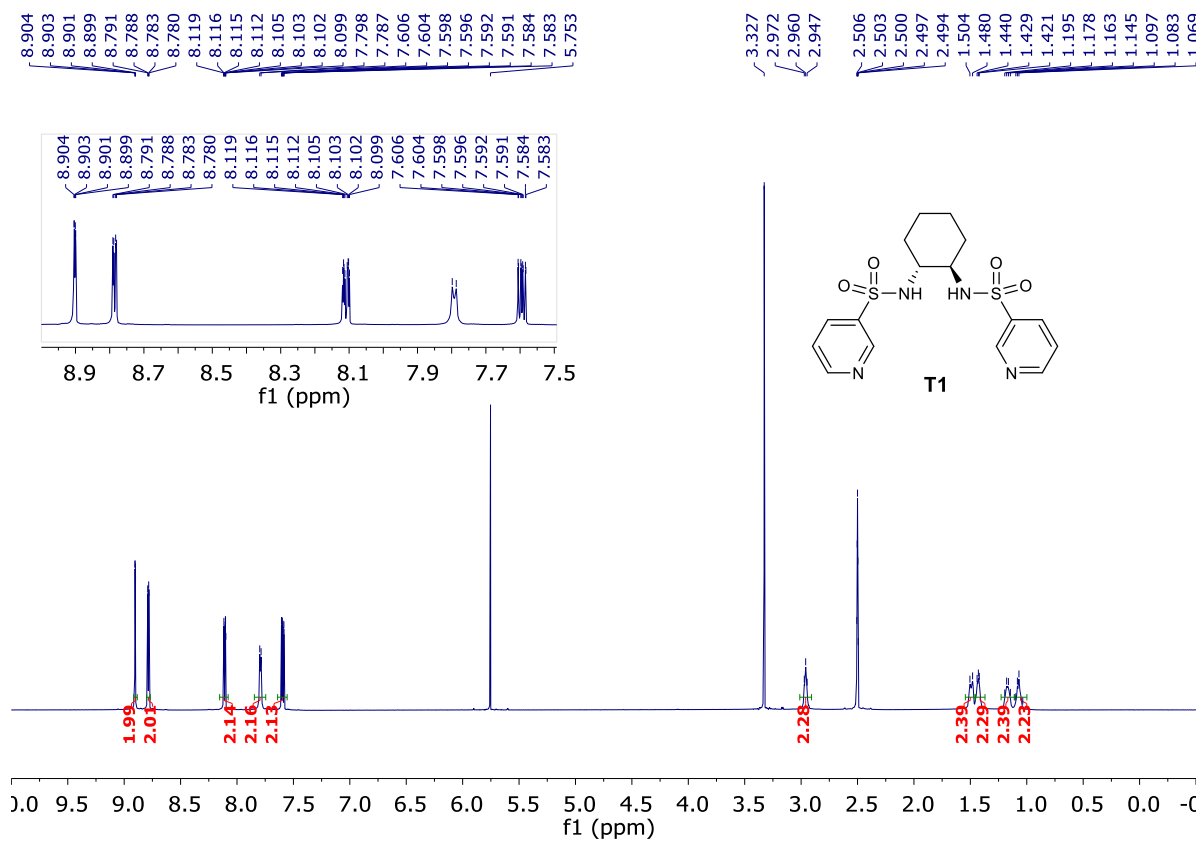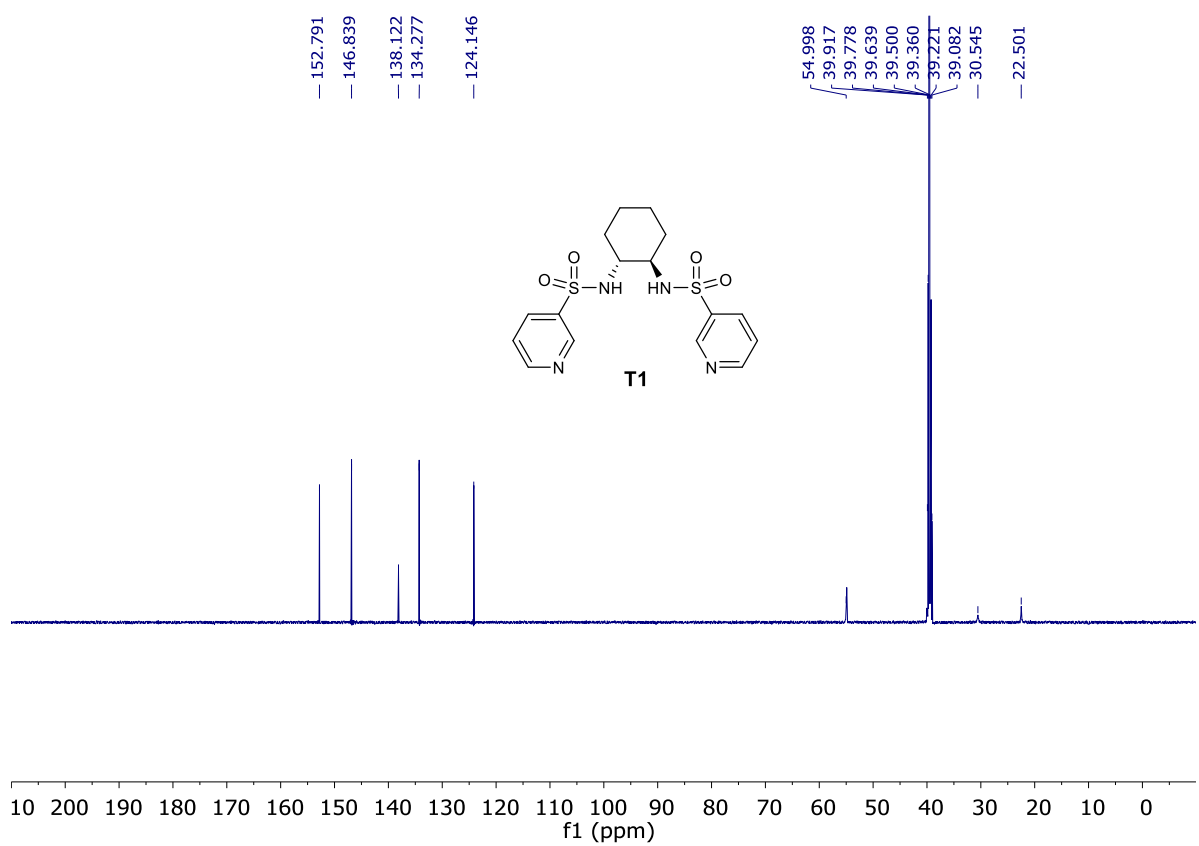

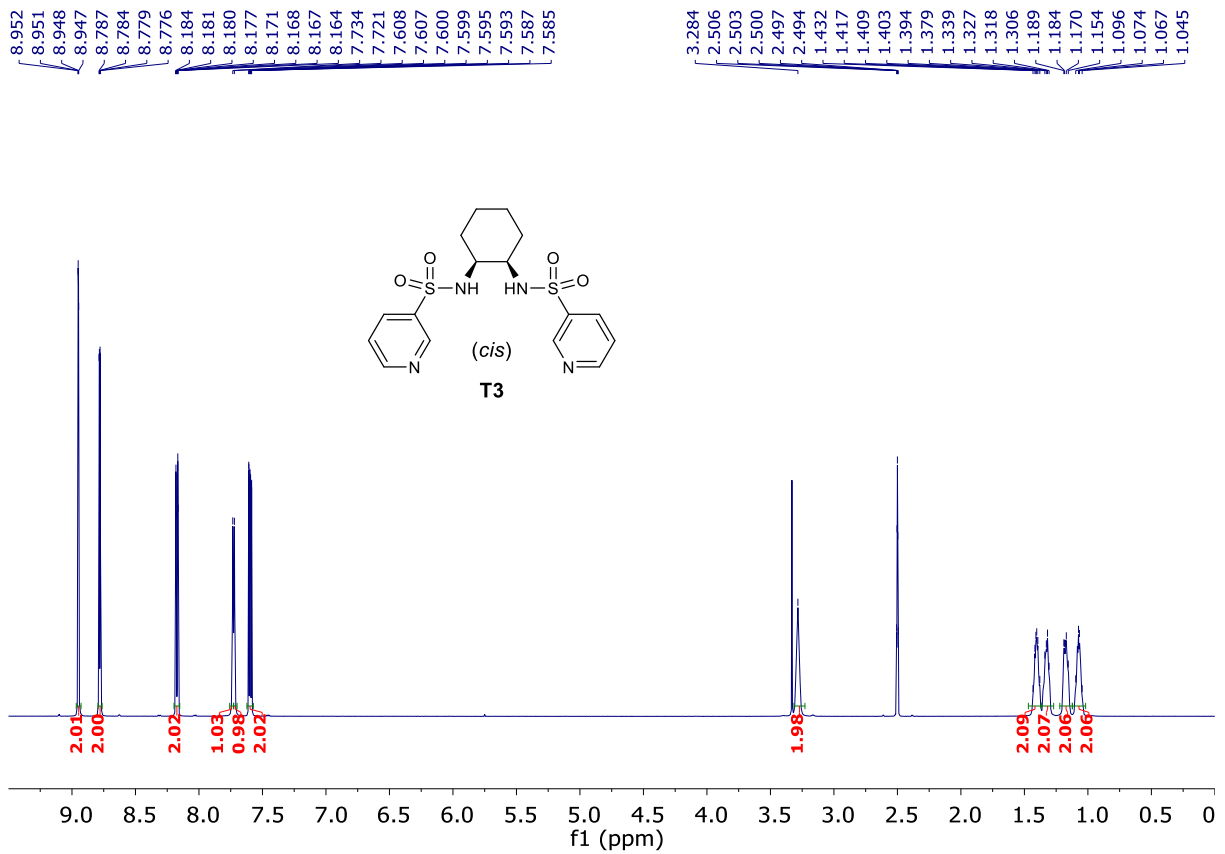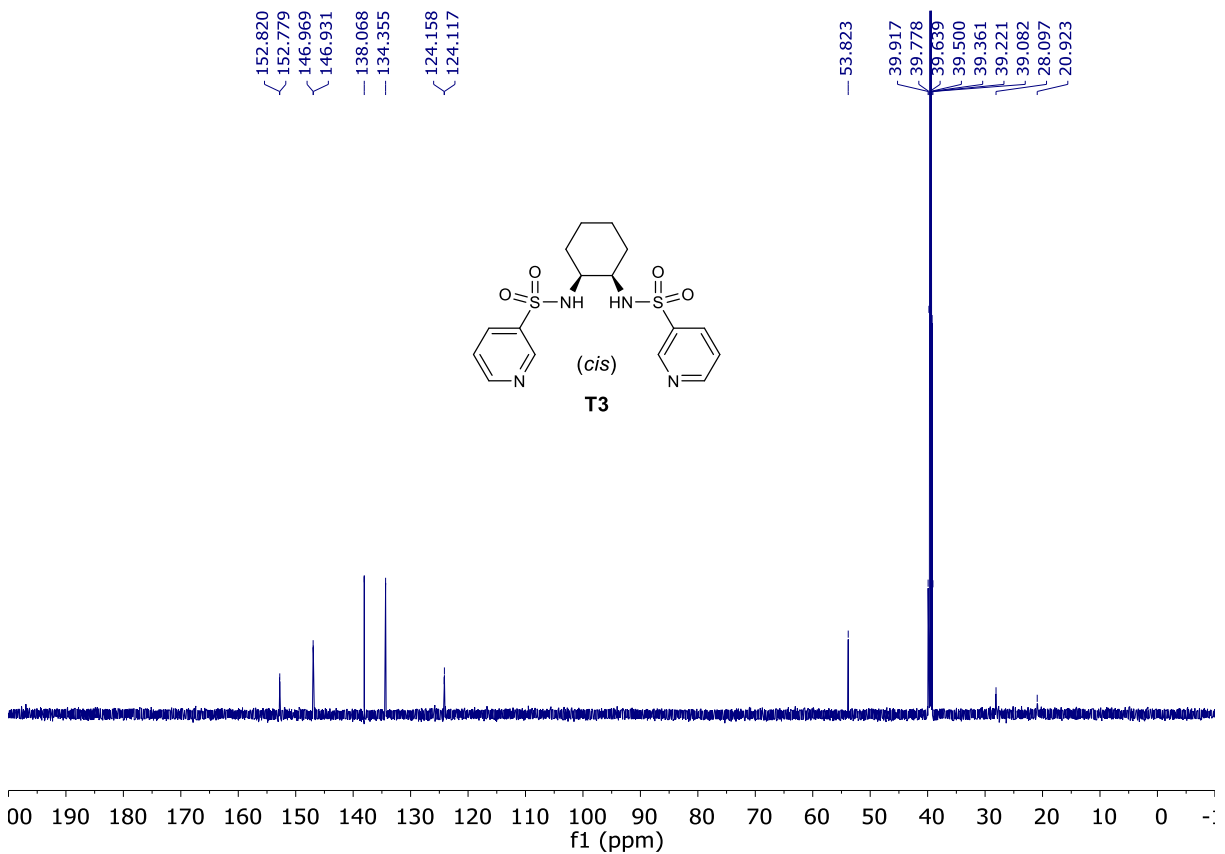

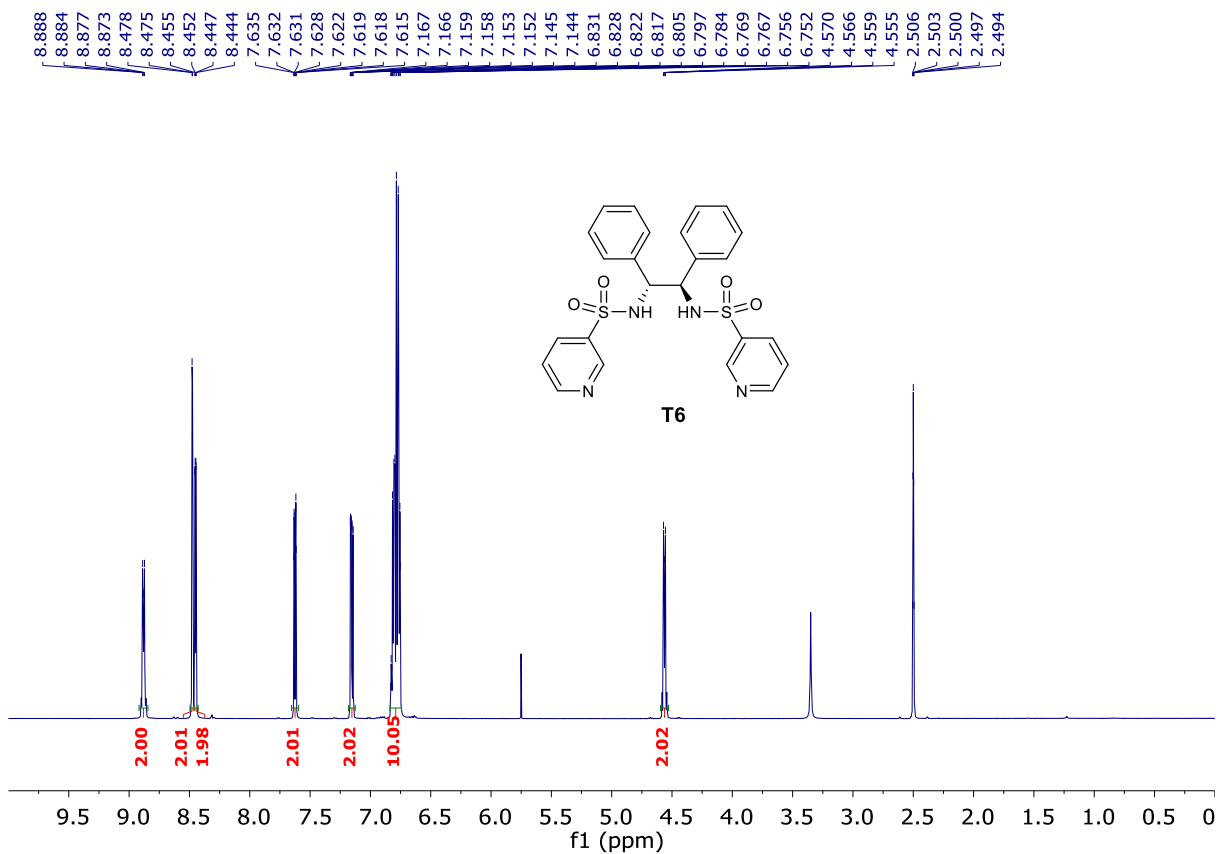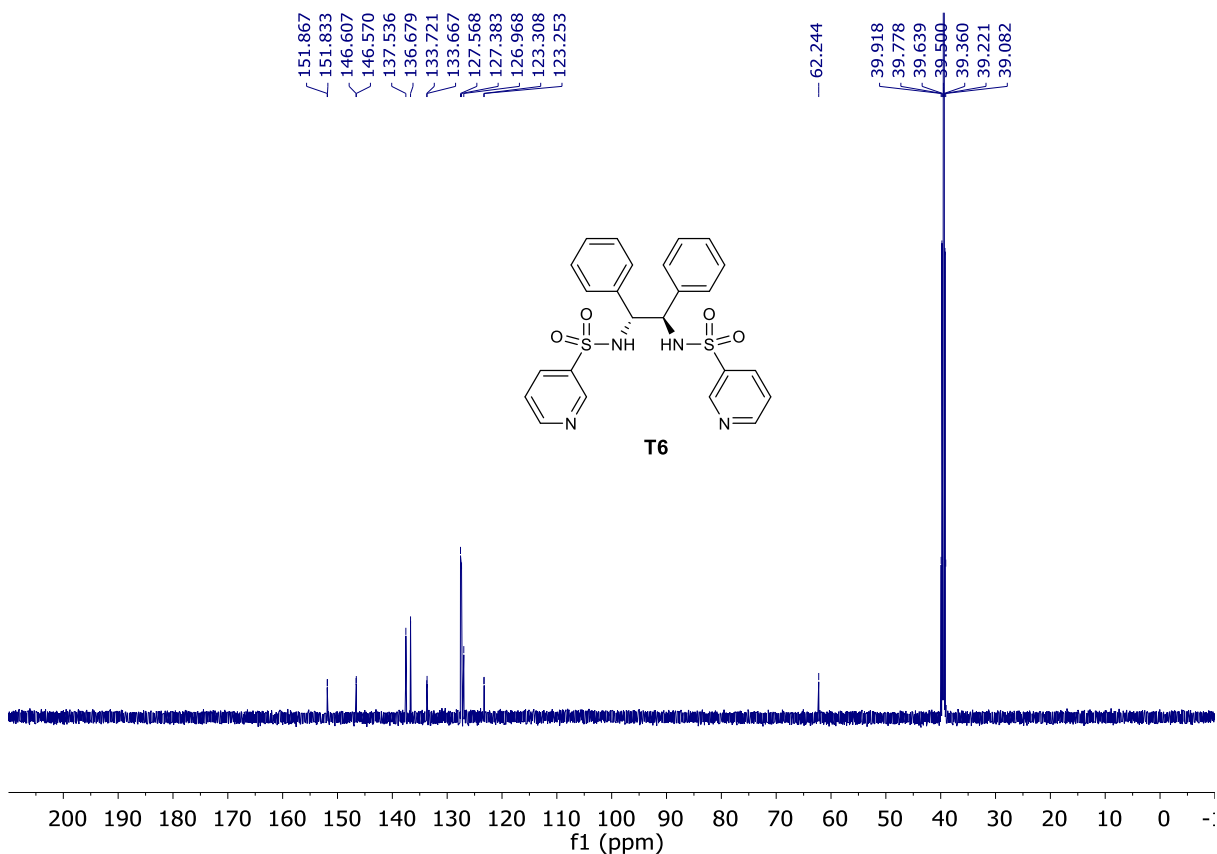



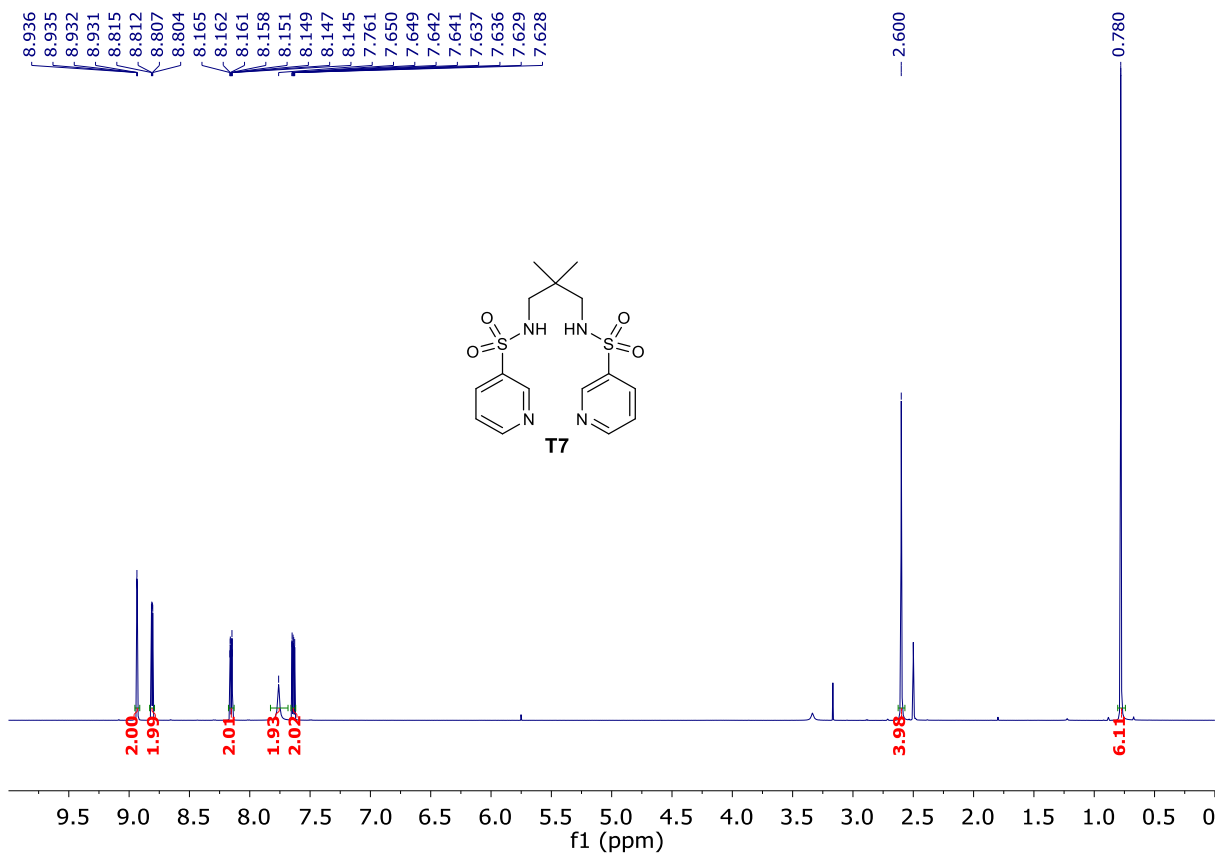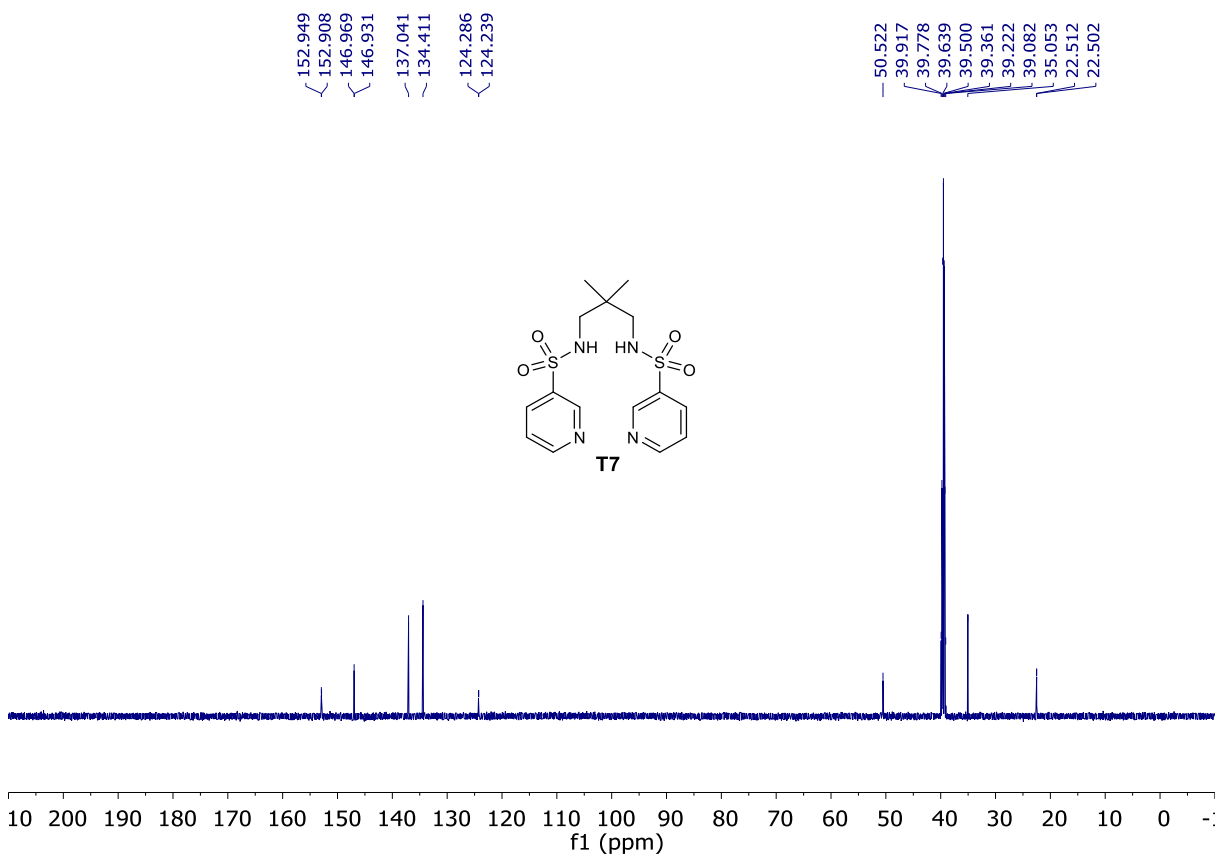

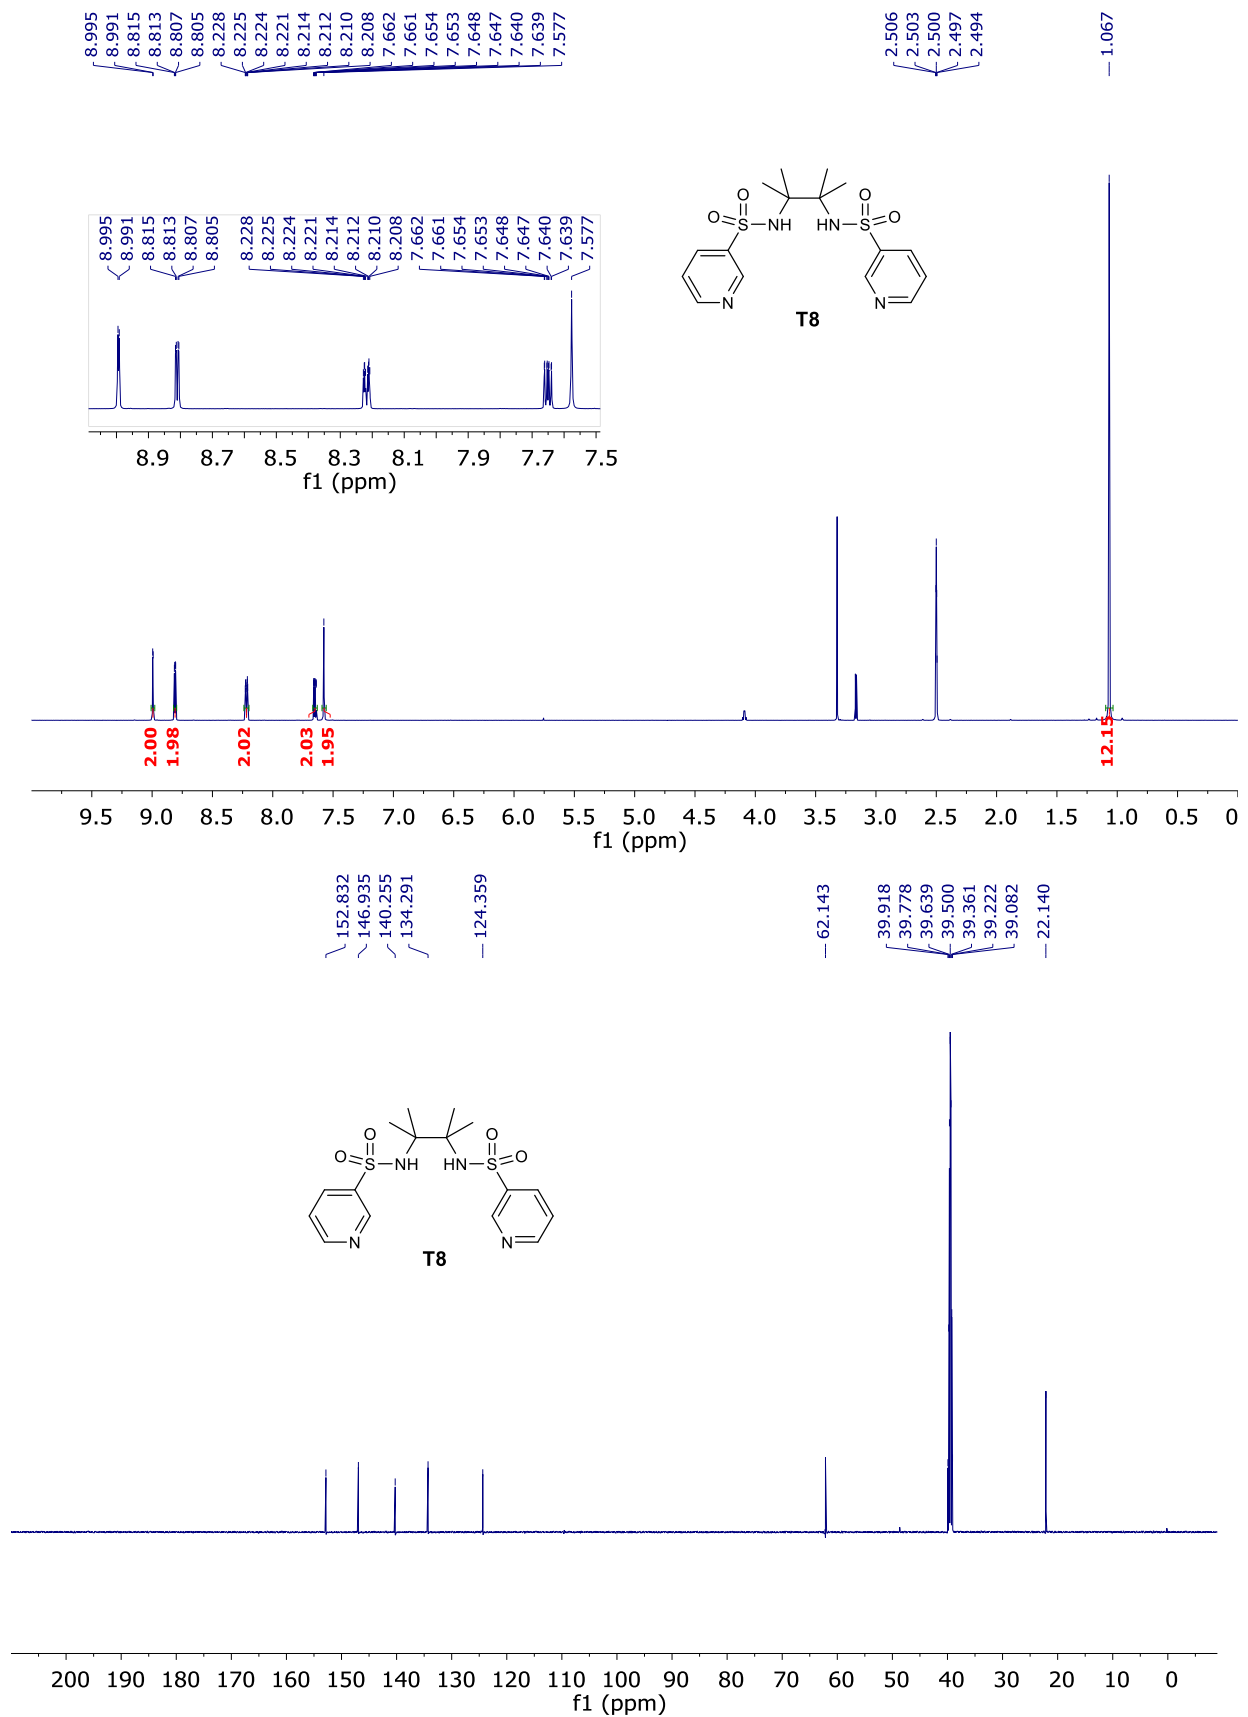

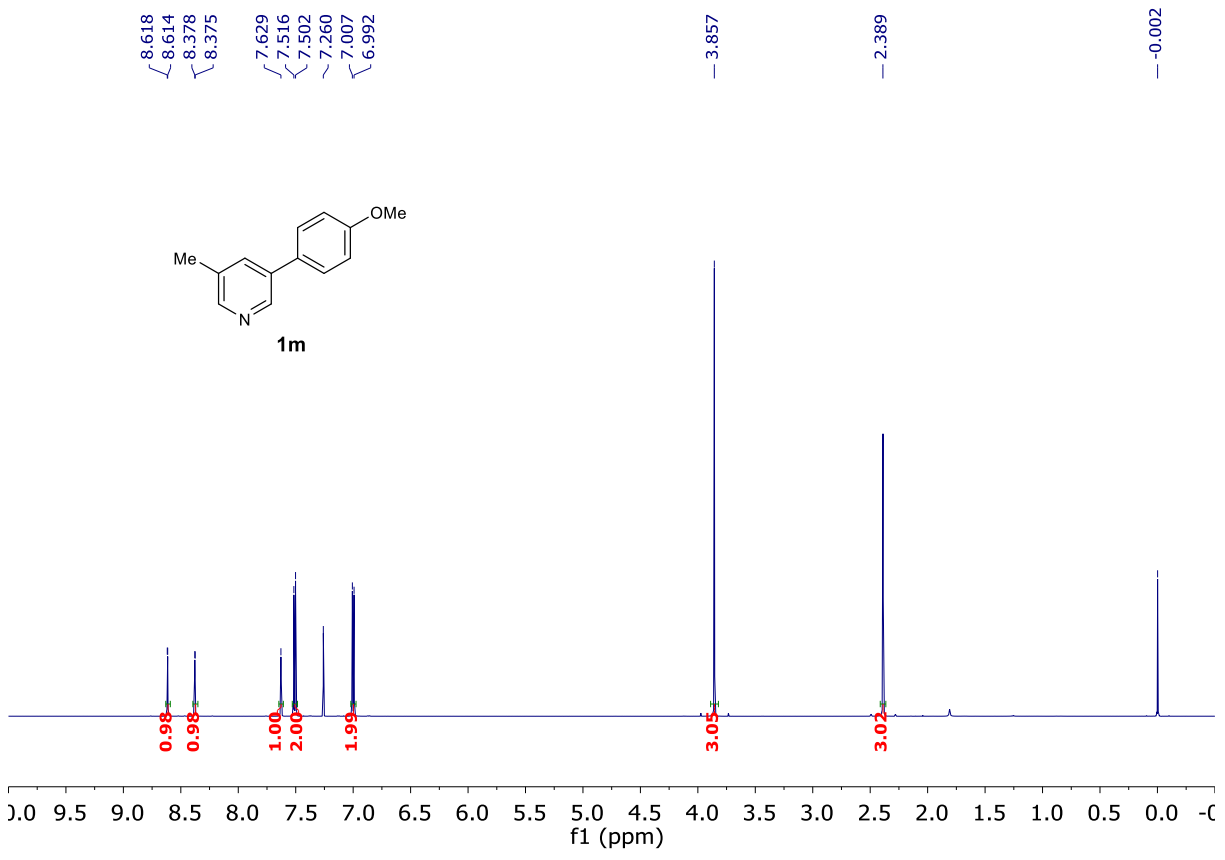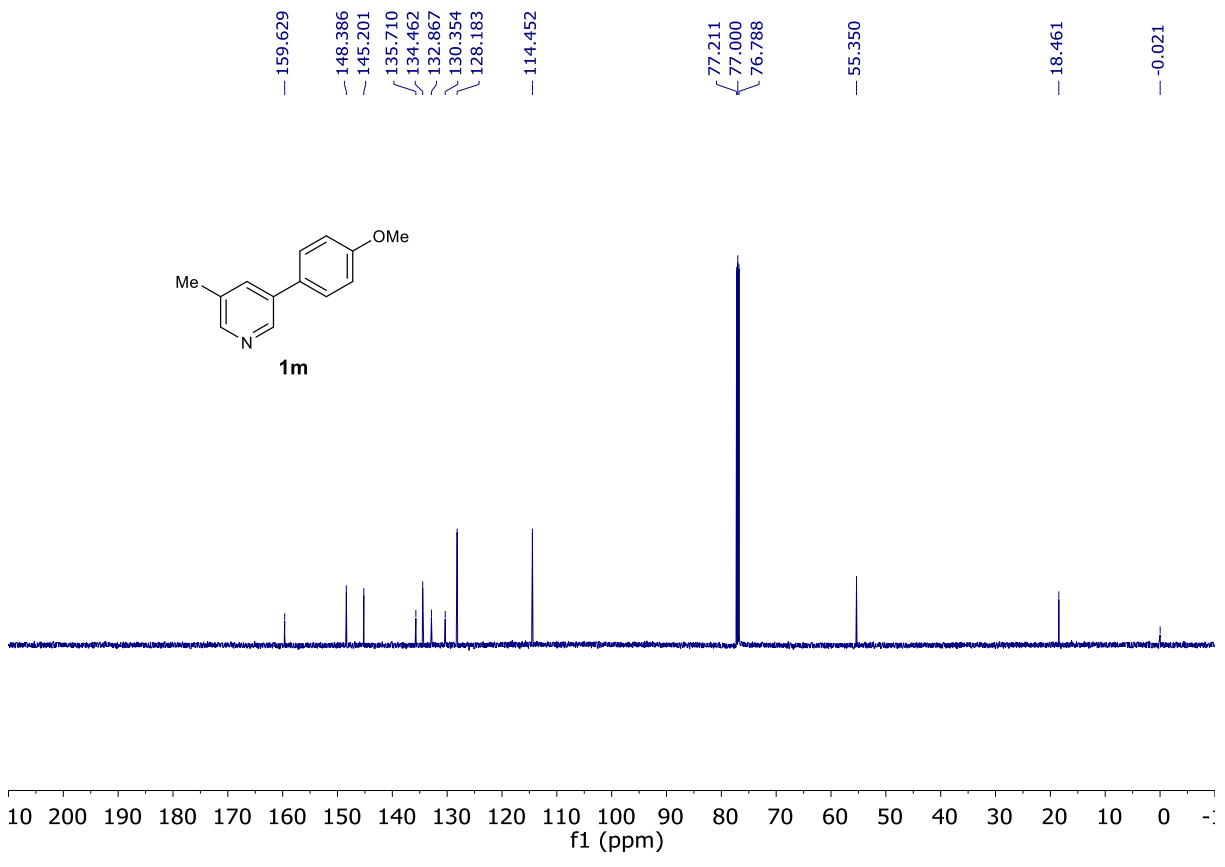

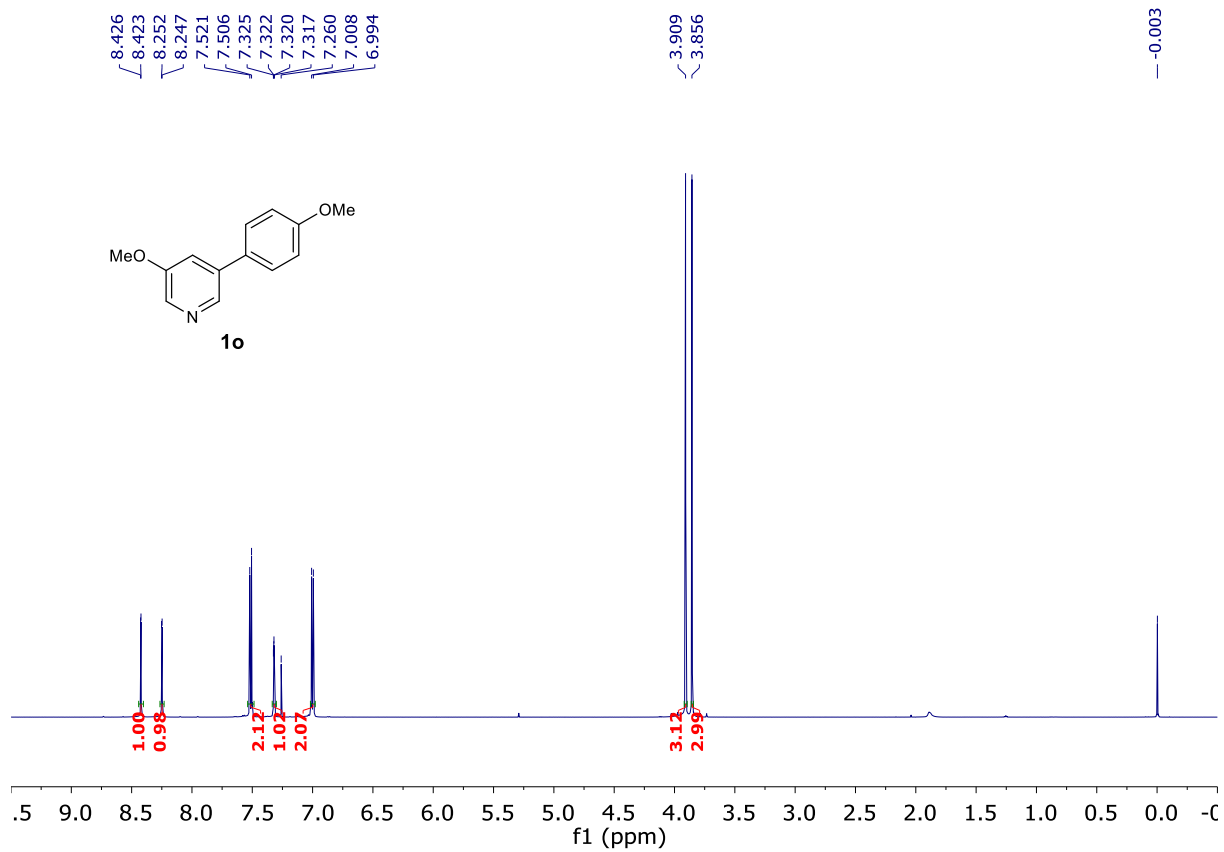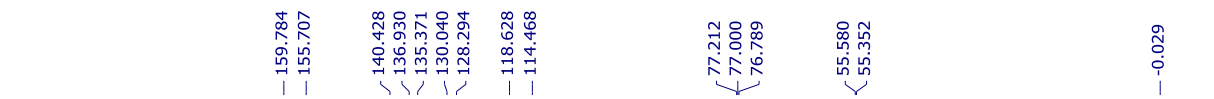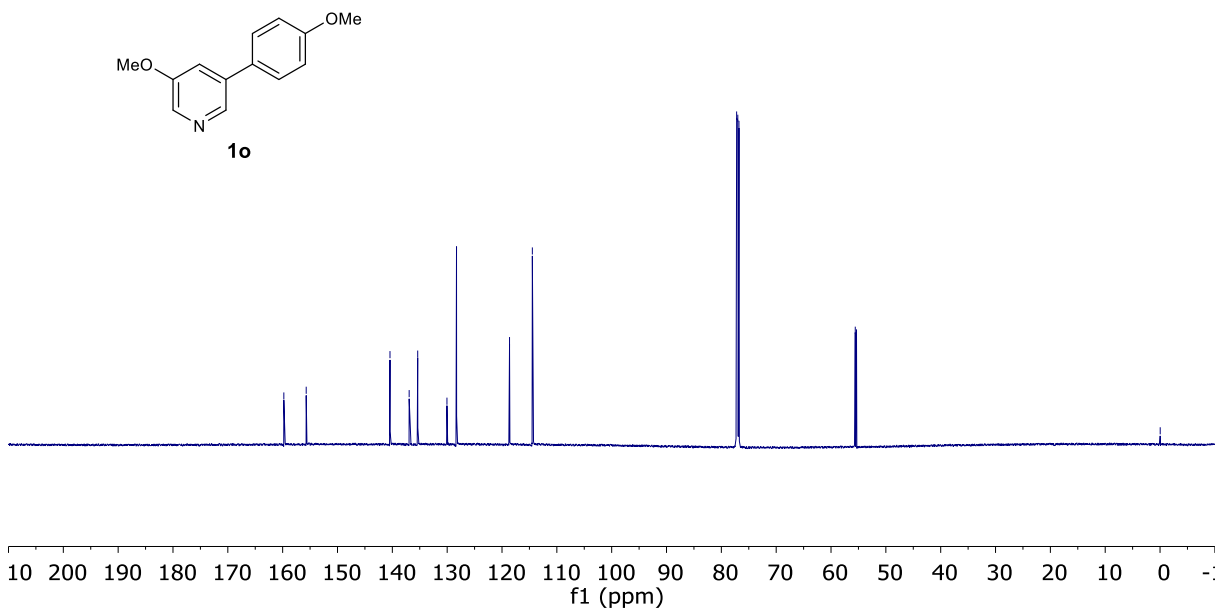

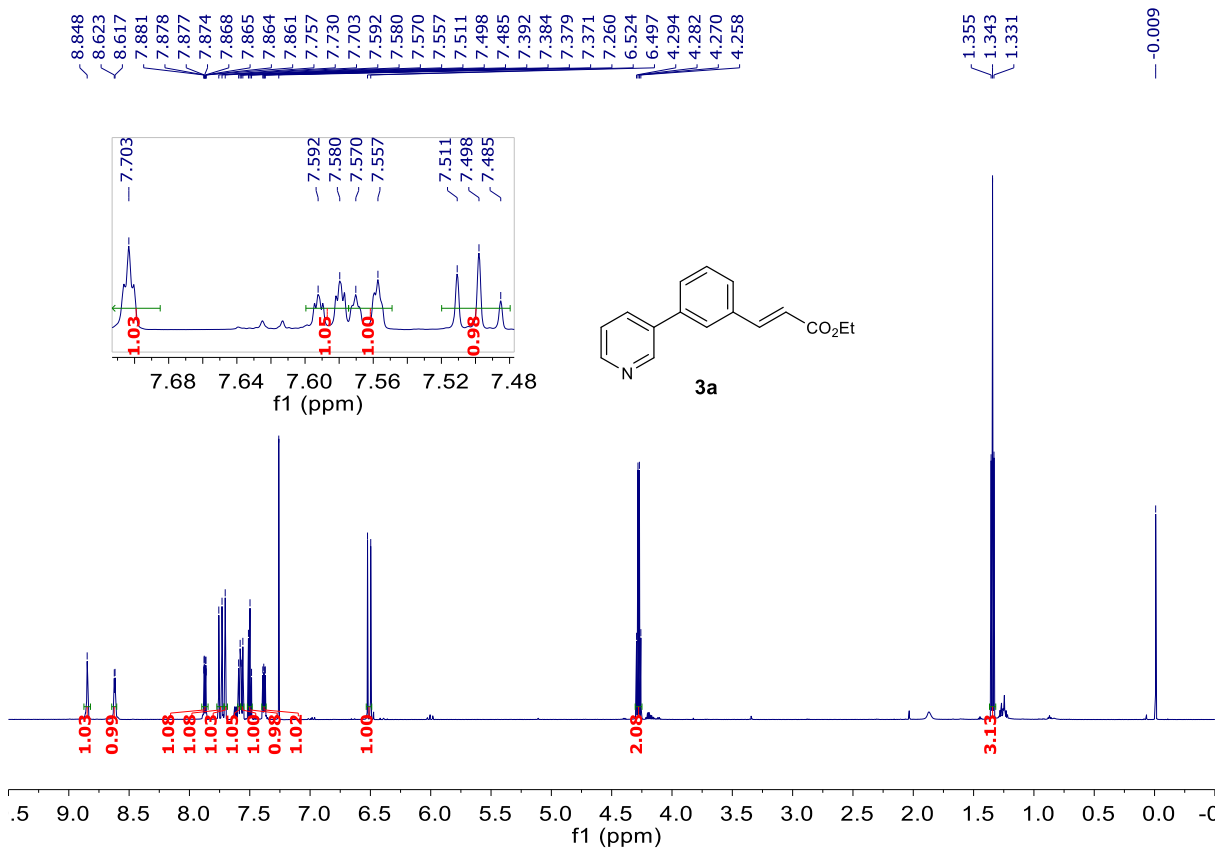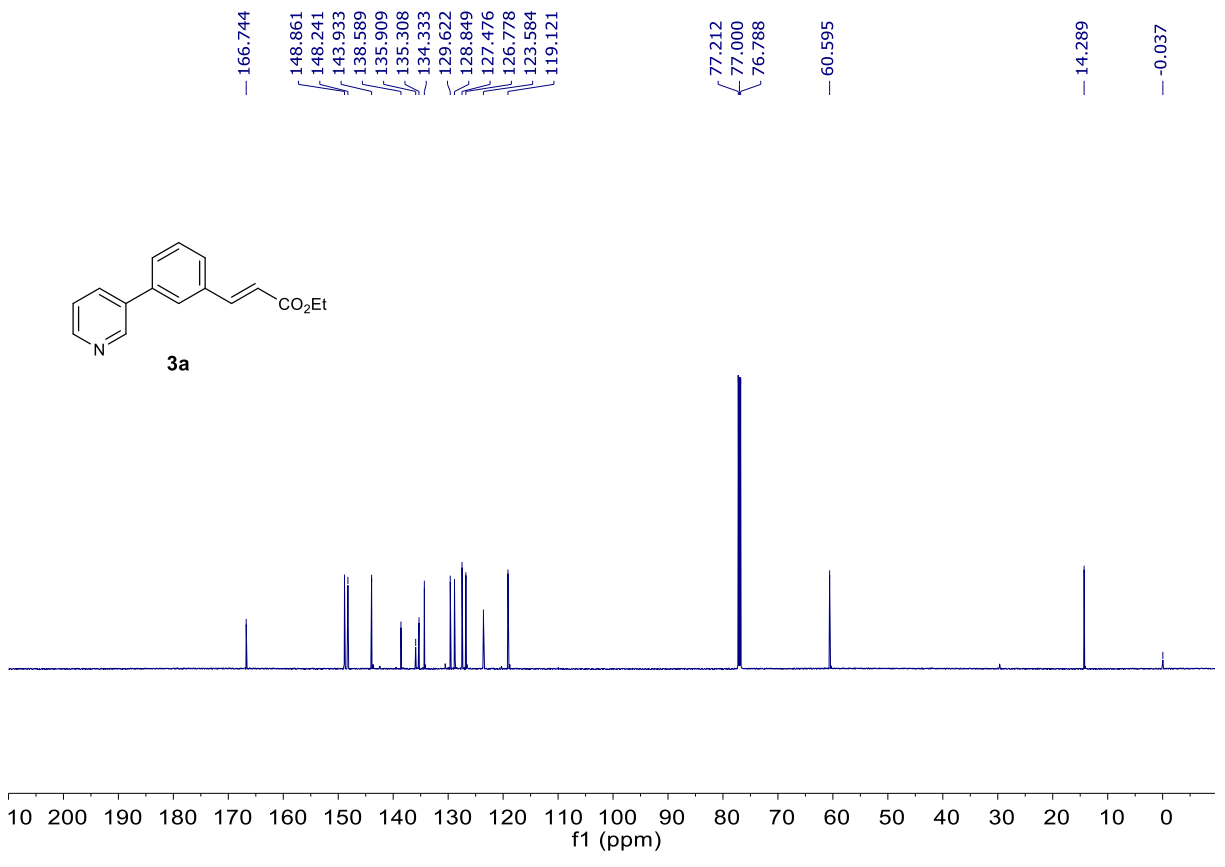

## 2D NOESY of compound 3a

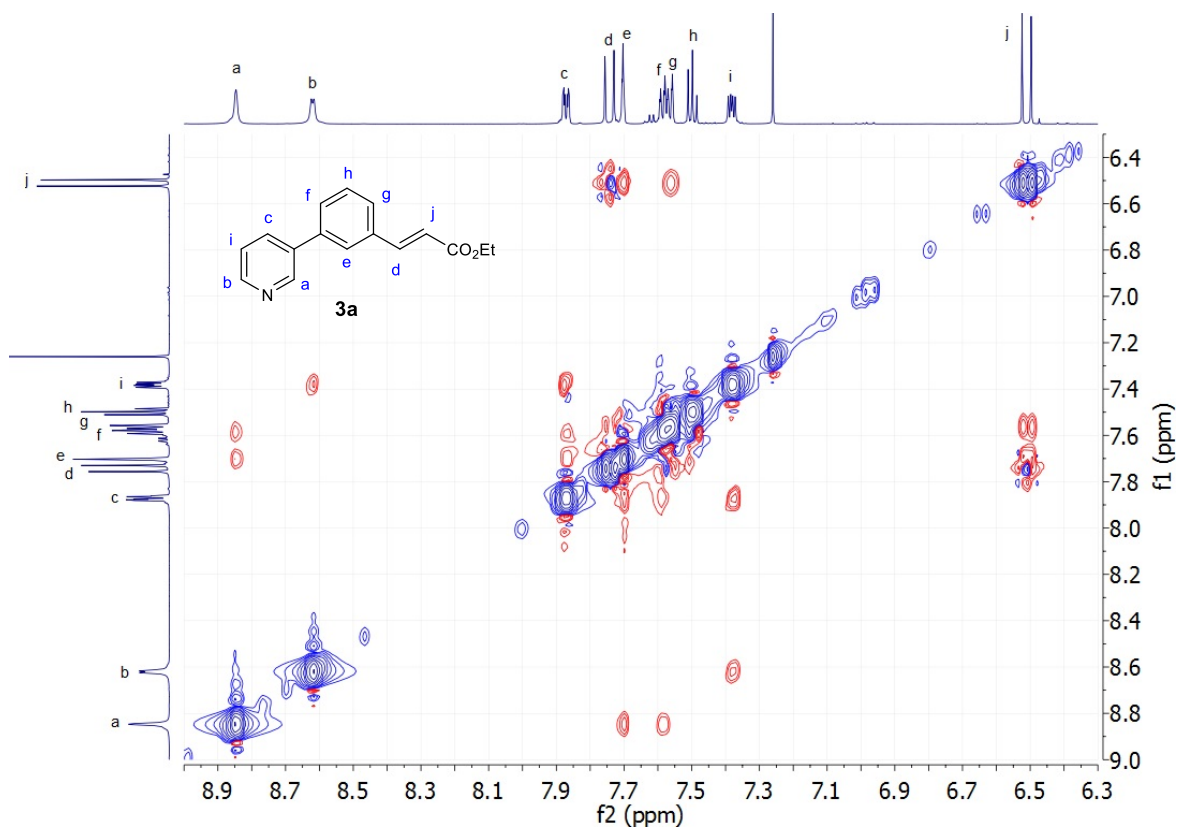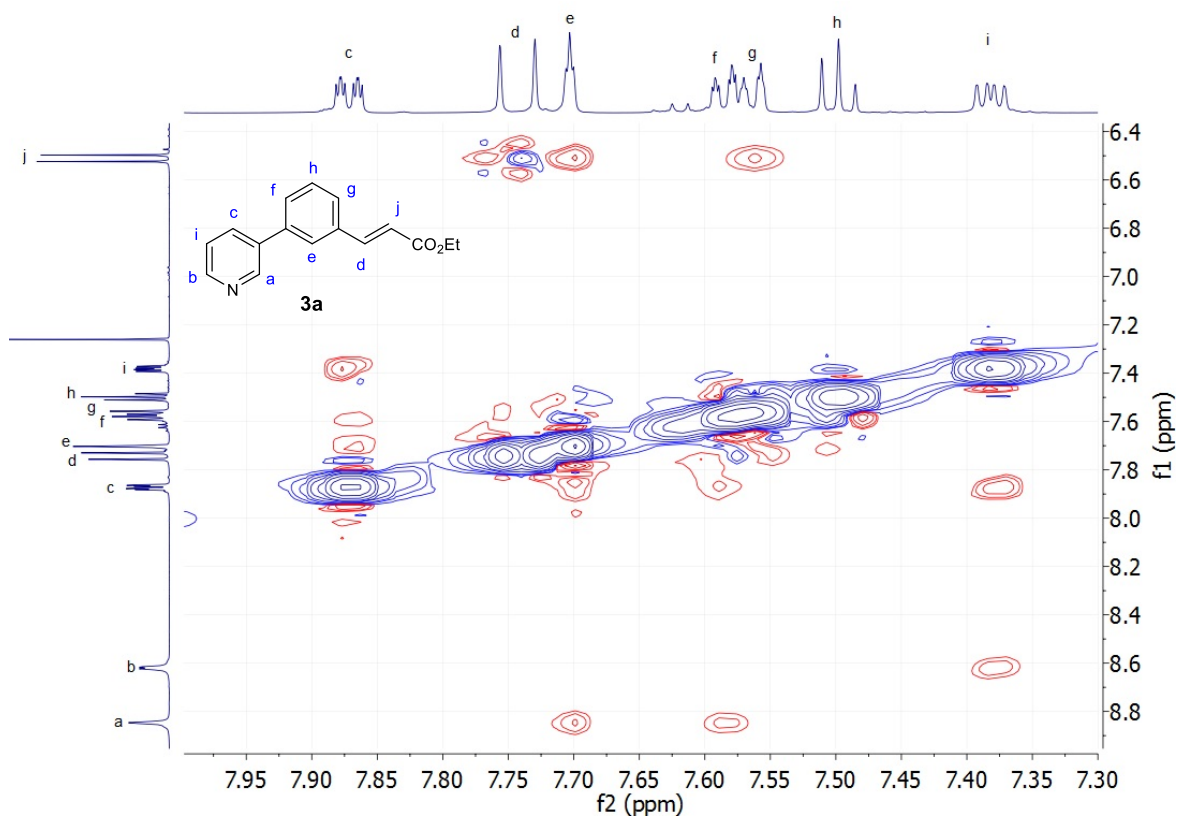

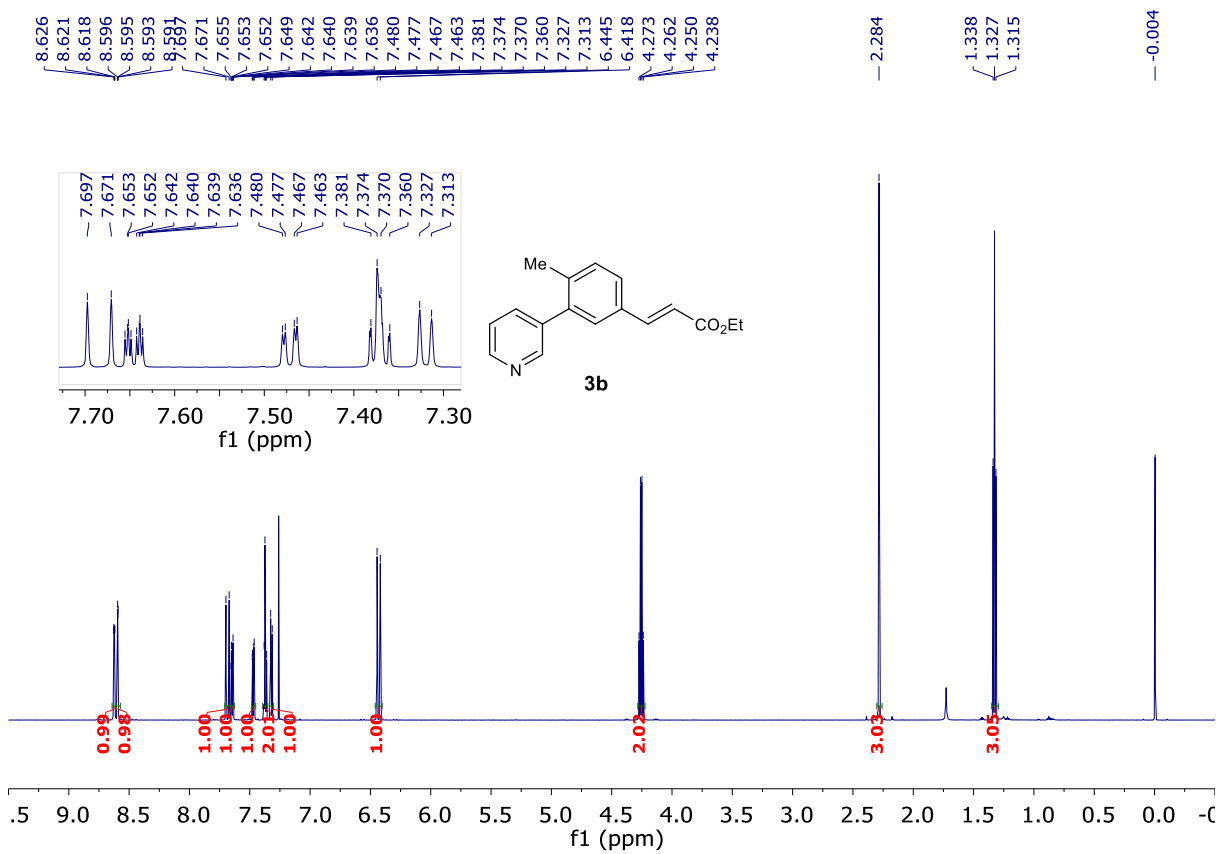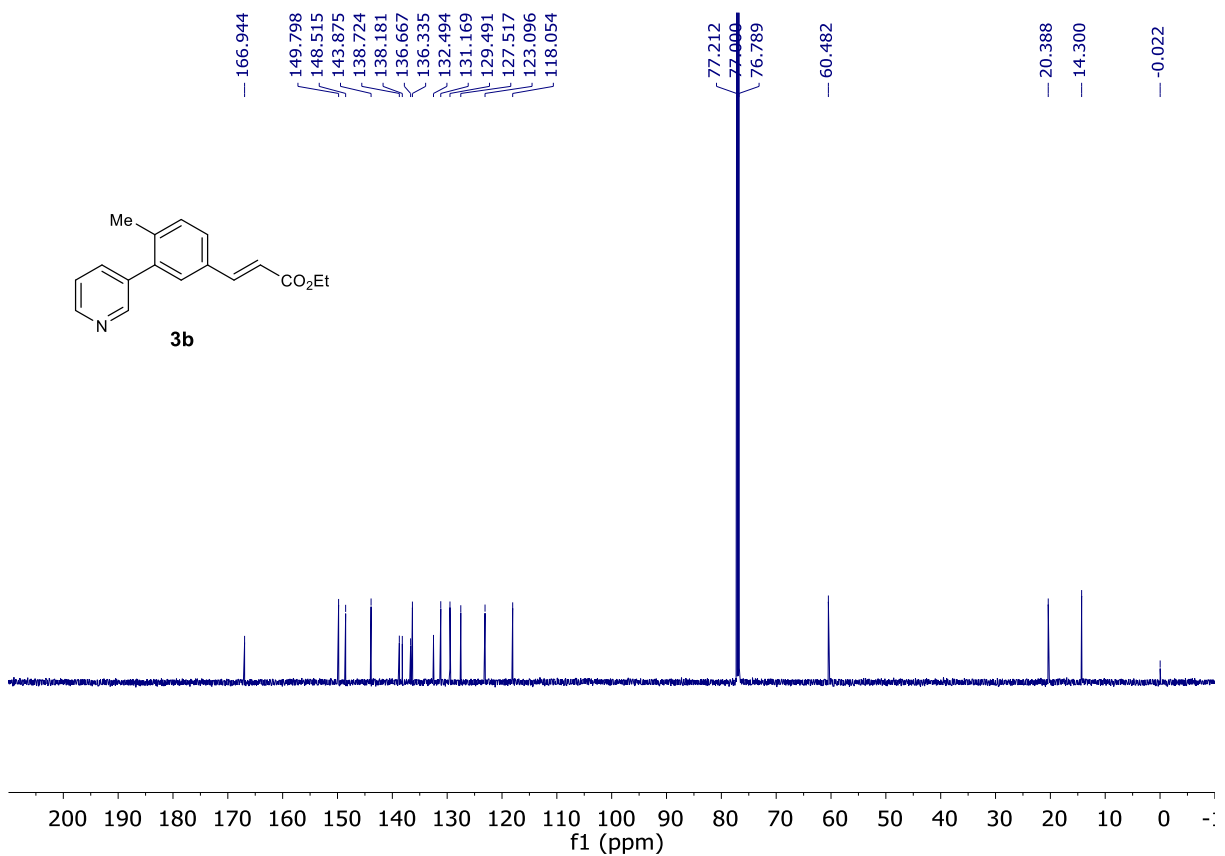

2D NOESY of compound **3b**

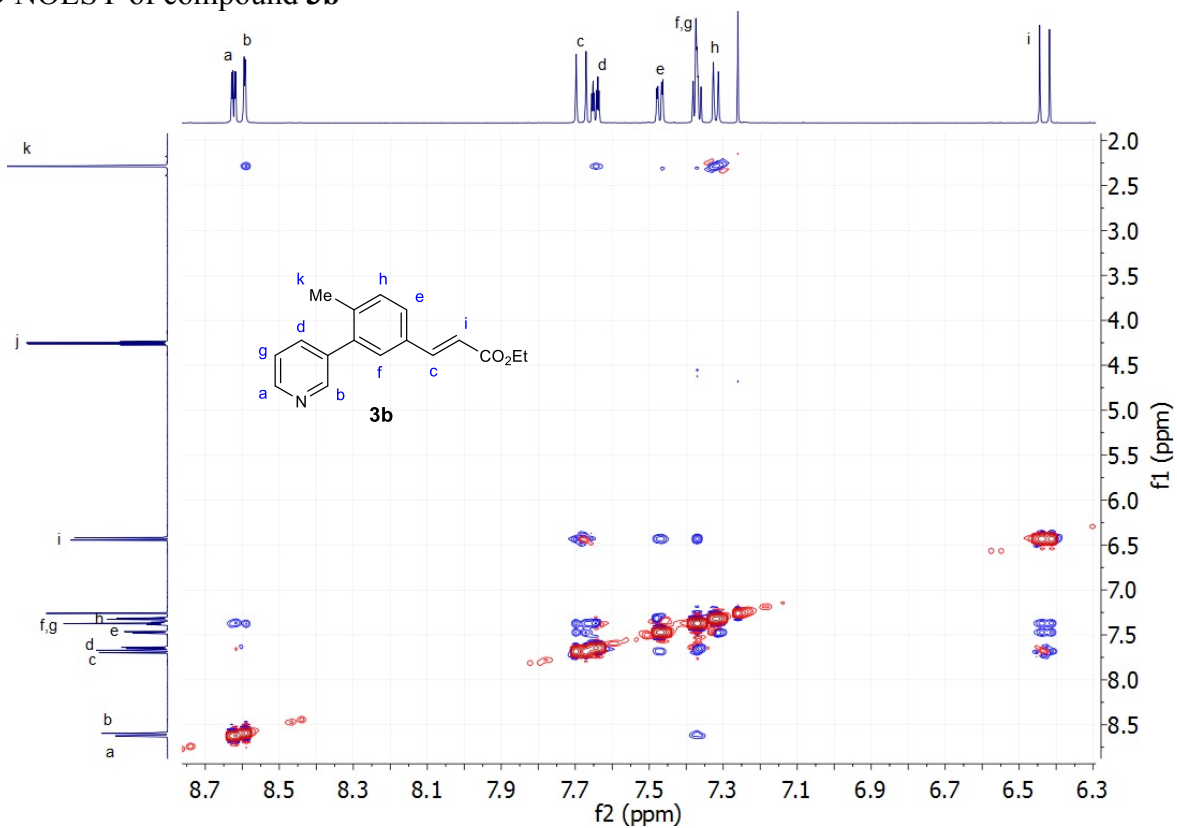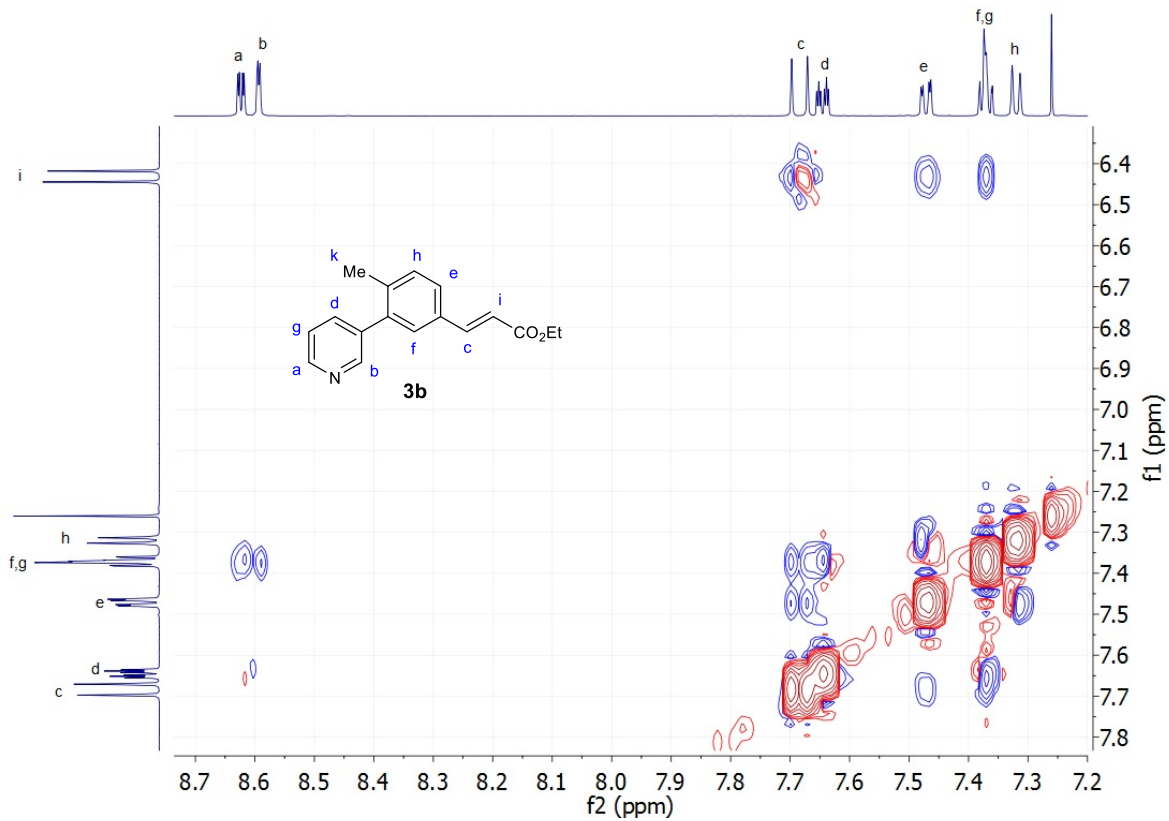



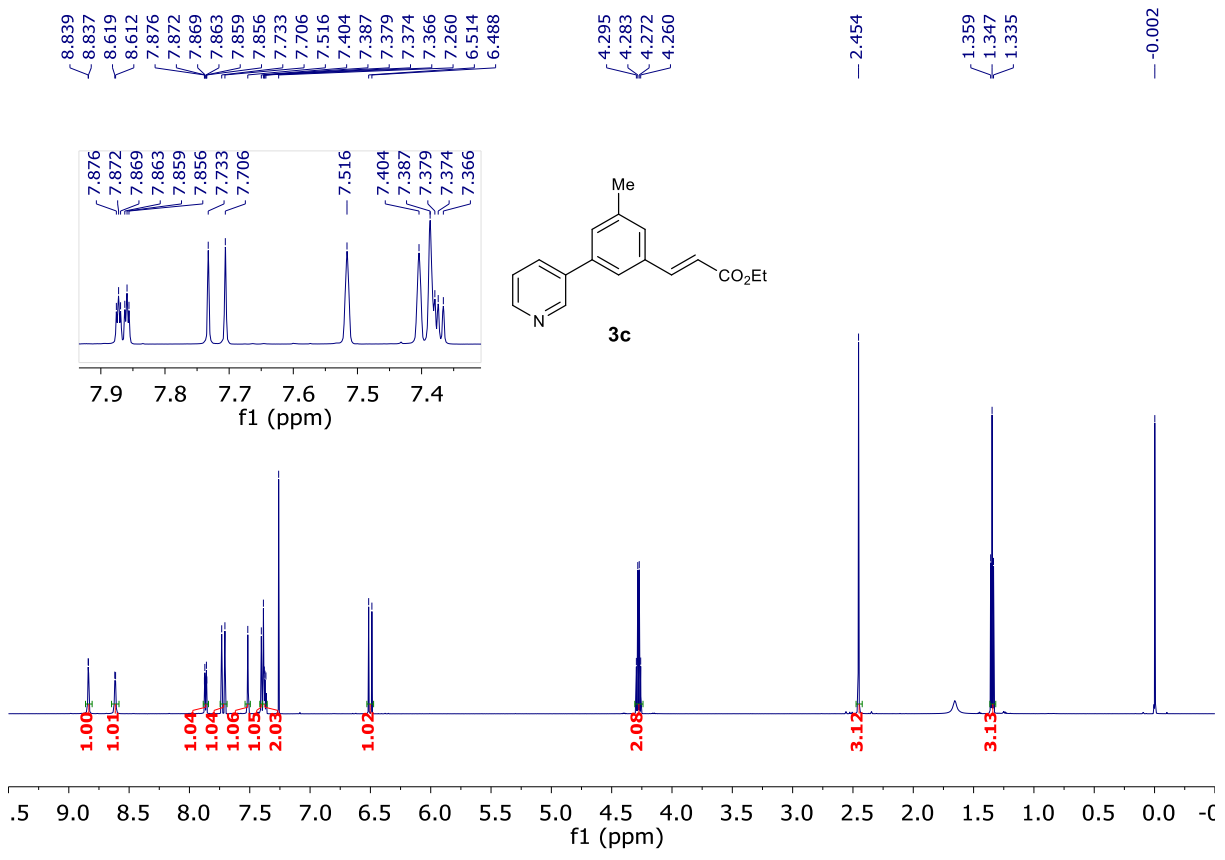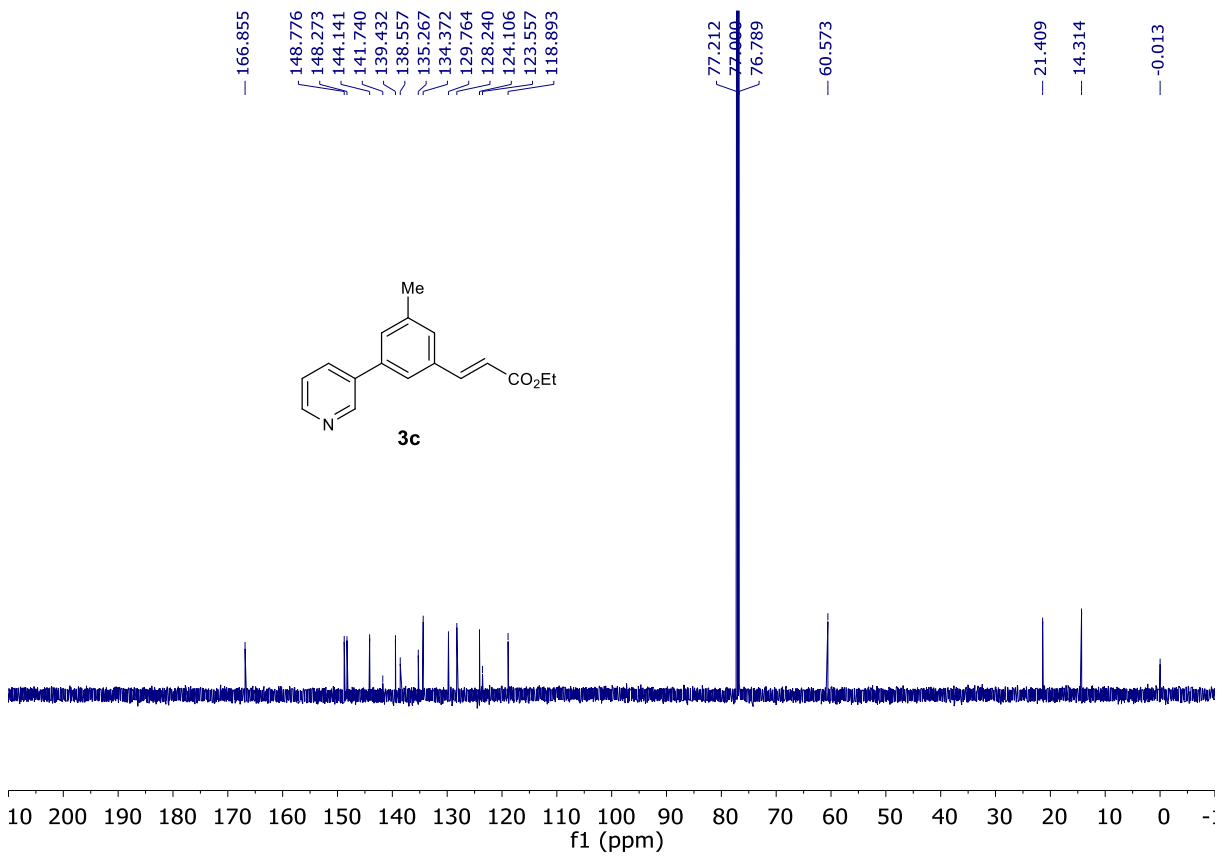

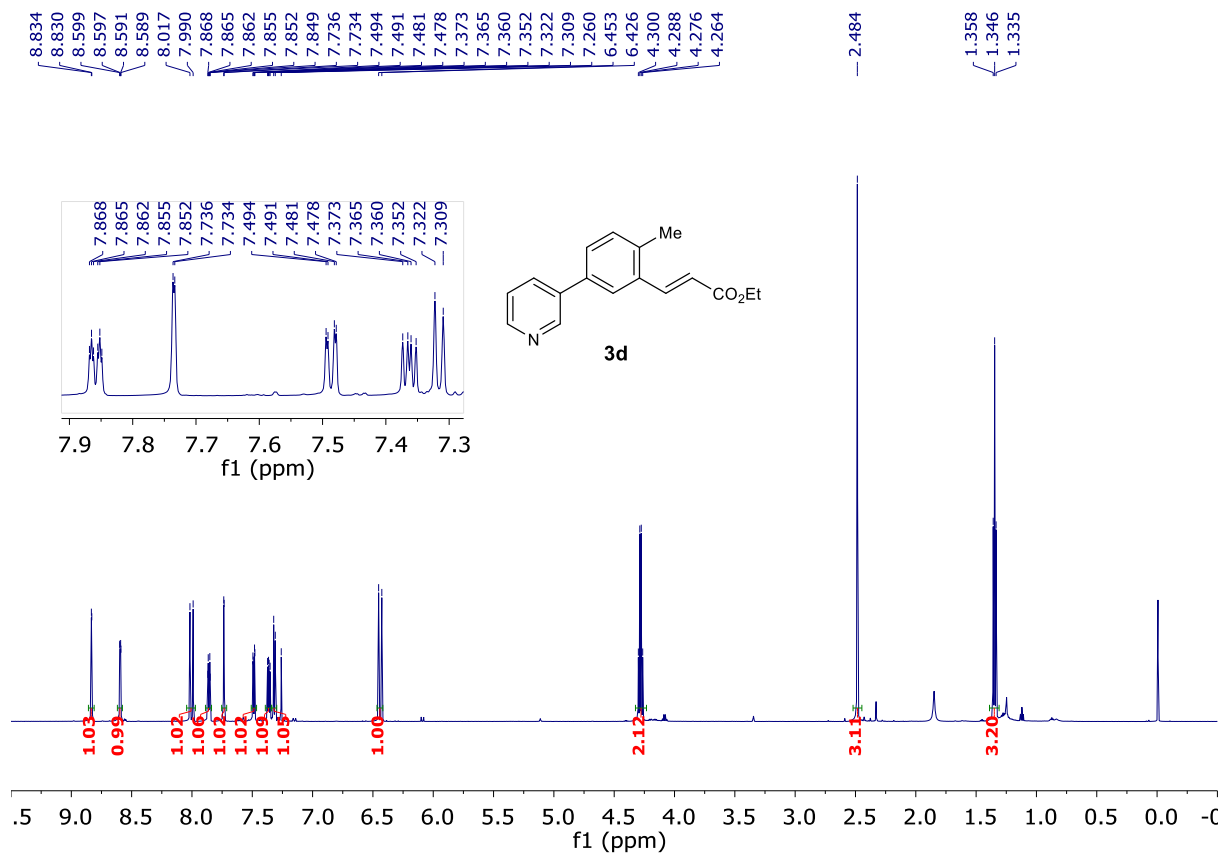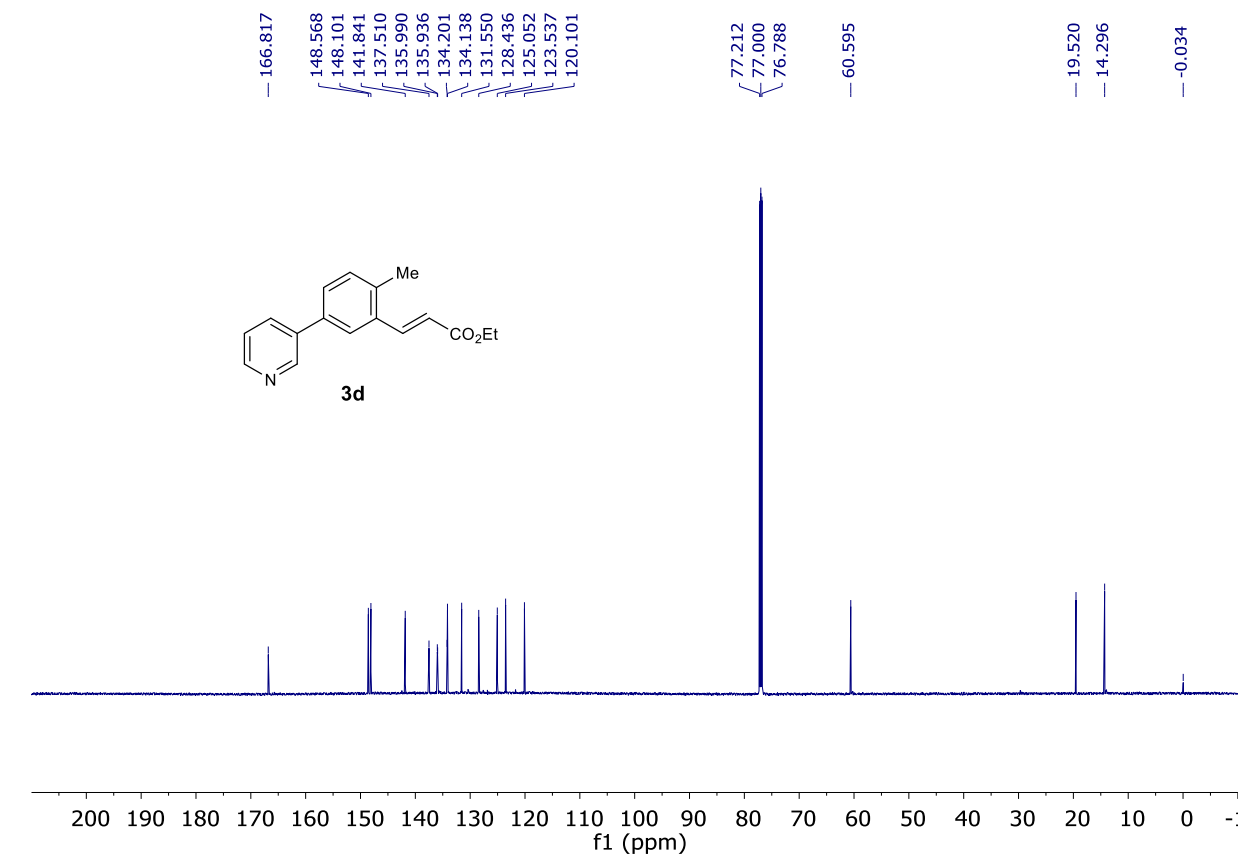

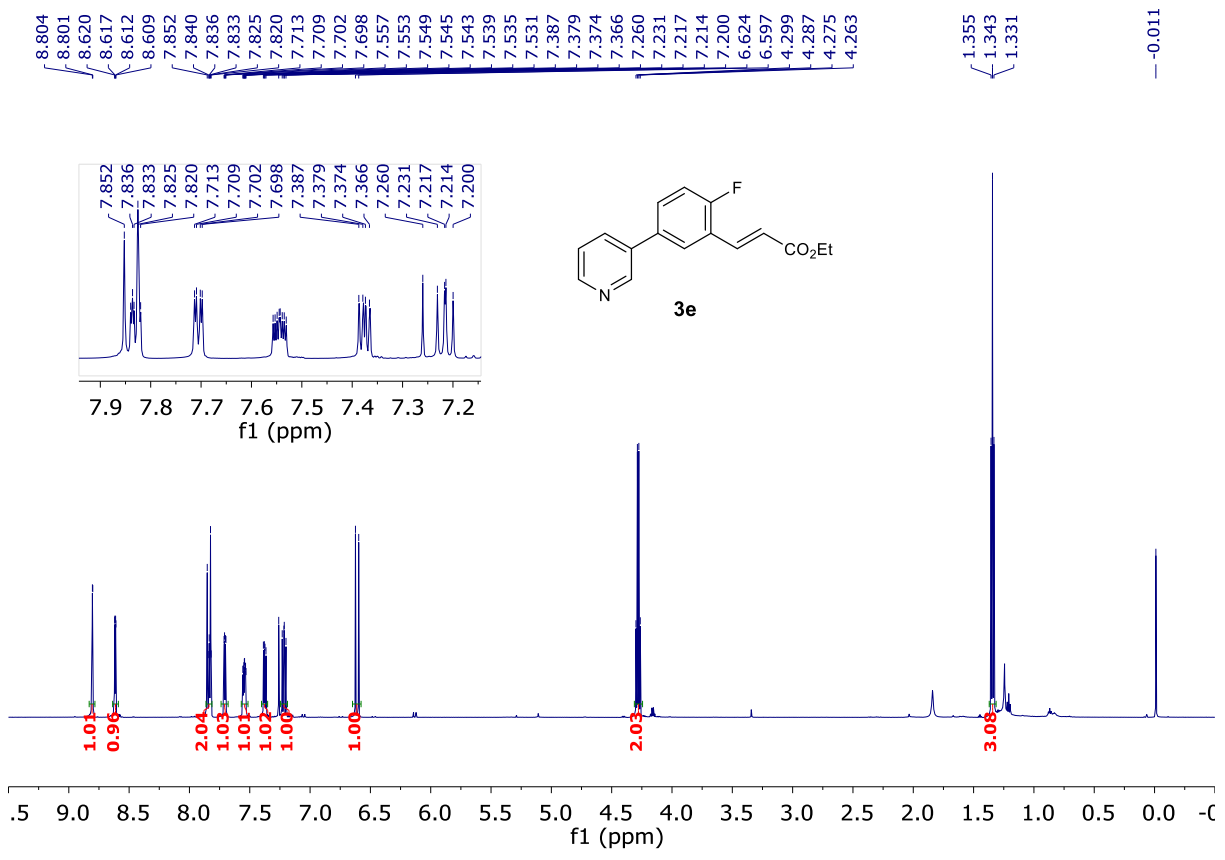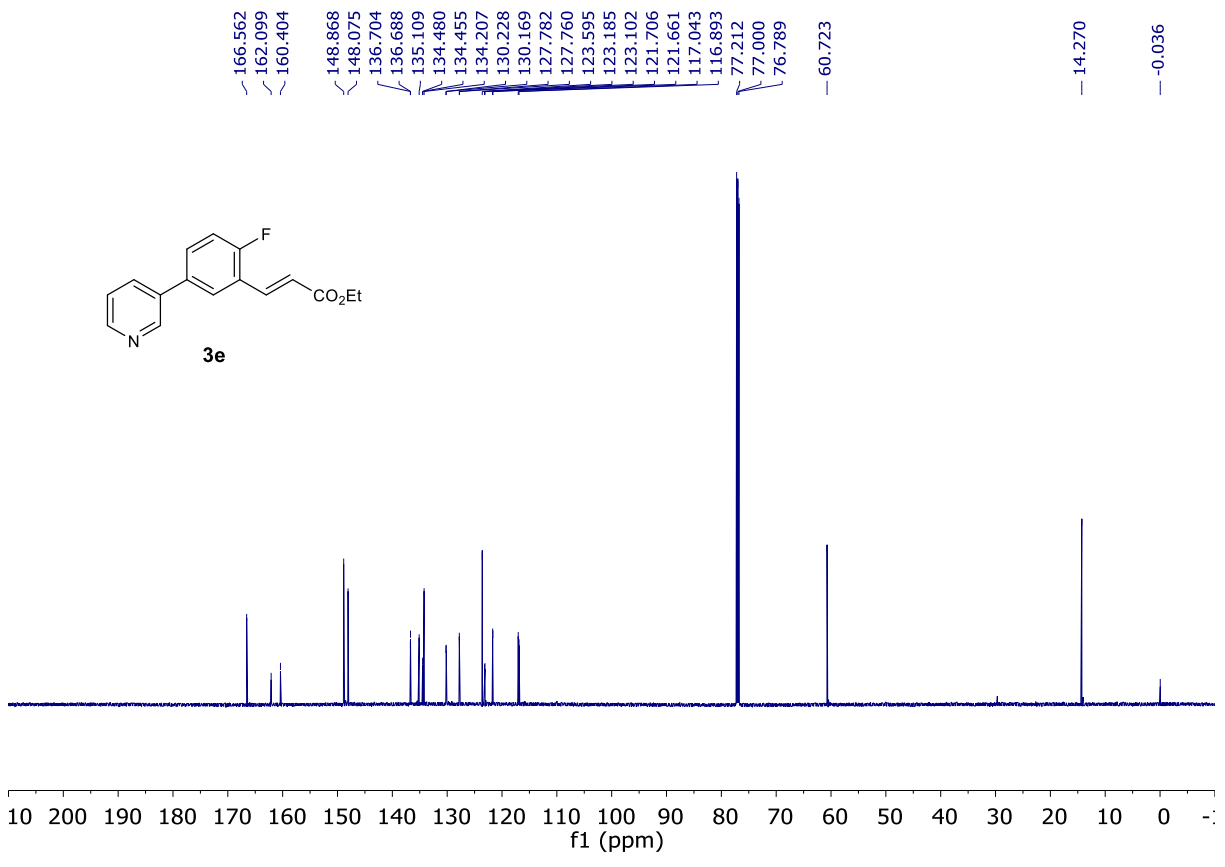

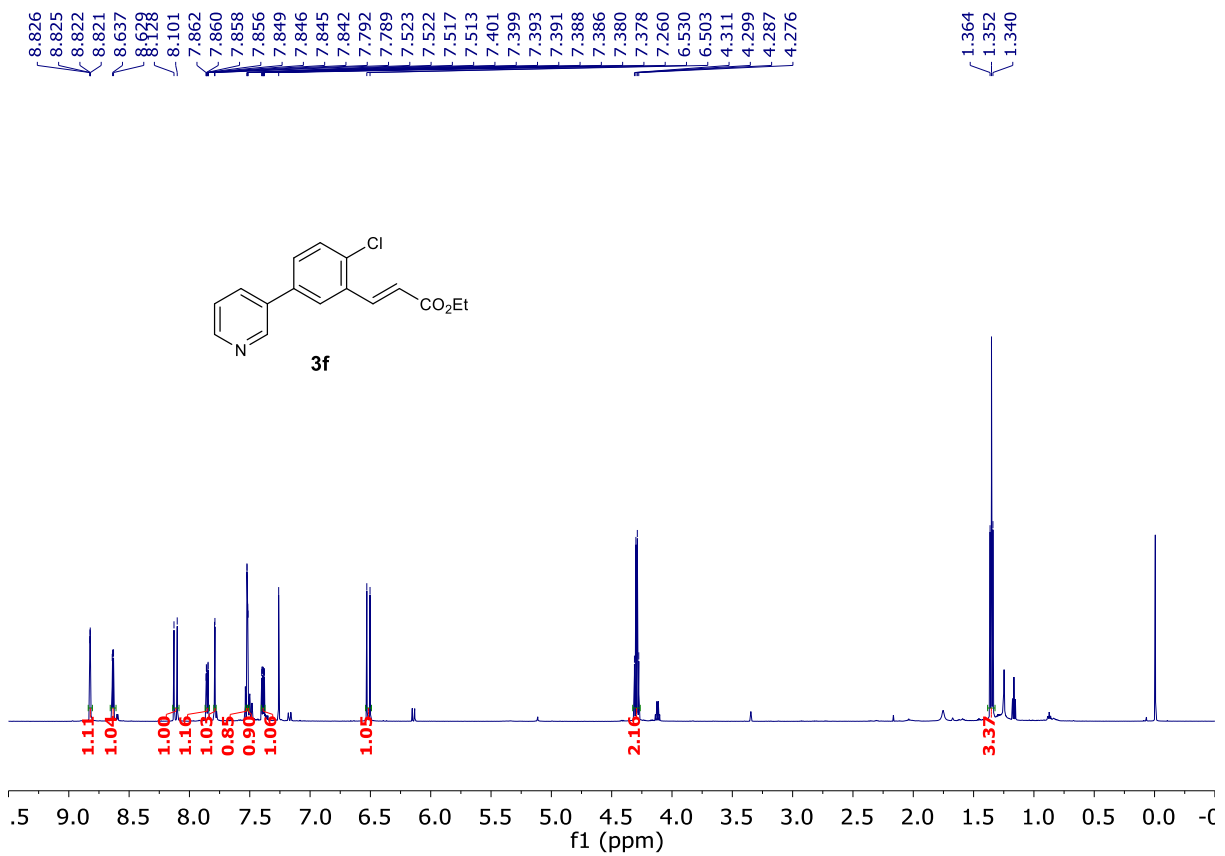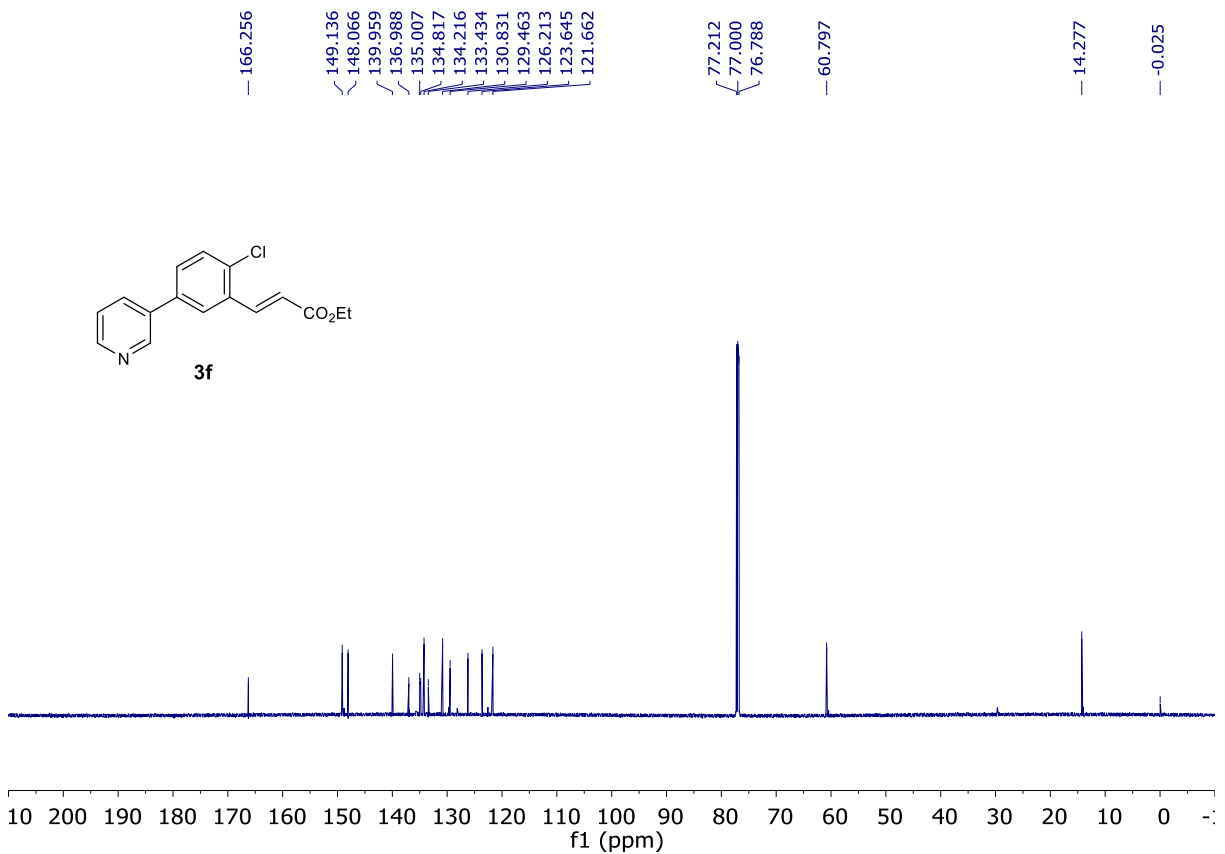

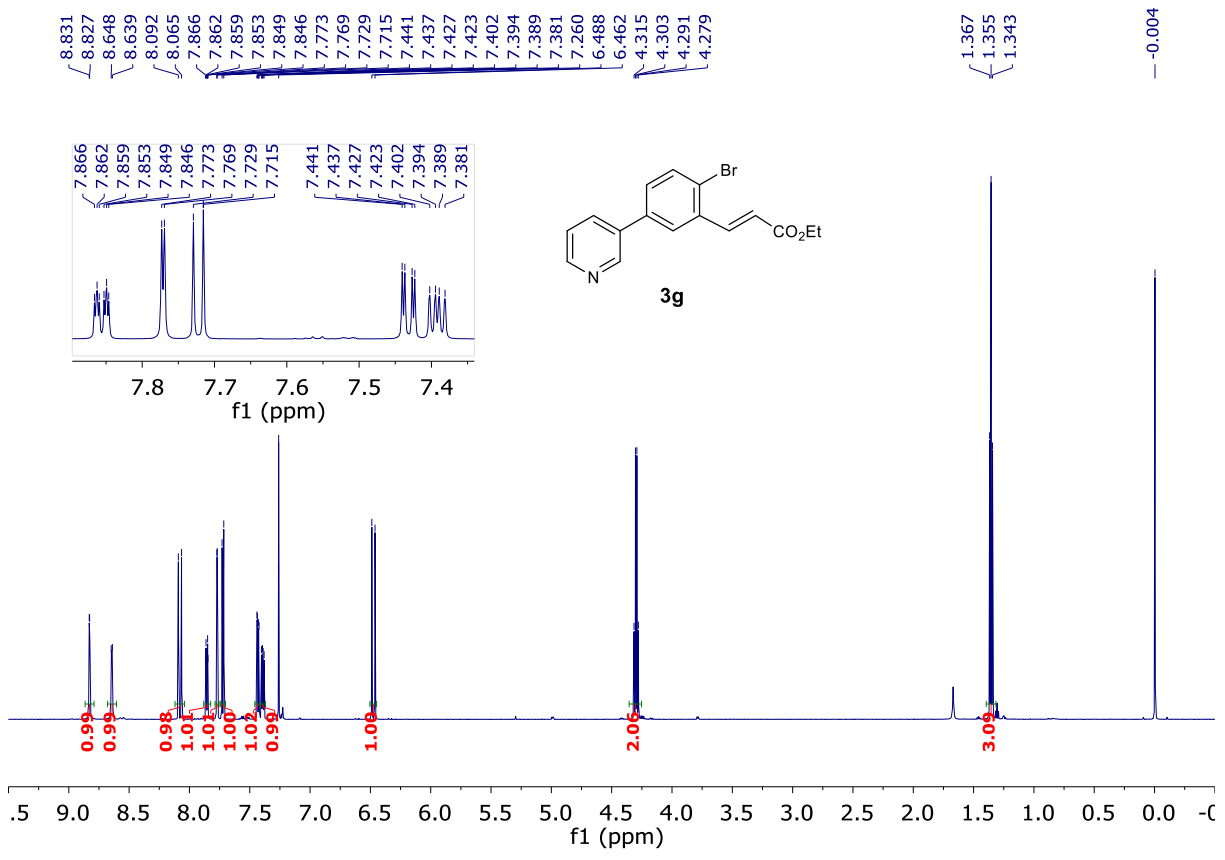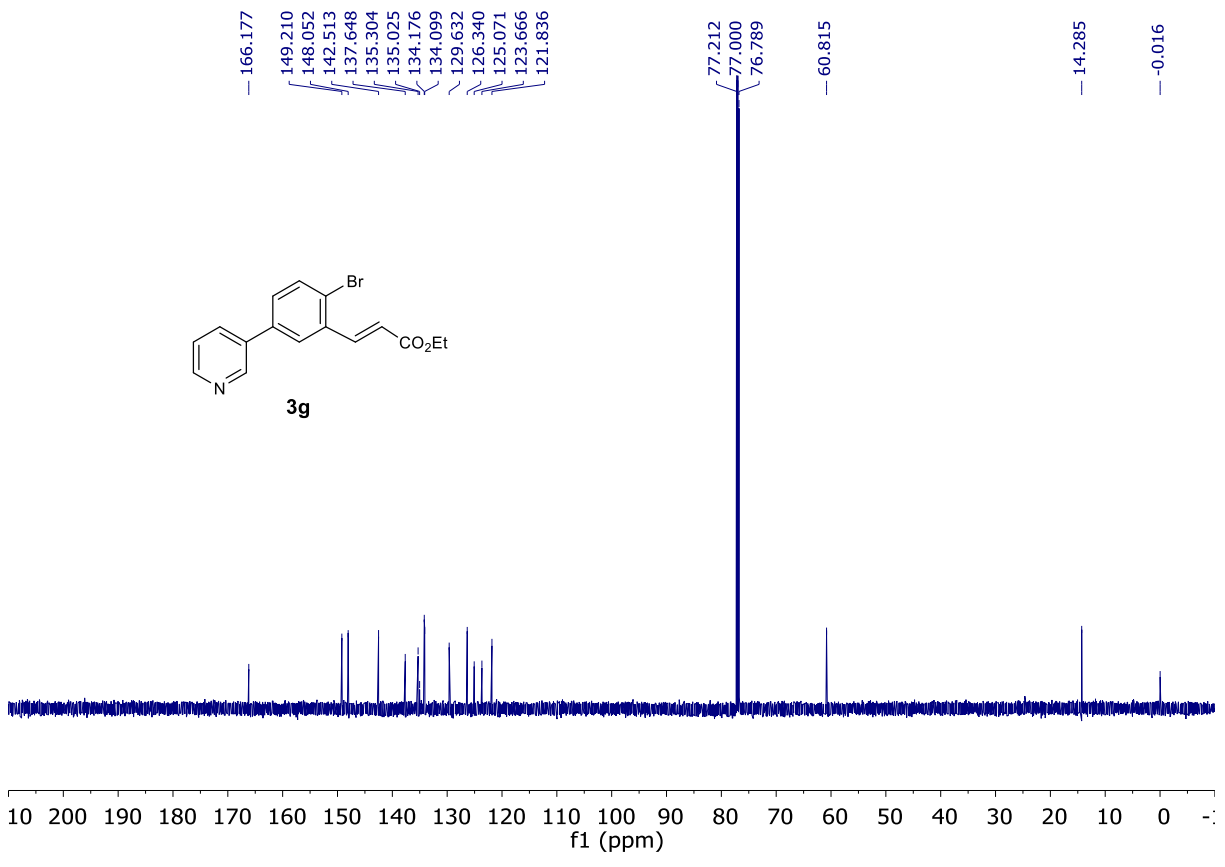

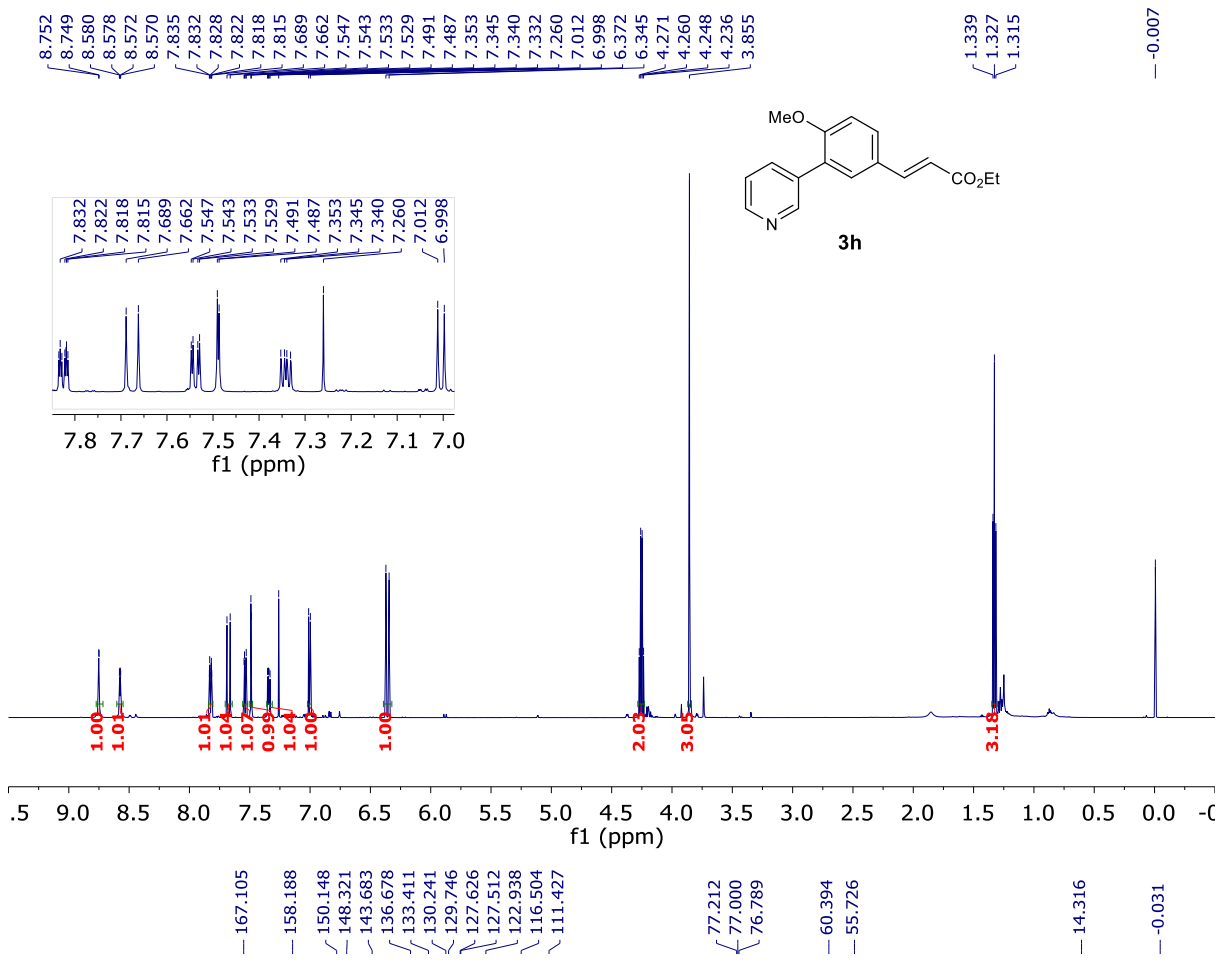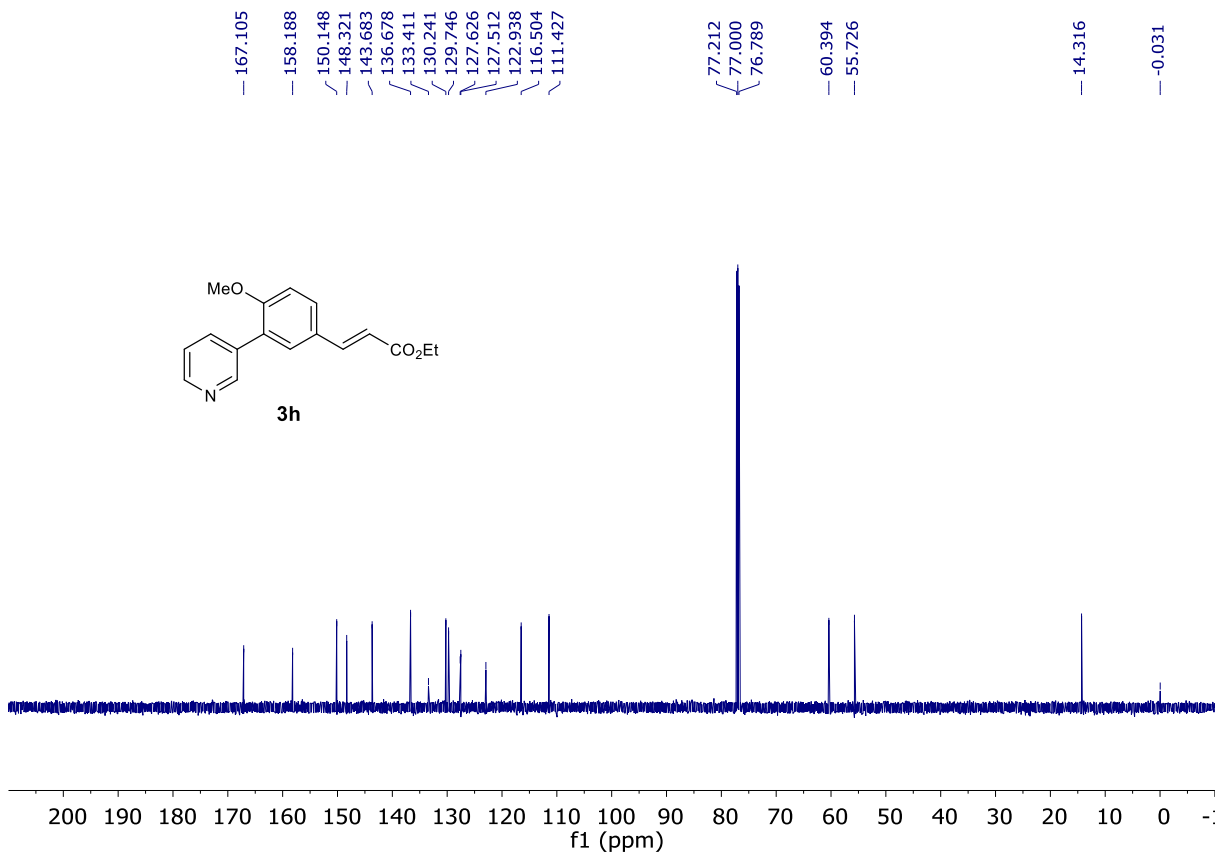

## 2D NOESY of compound **3h**

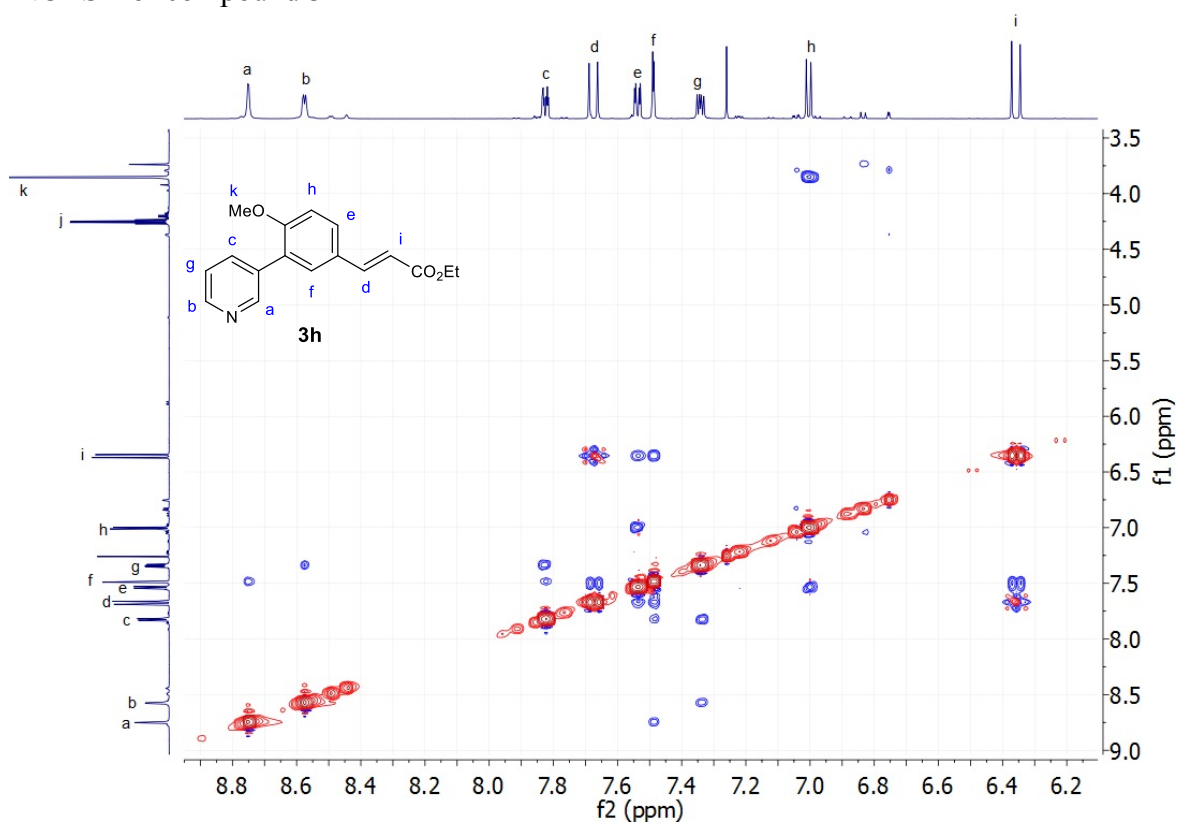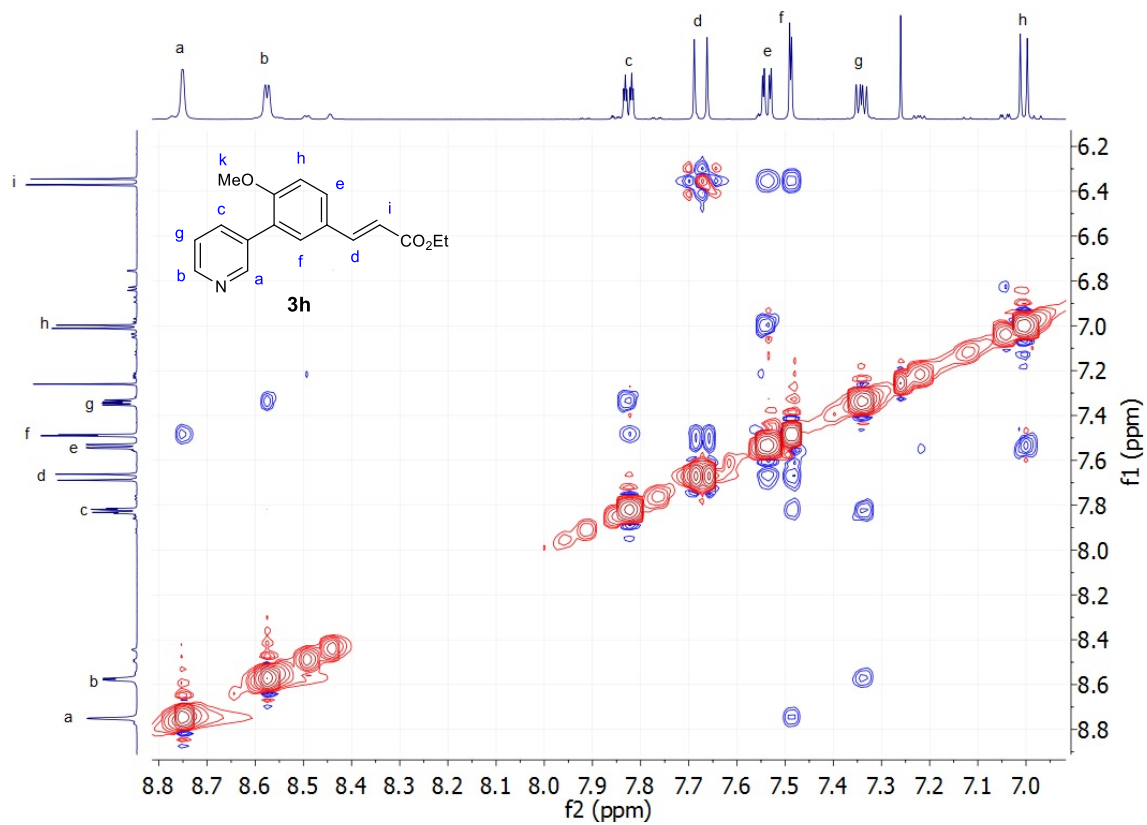

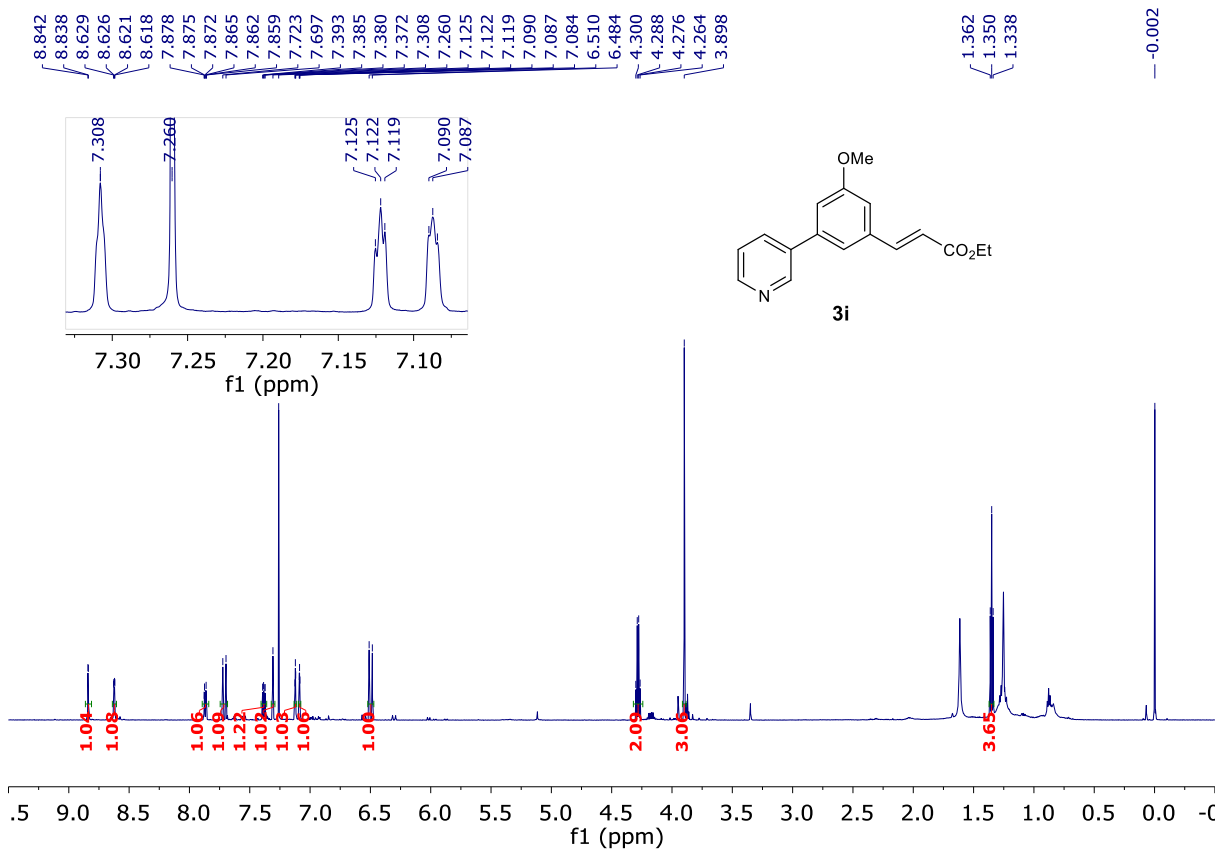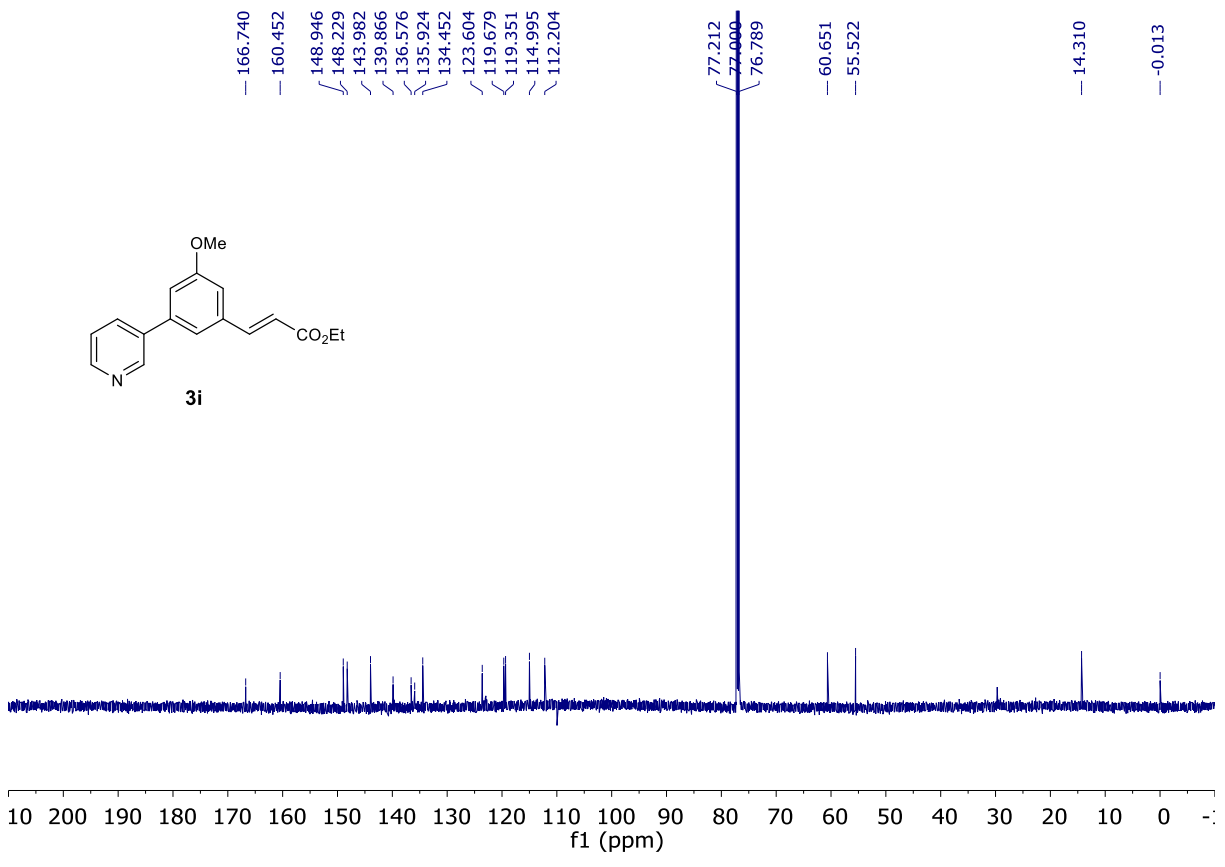



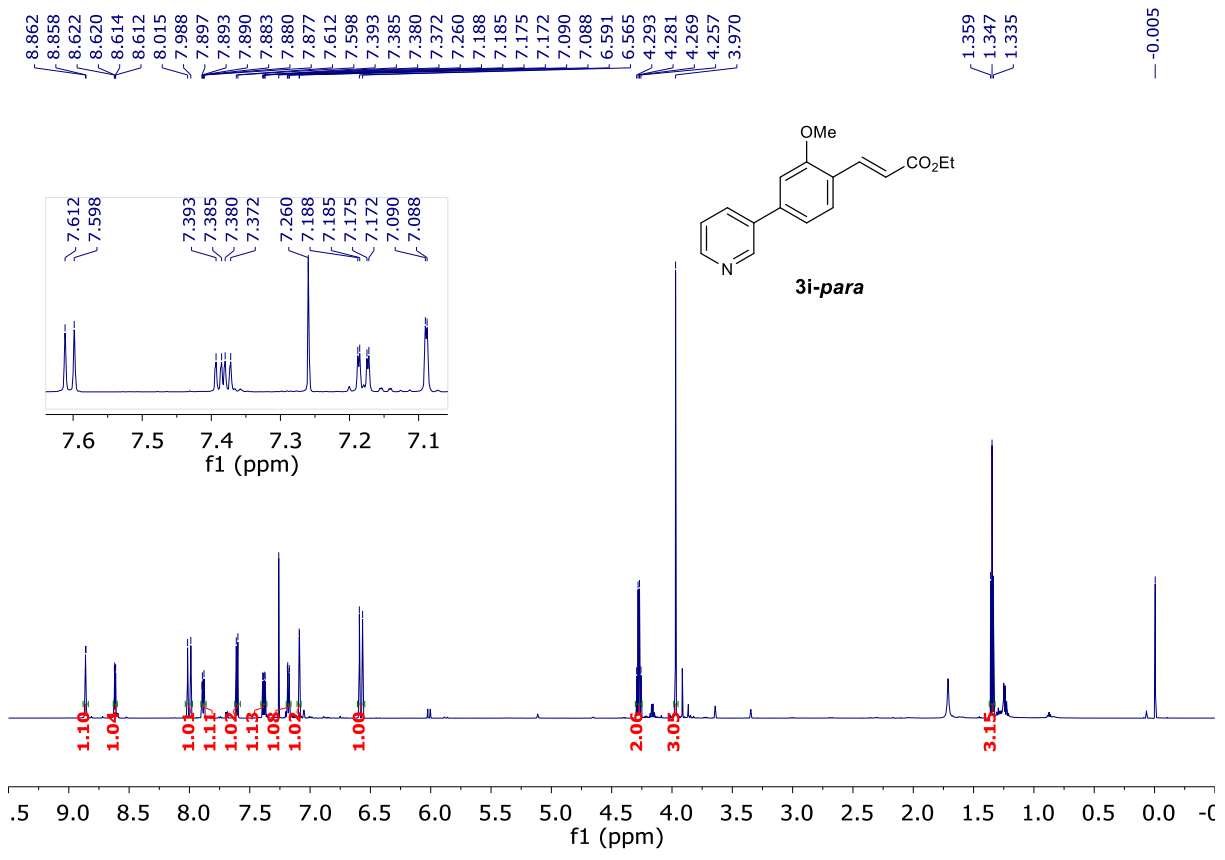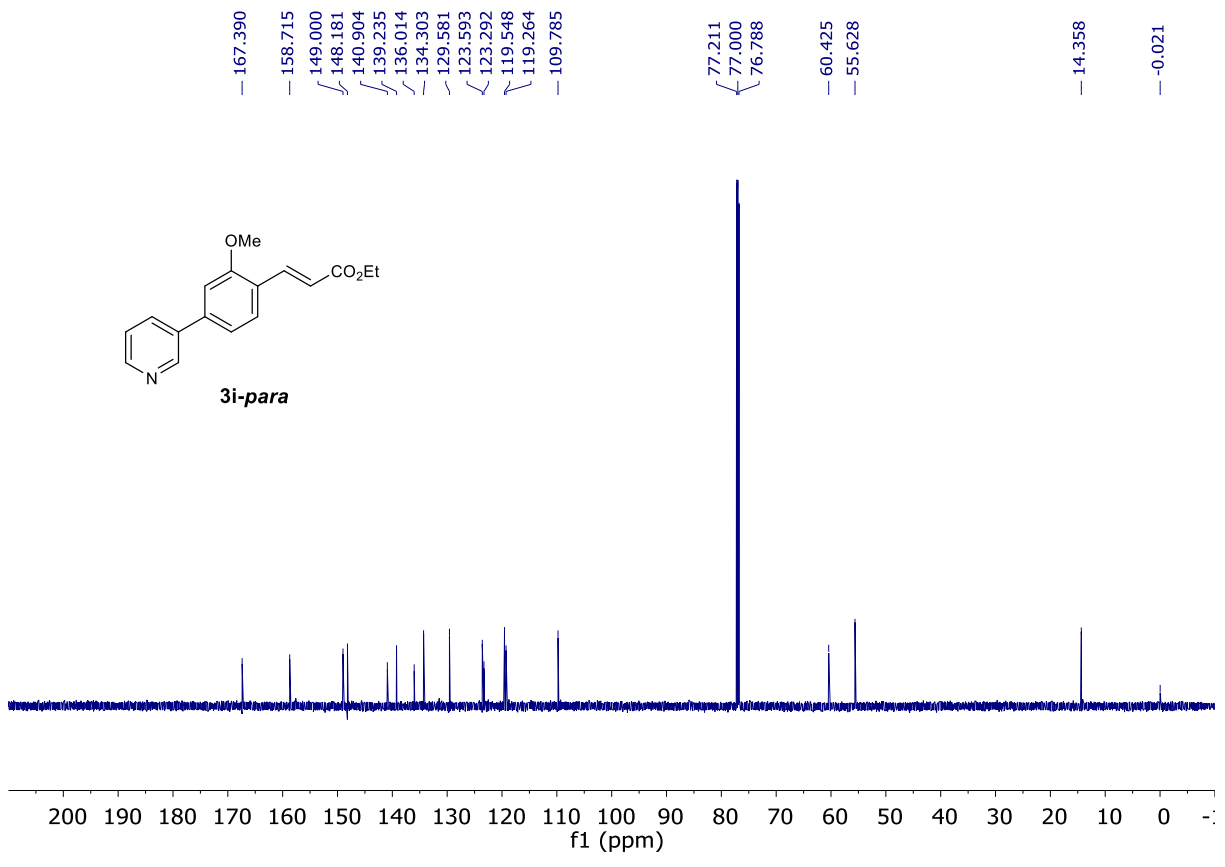

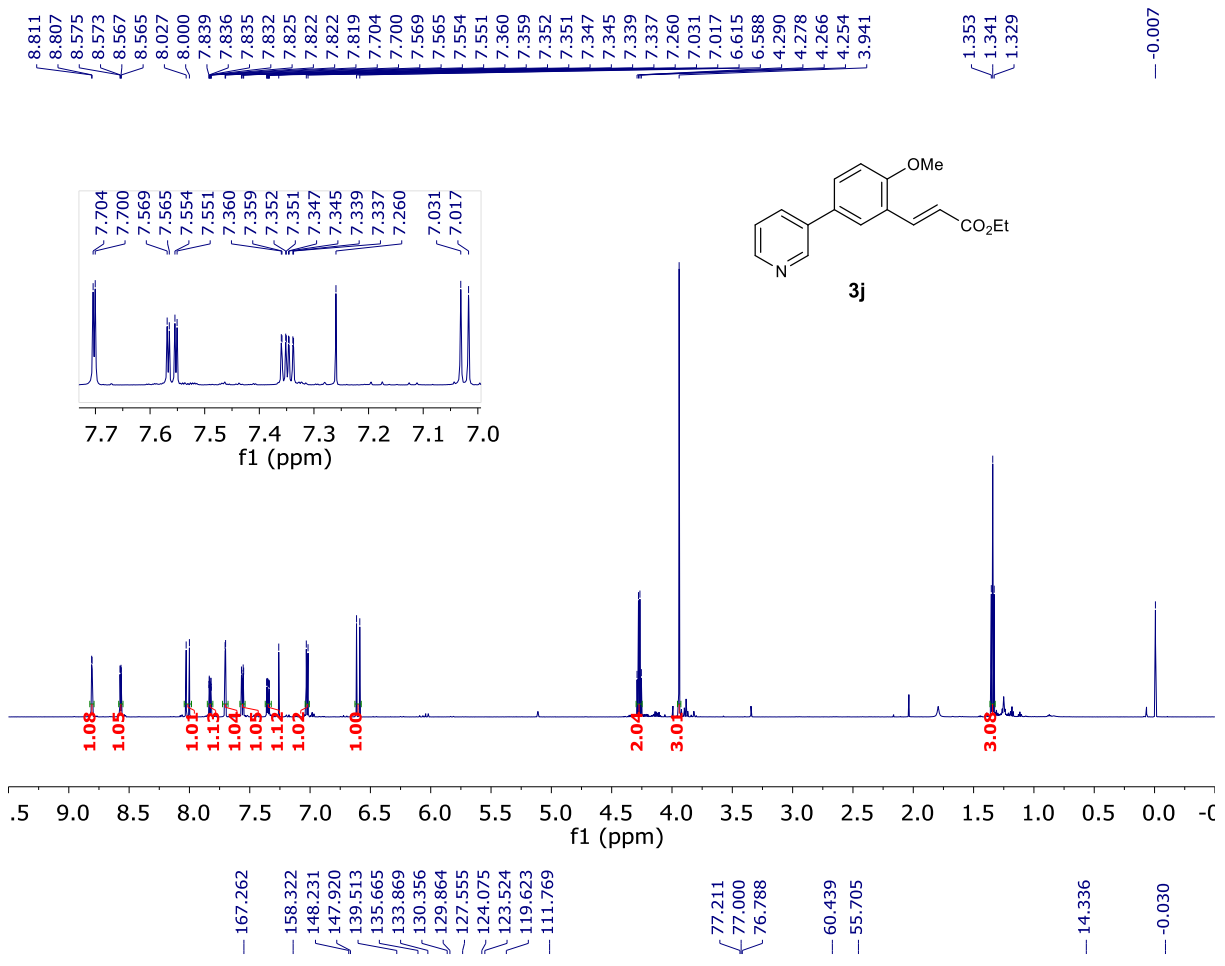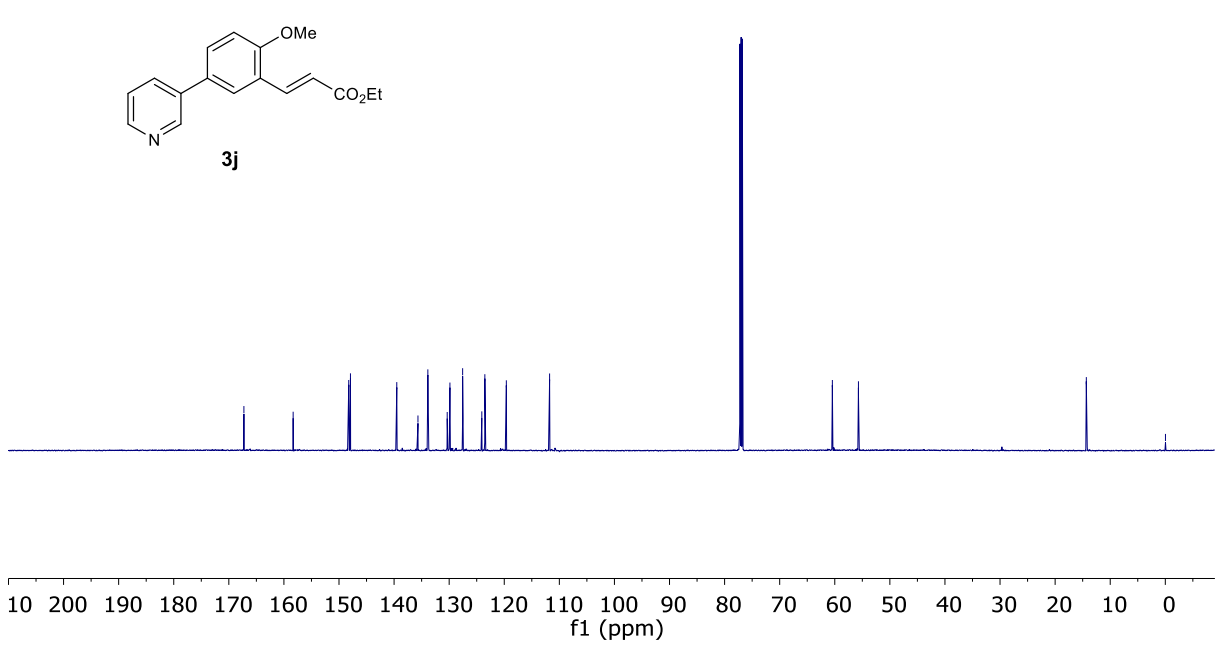

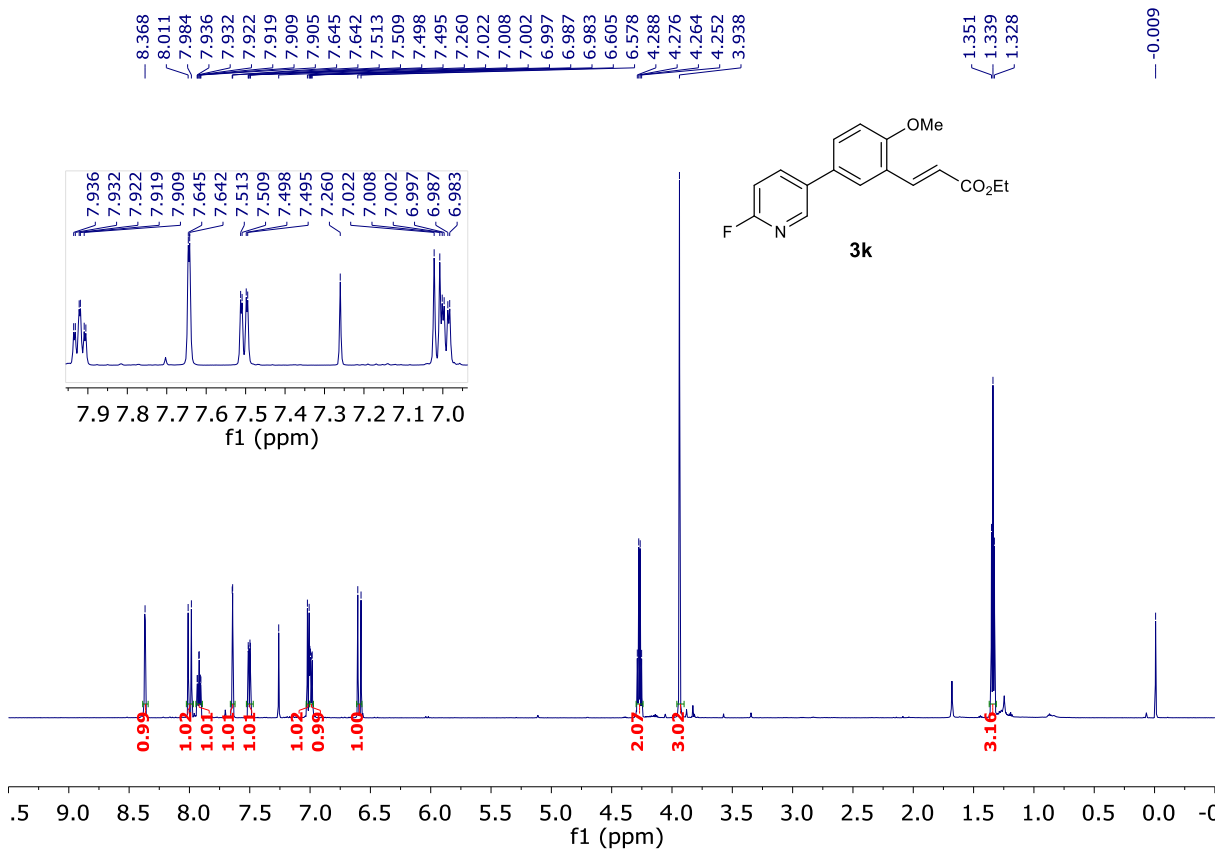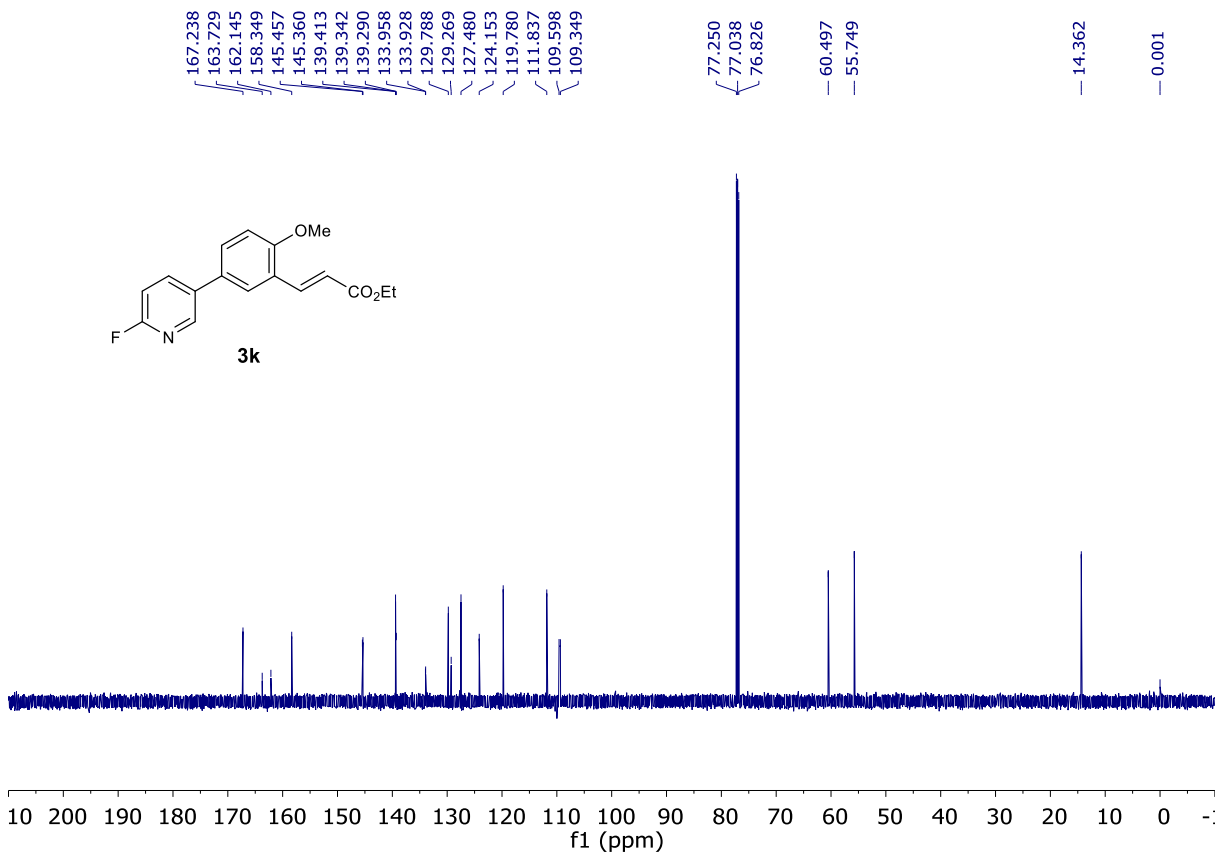

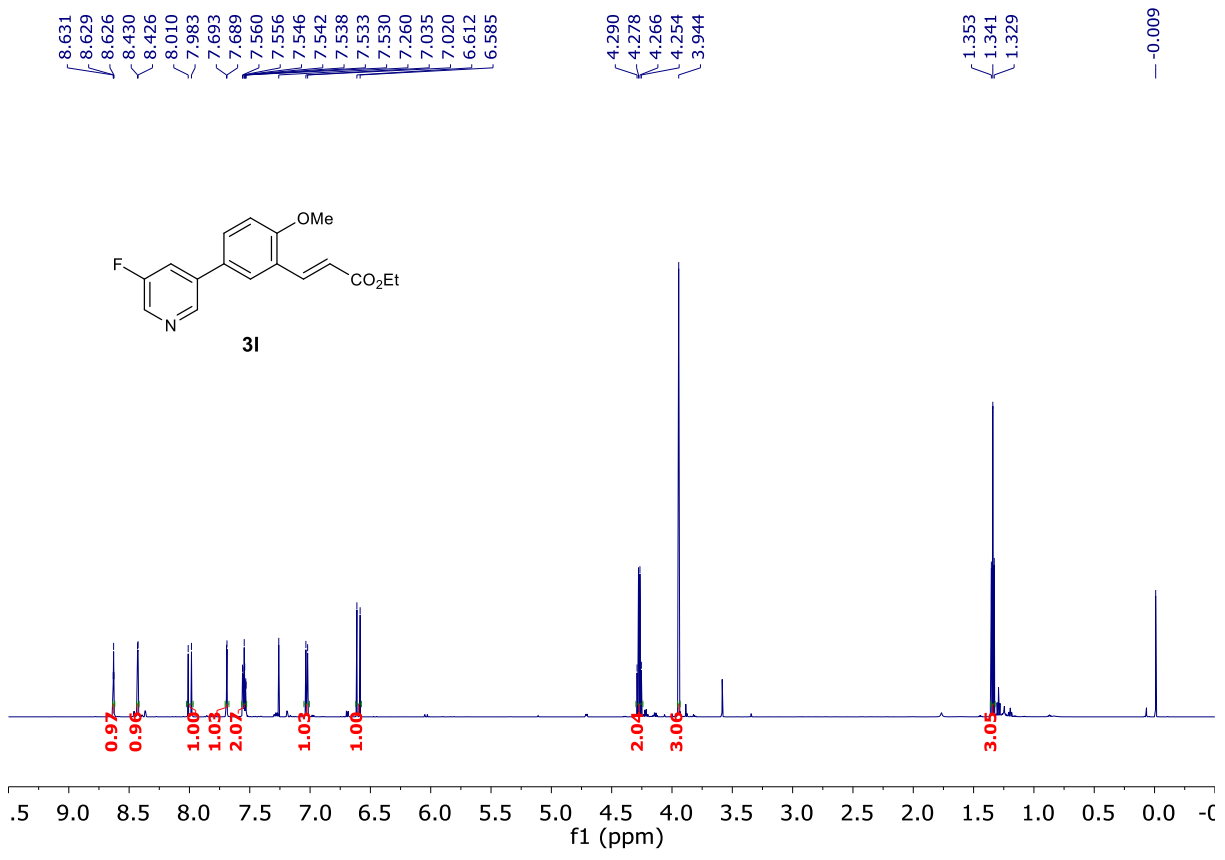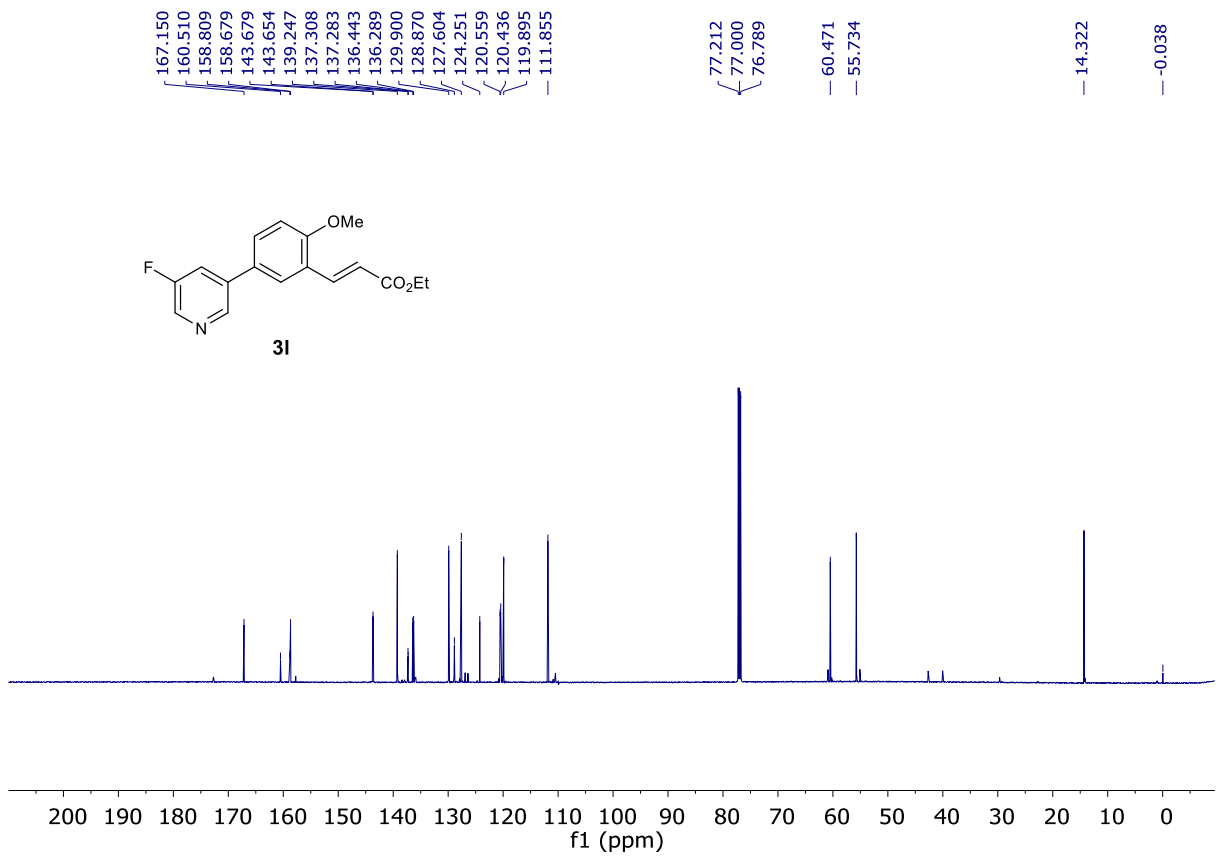

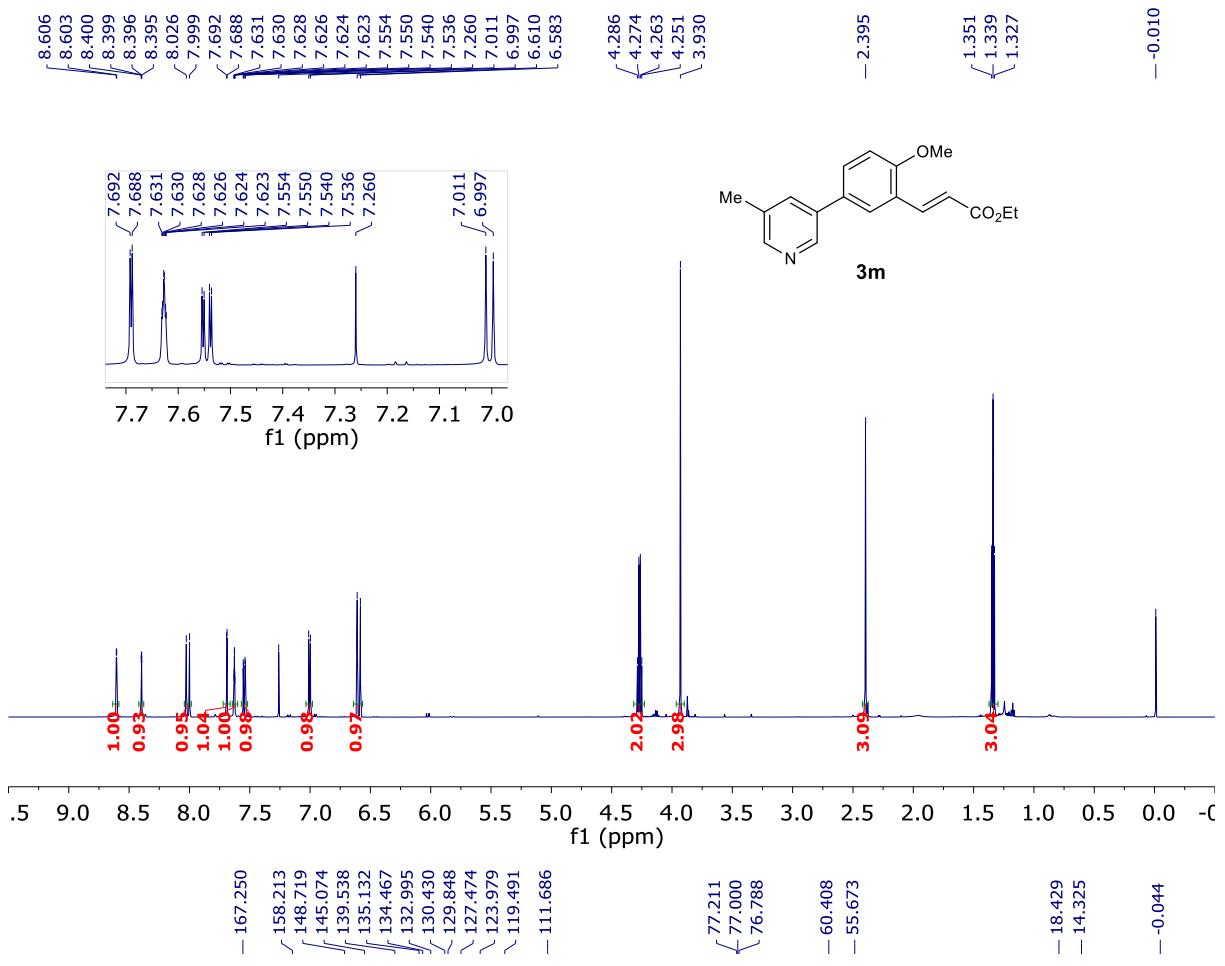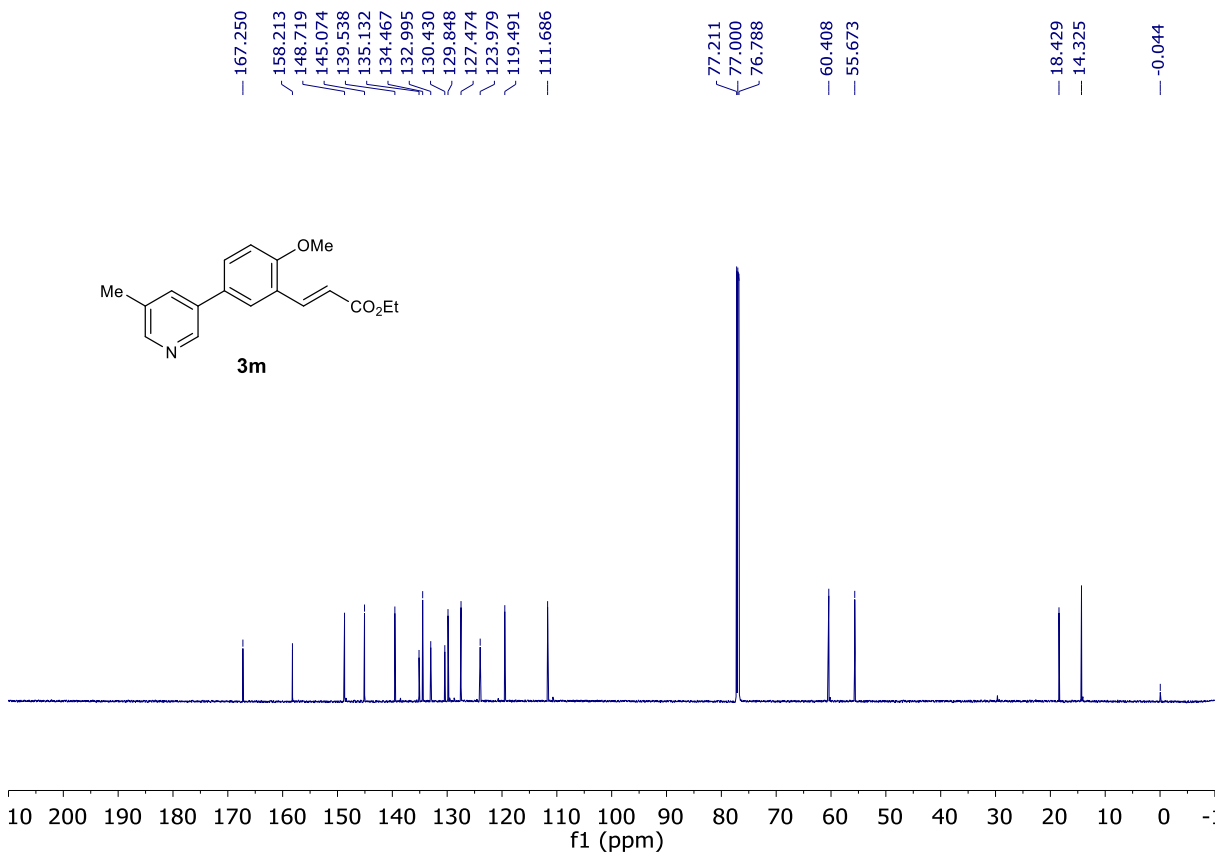

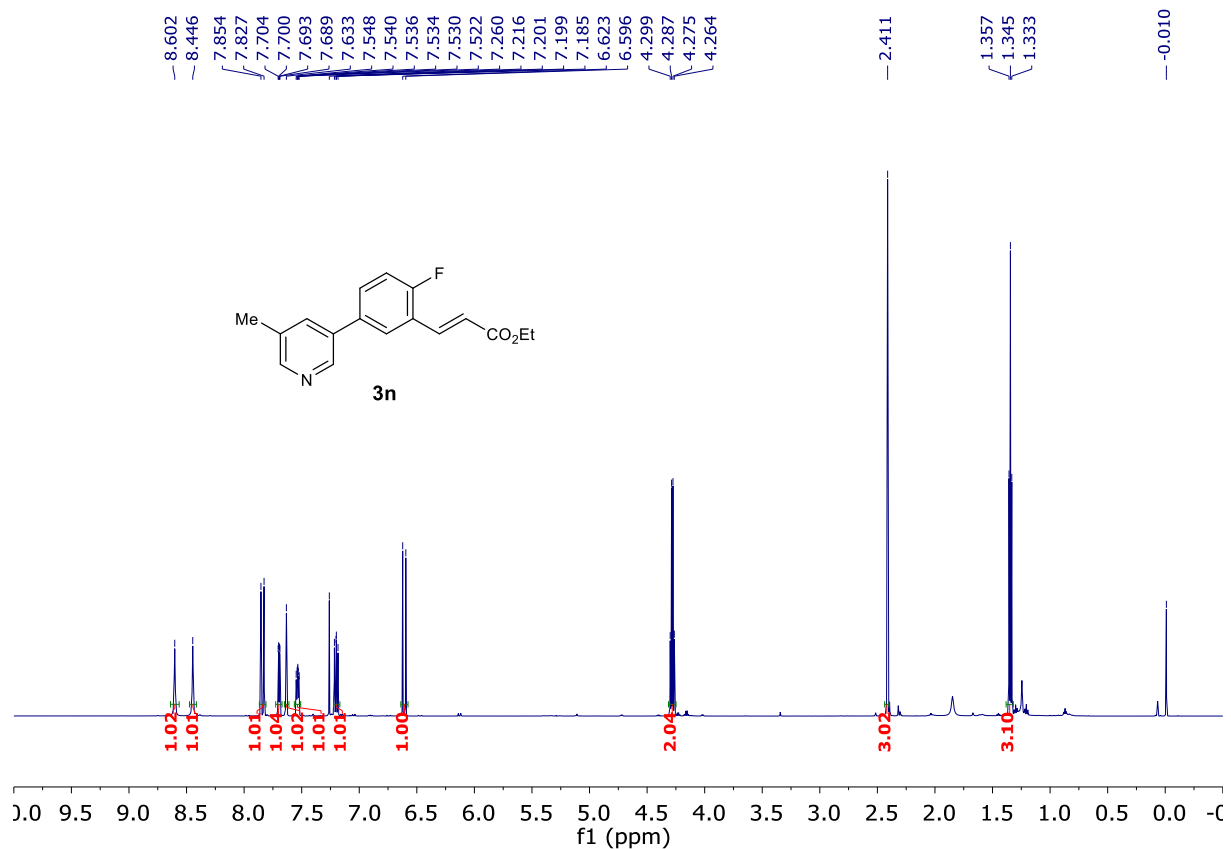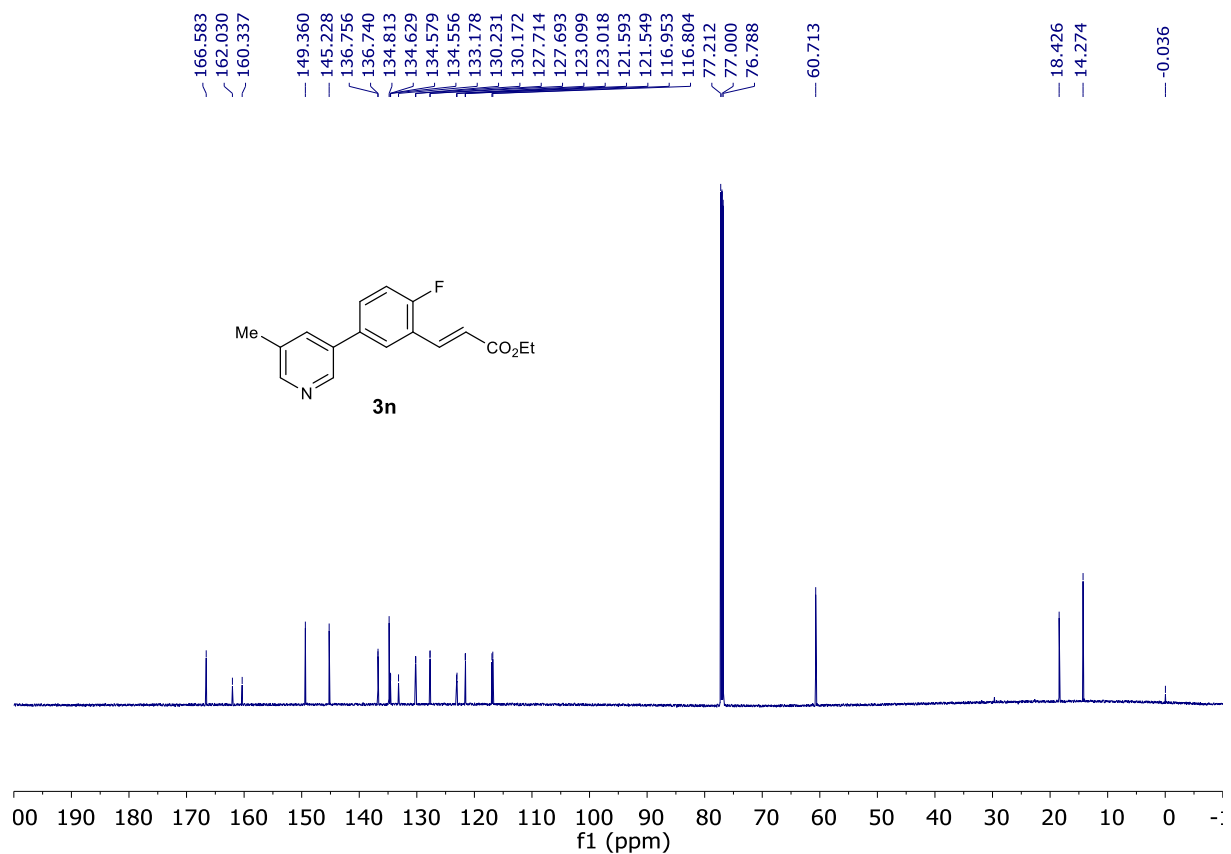

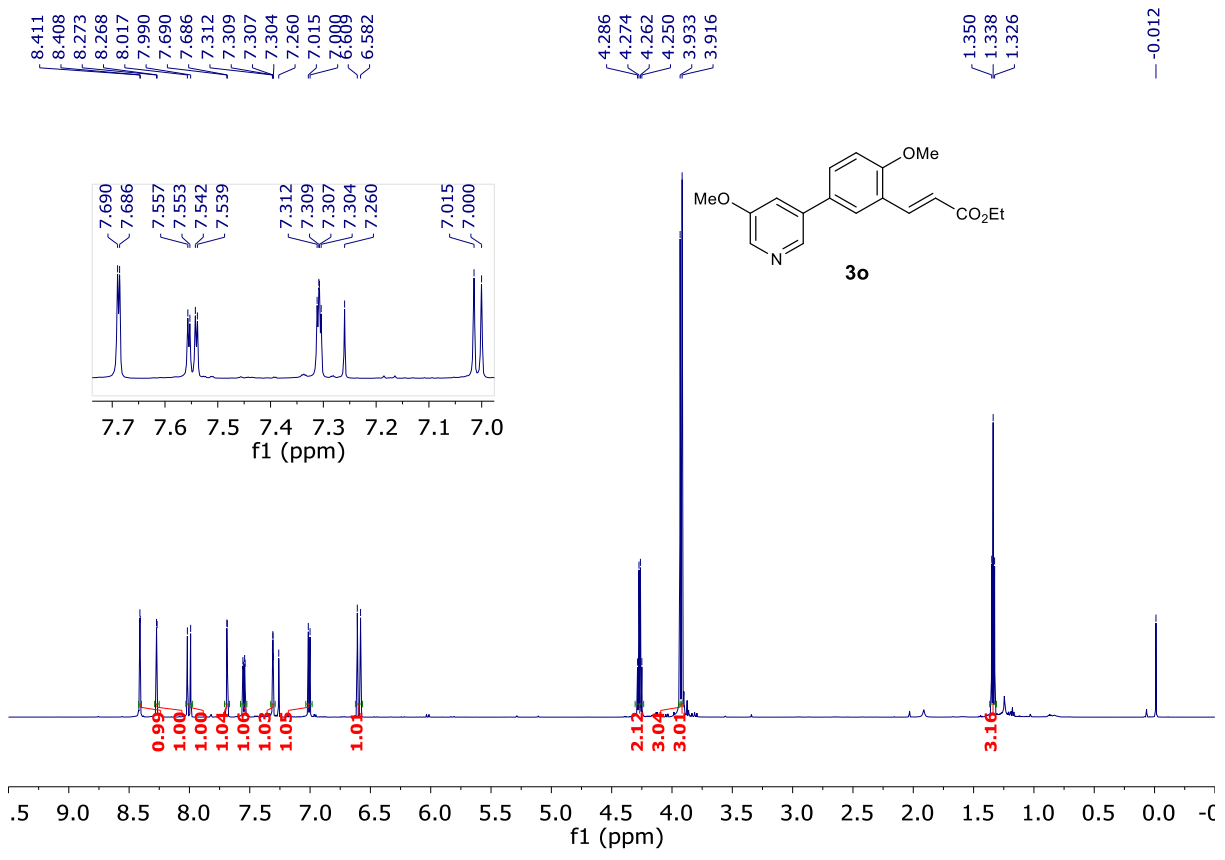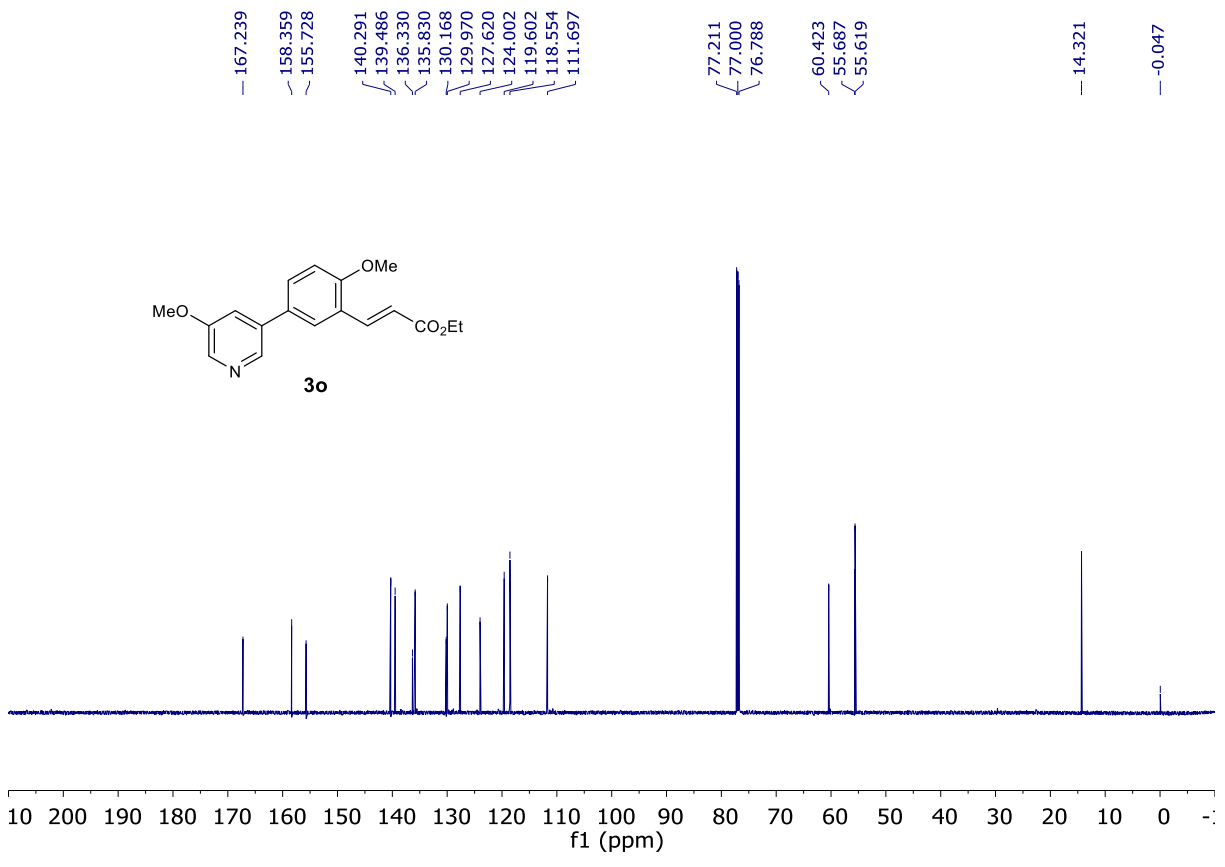

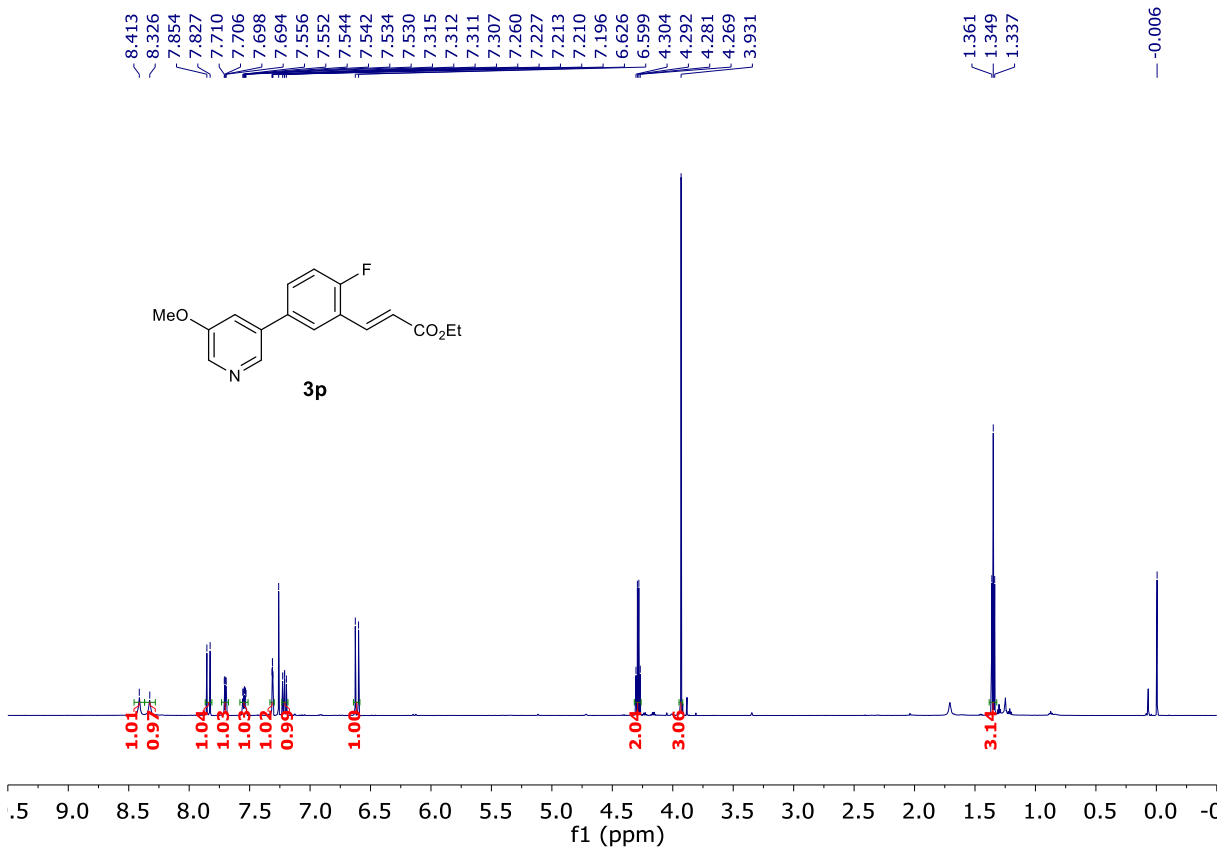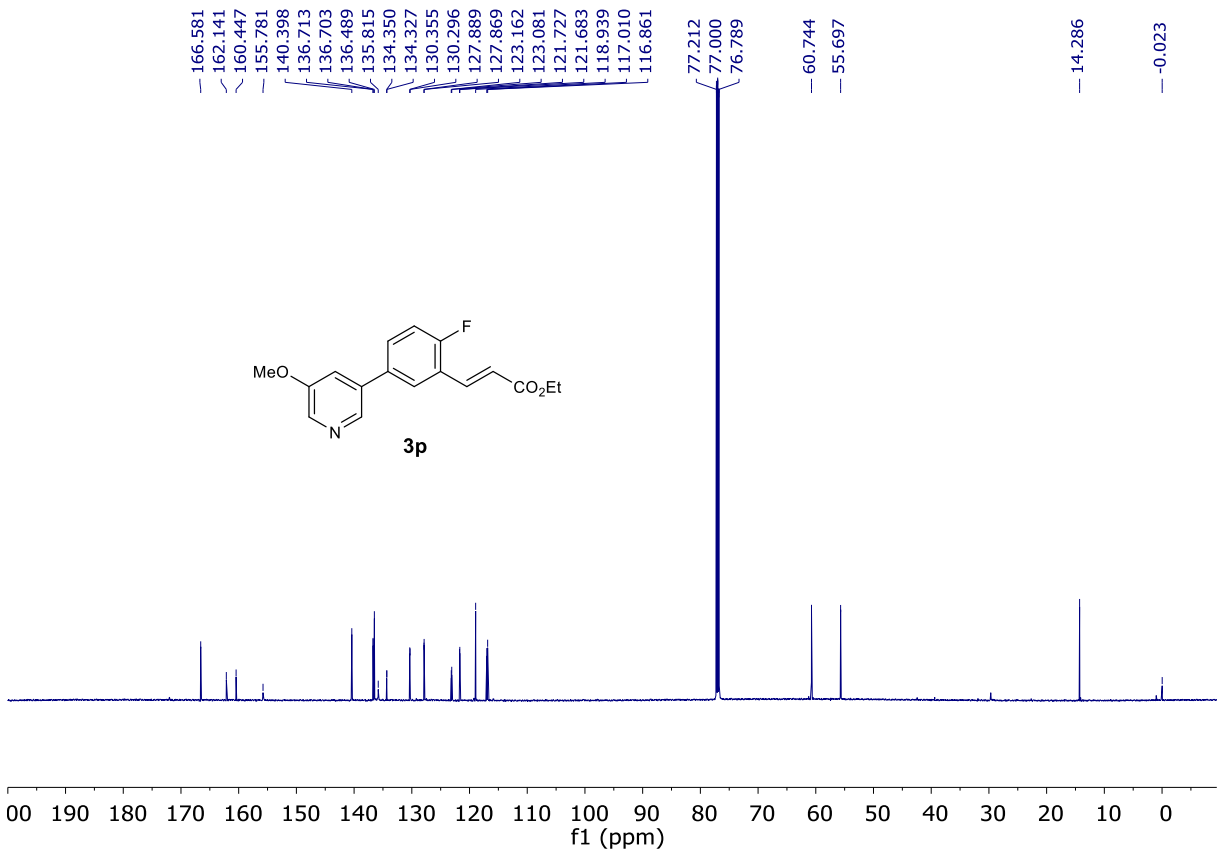



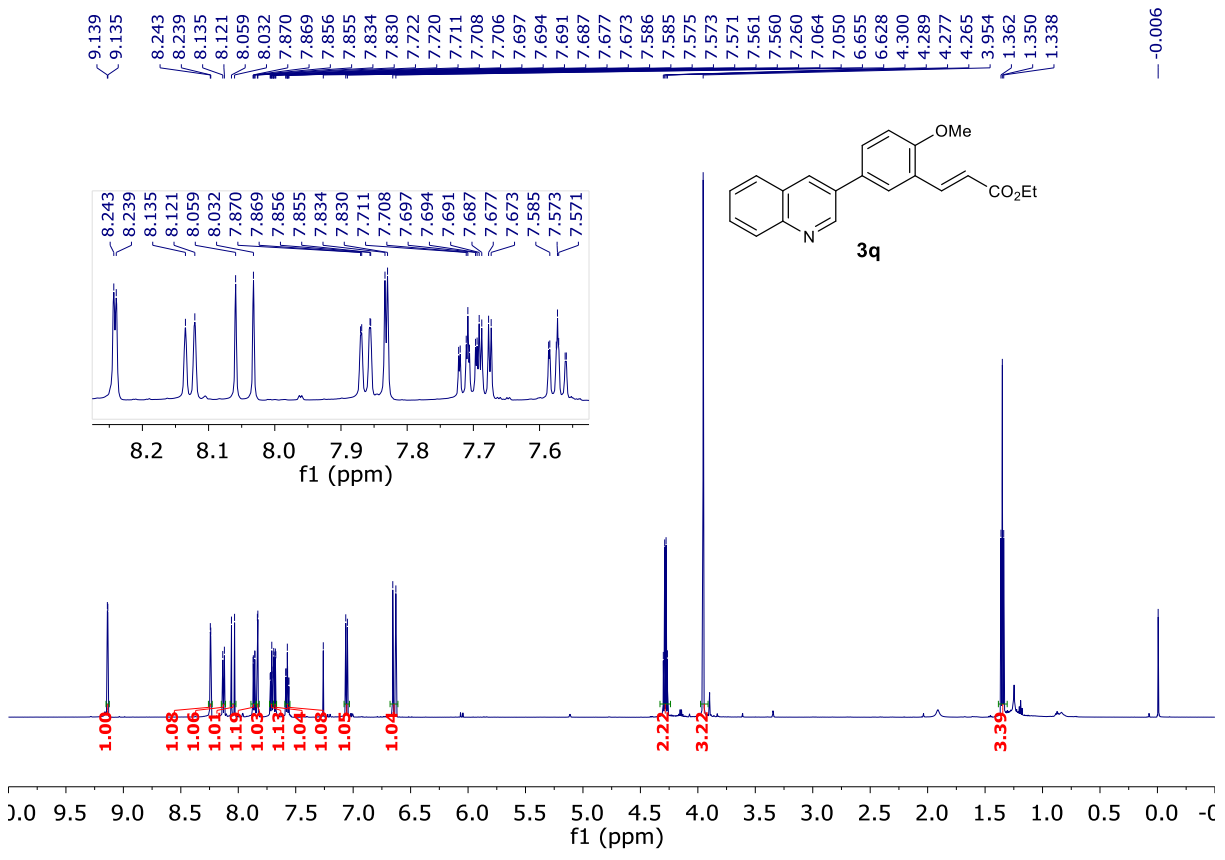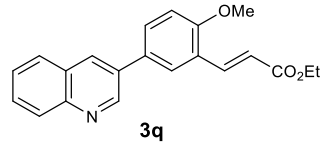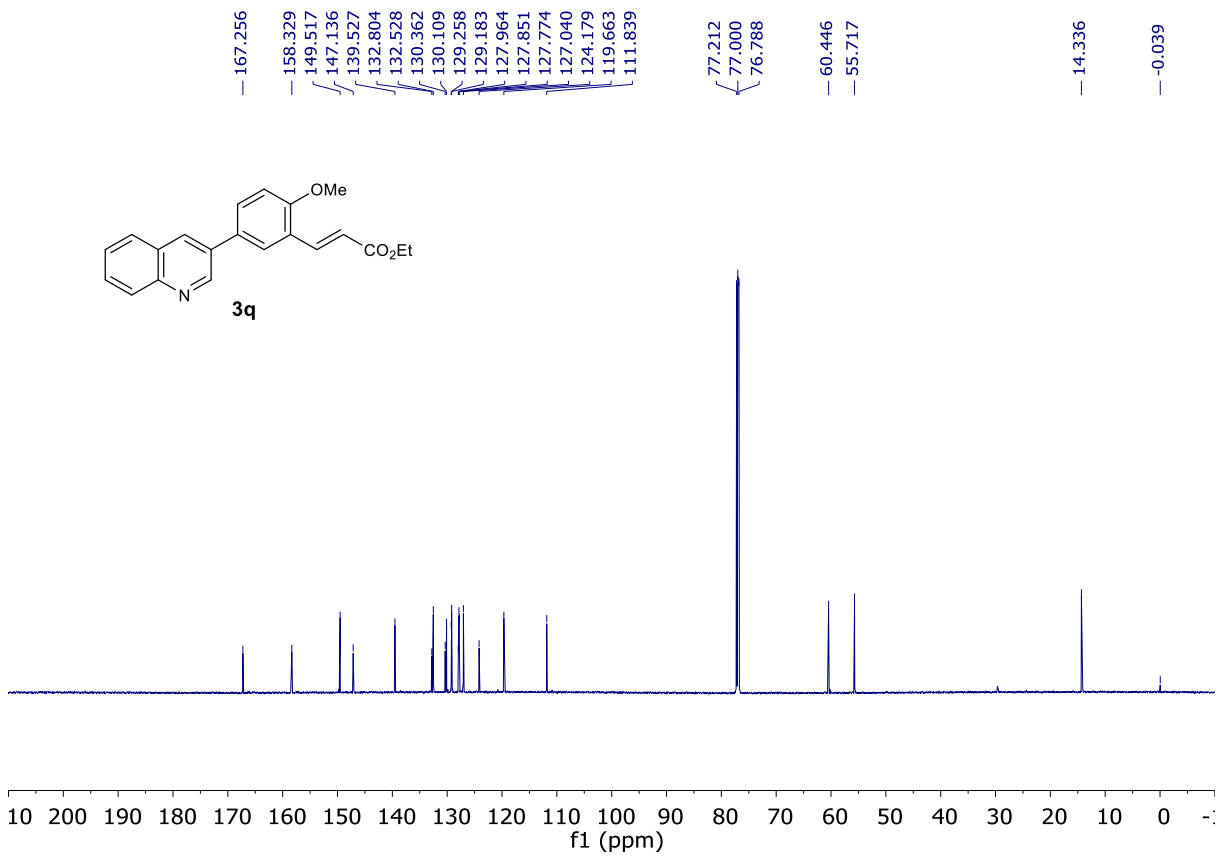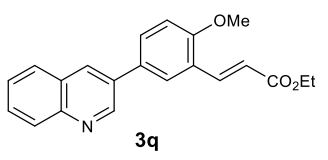



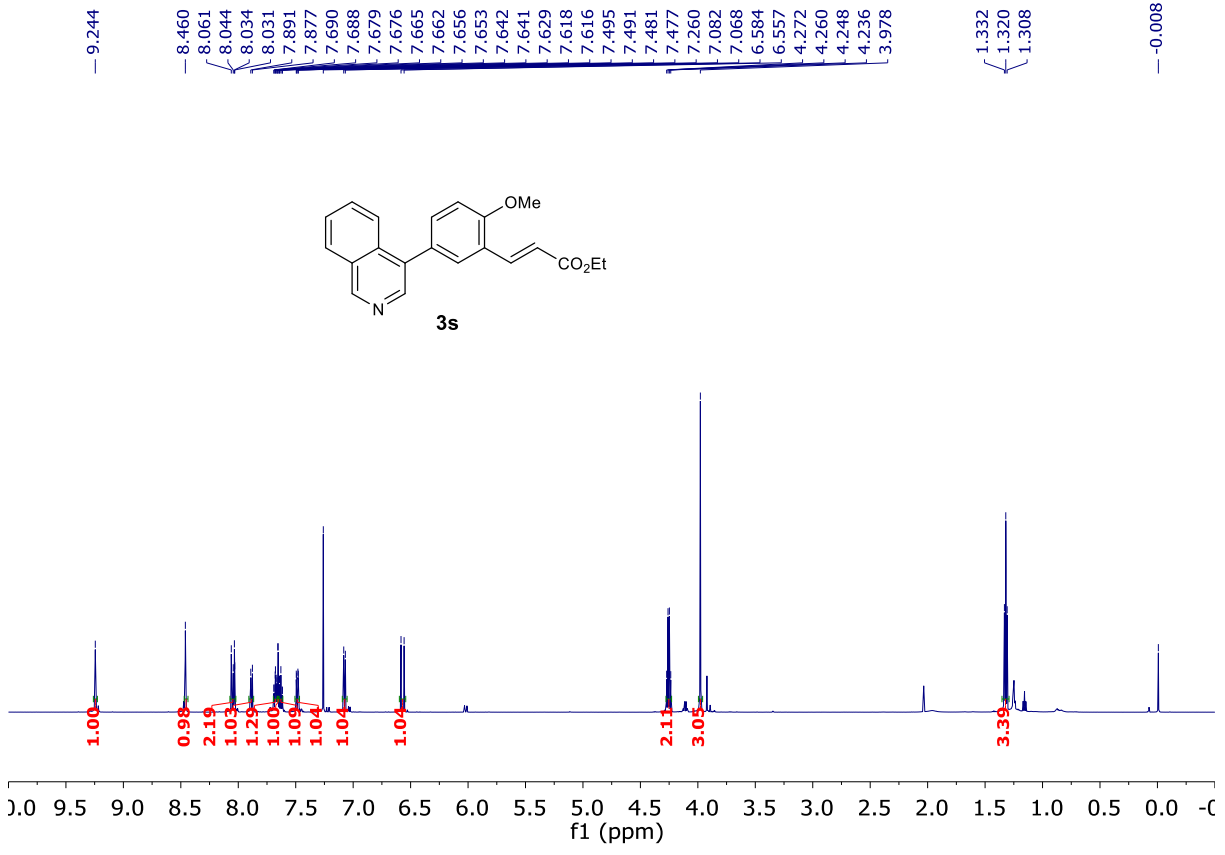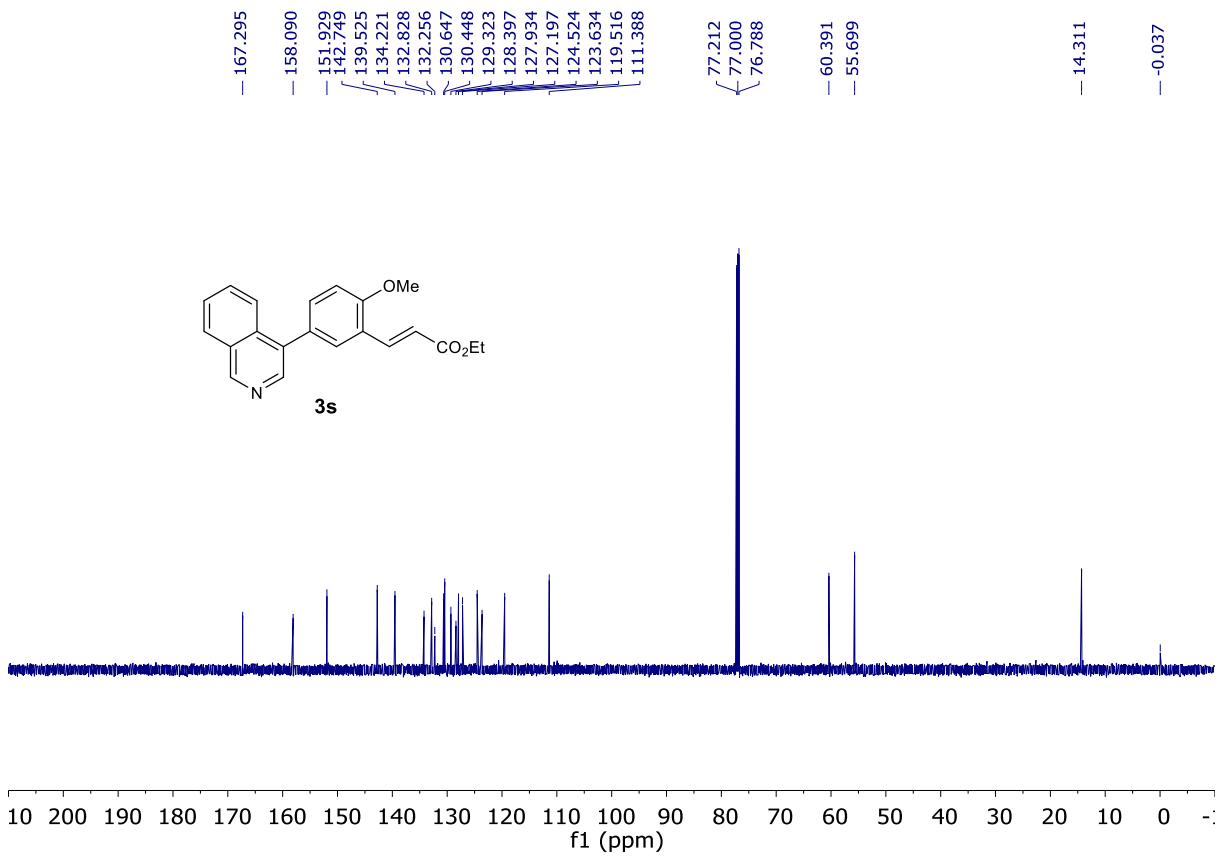

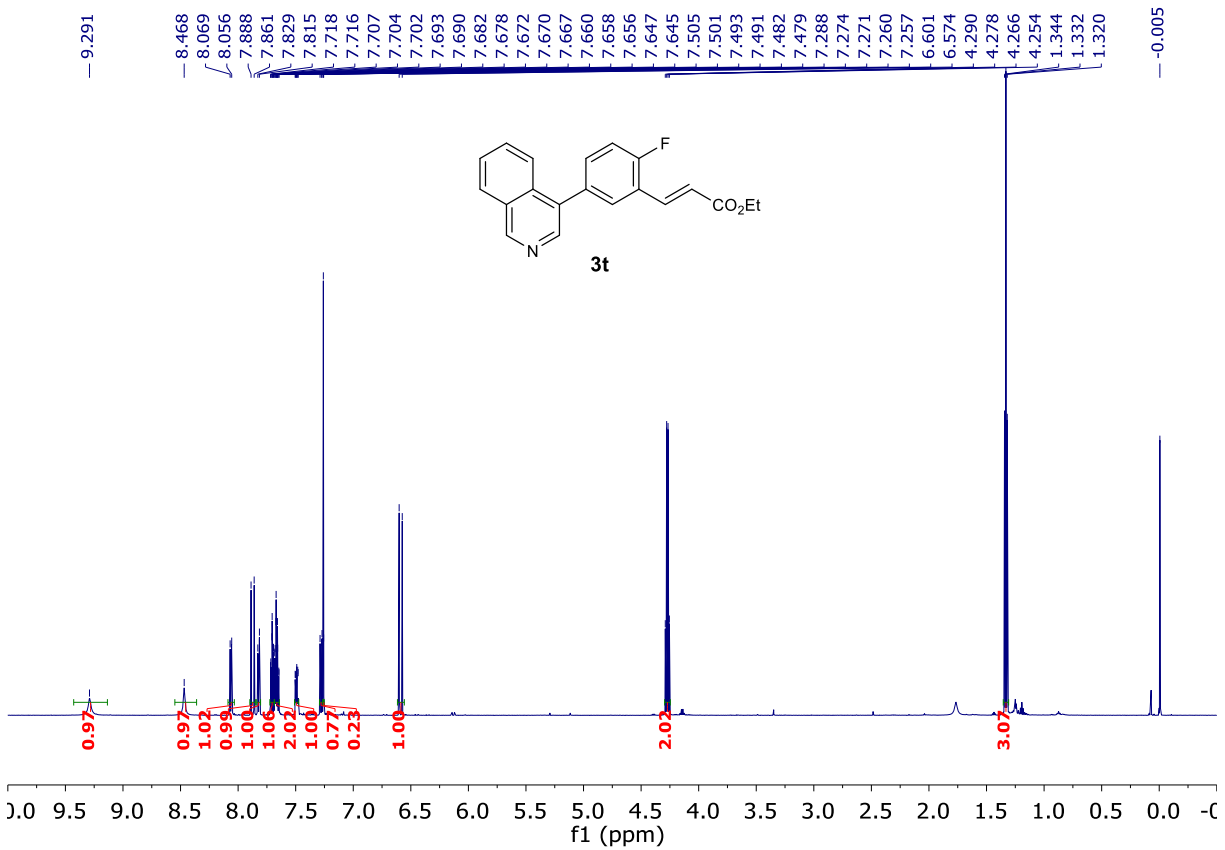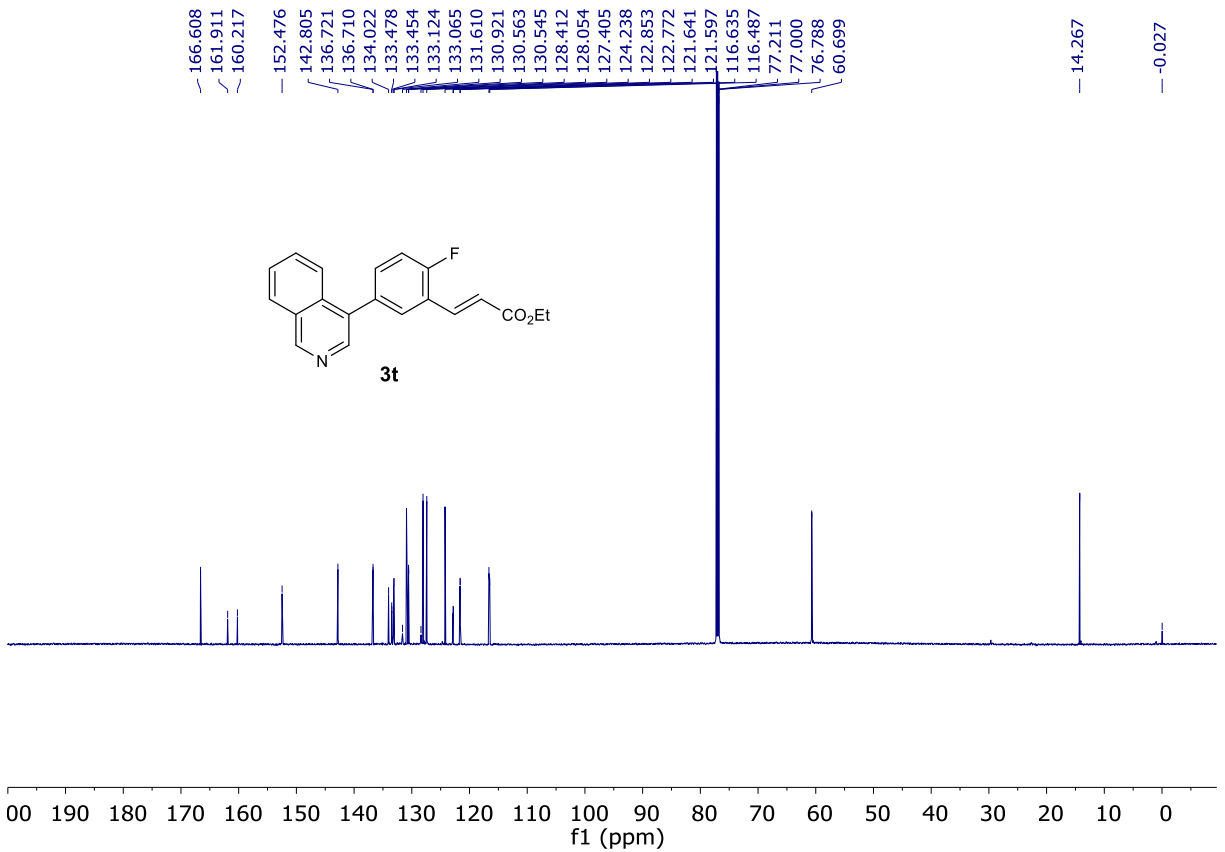

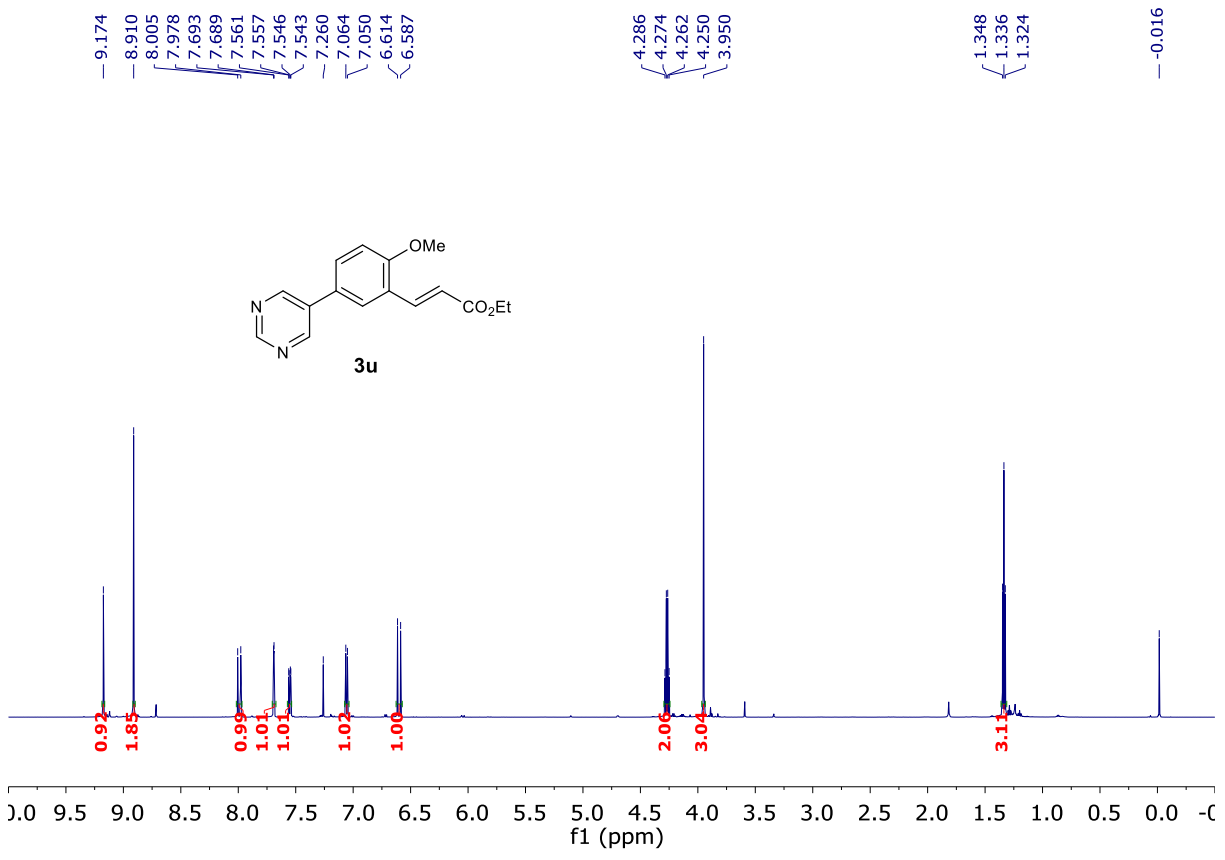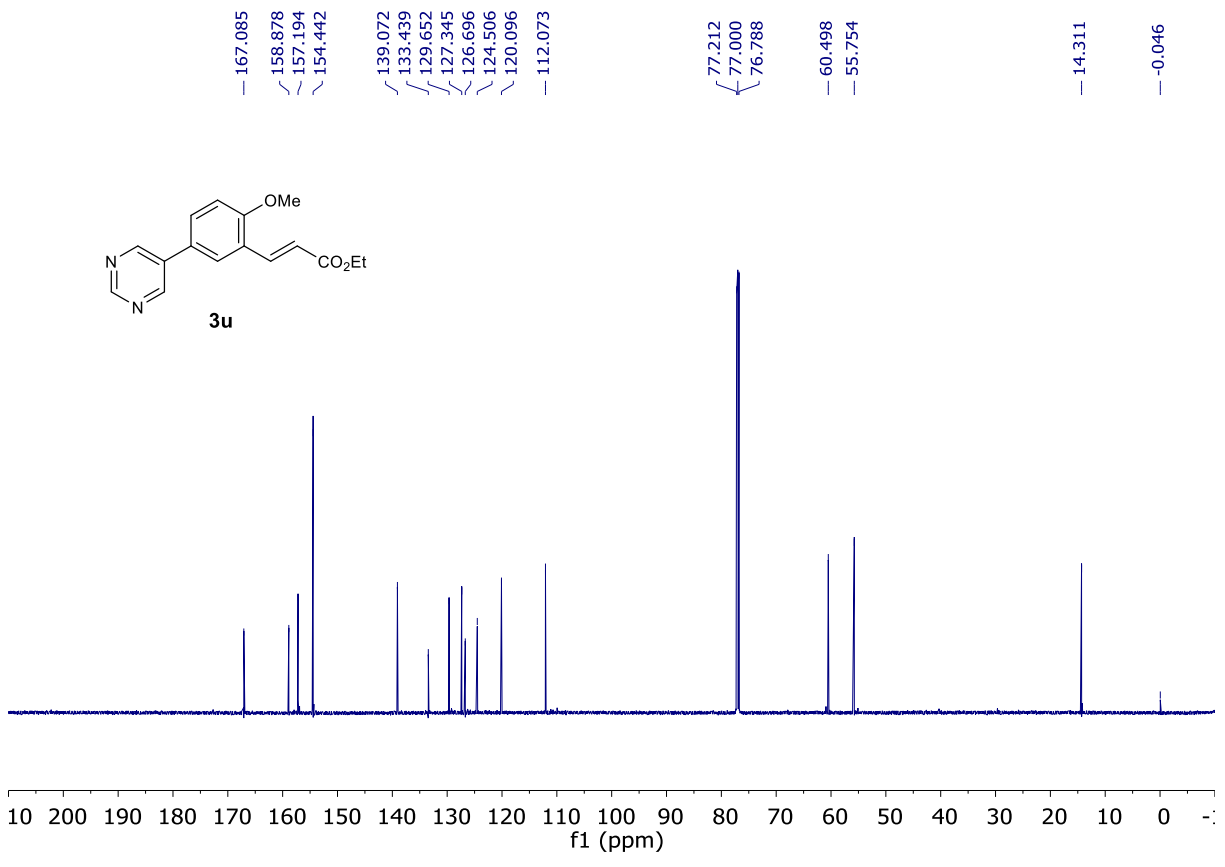

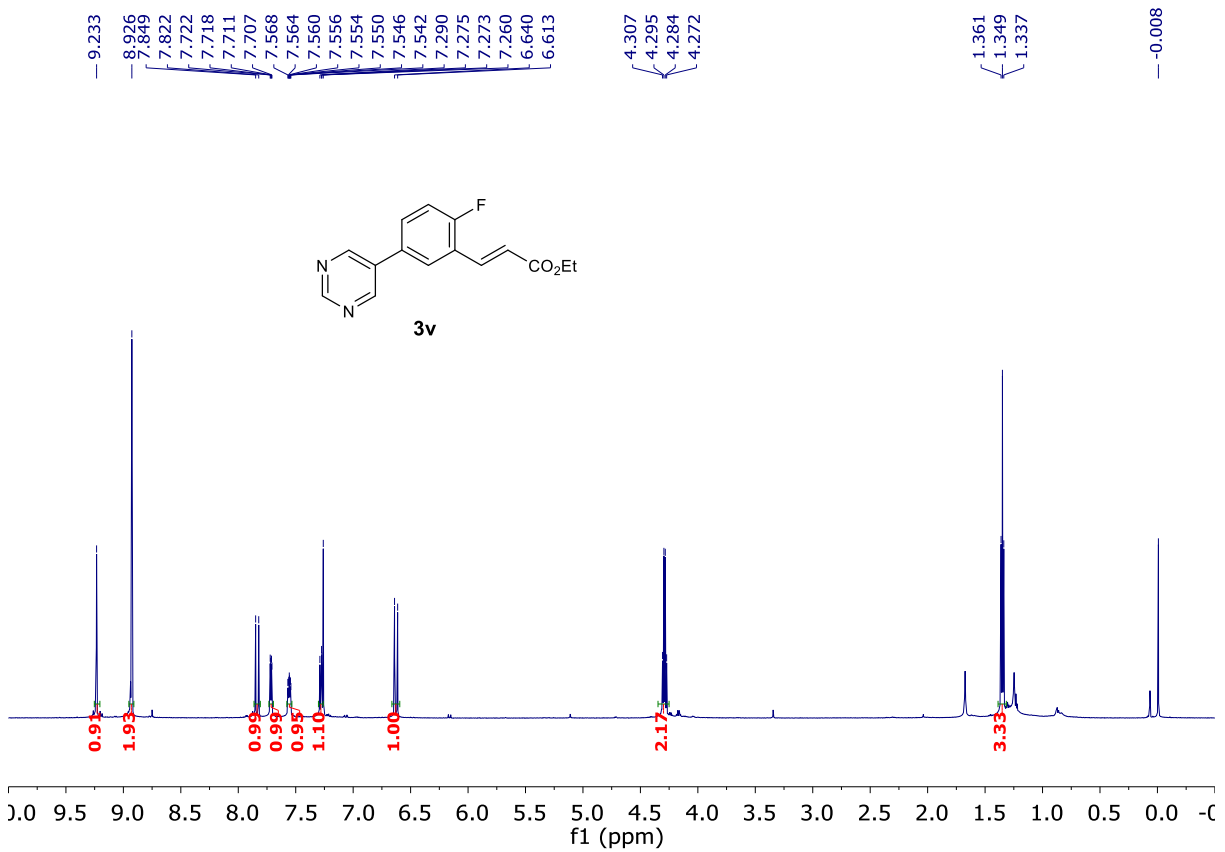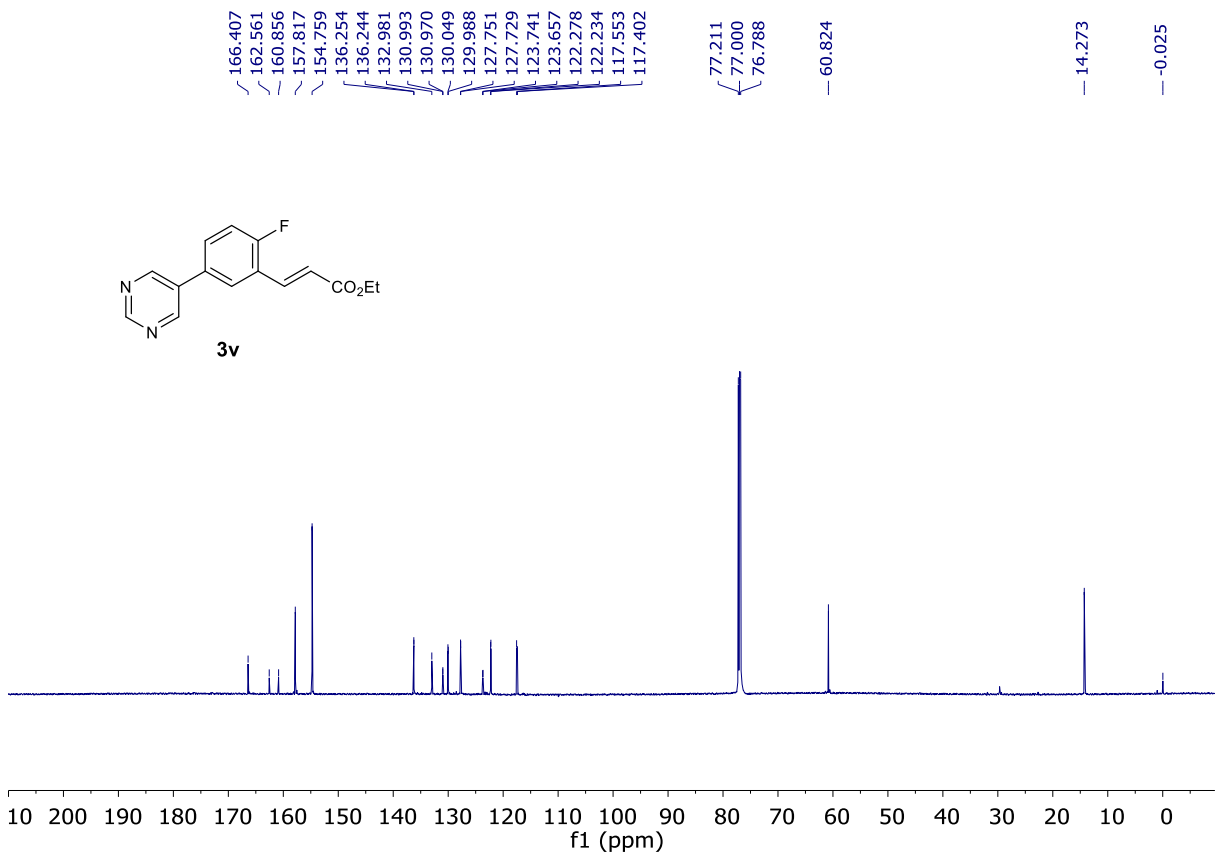

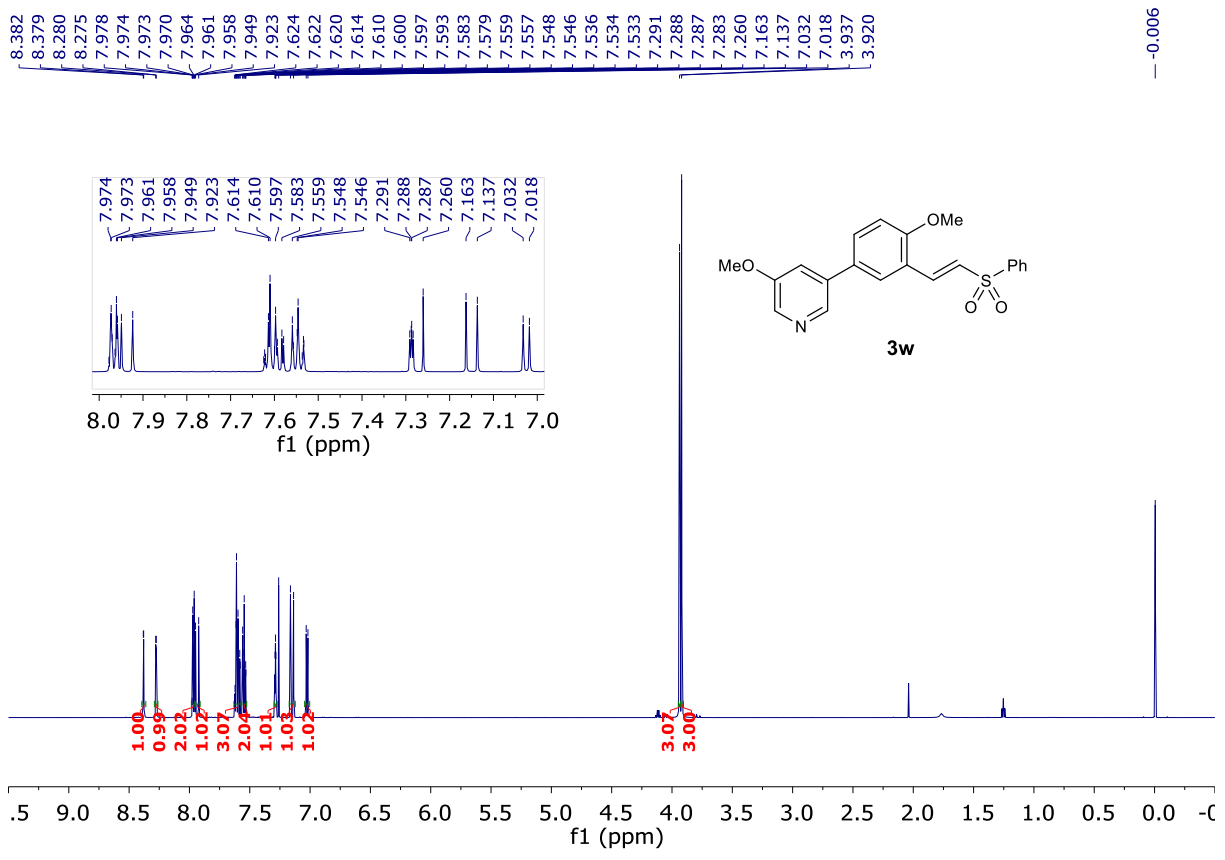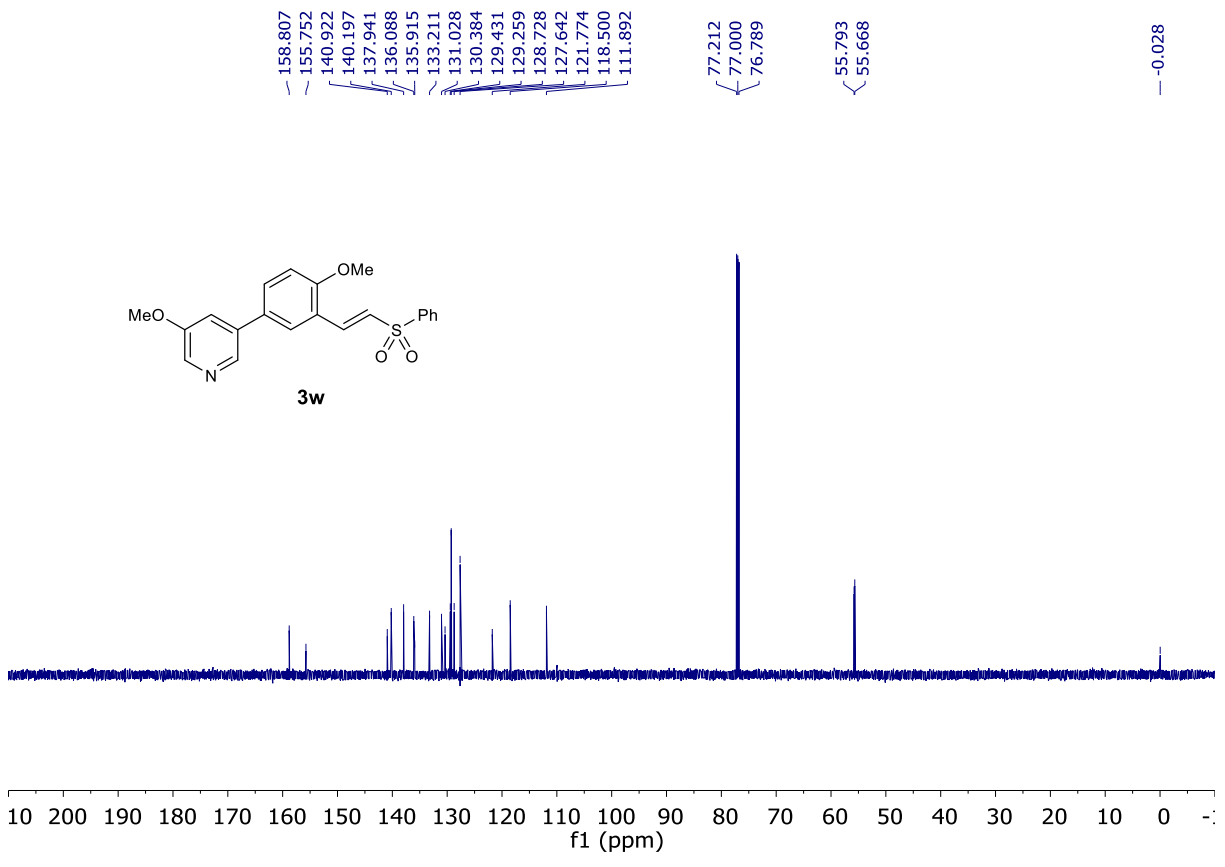

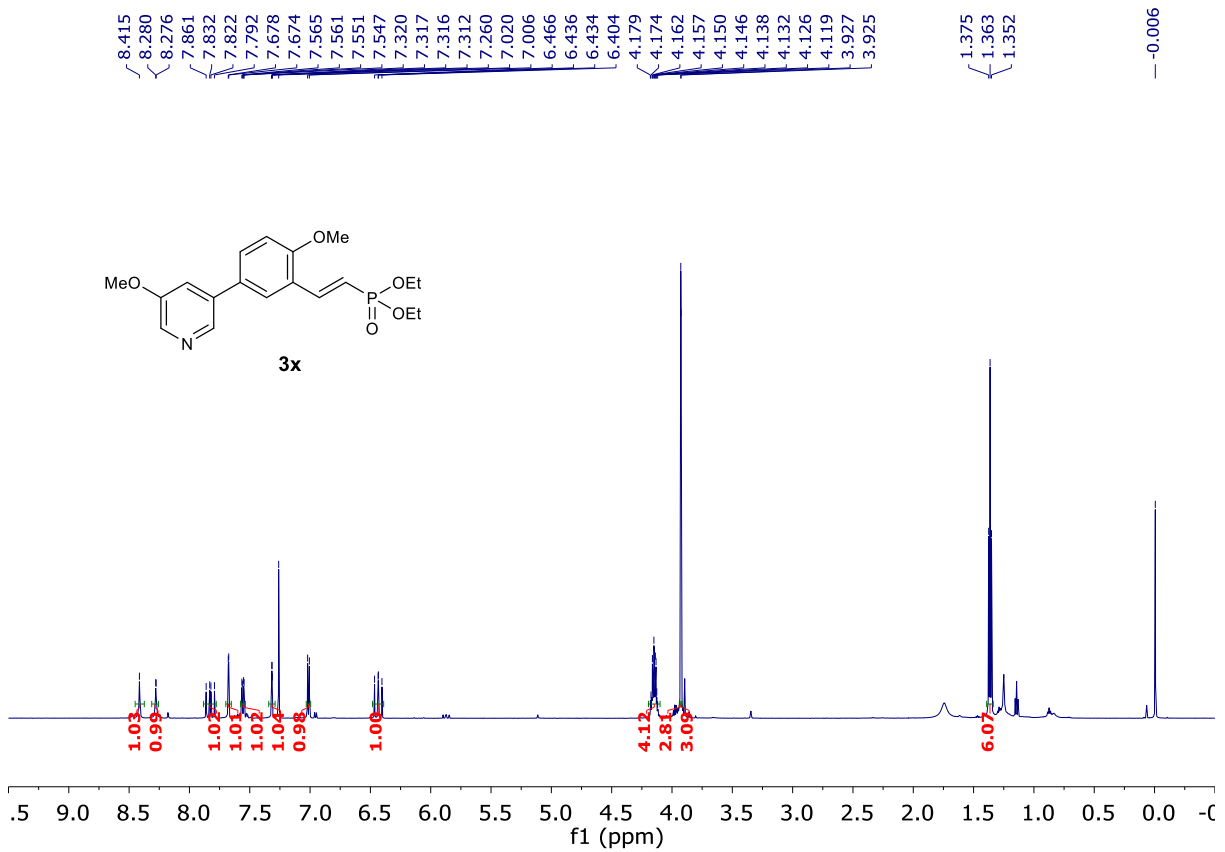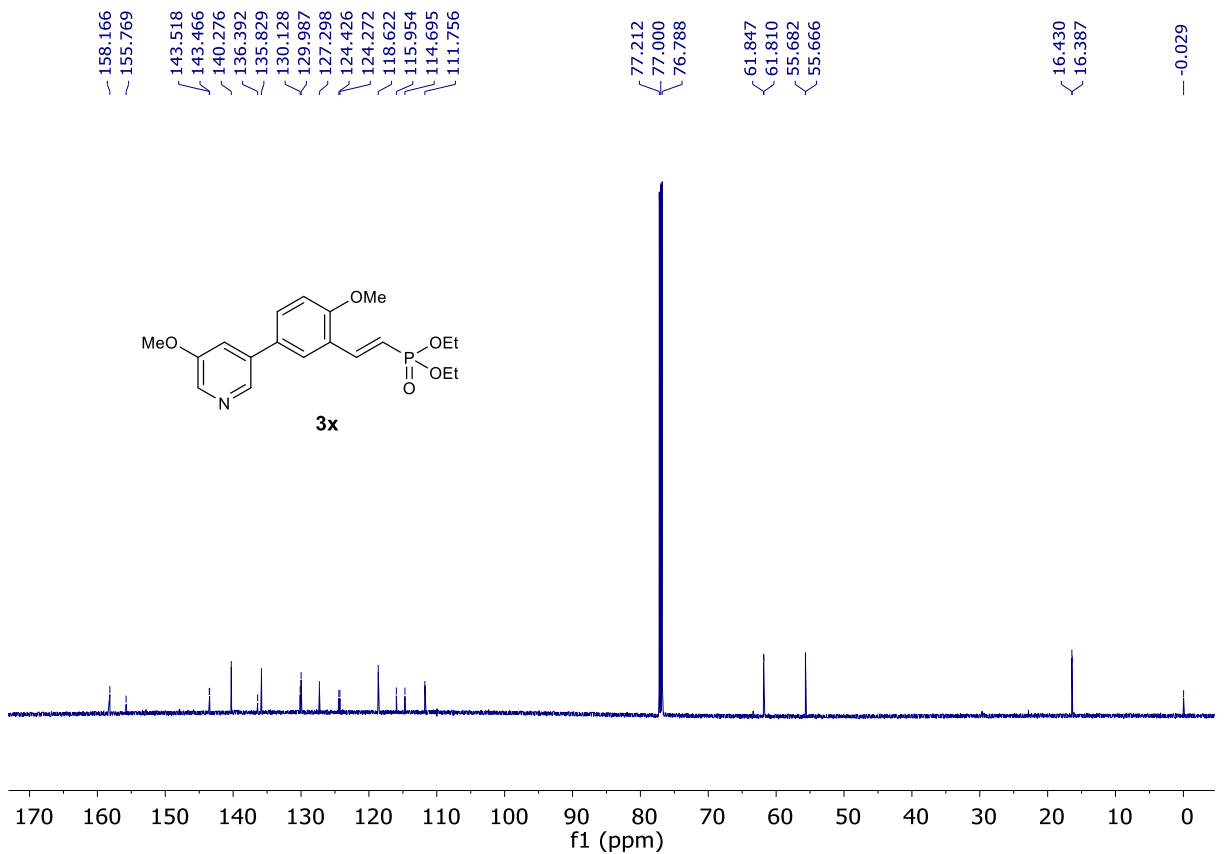



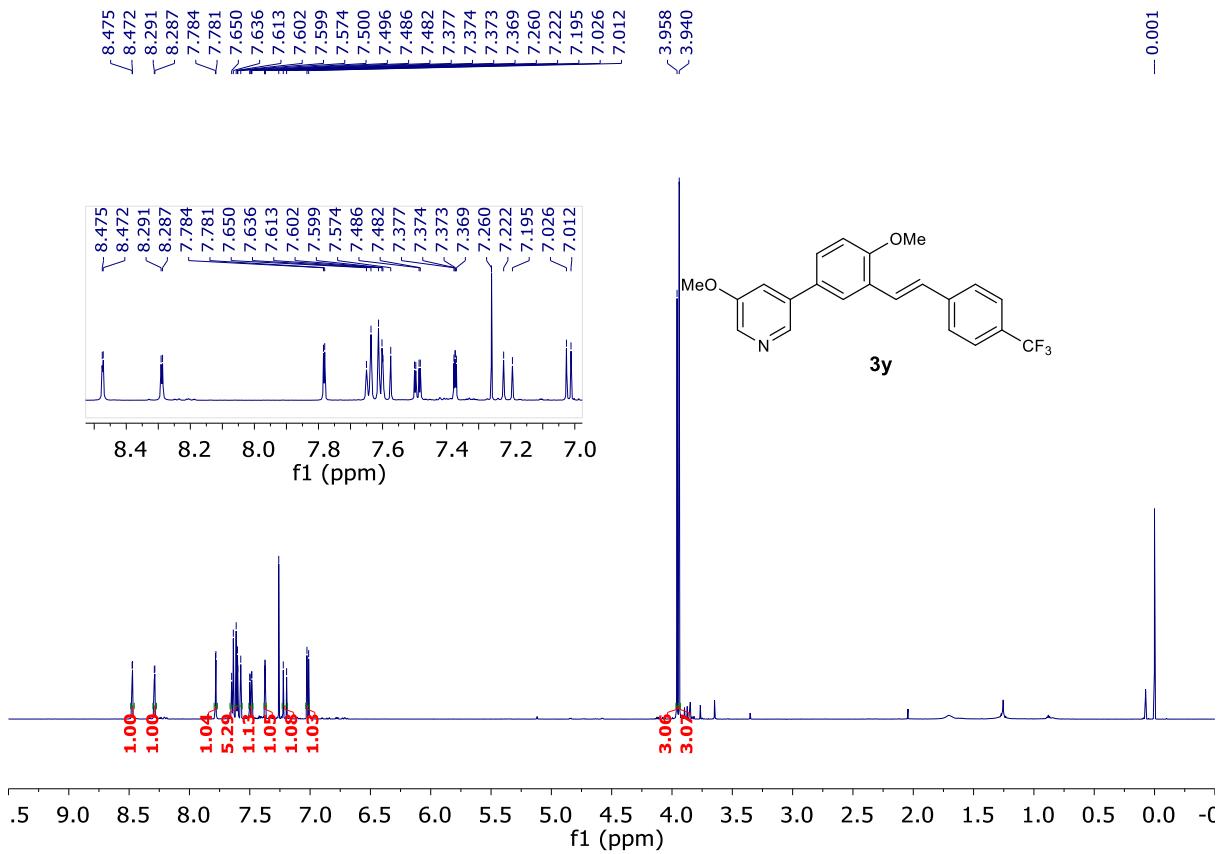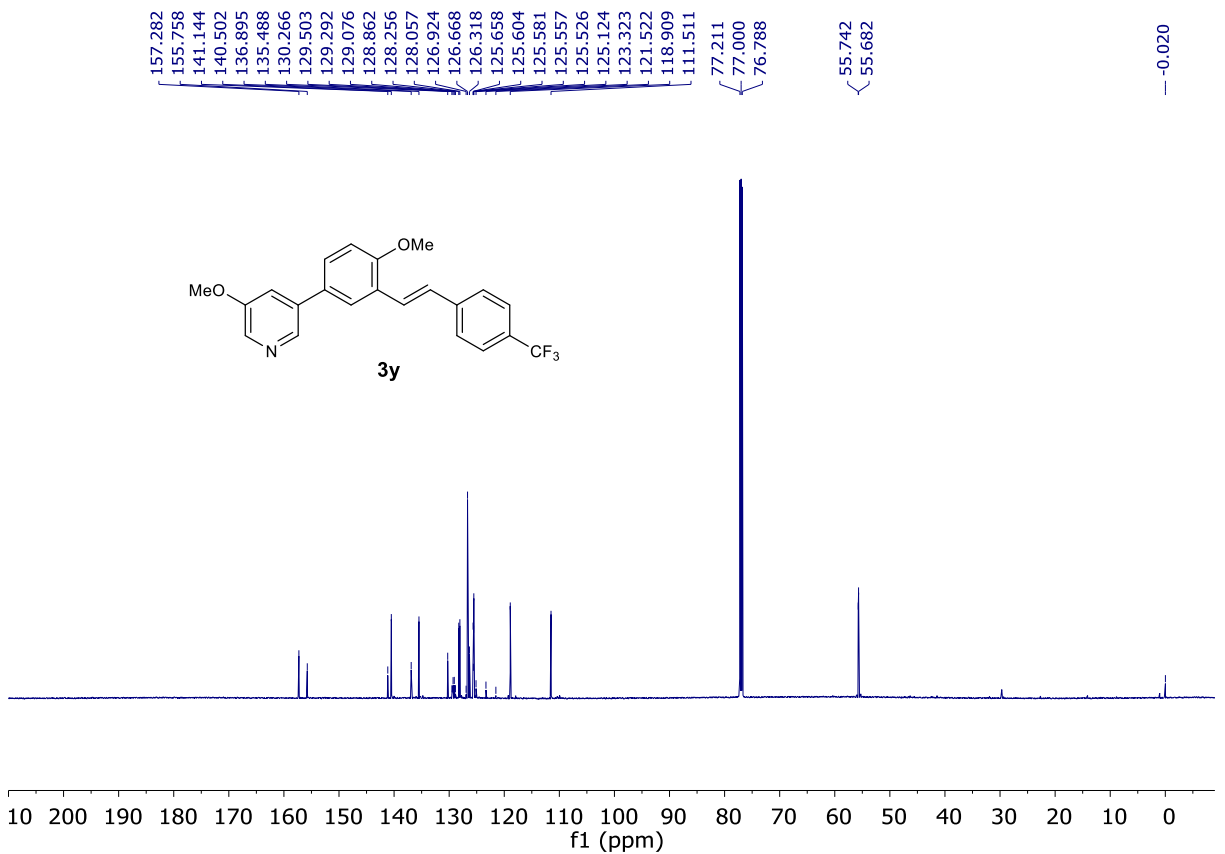

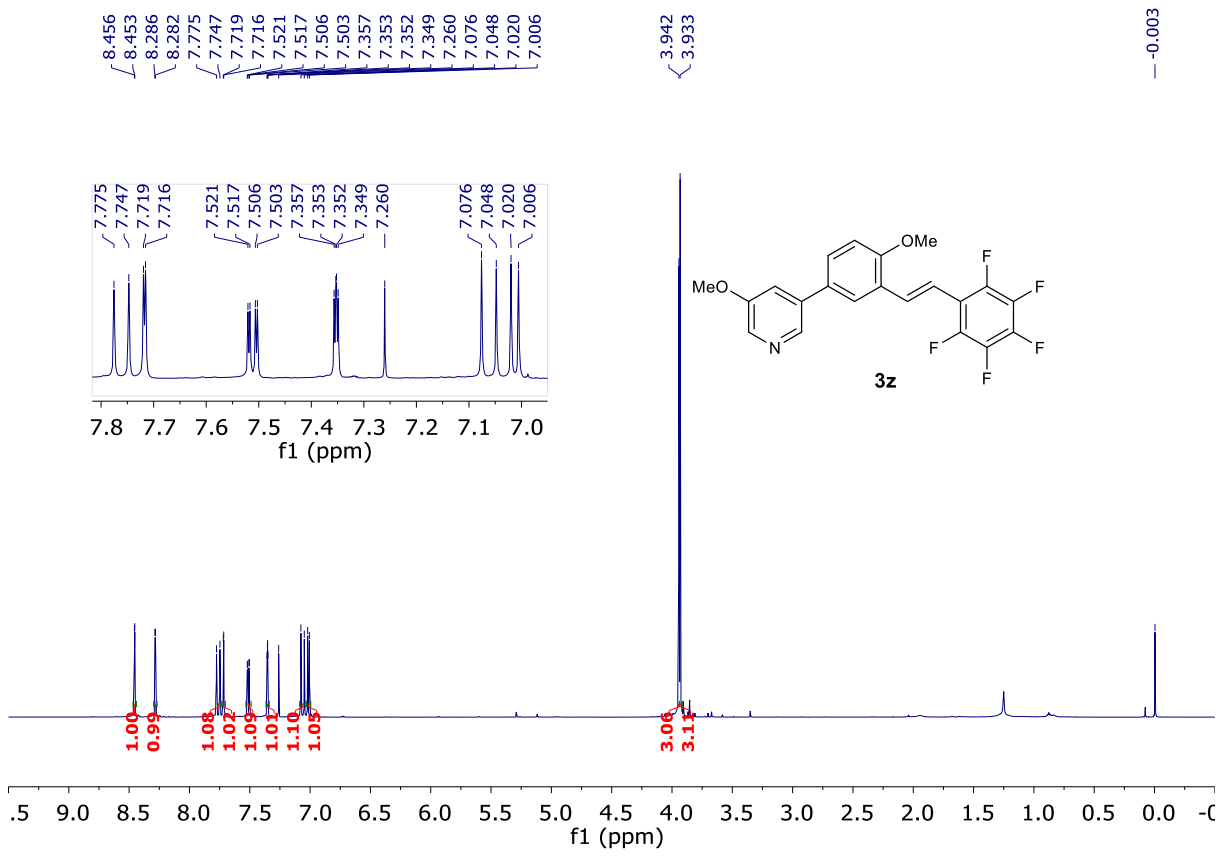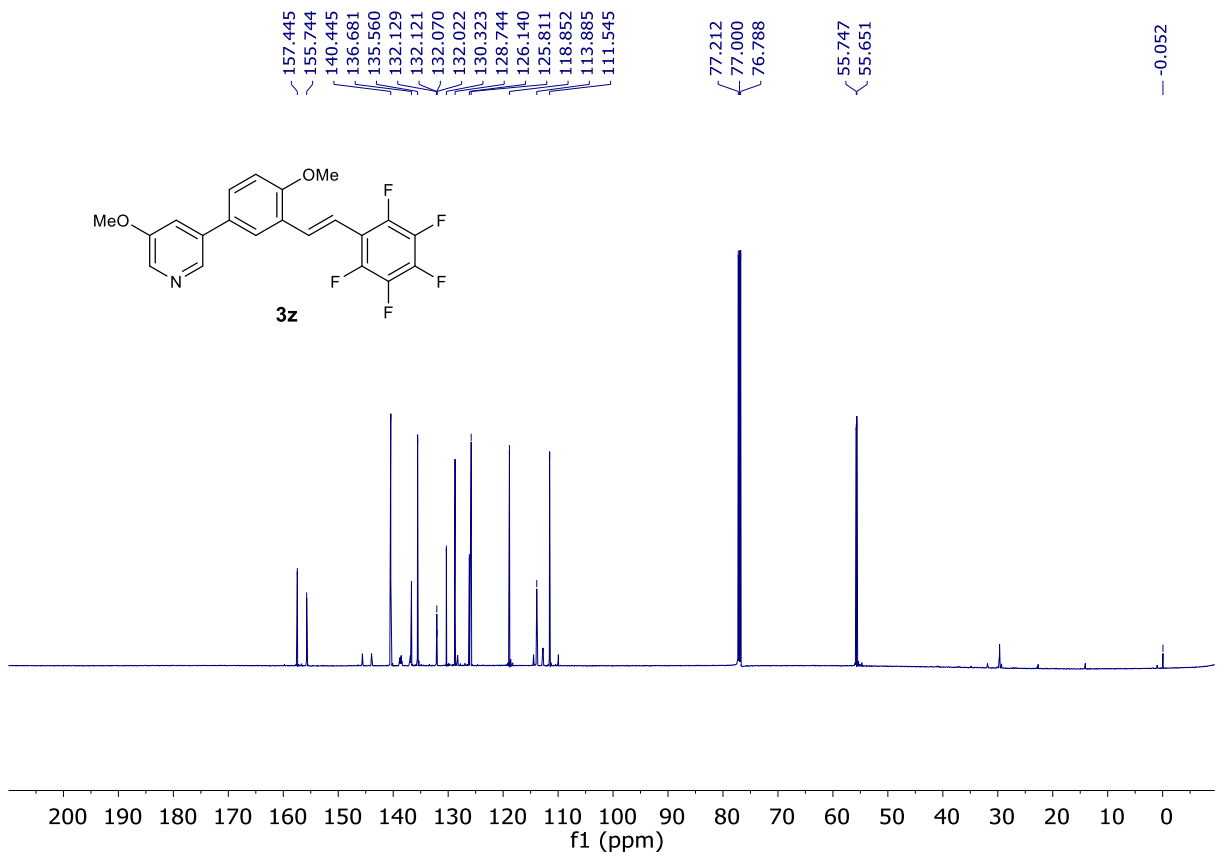

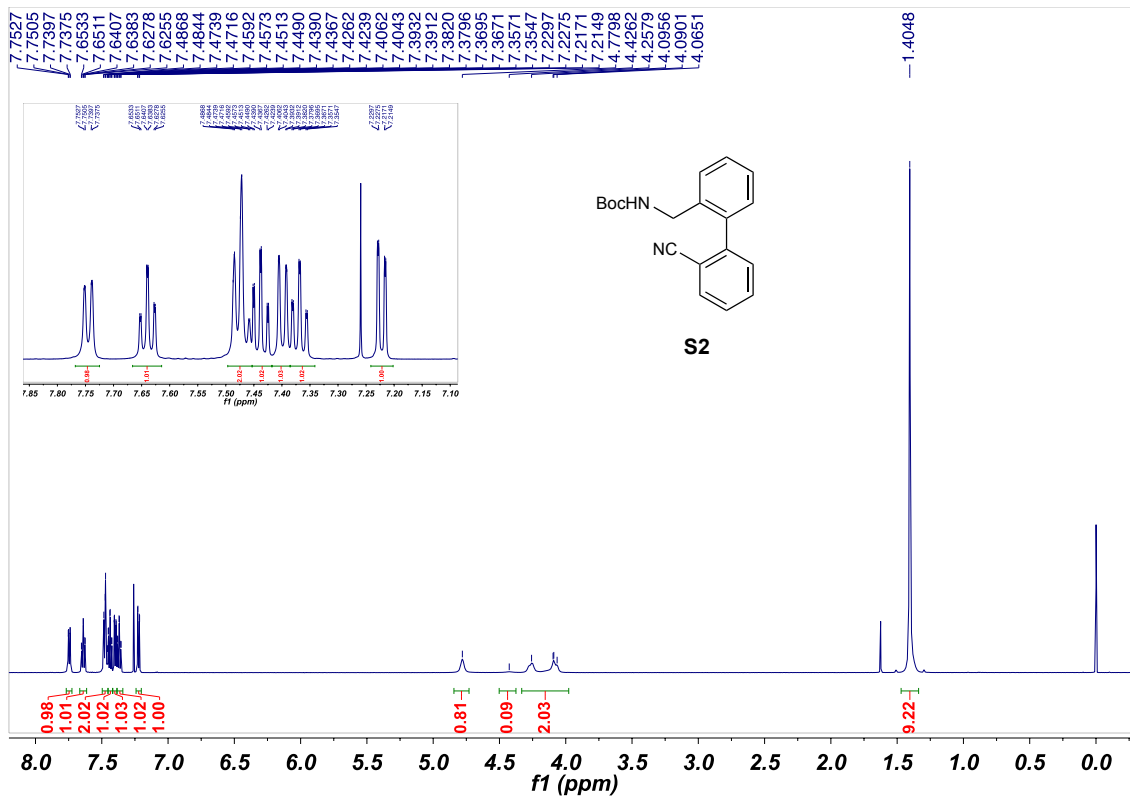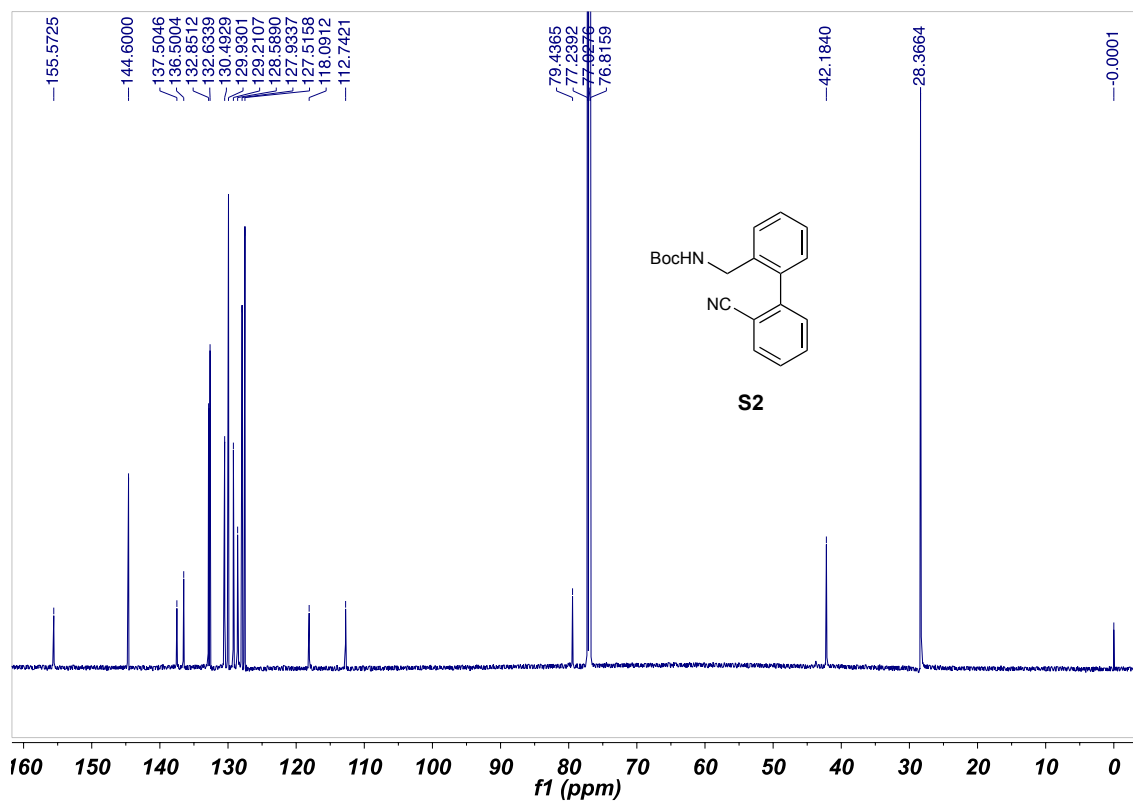

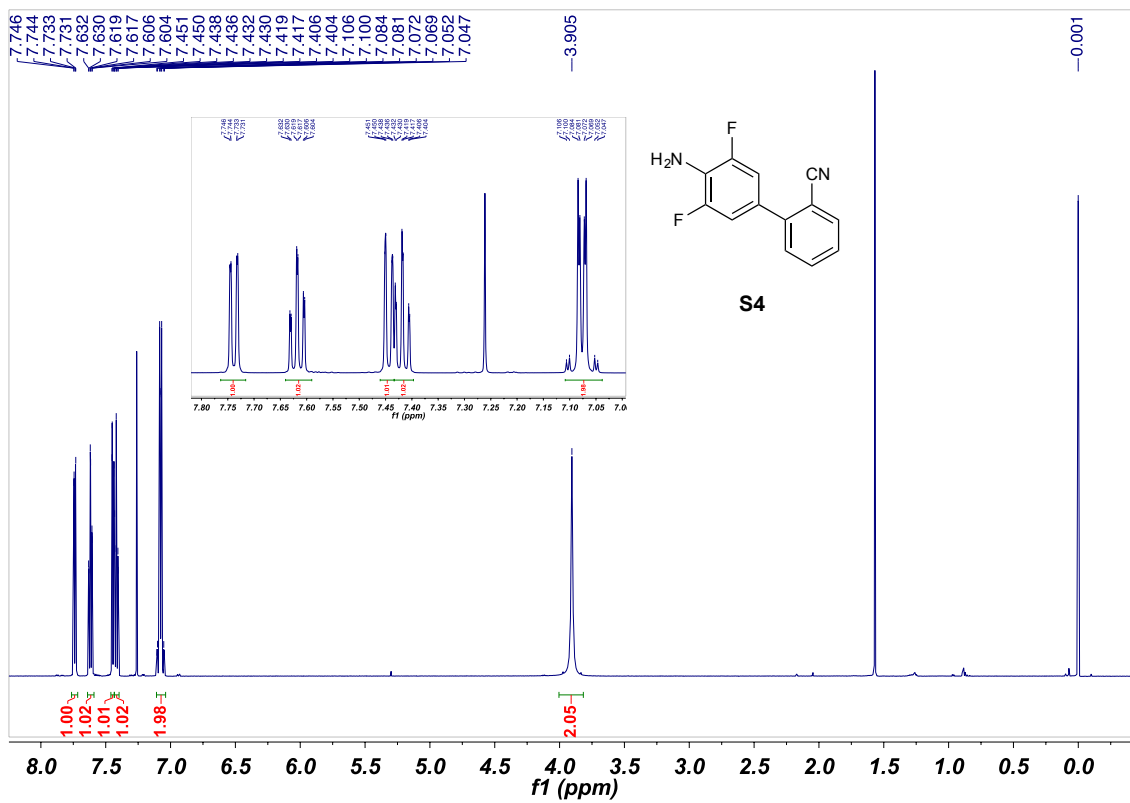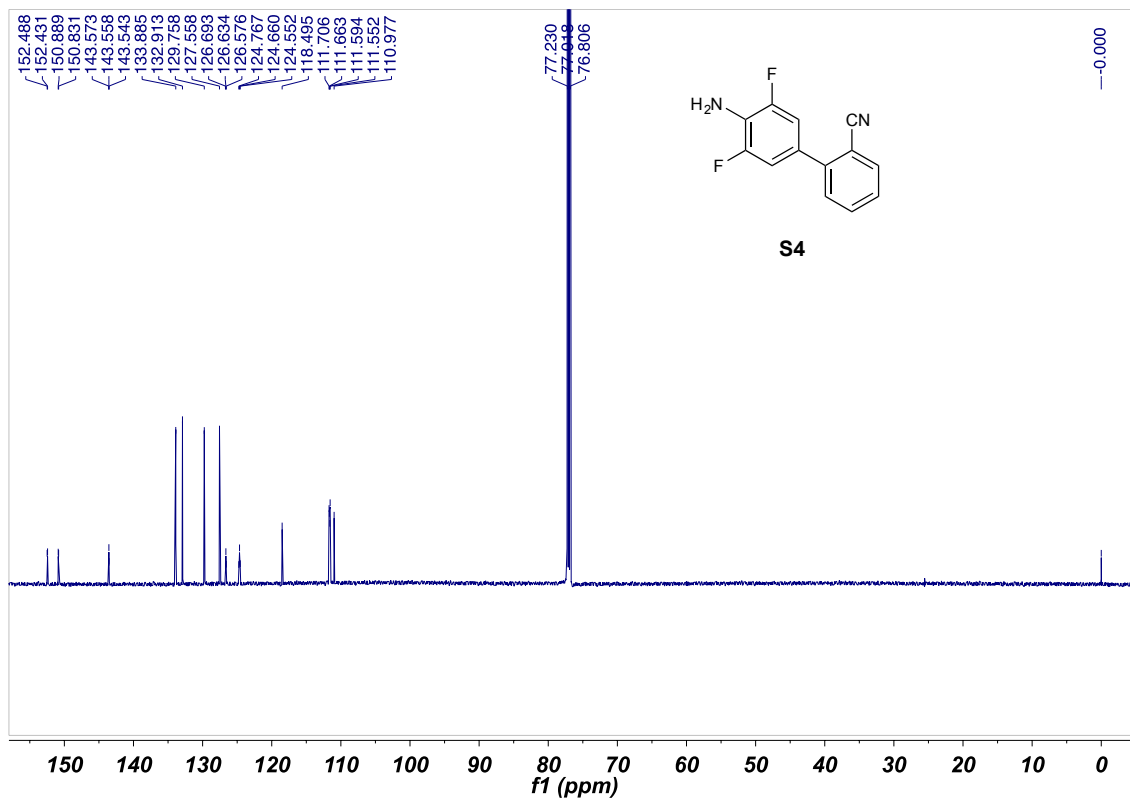

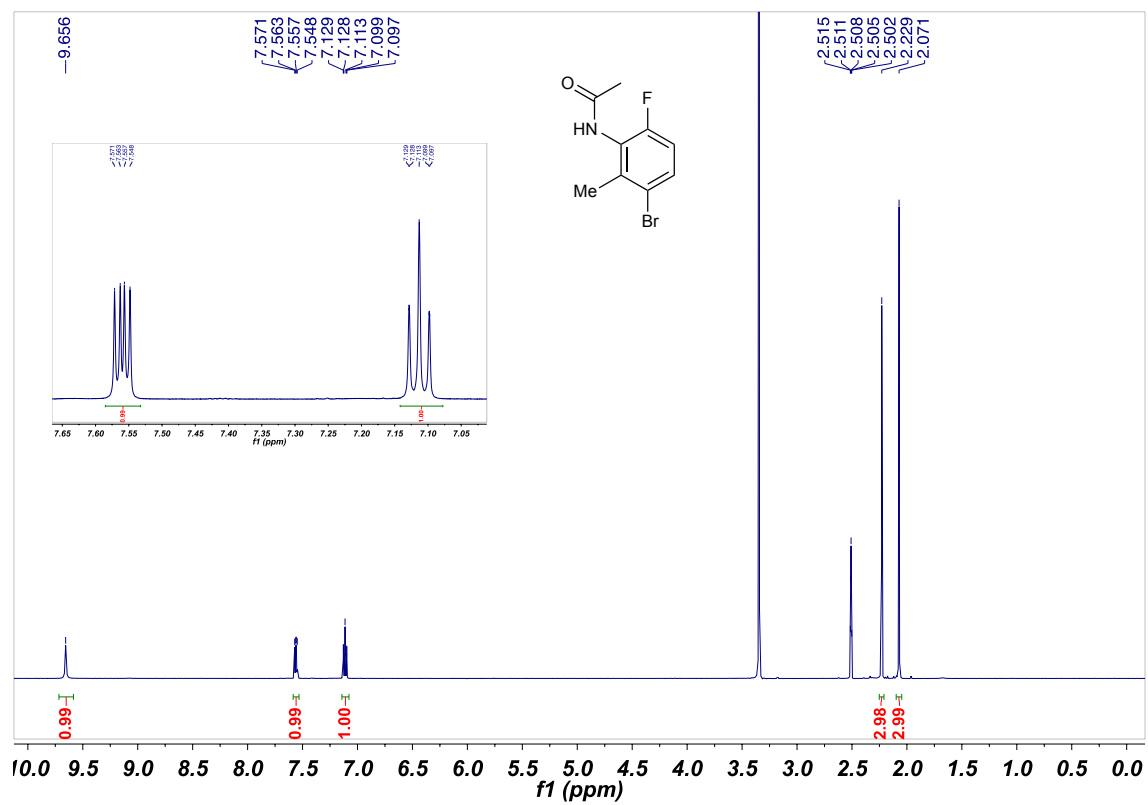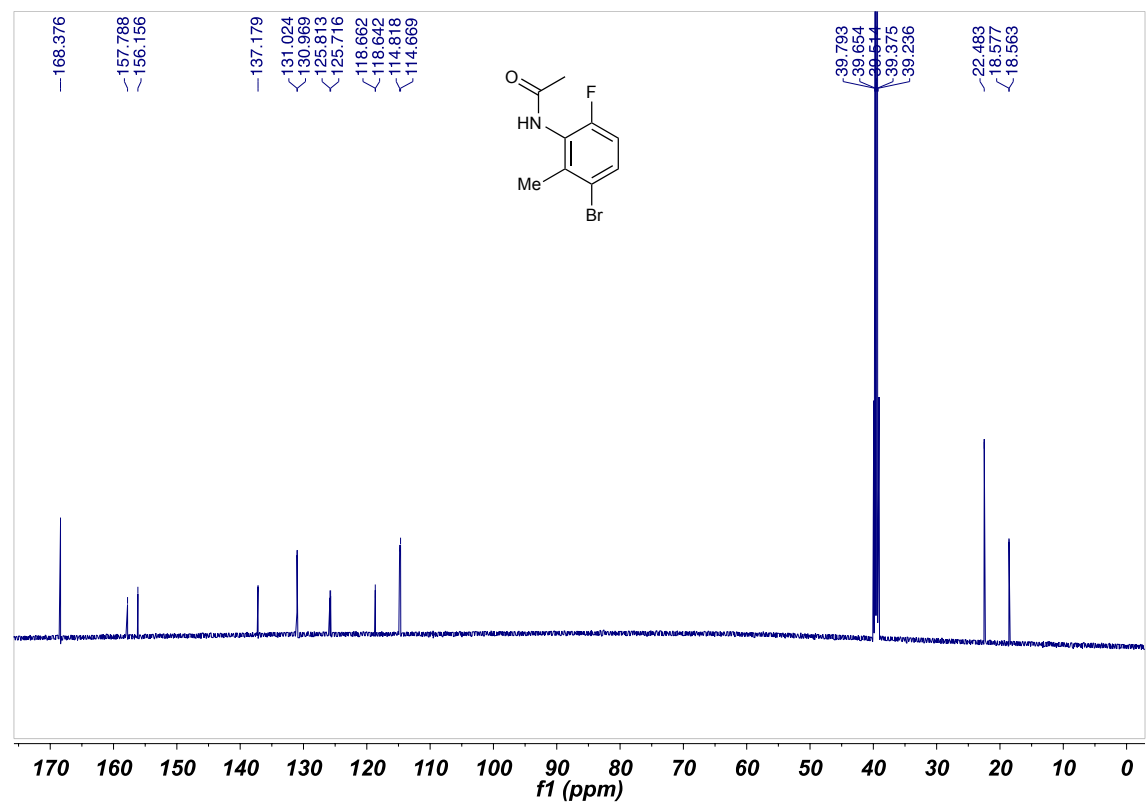

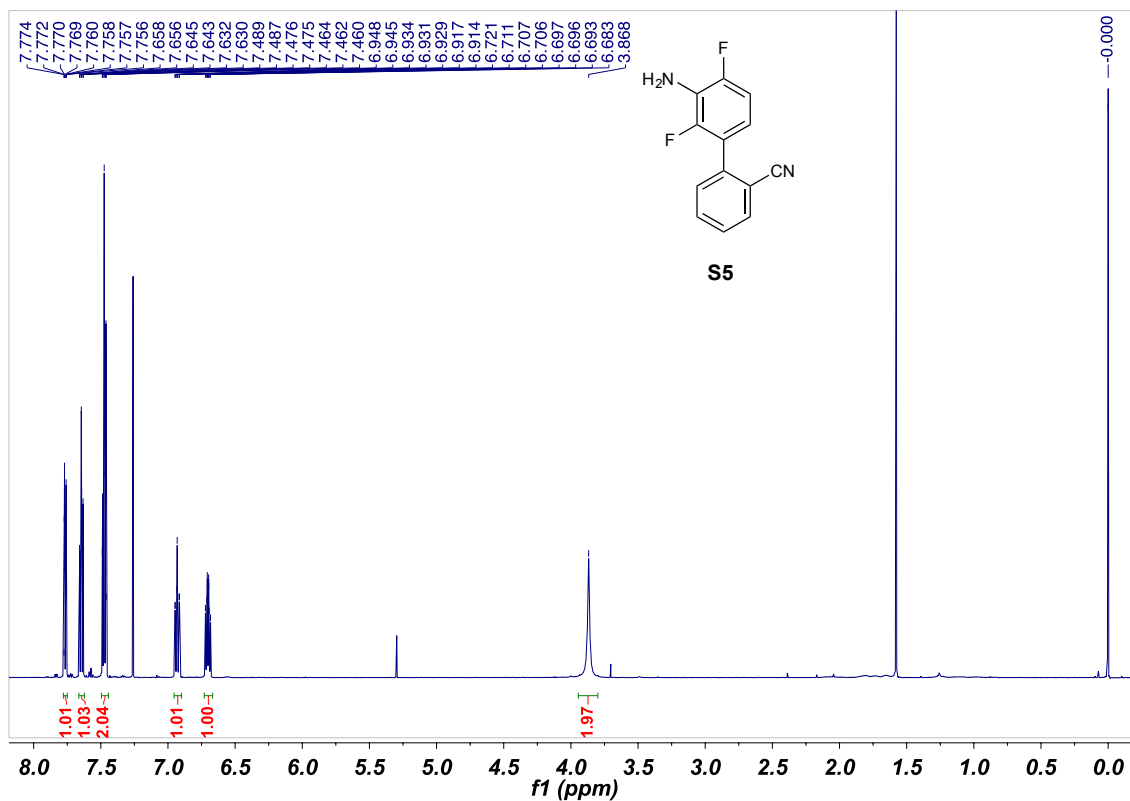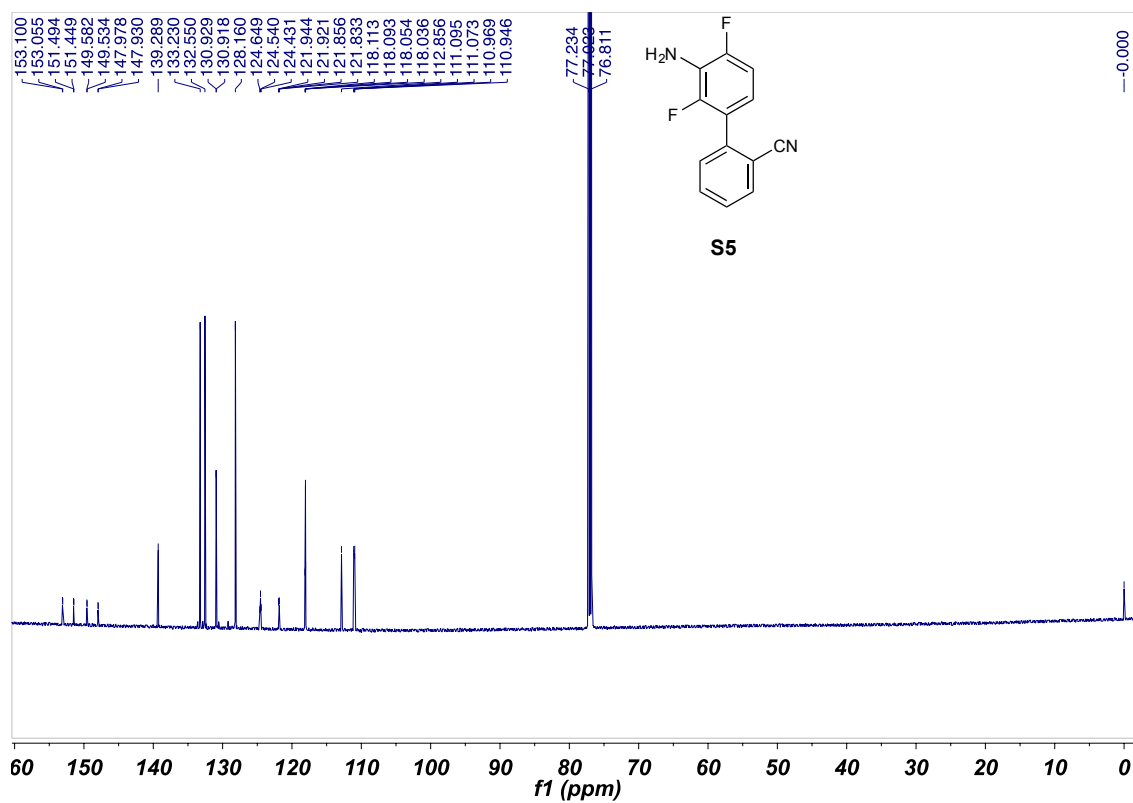

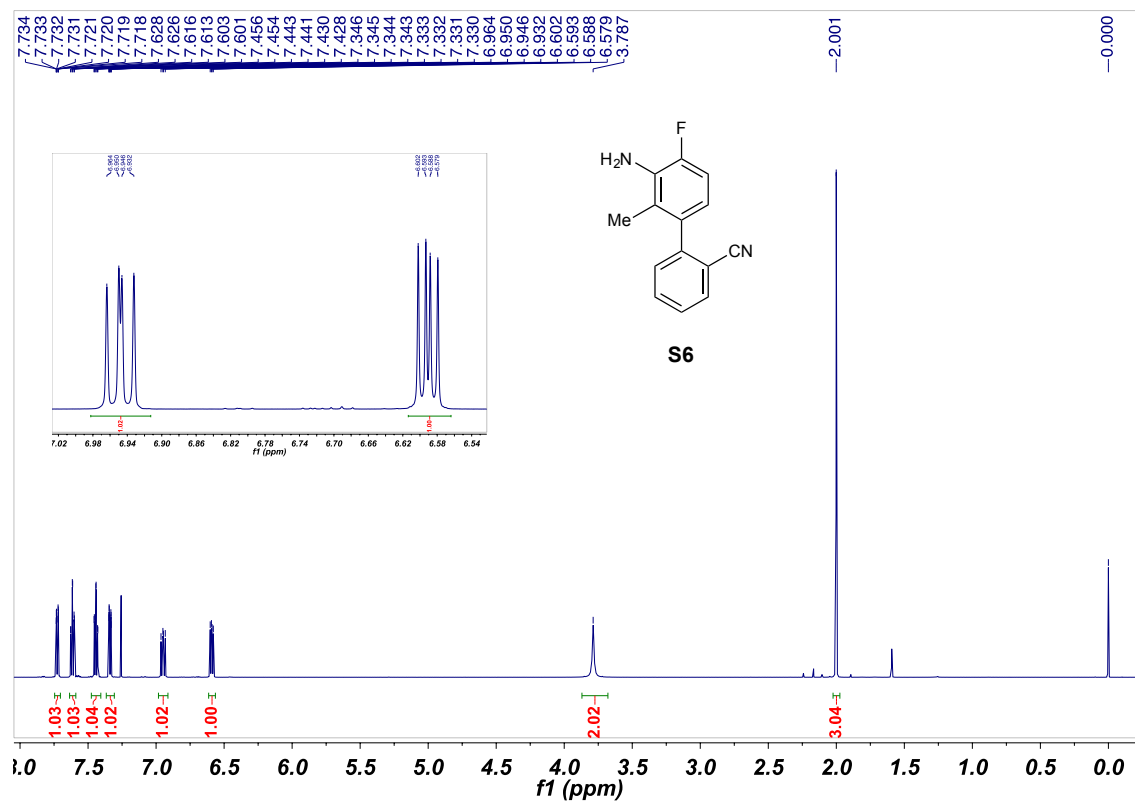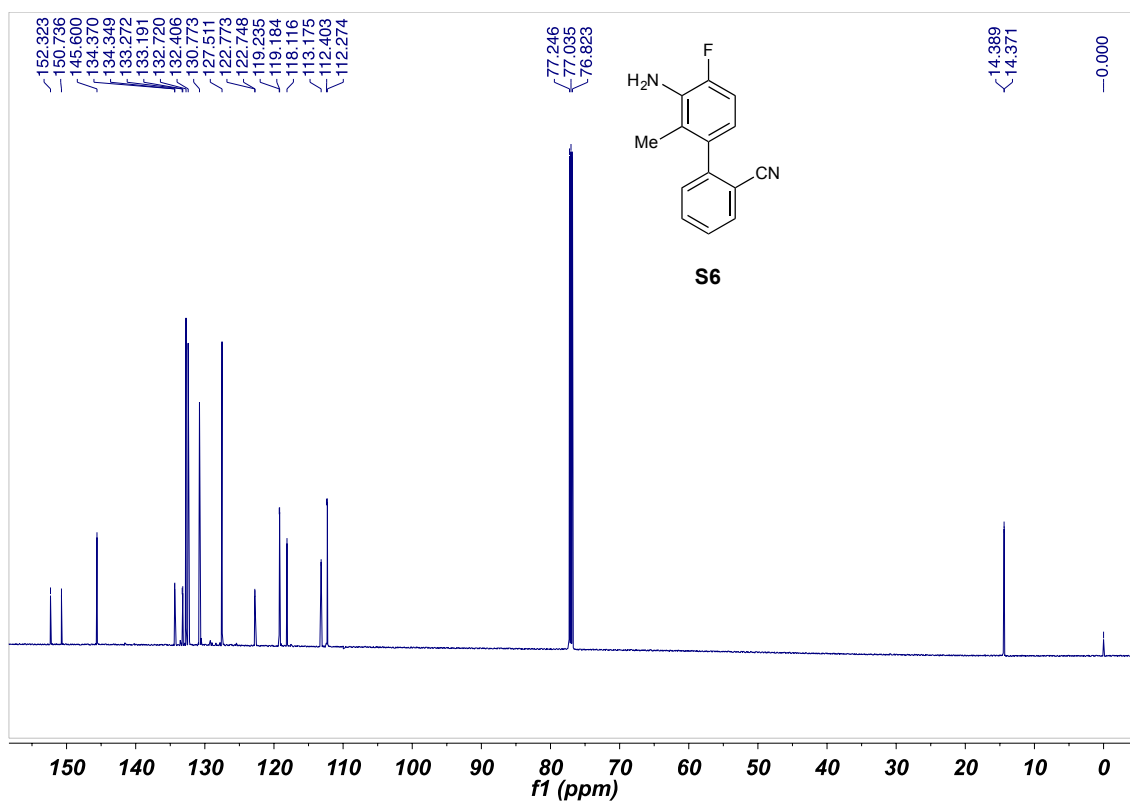

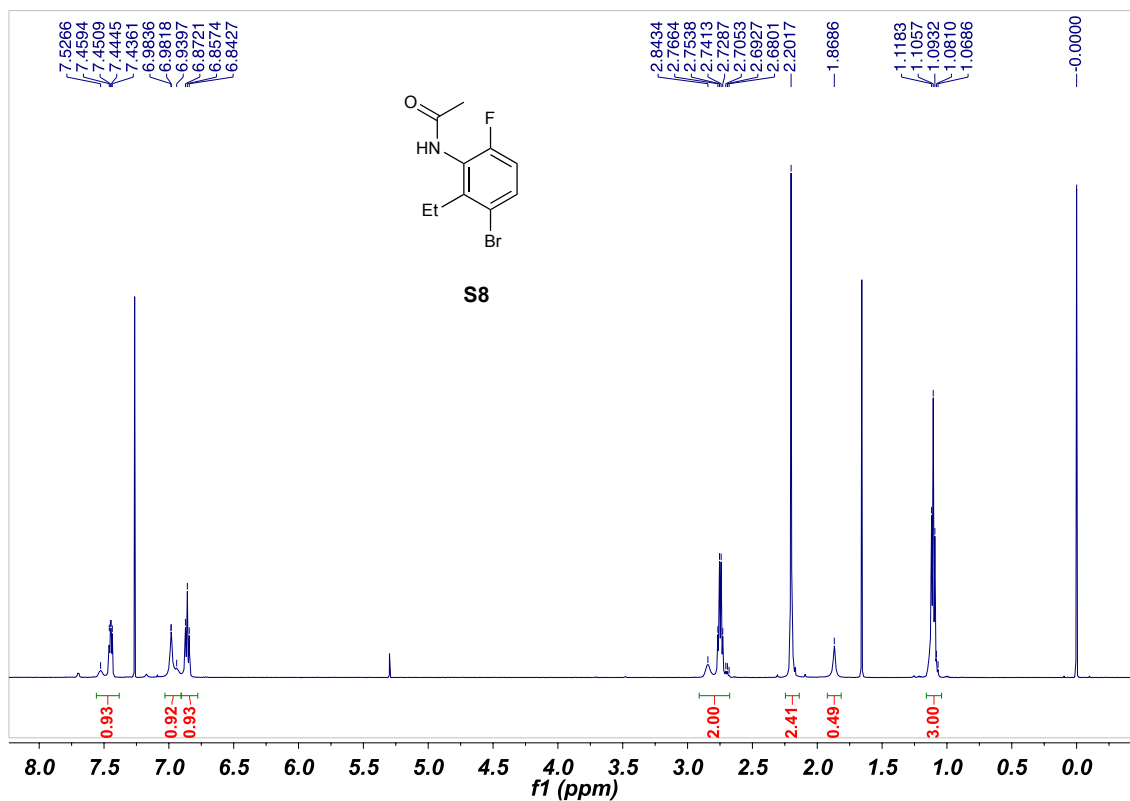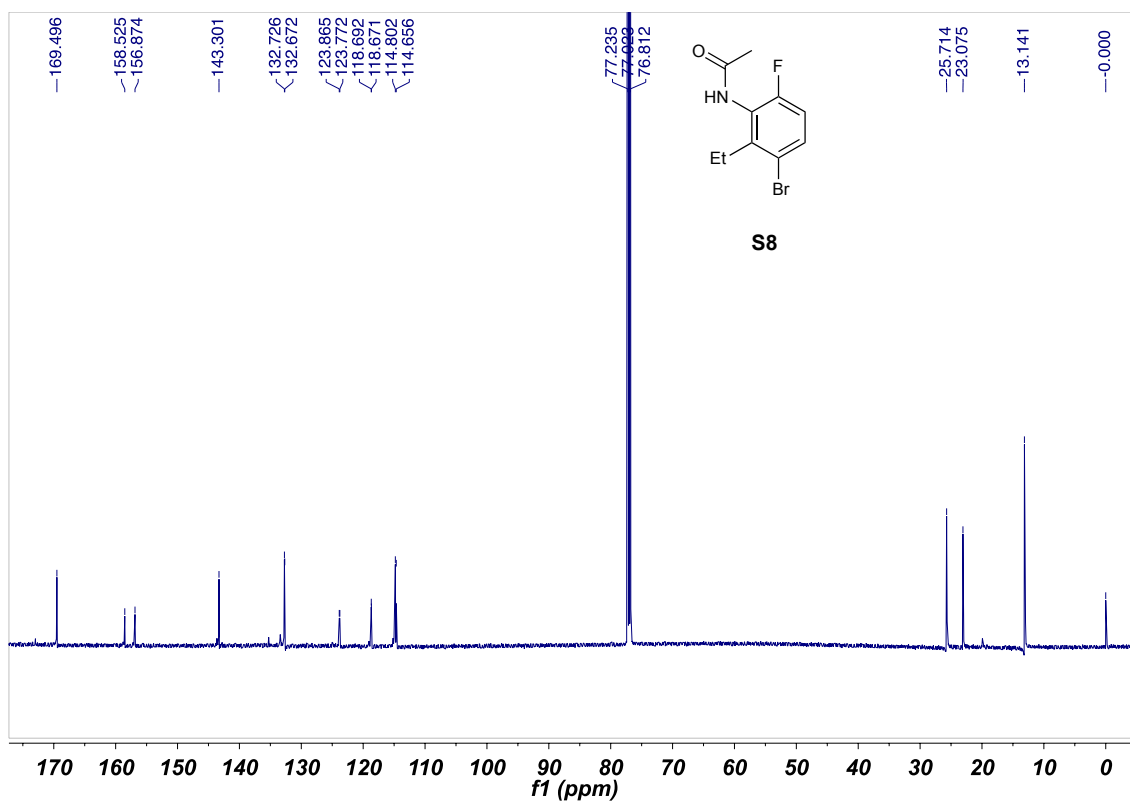



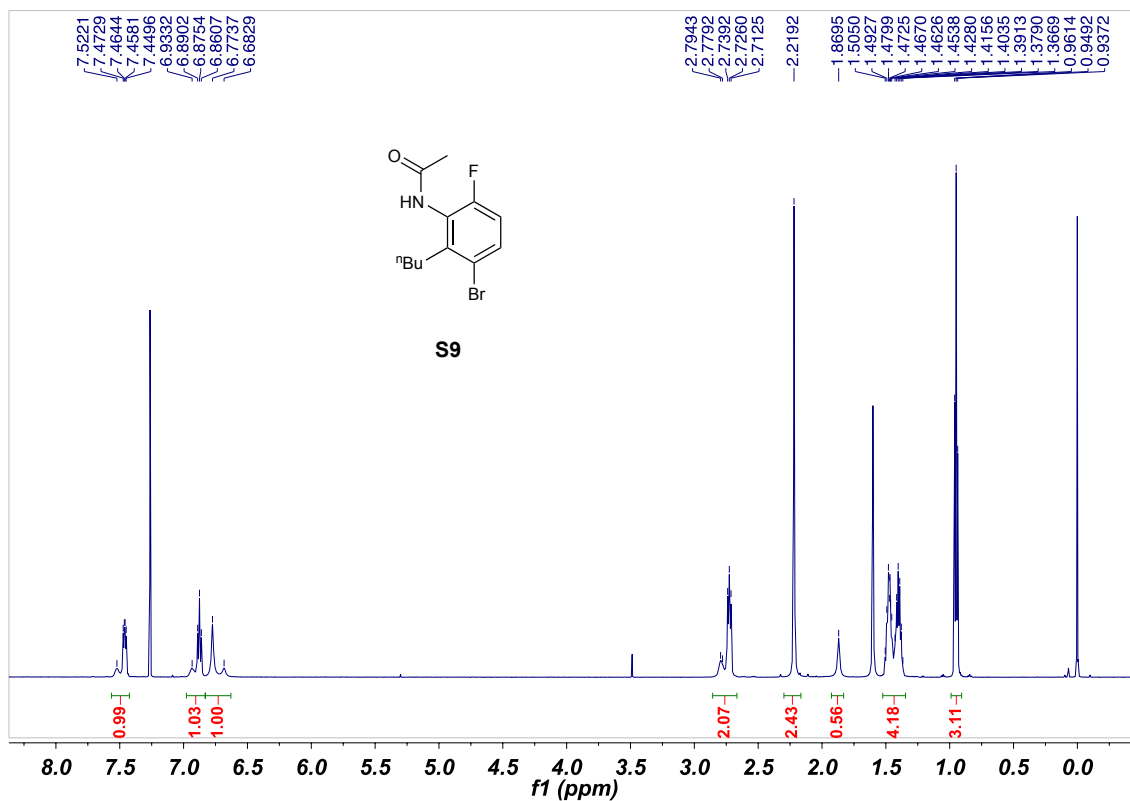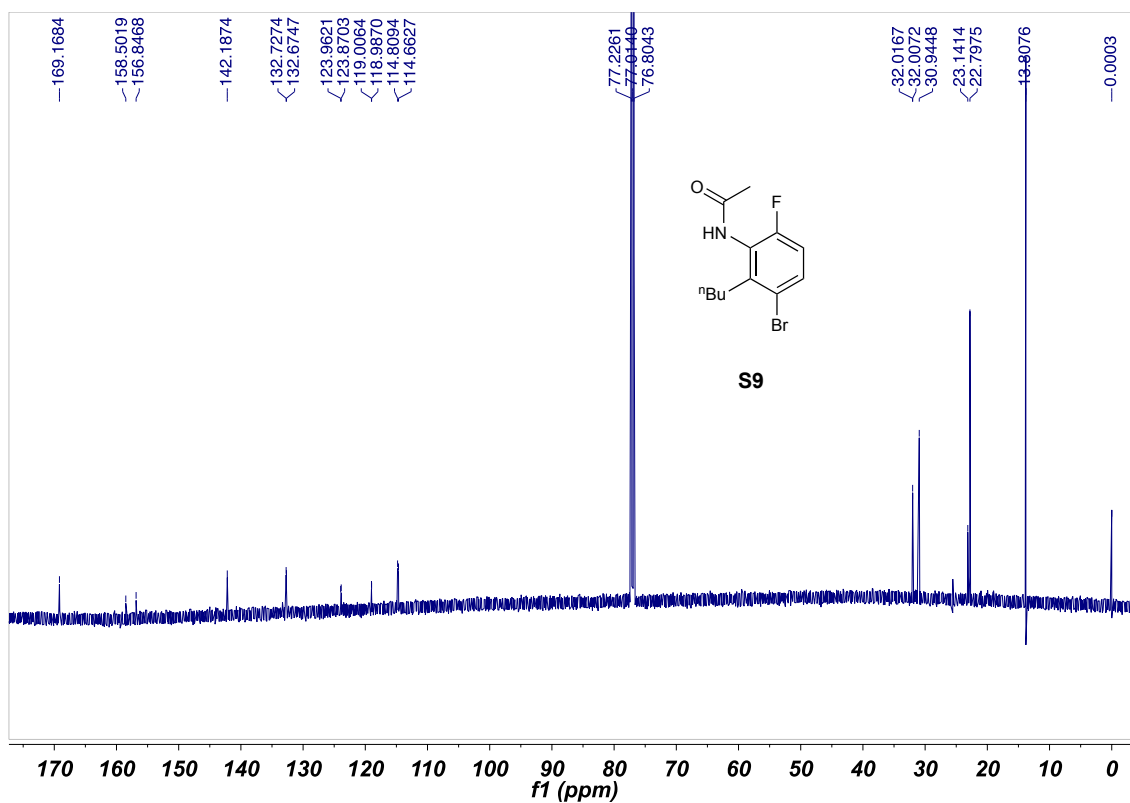

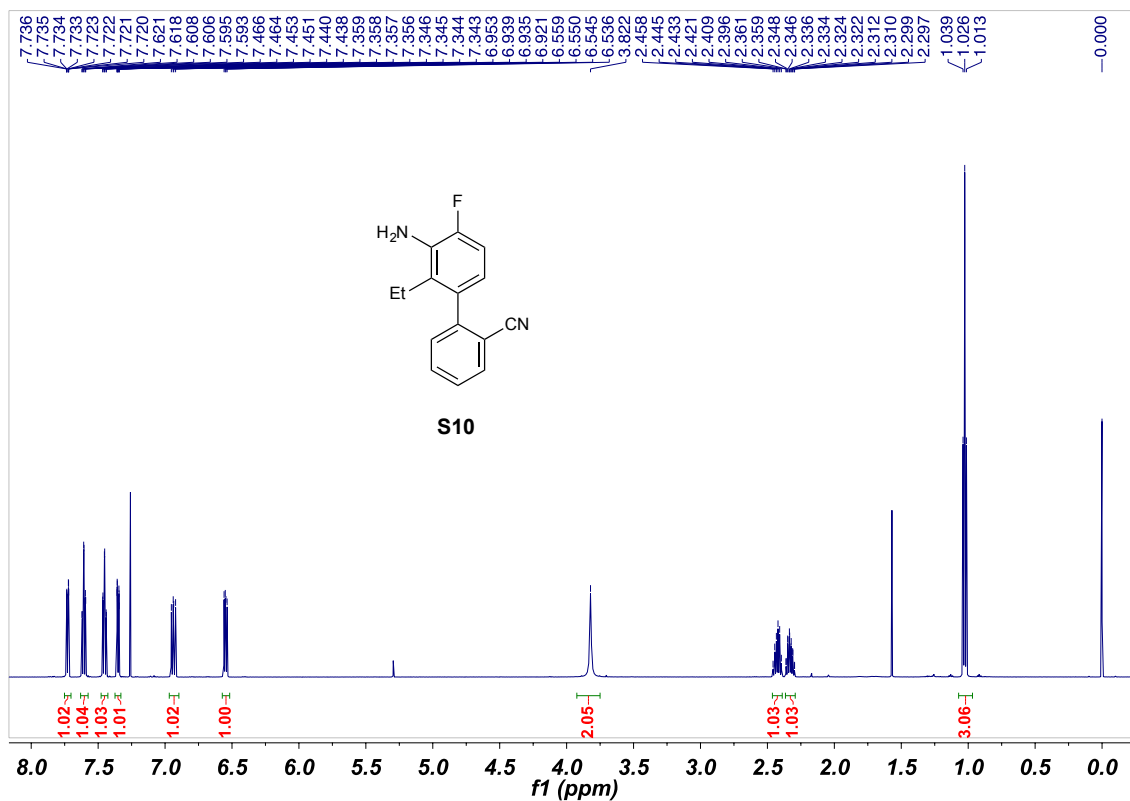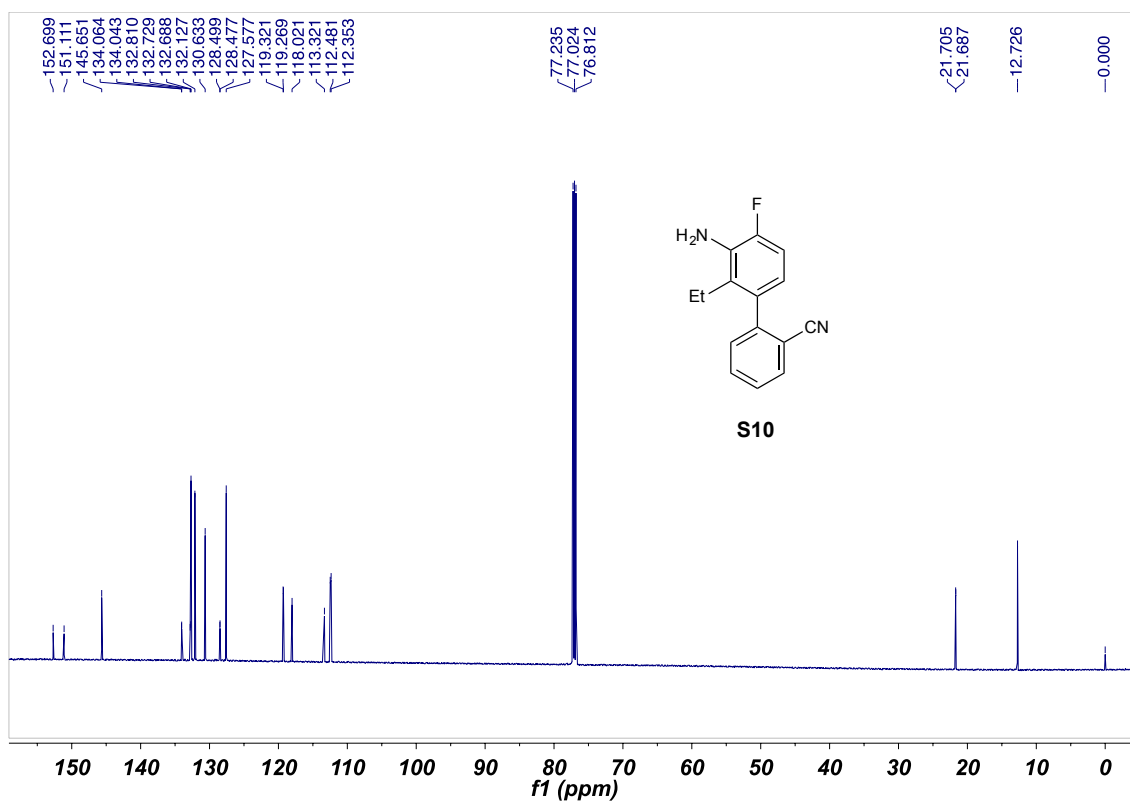

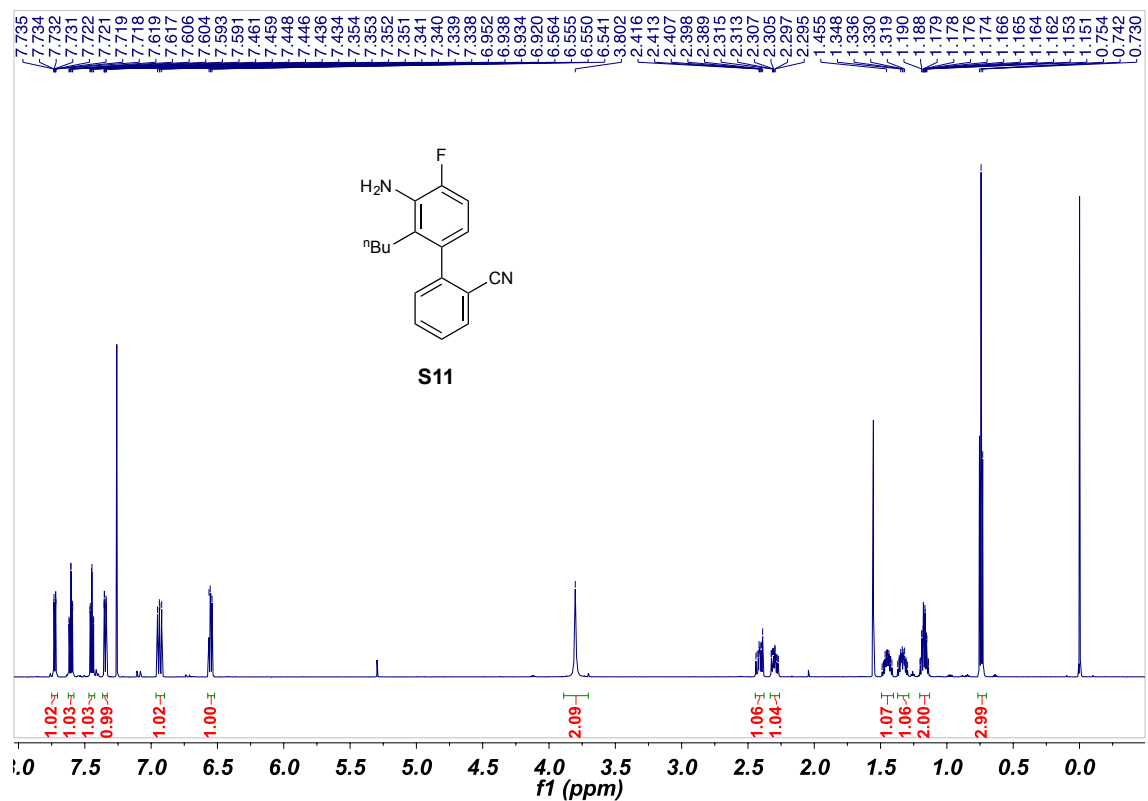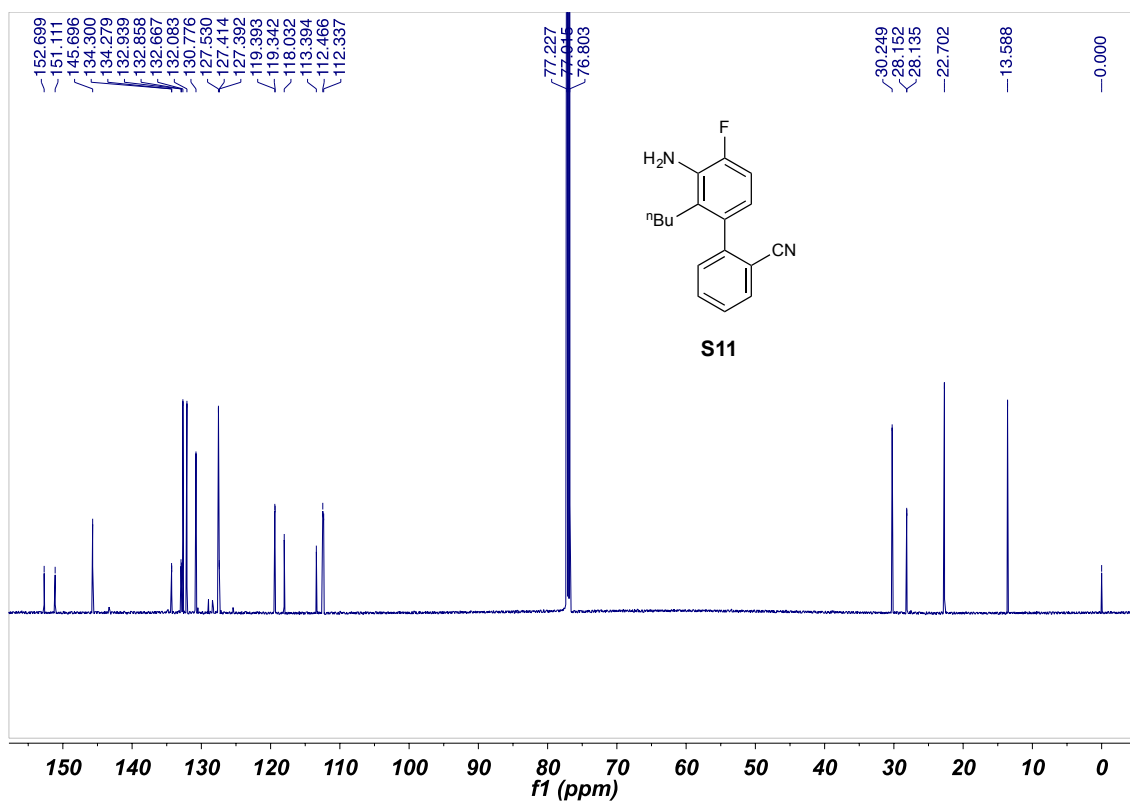

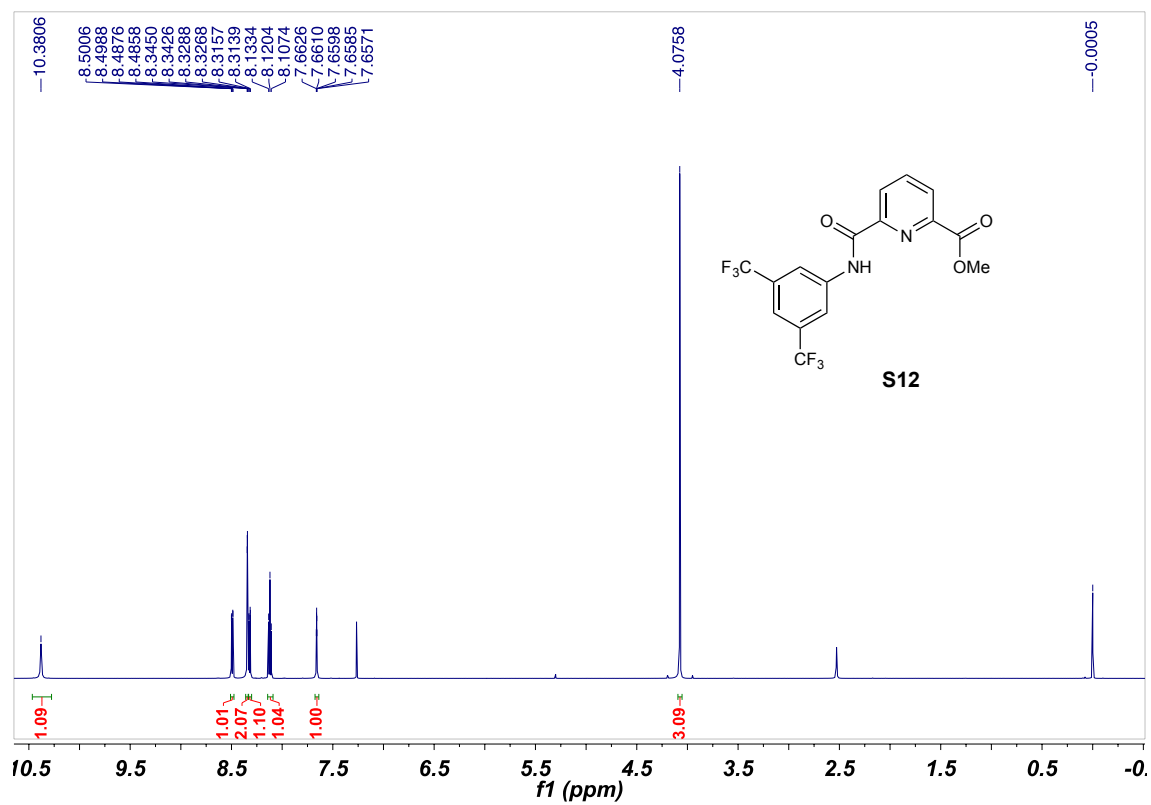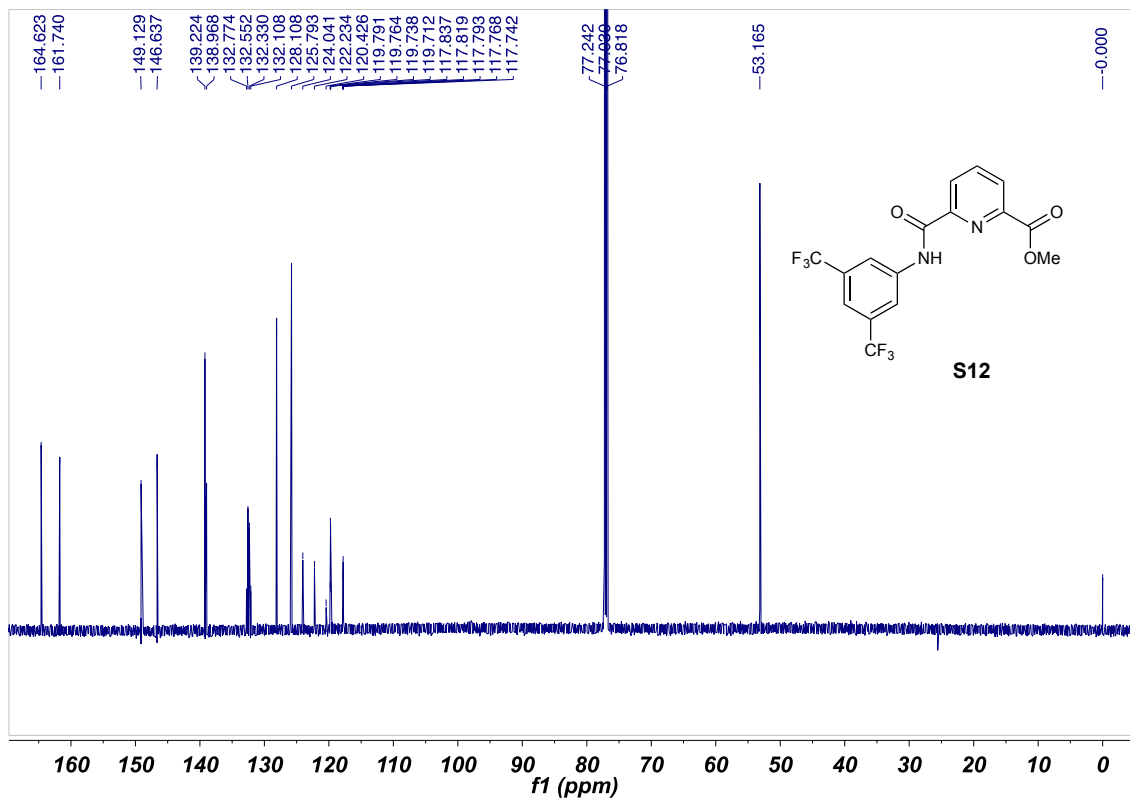

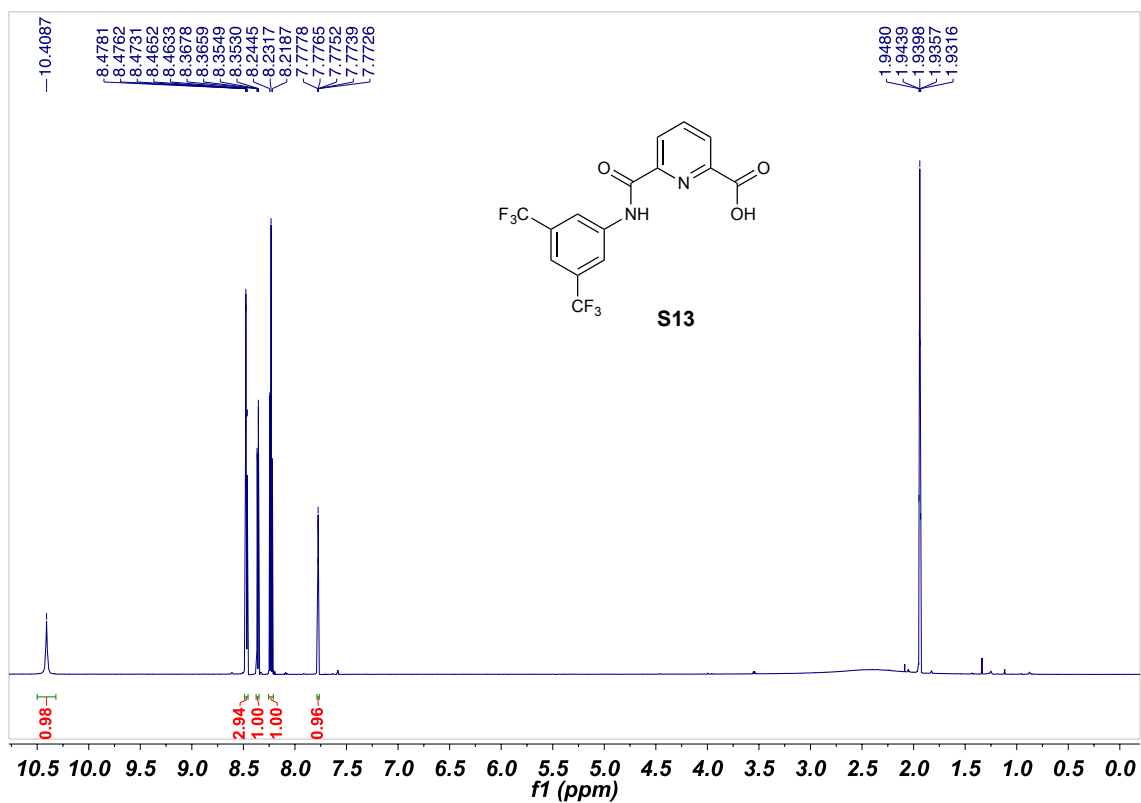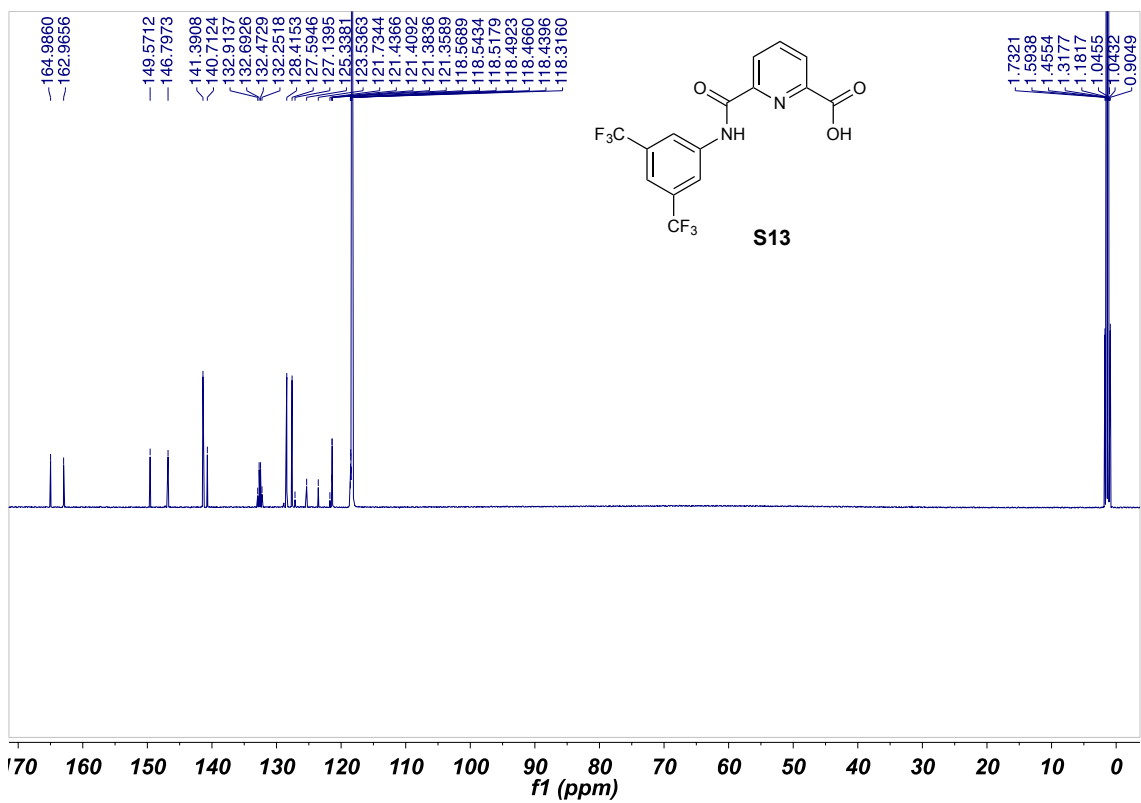

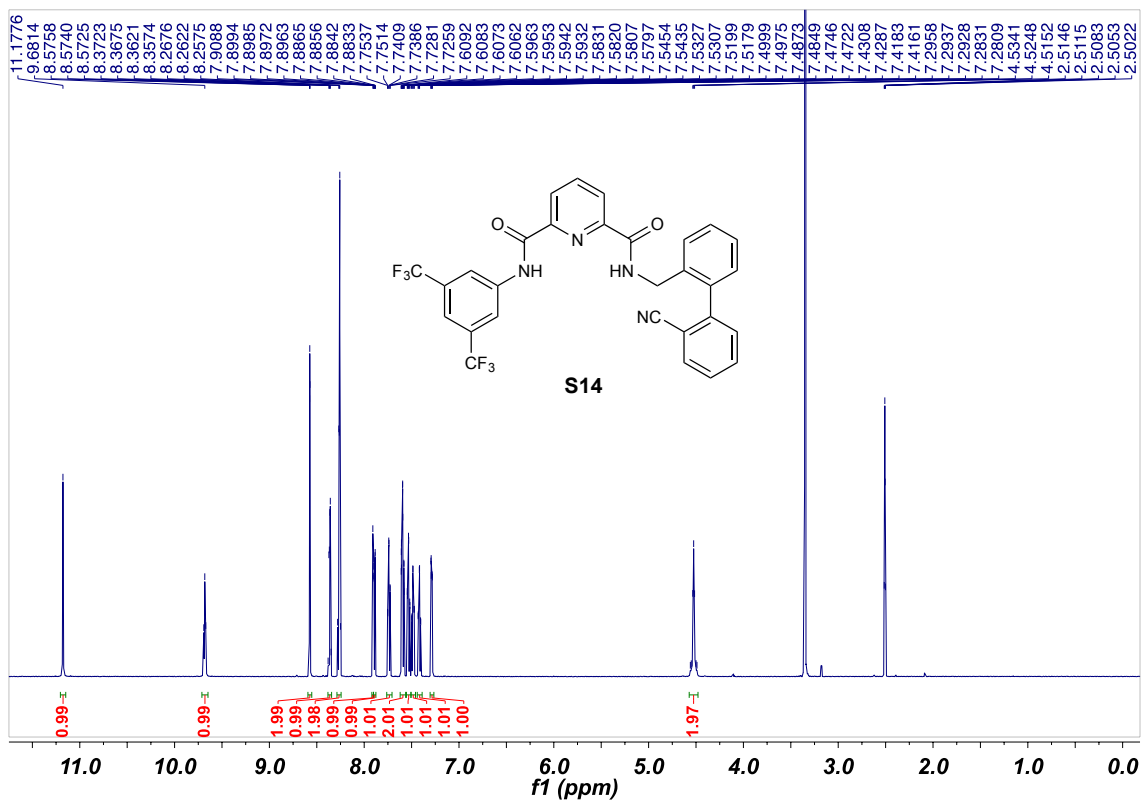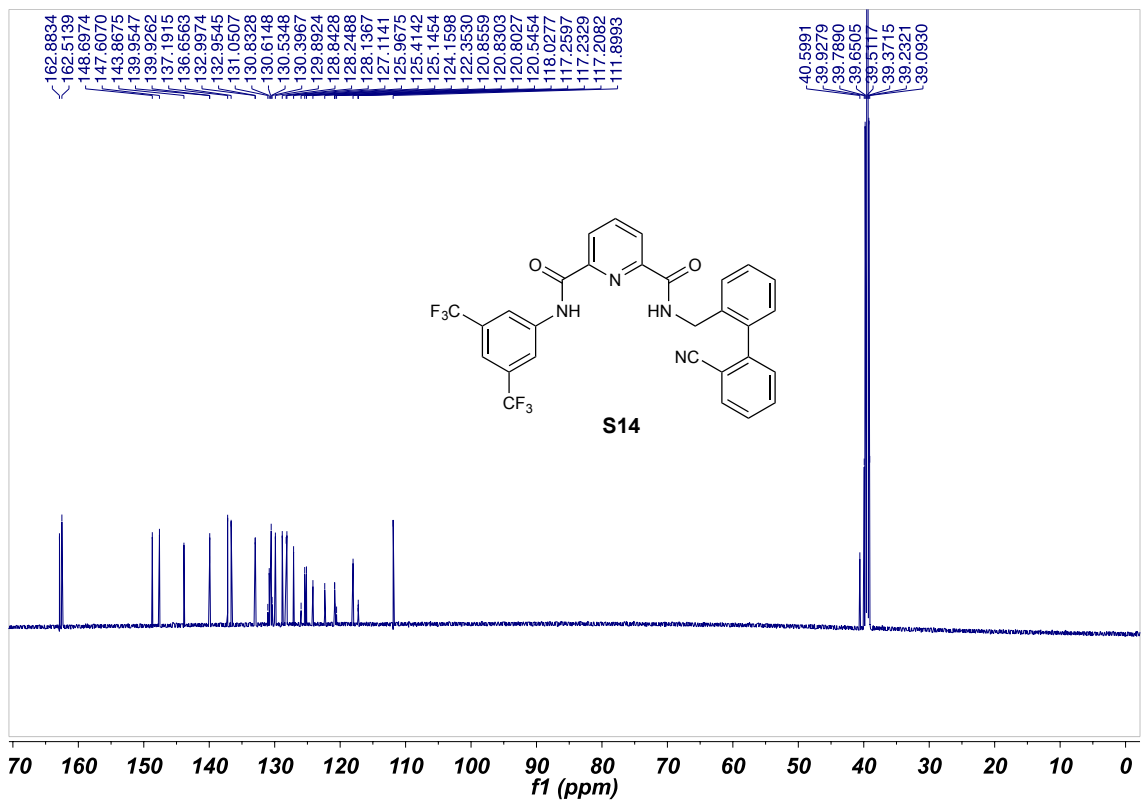

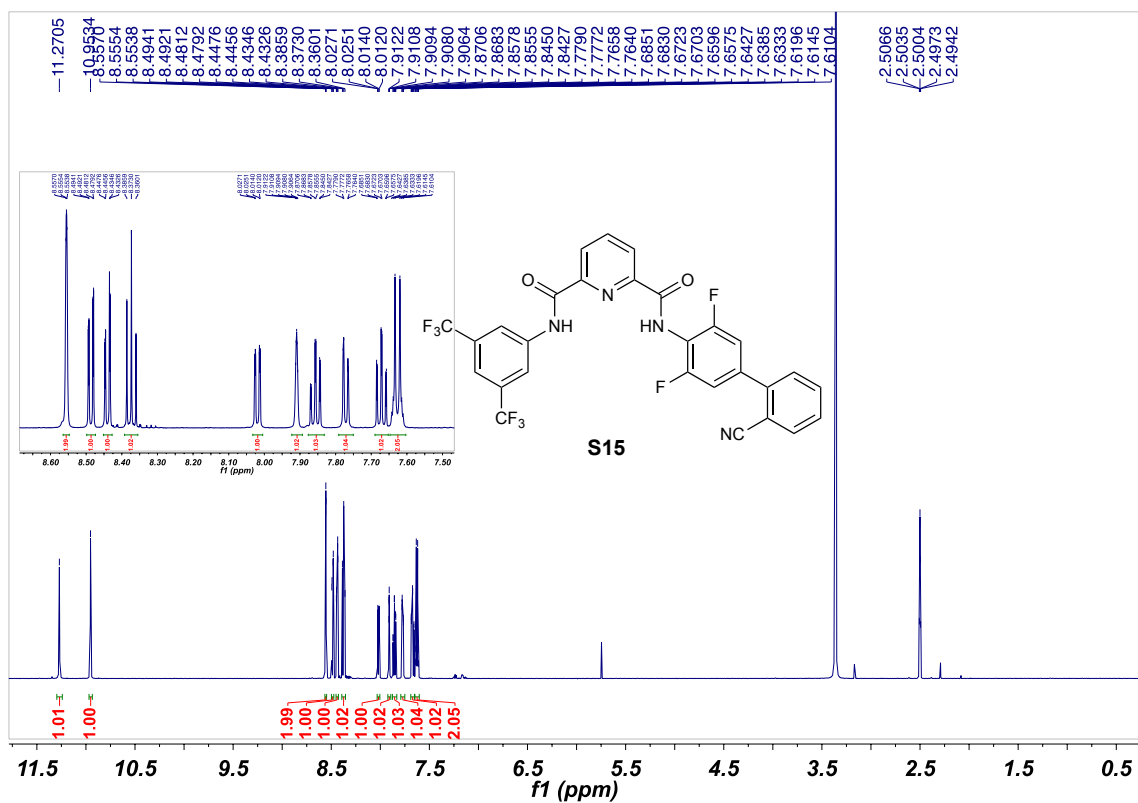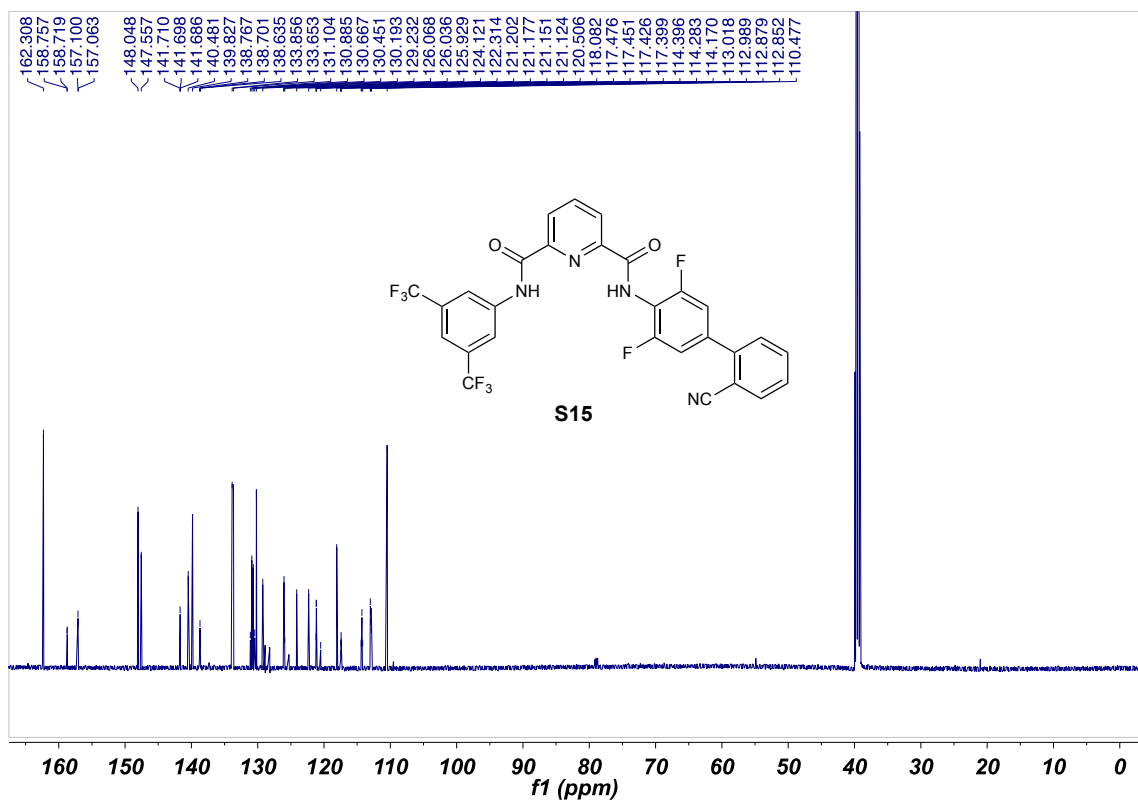

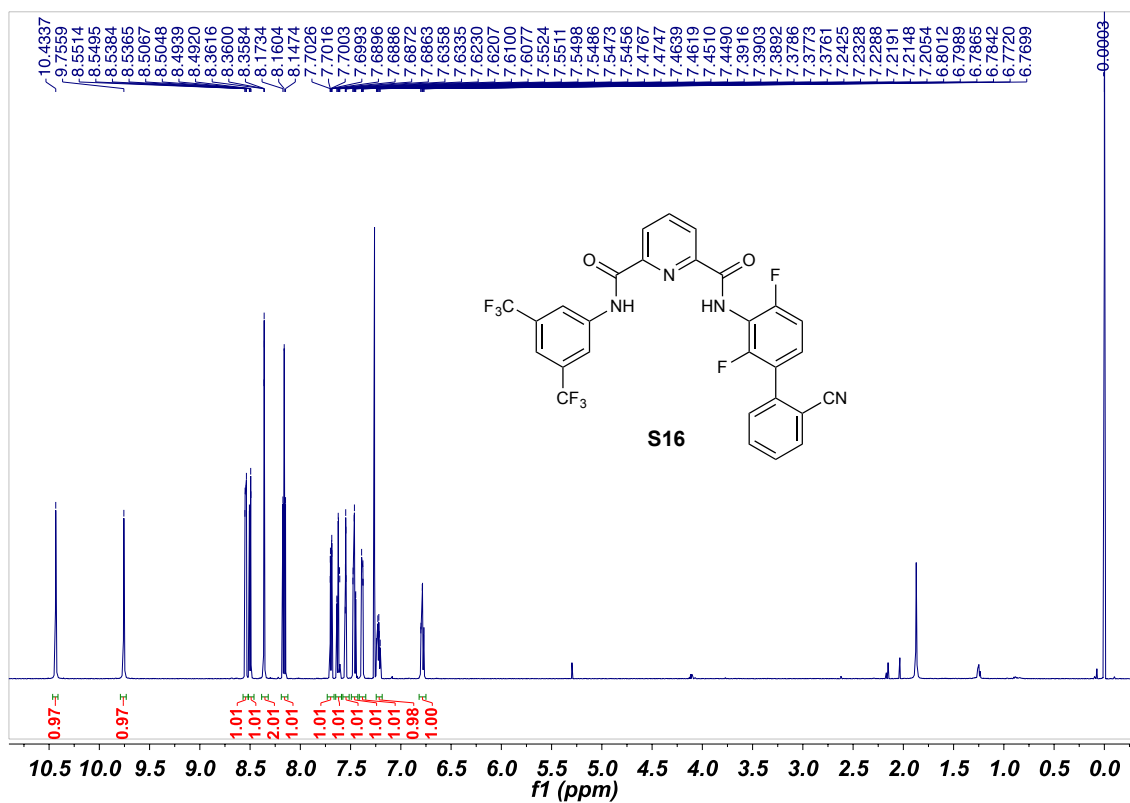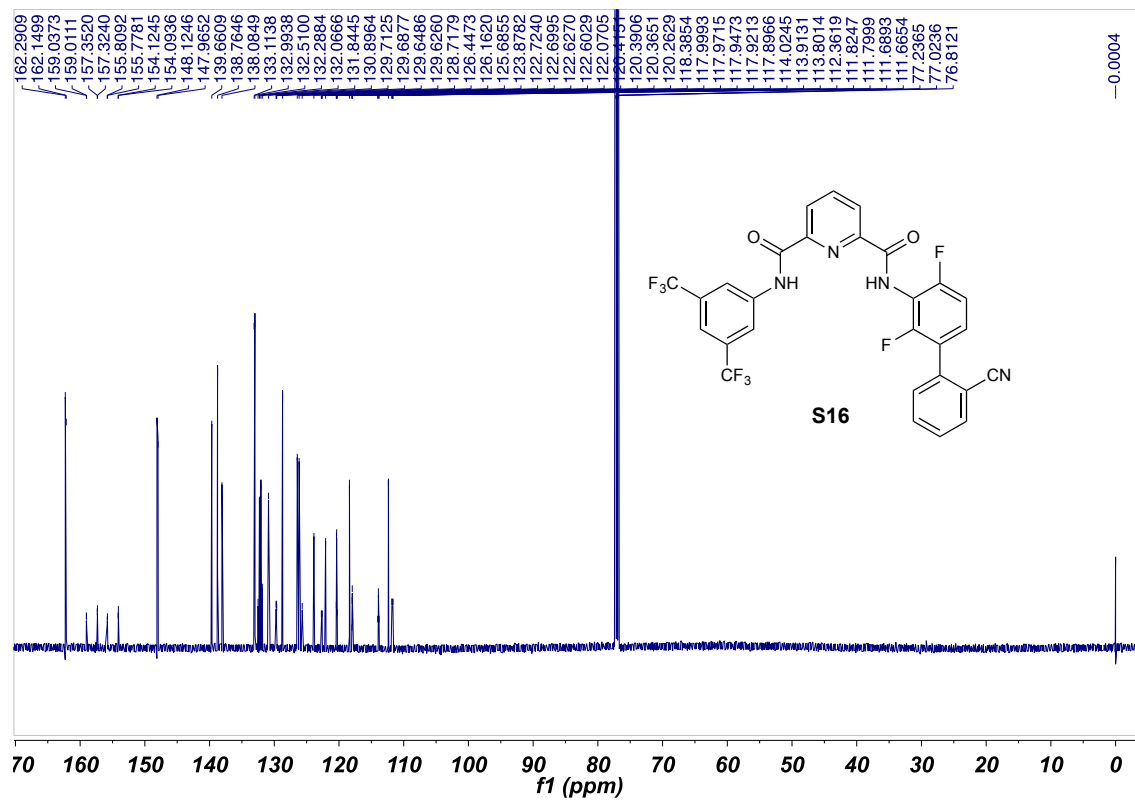



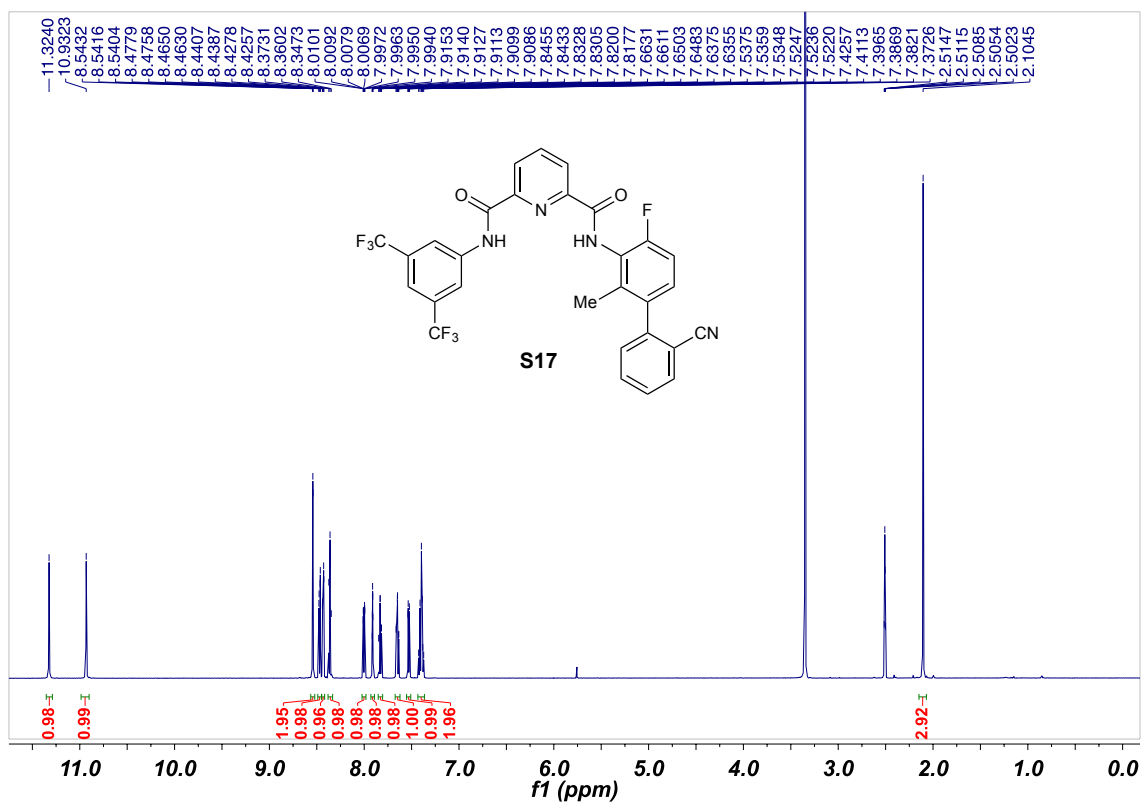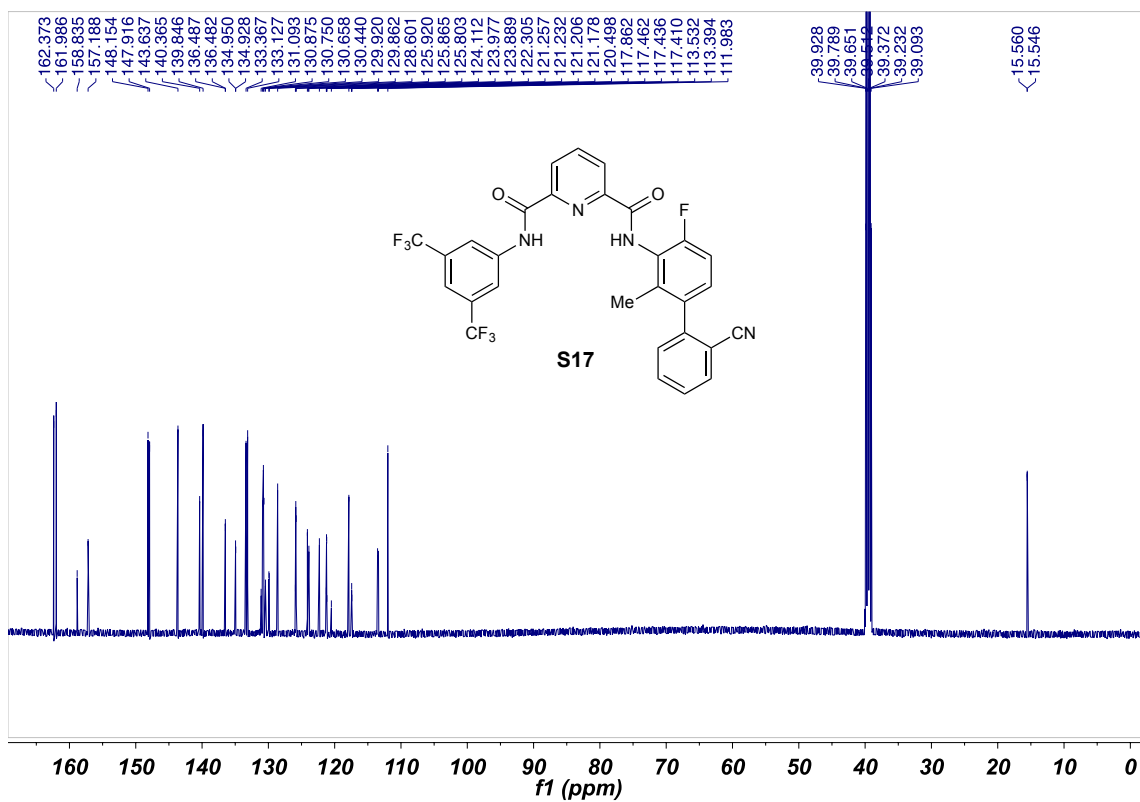

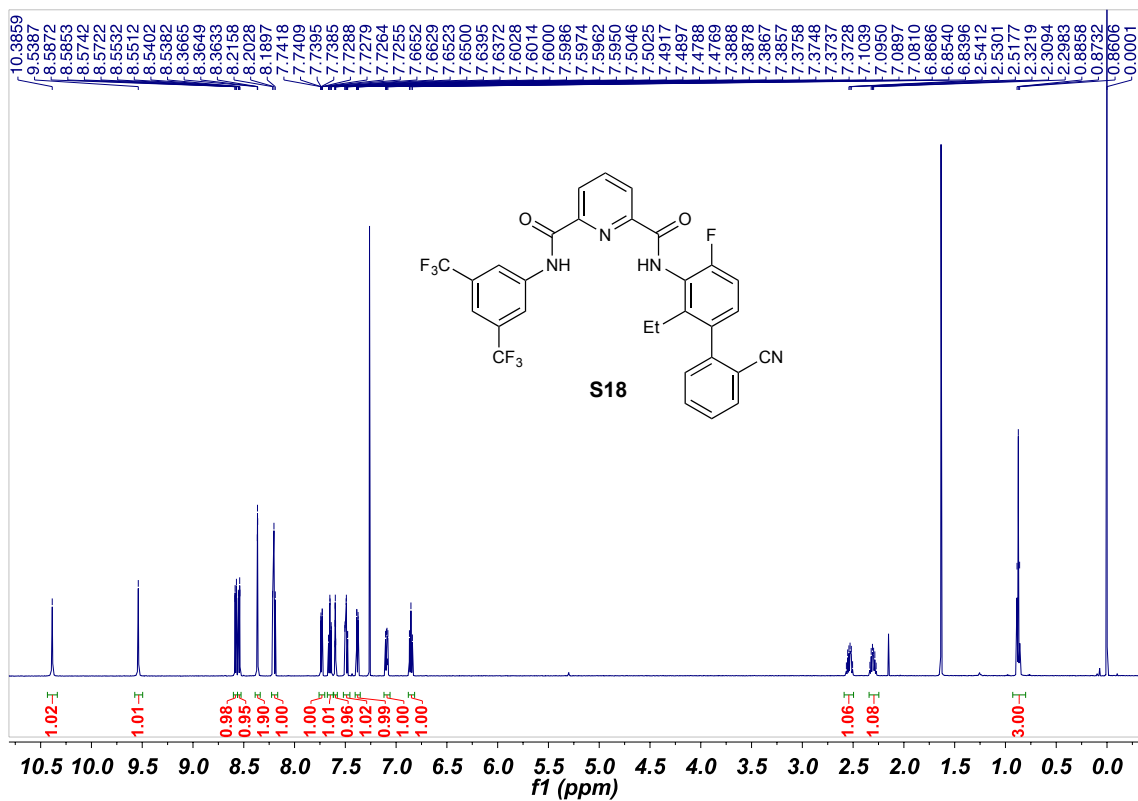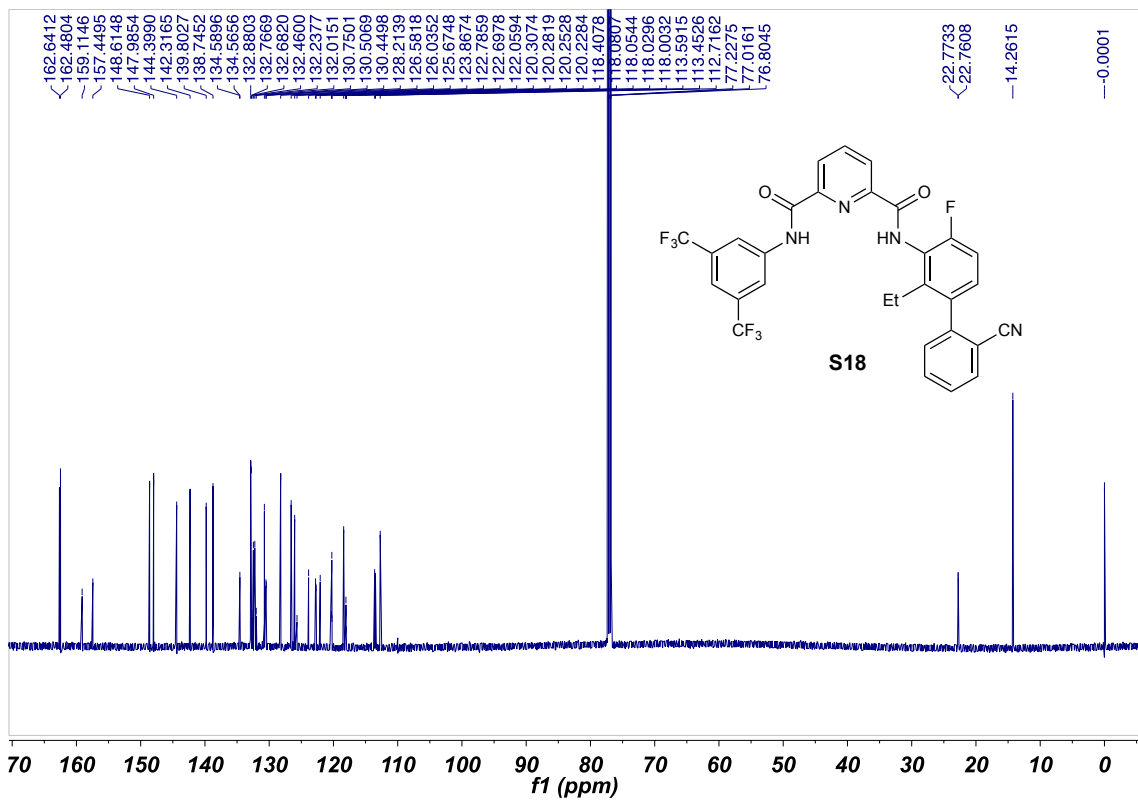

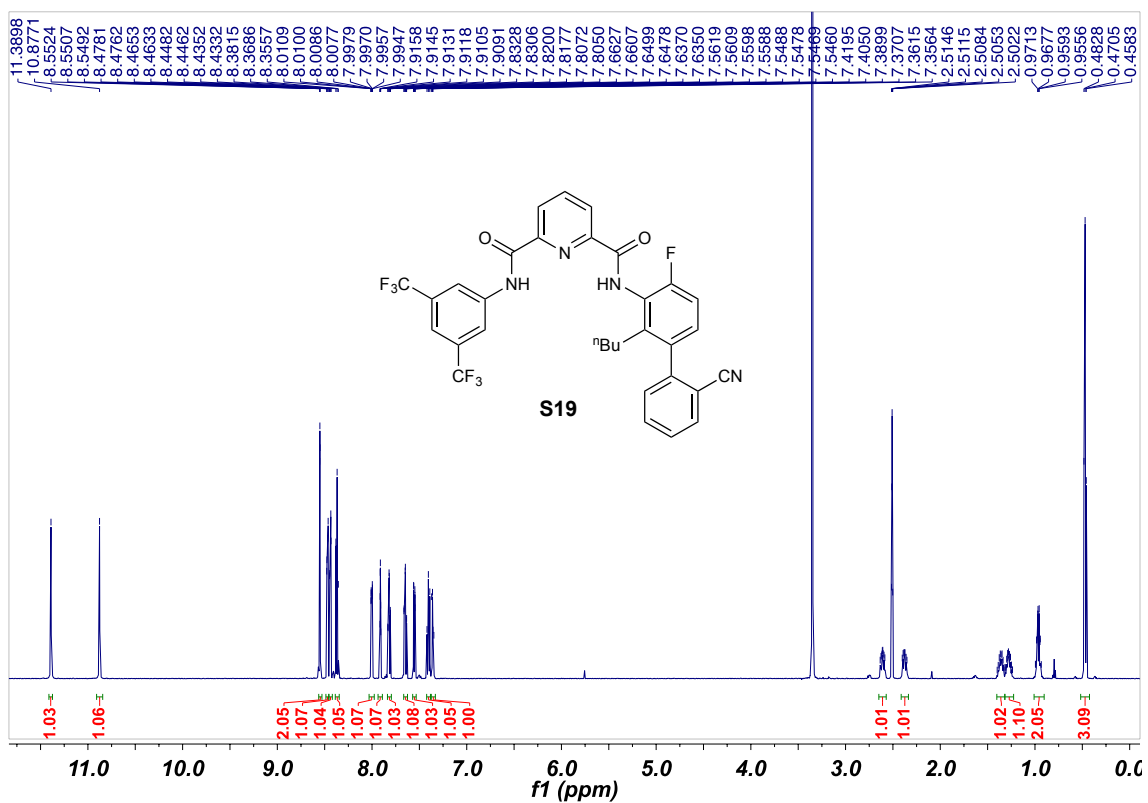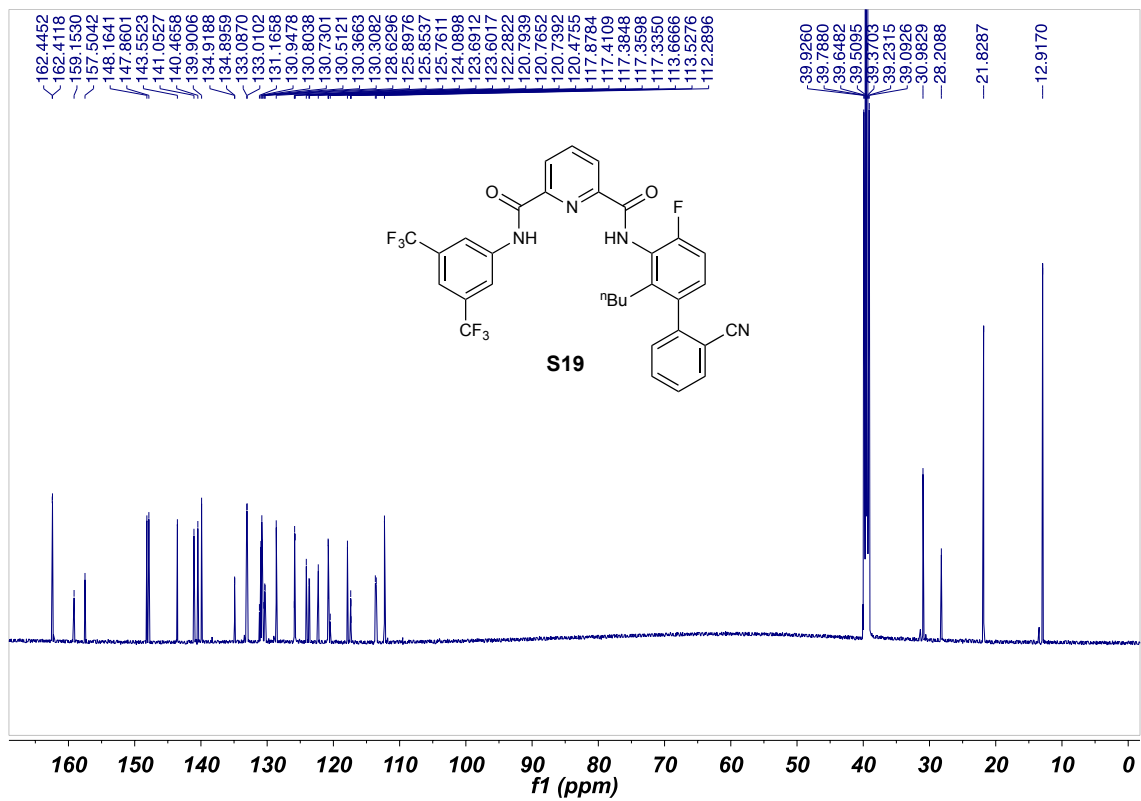

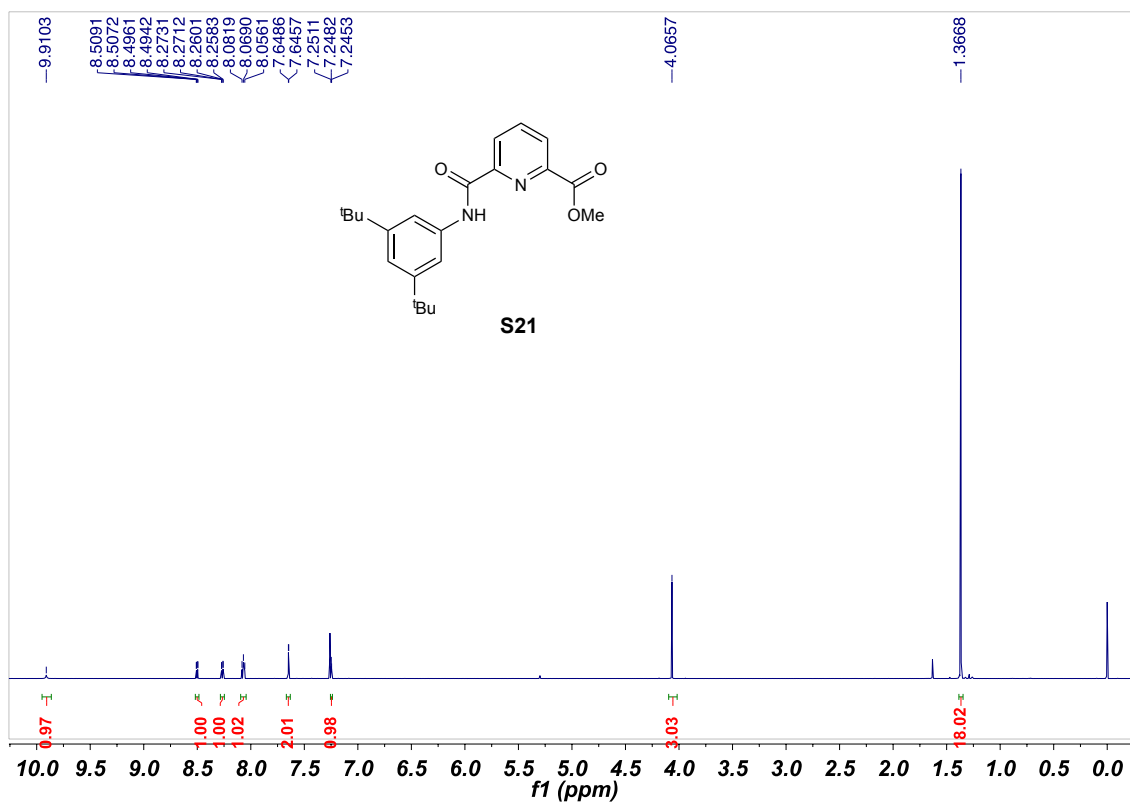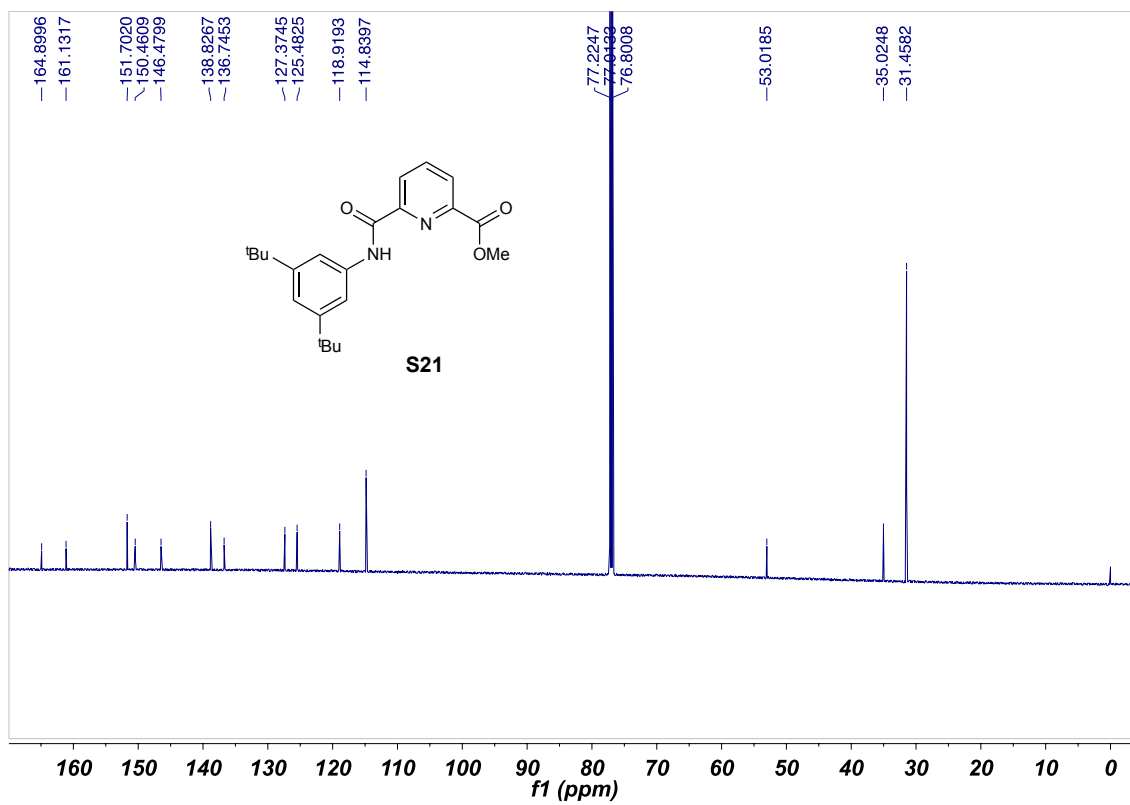

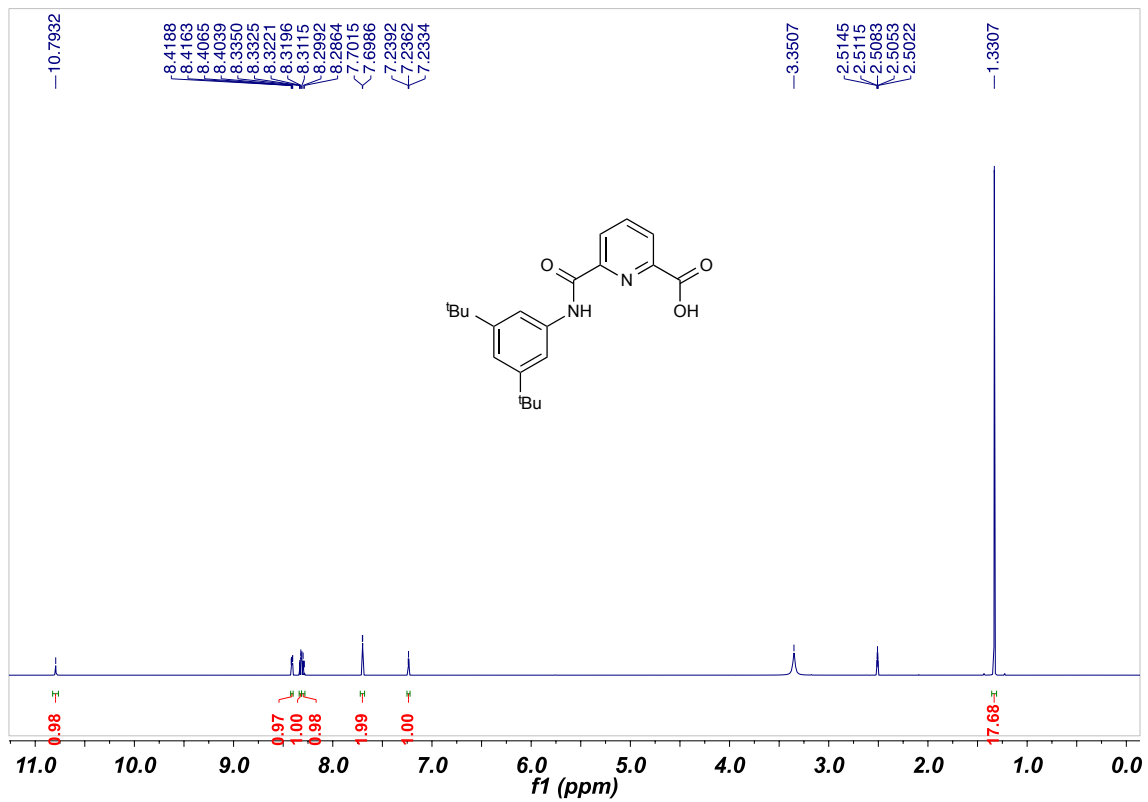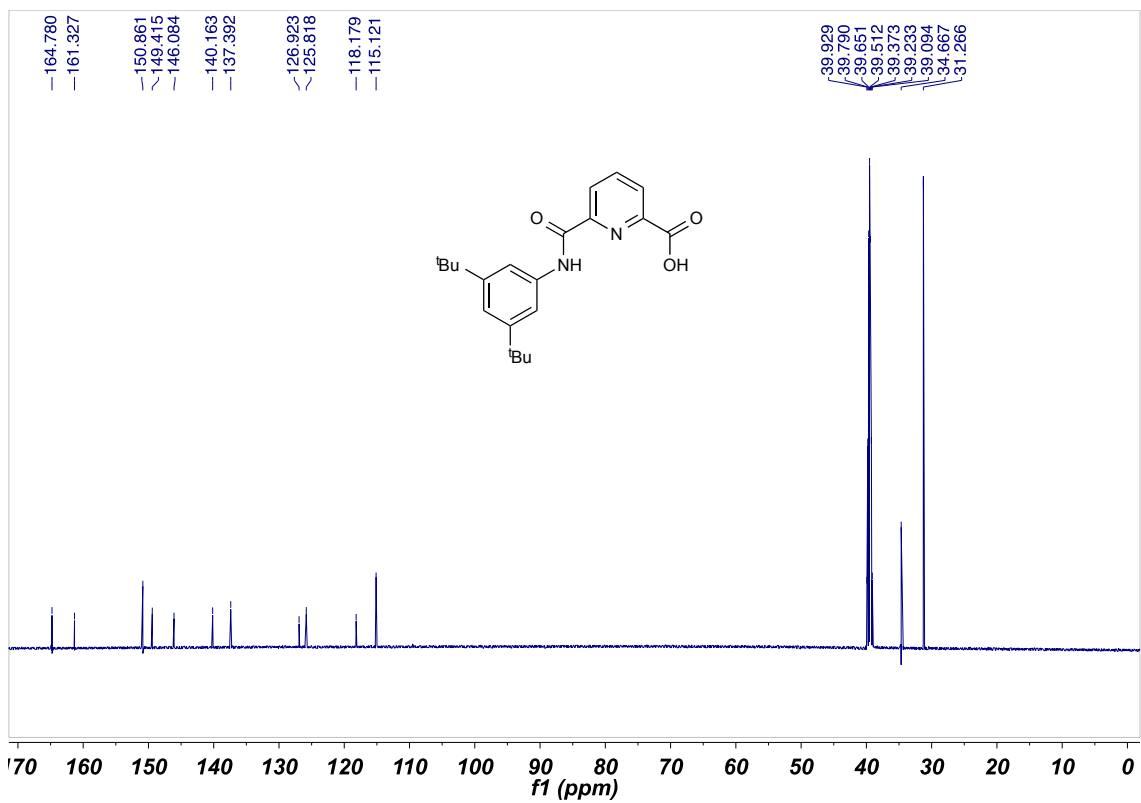

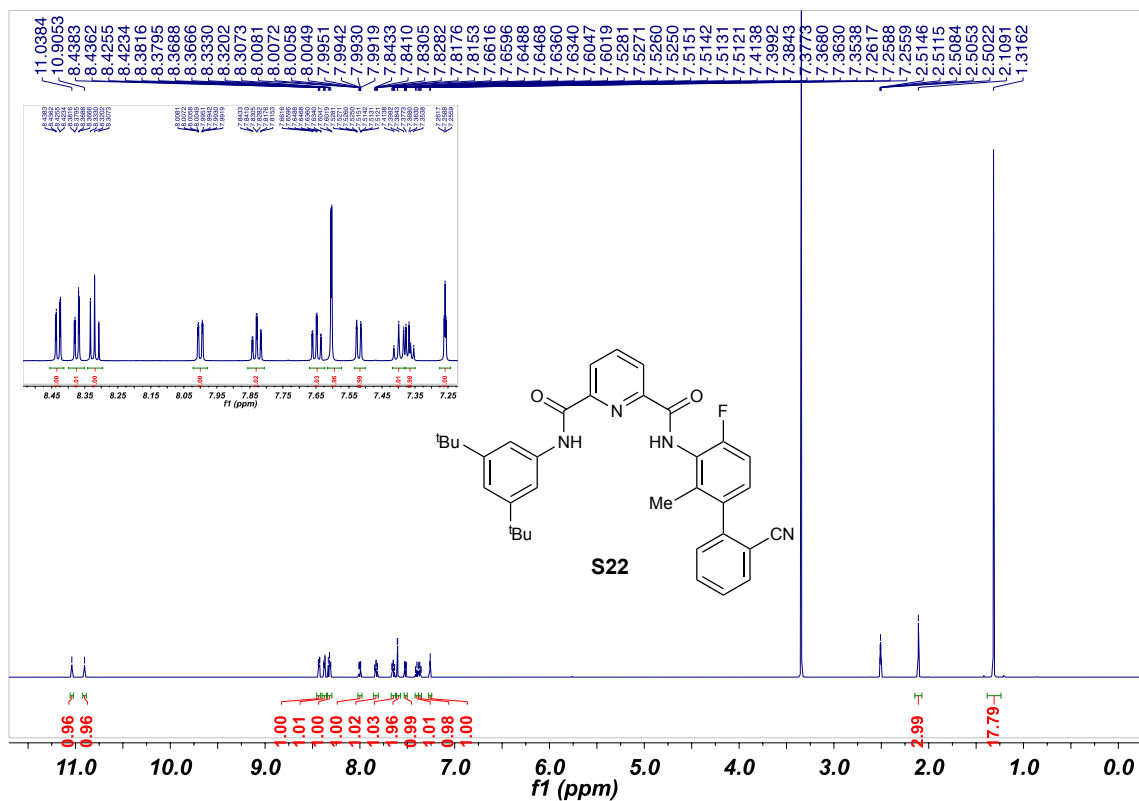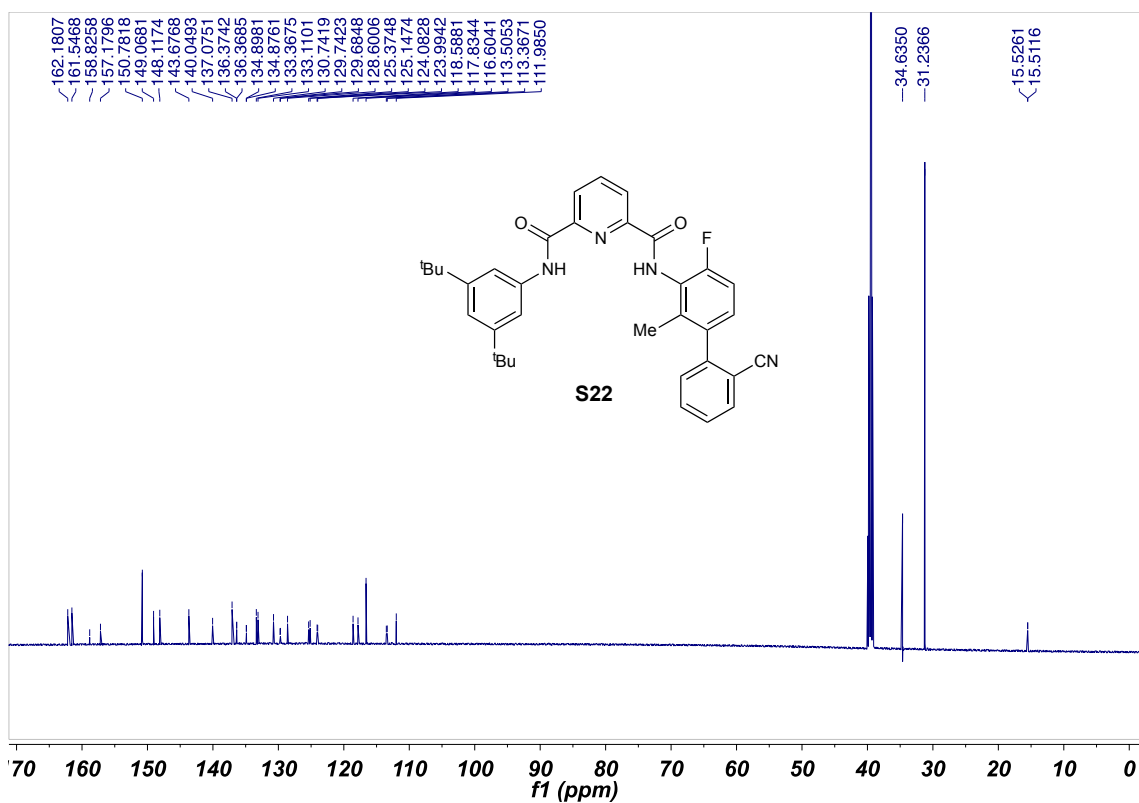

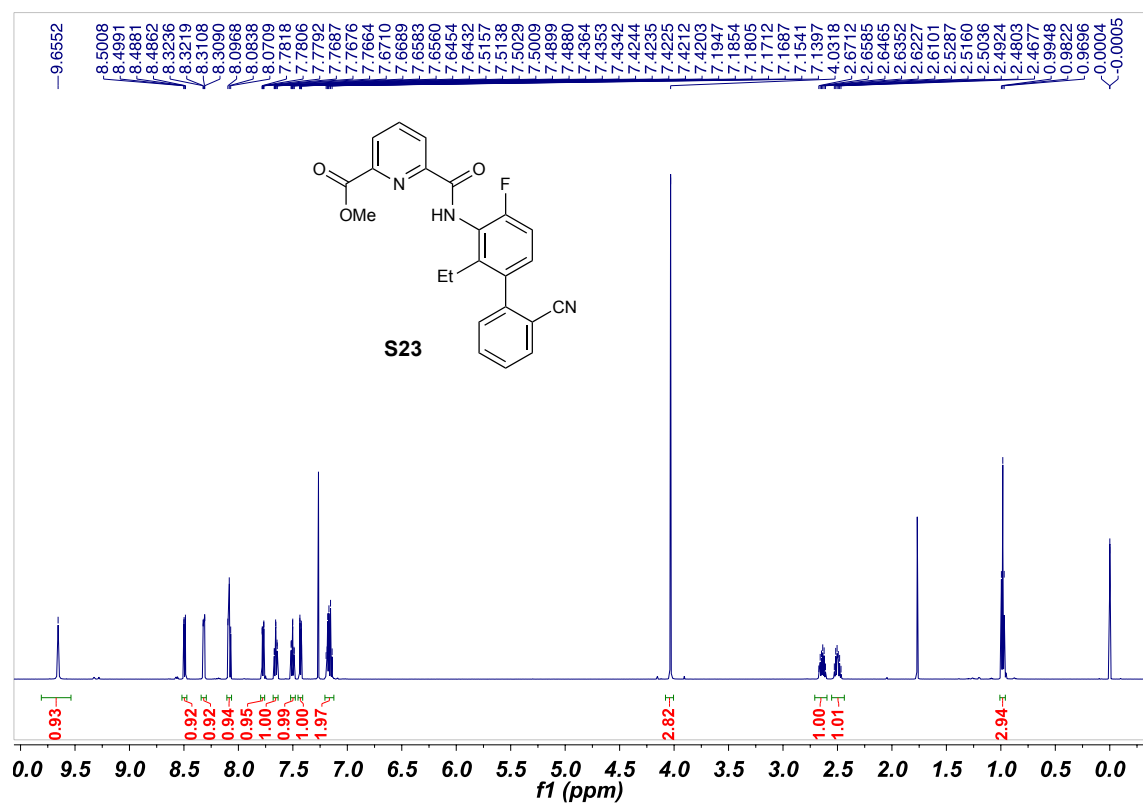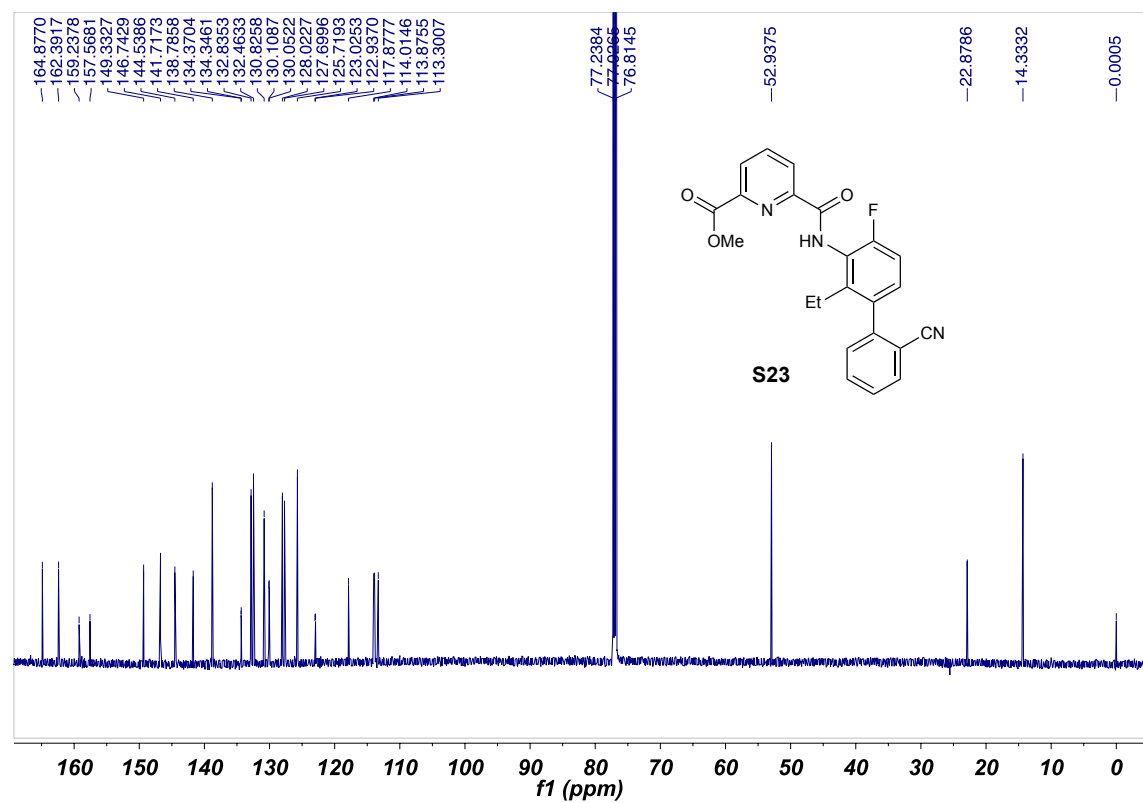

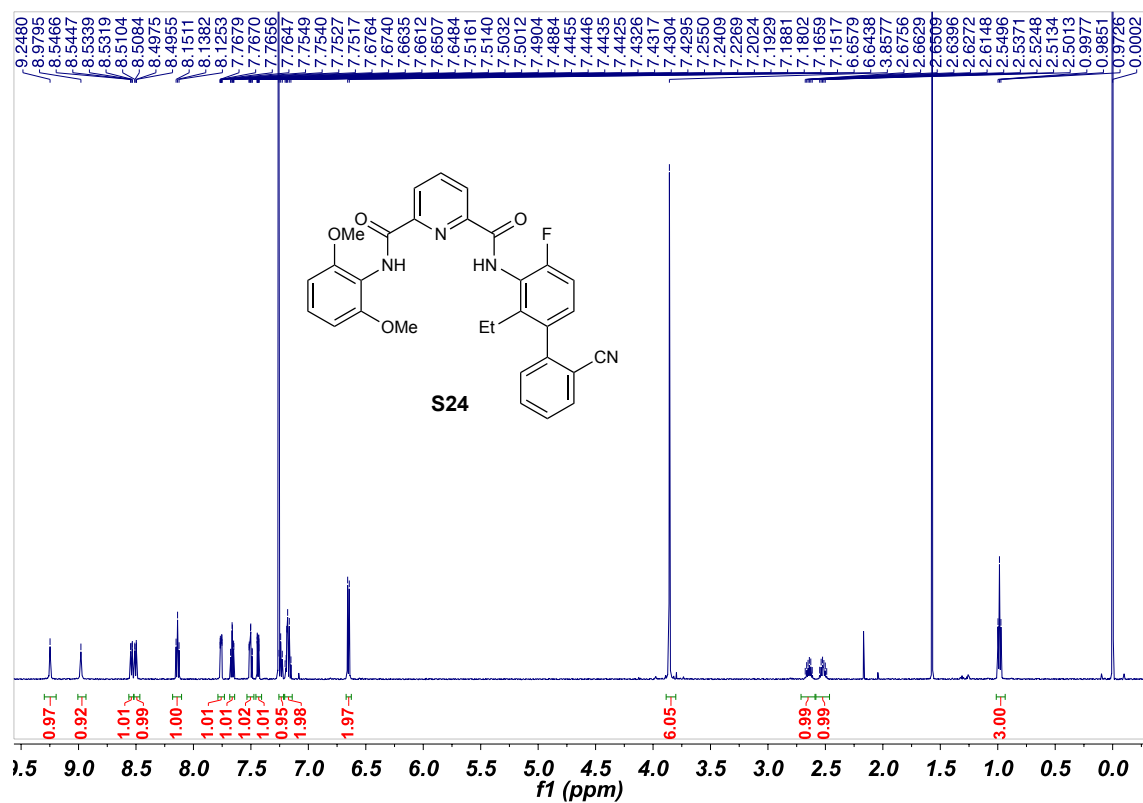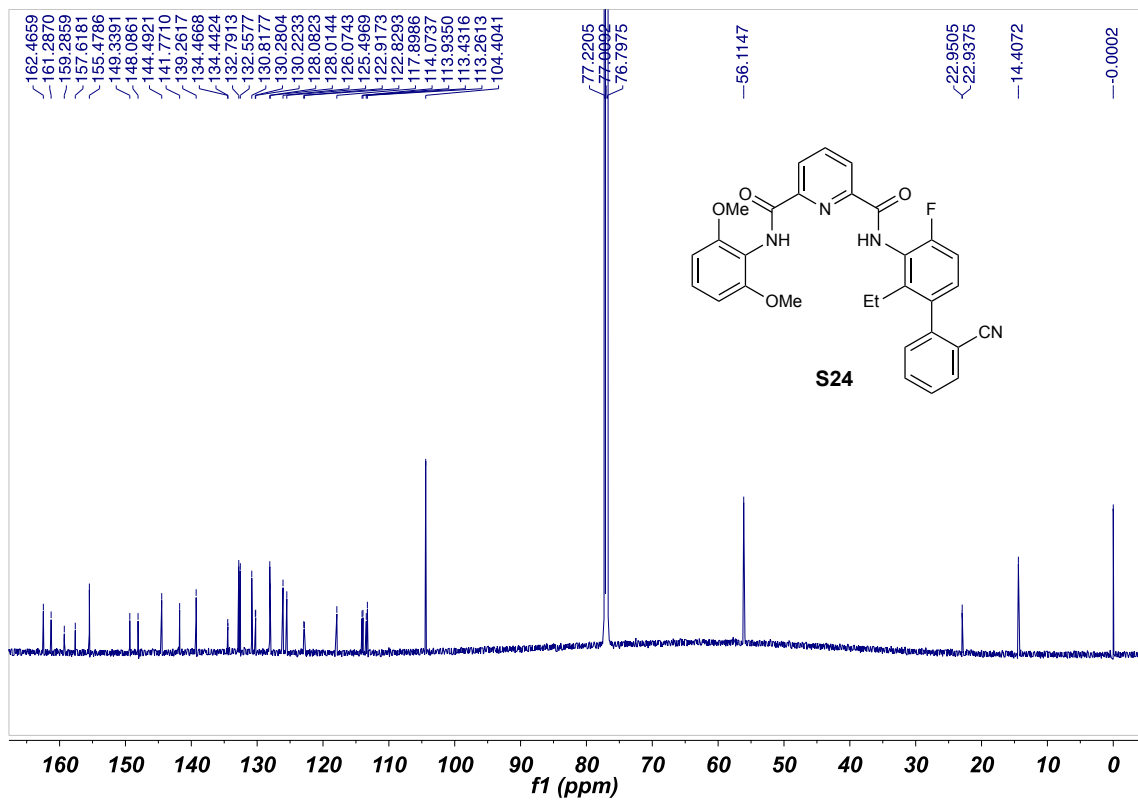



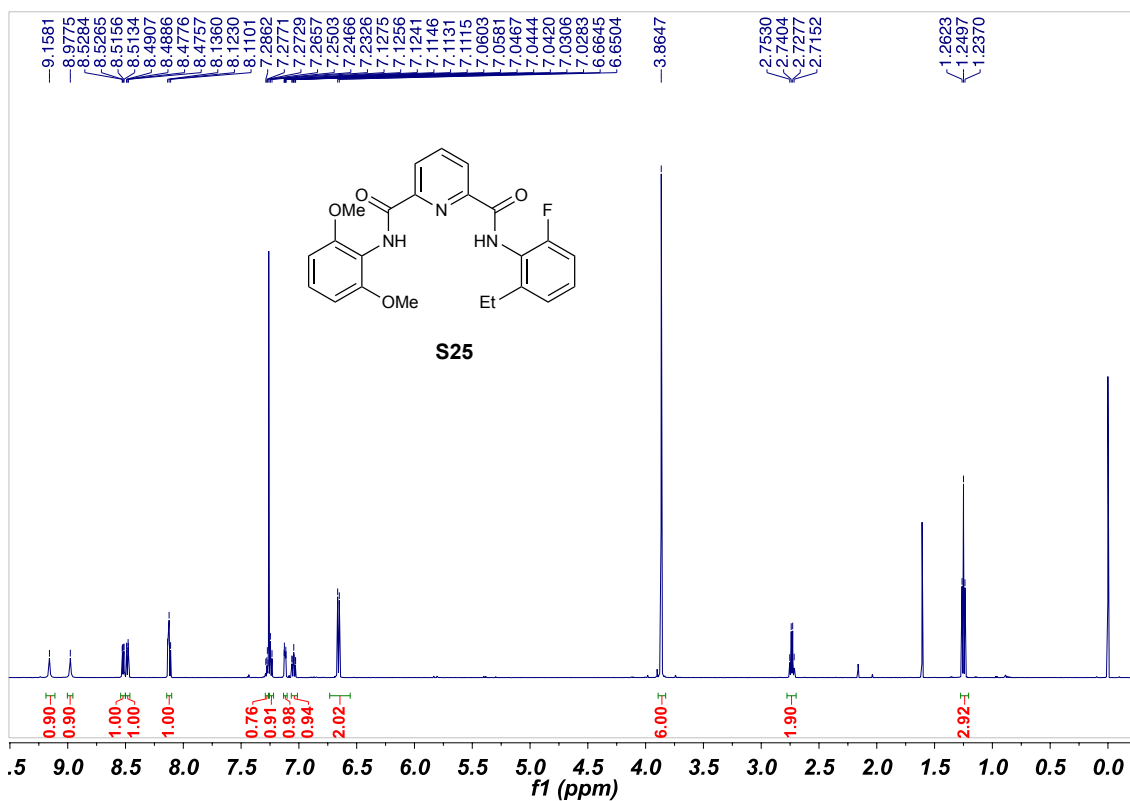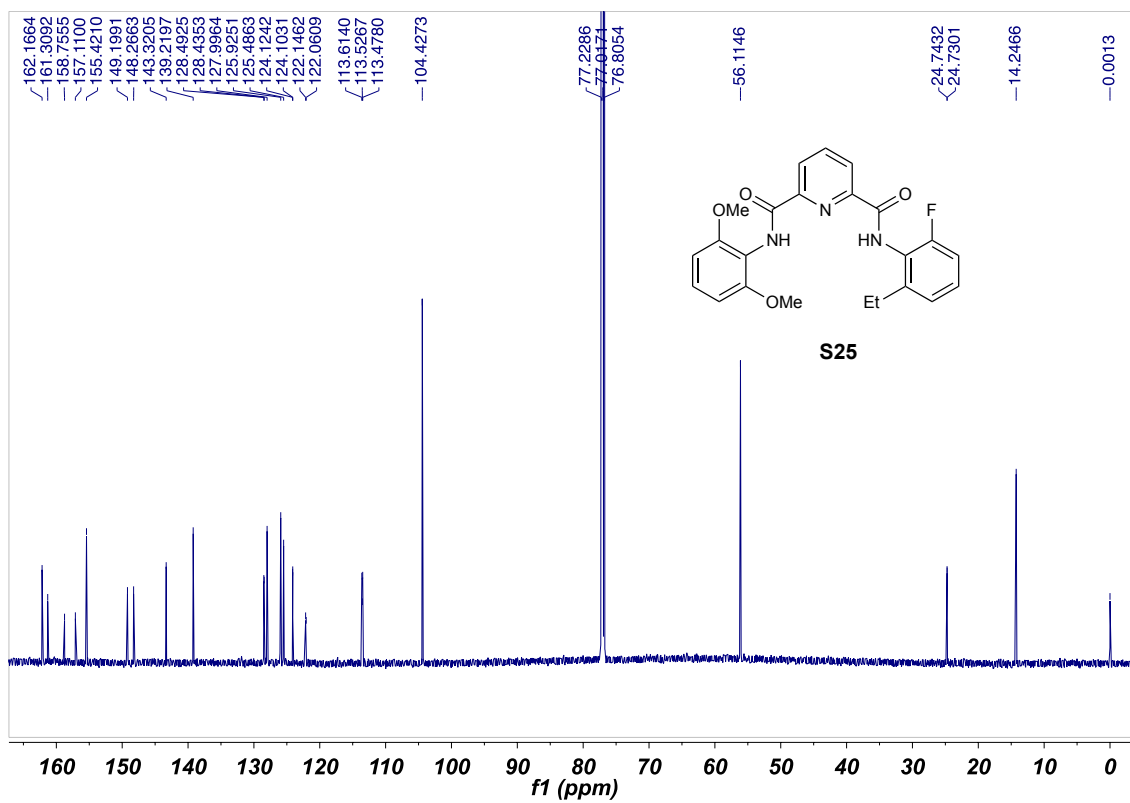

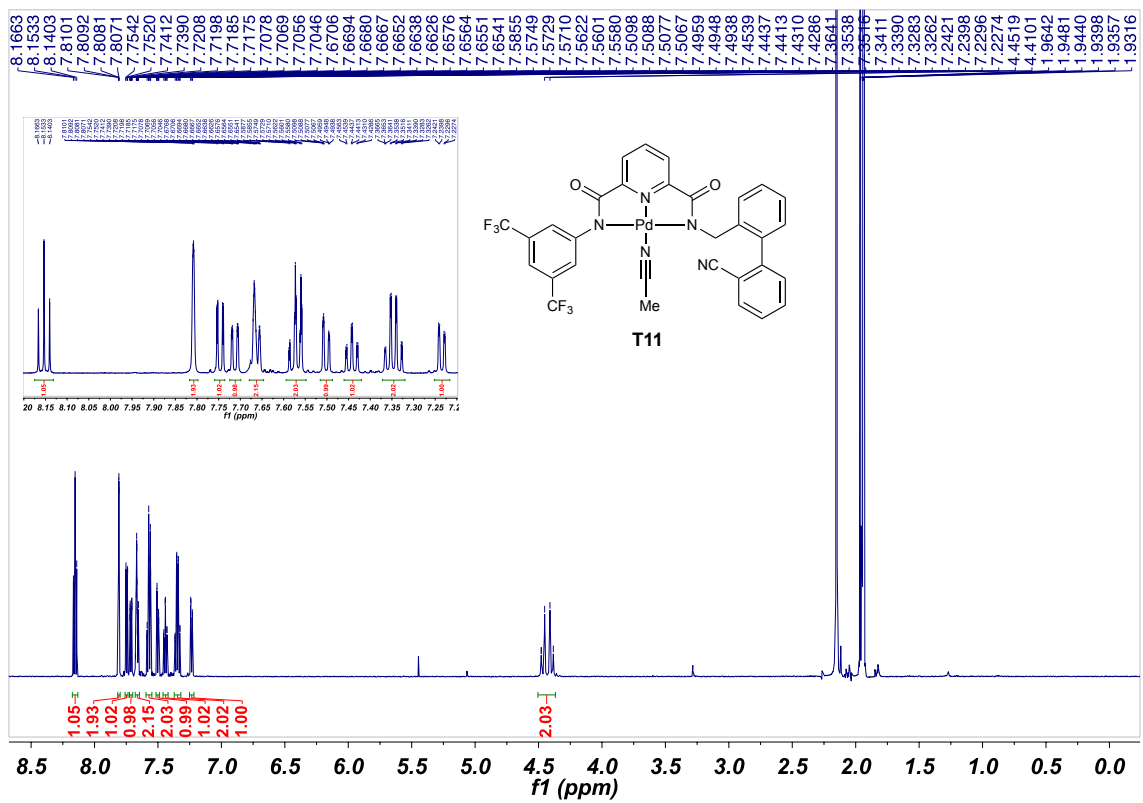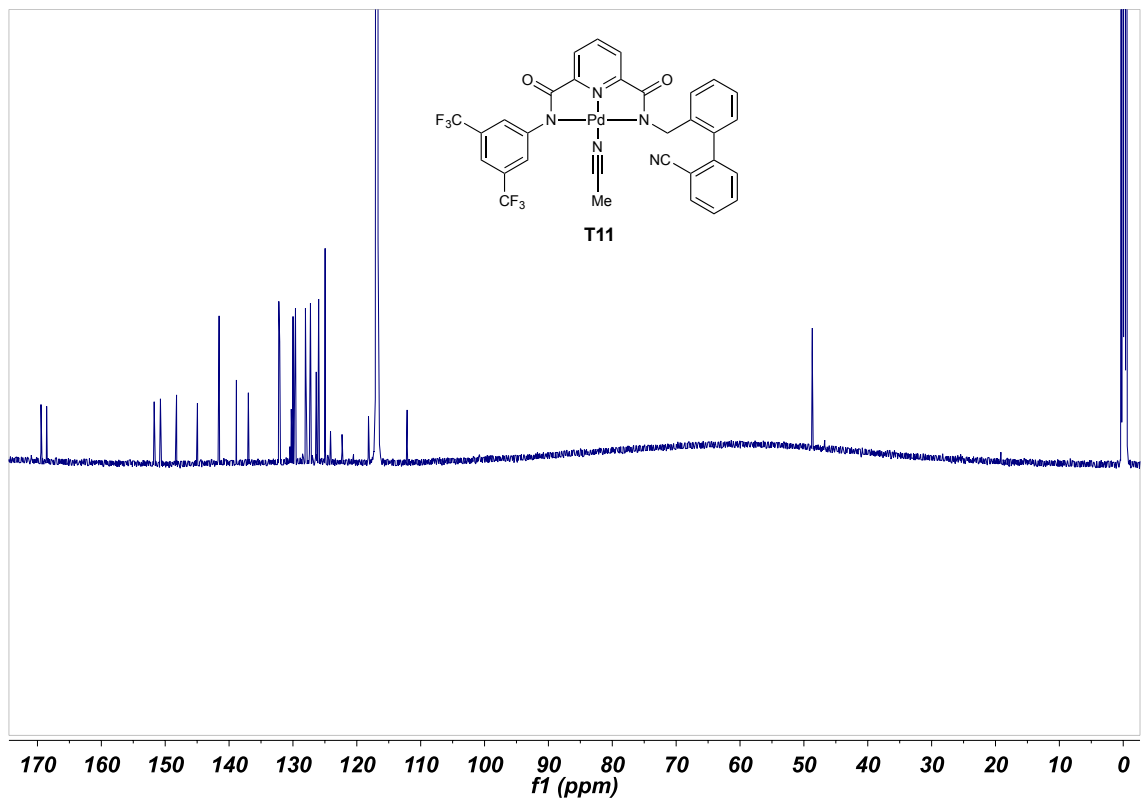

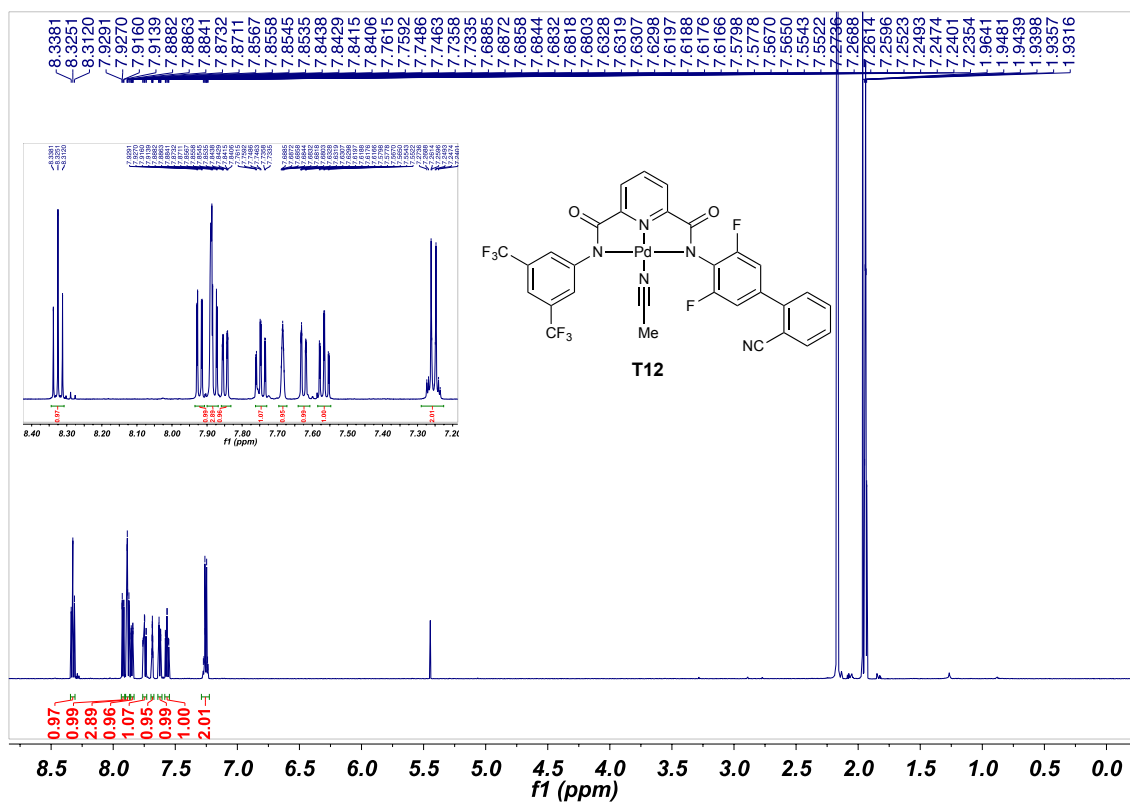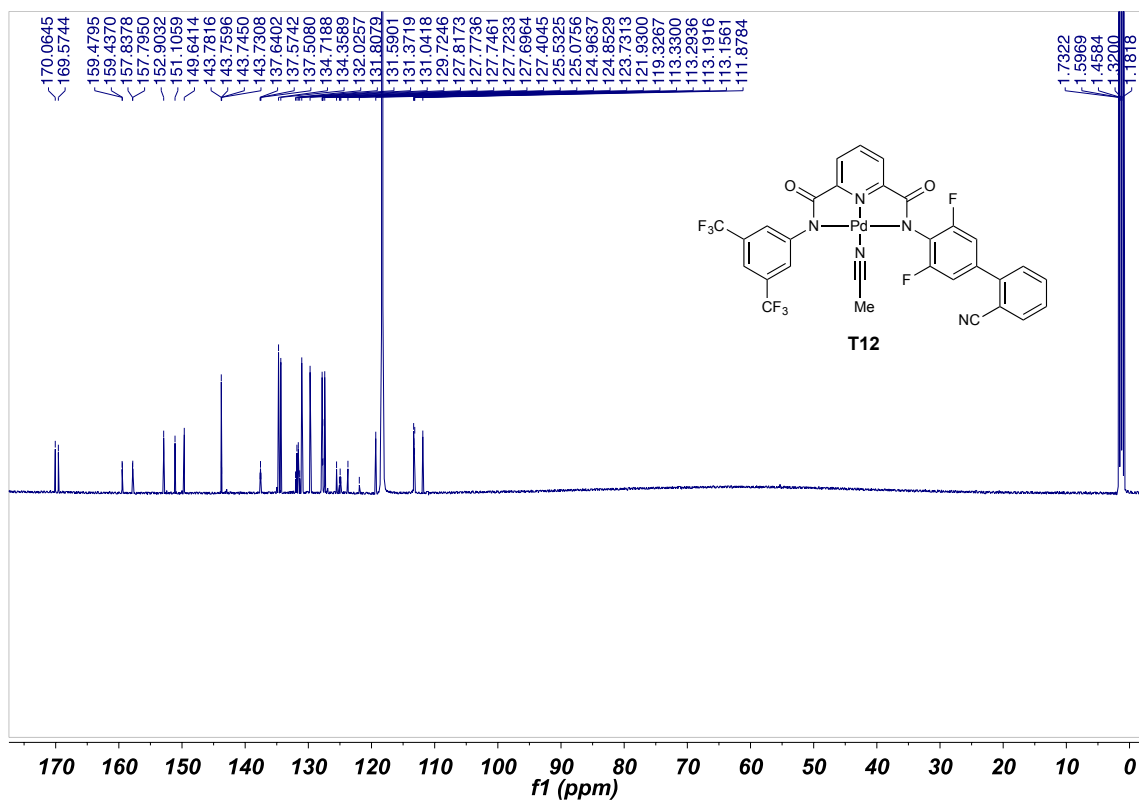

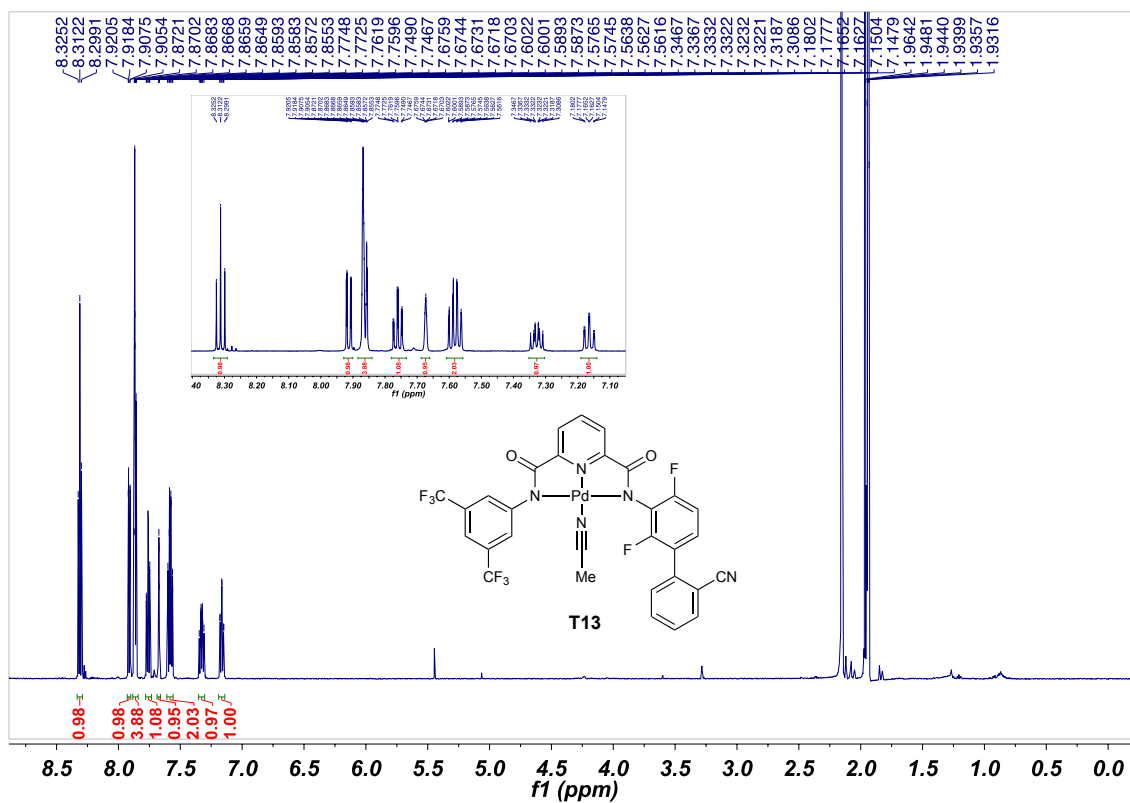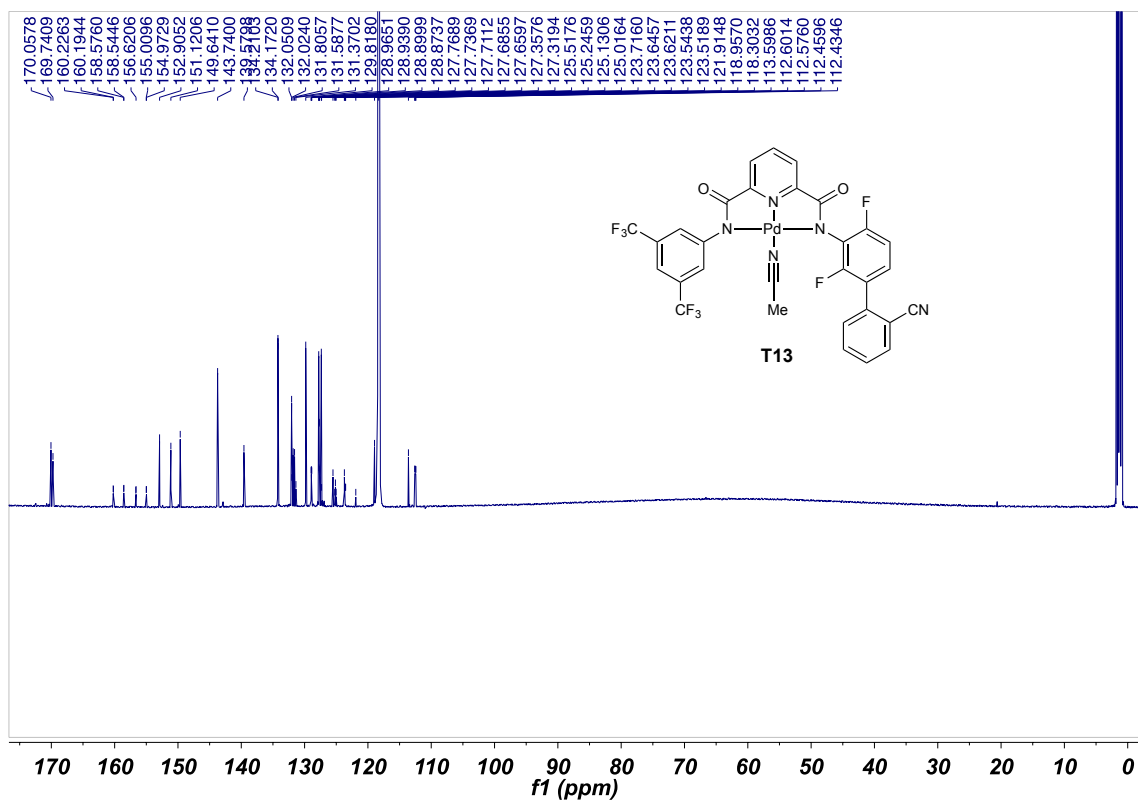

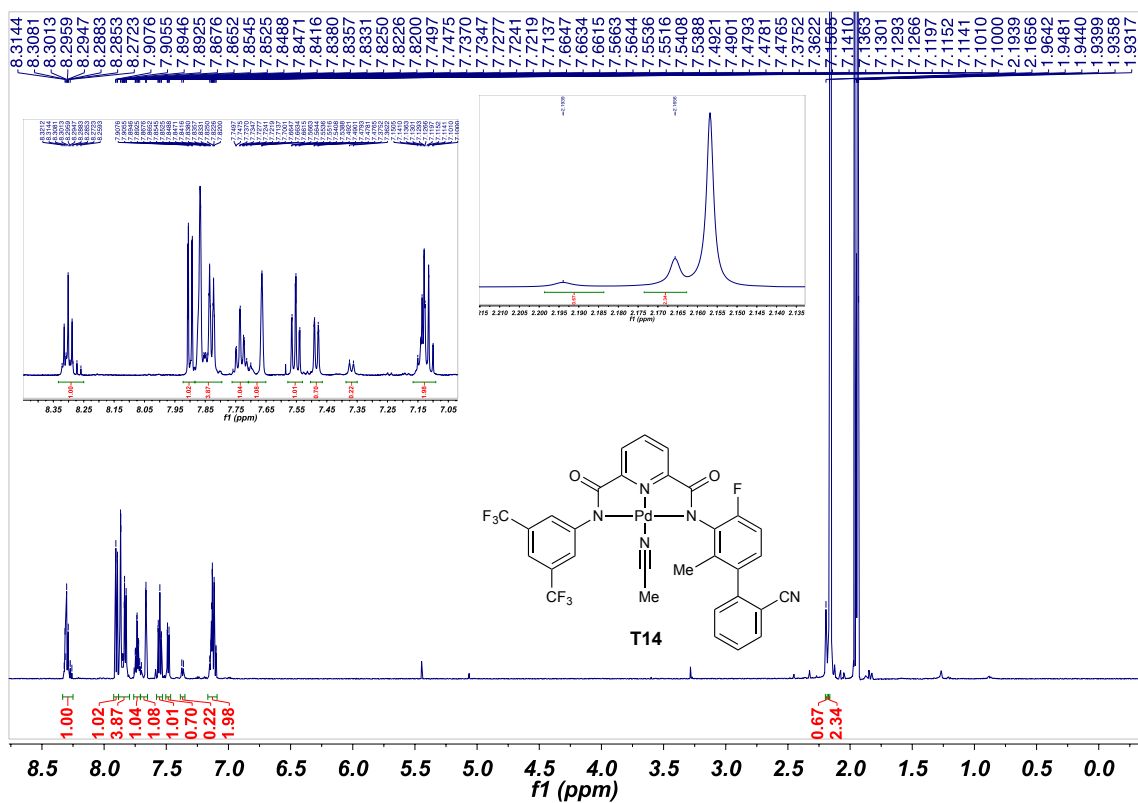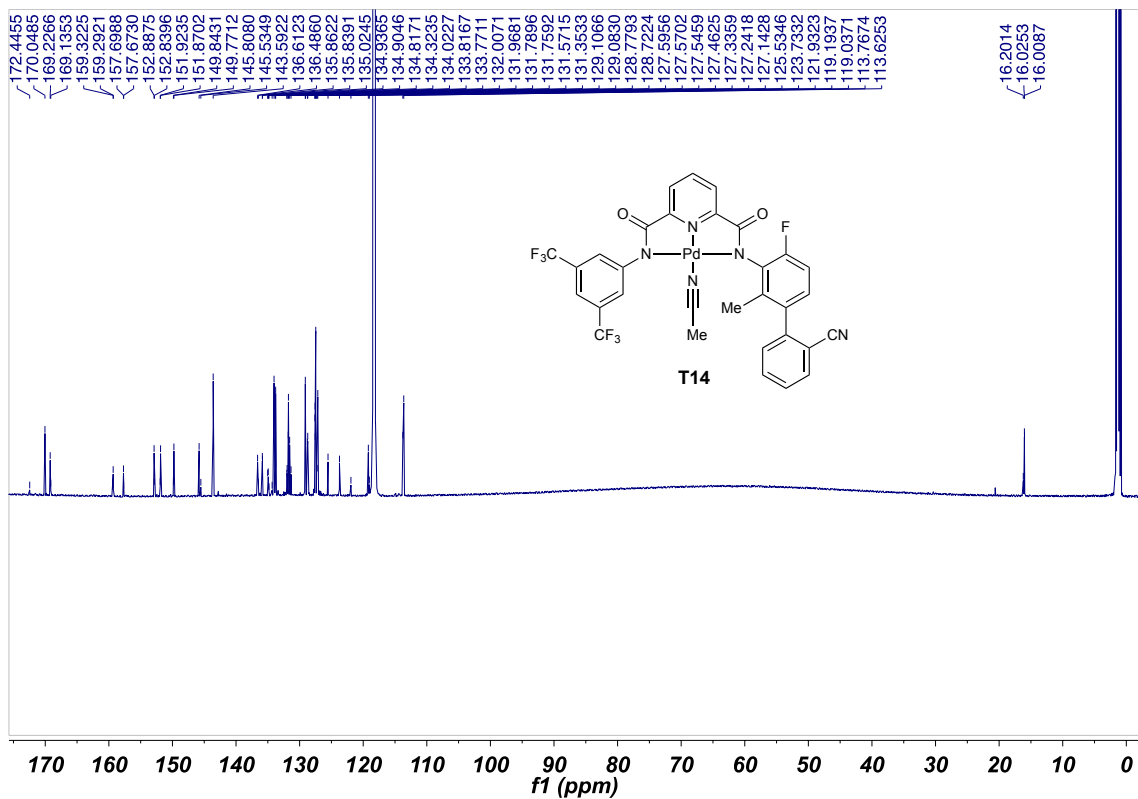

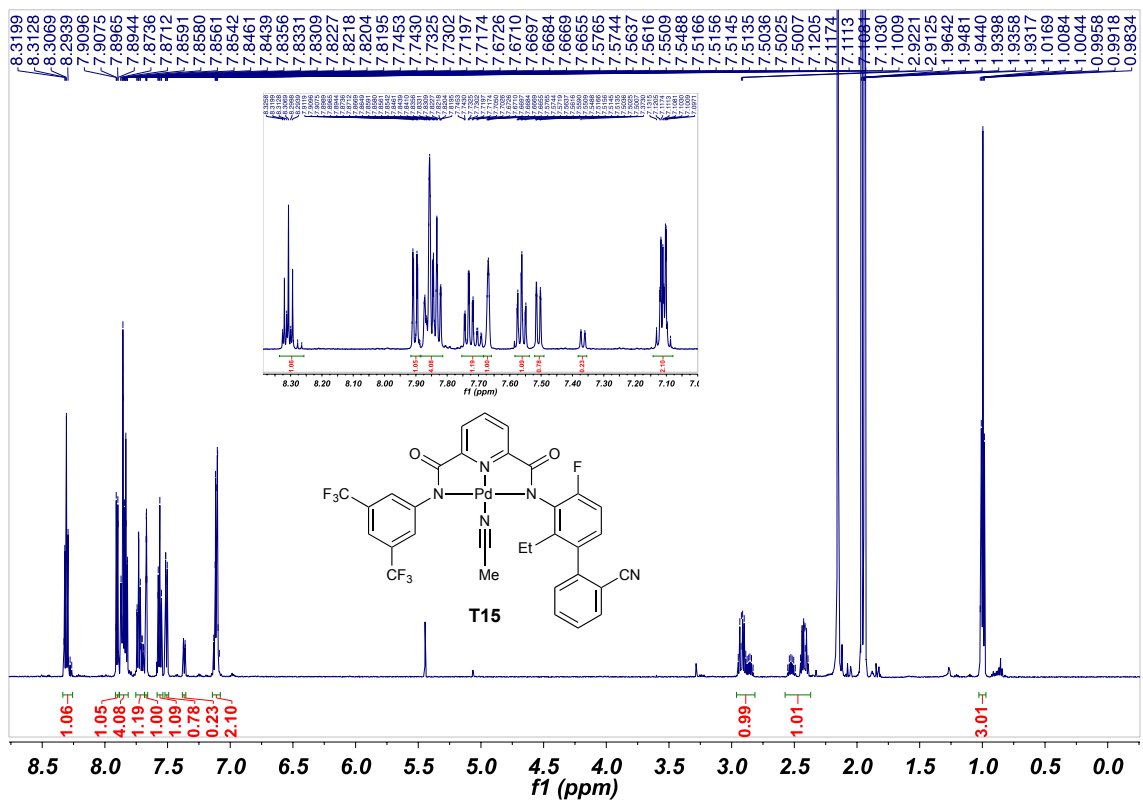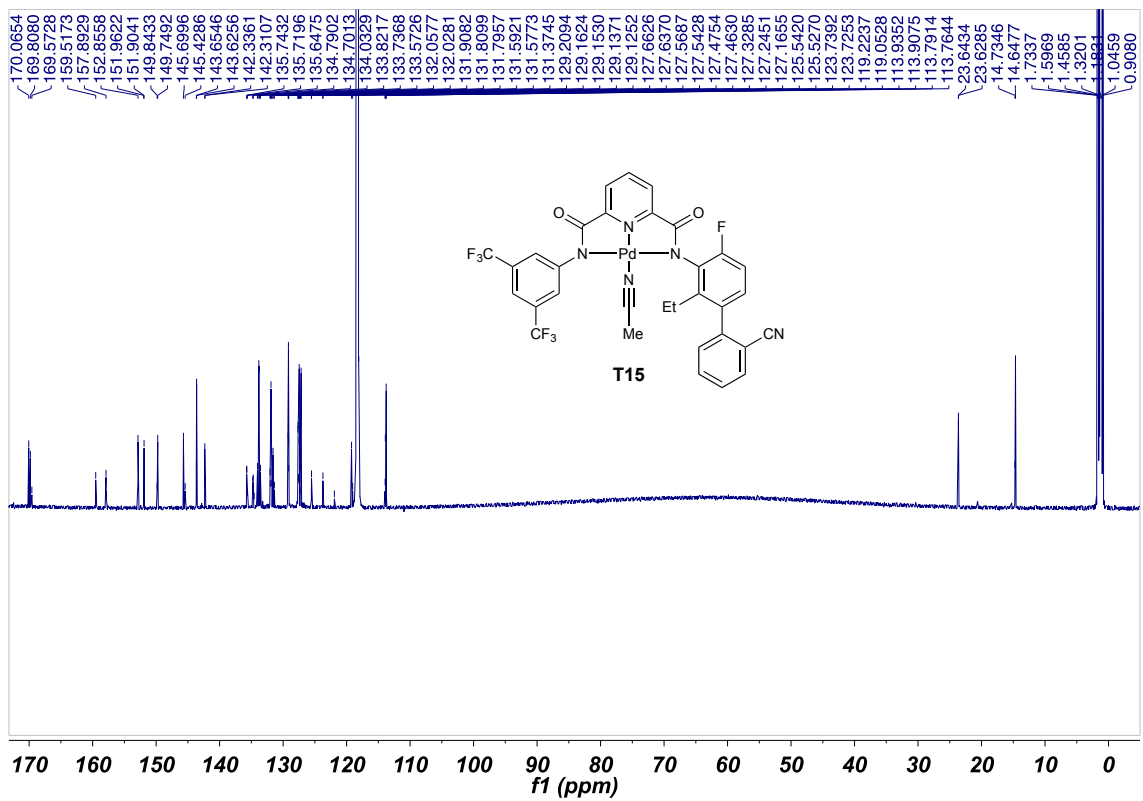

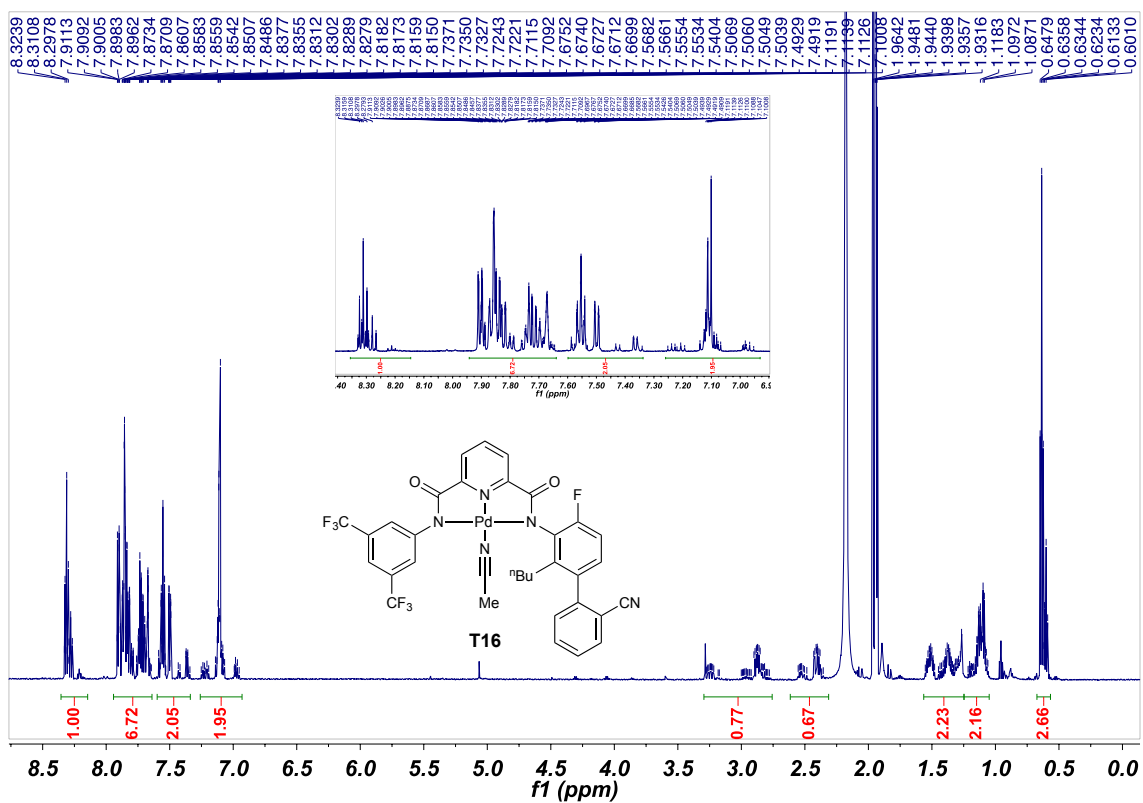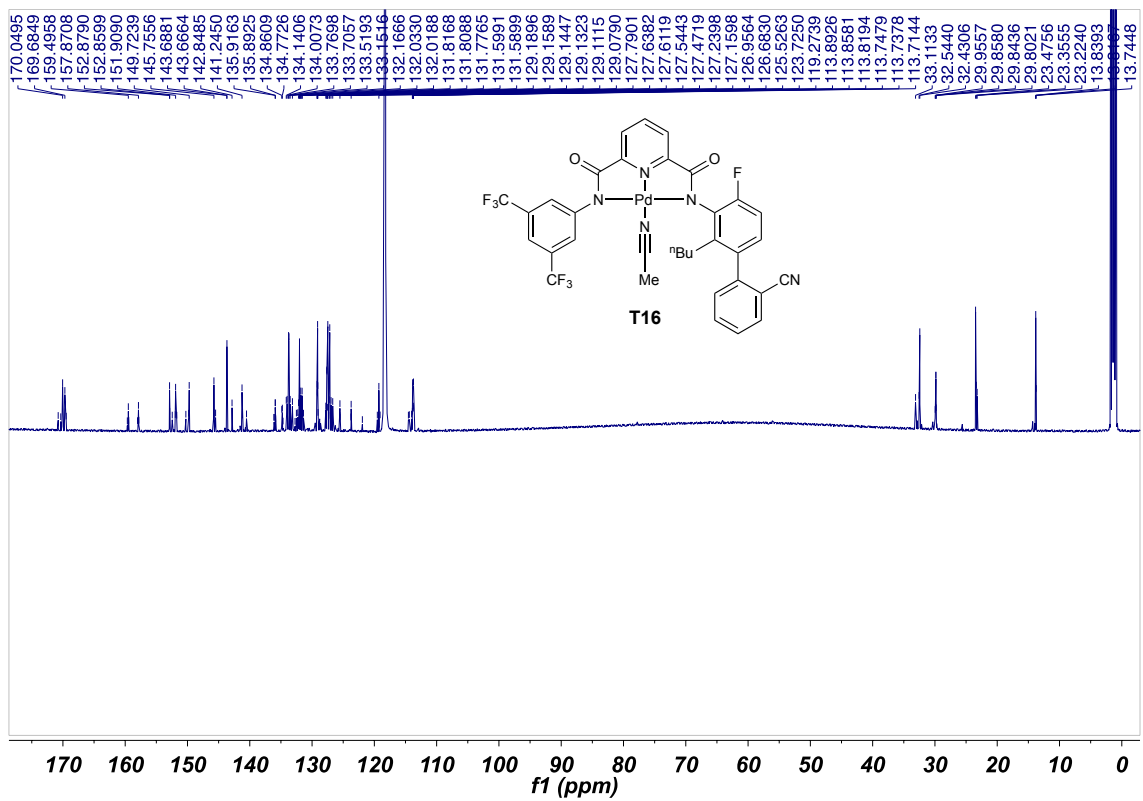

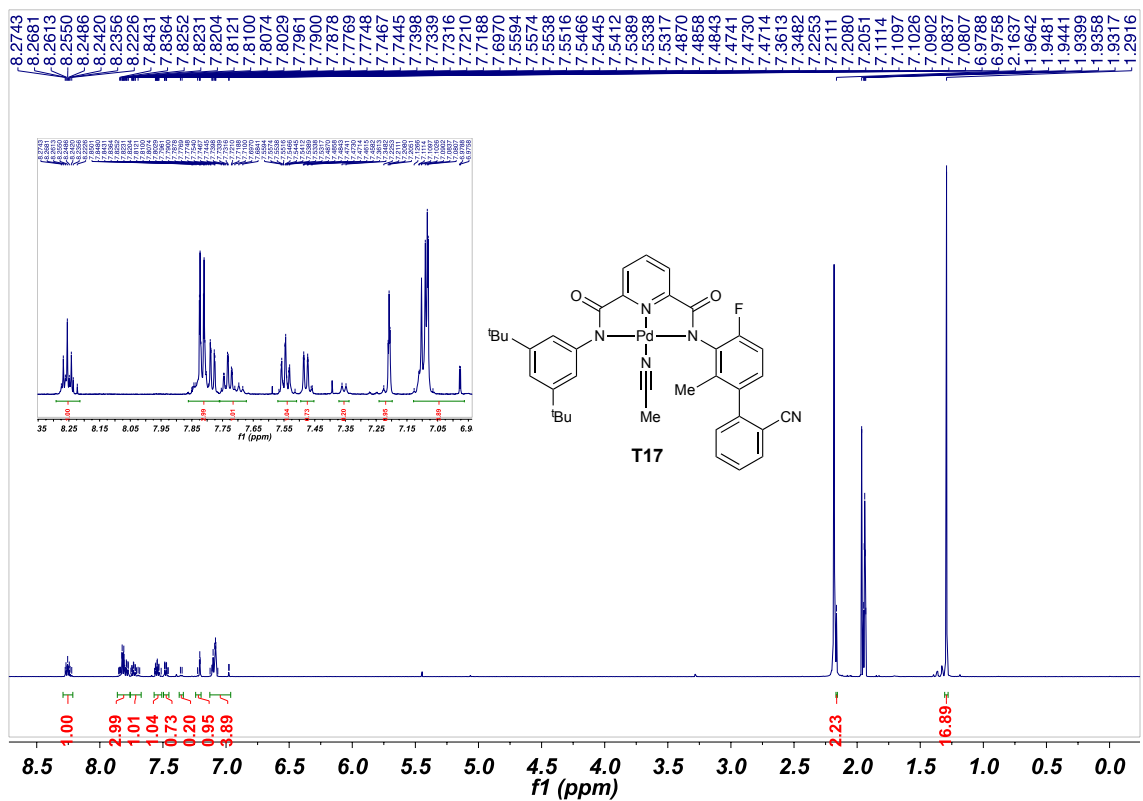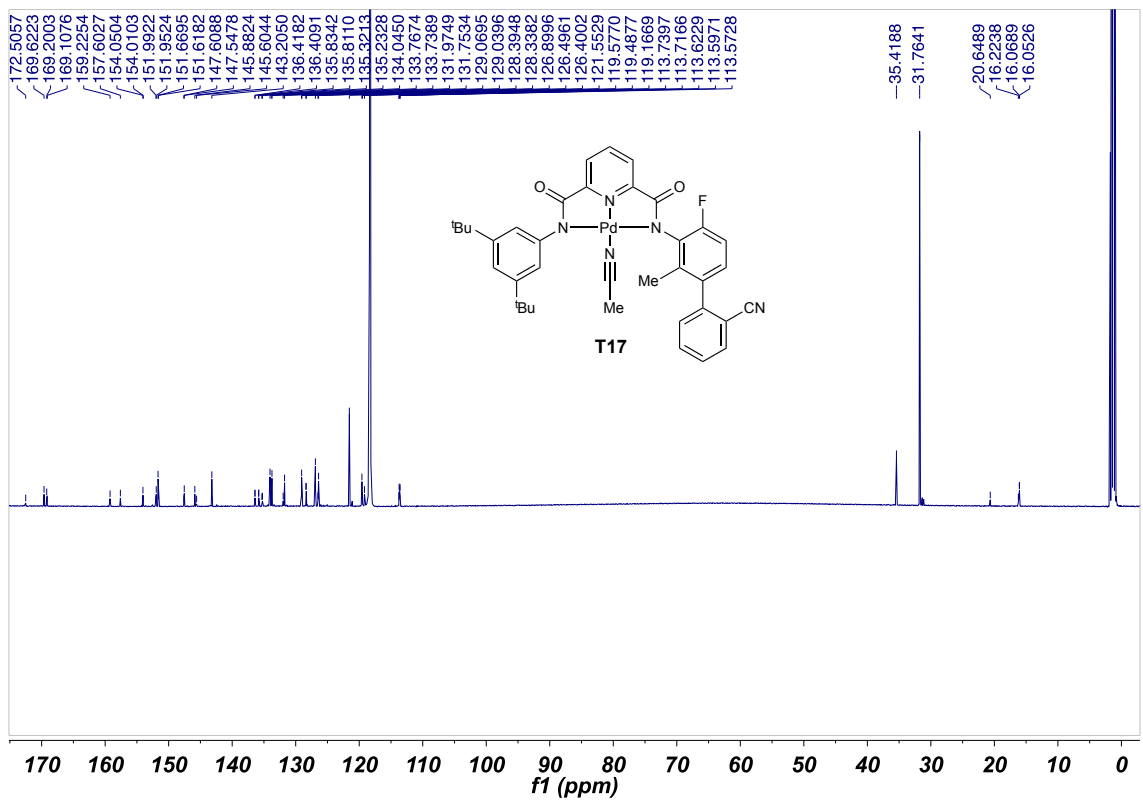



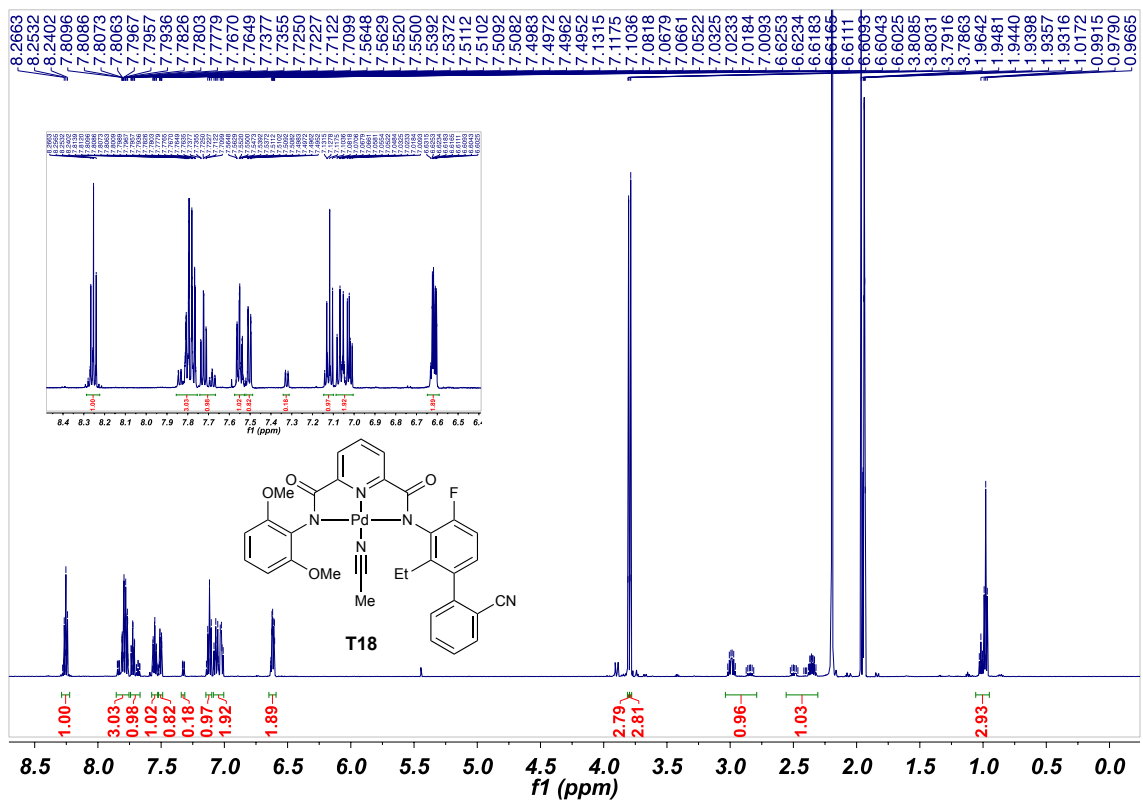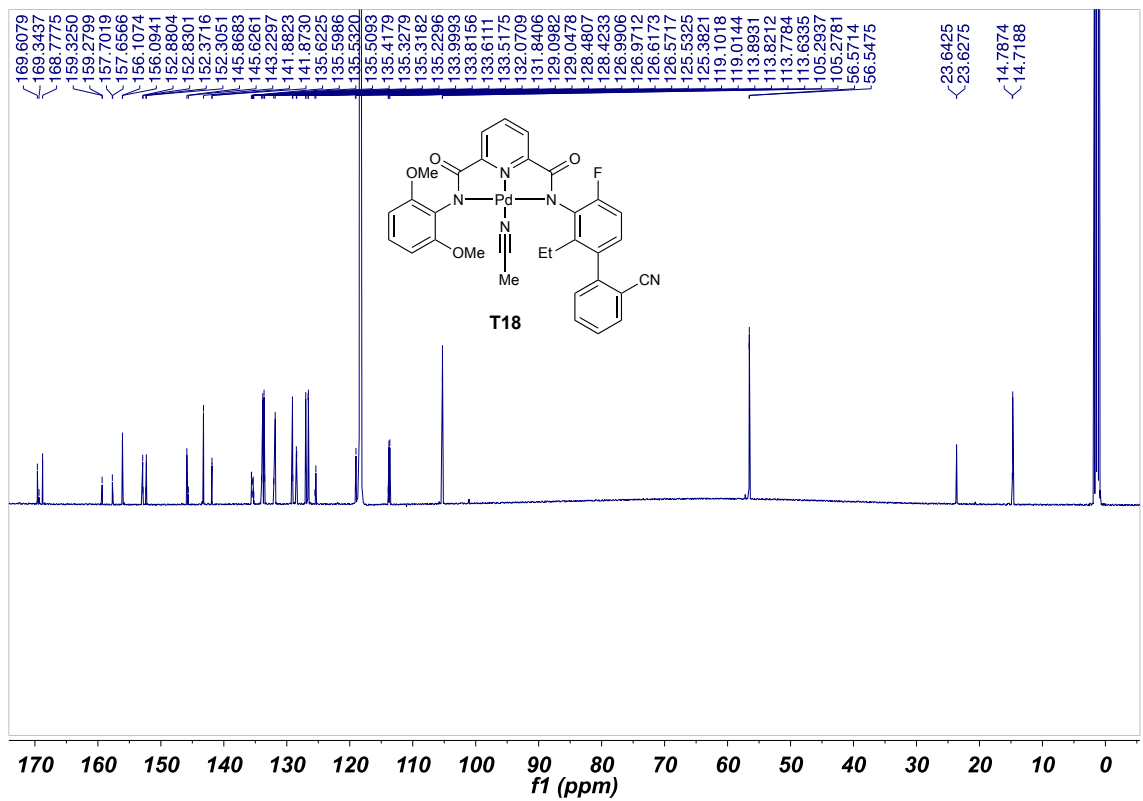

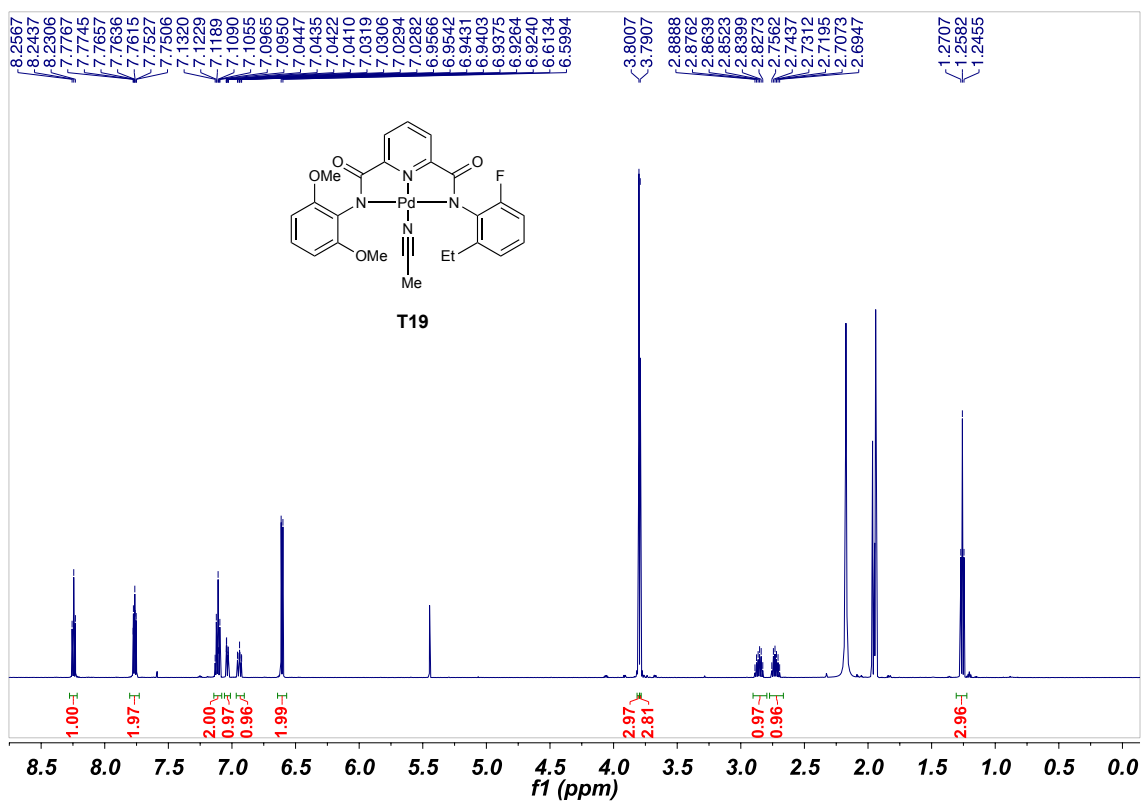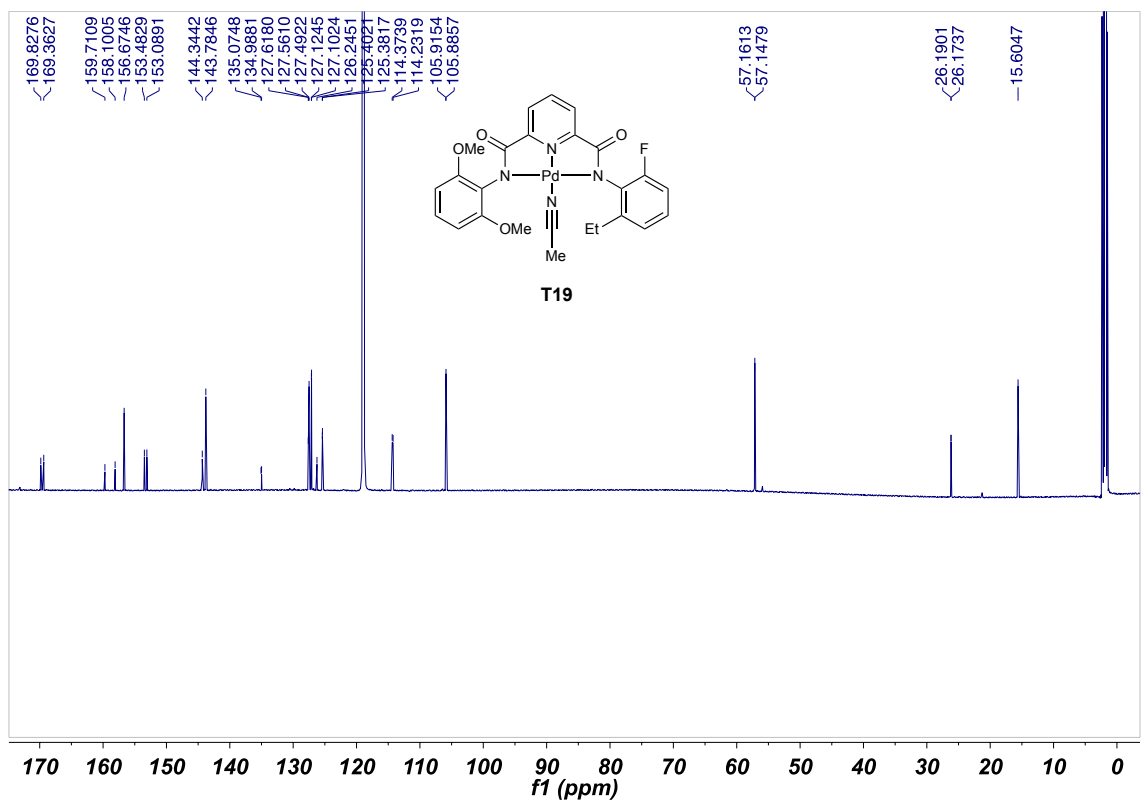

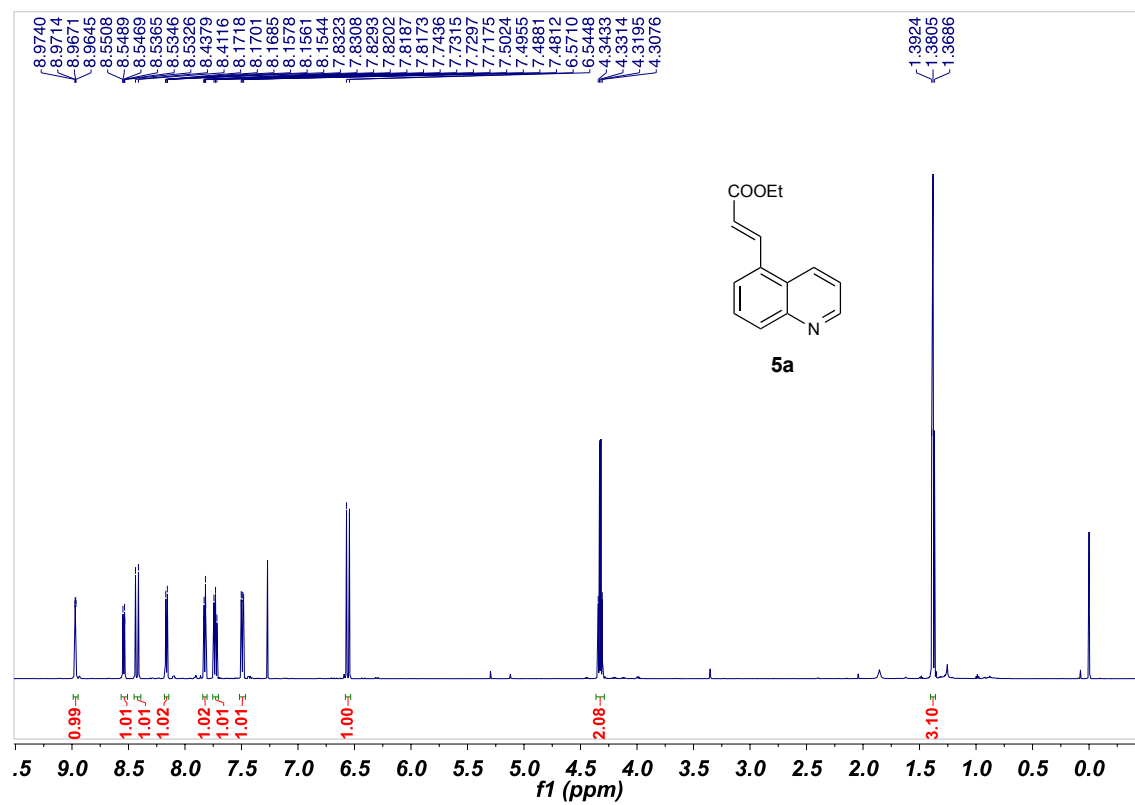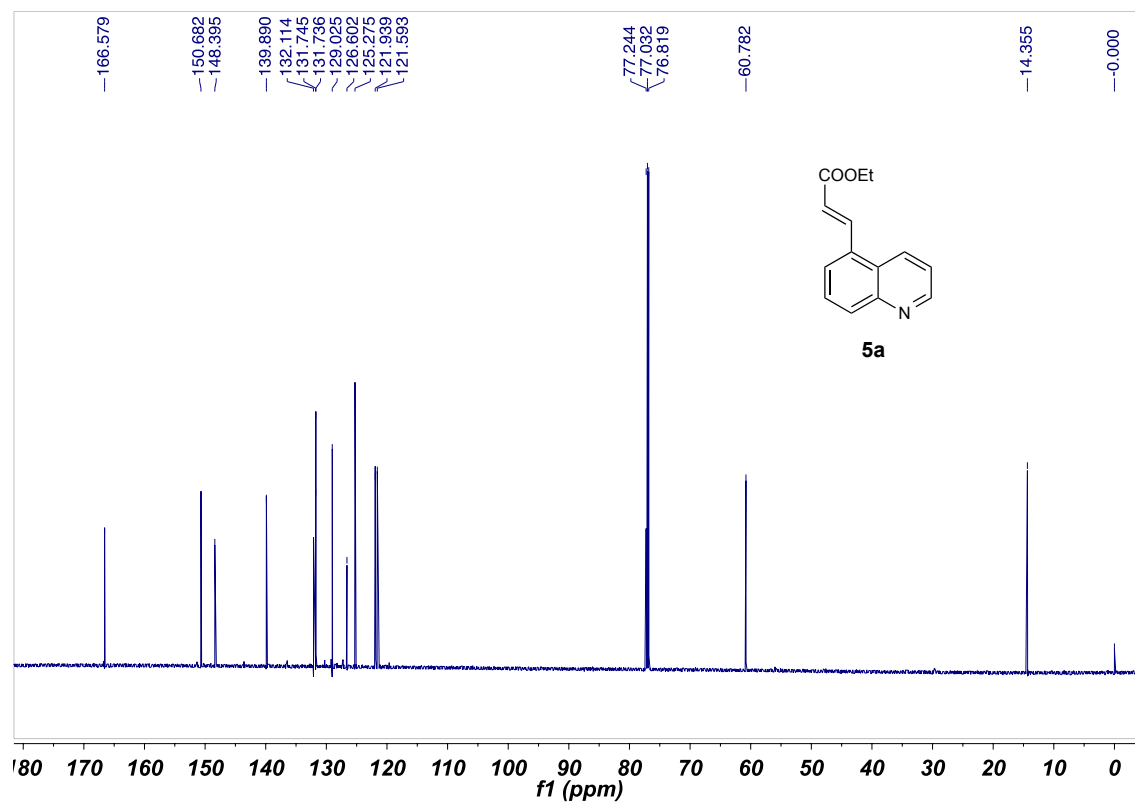

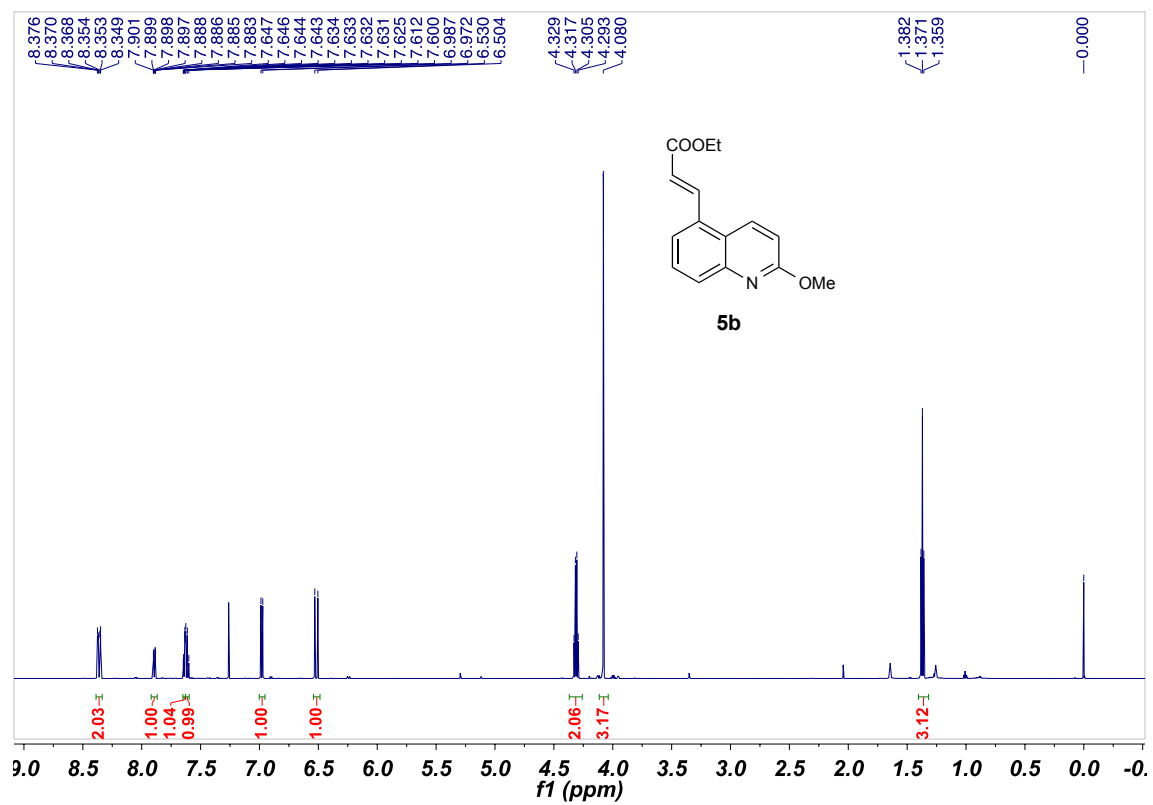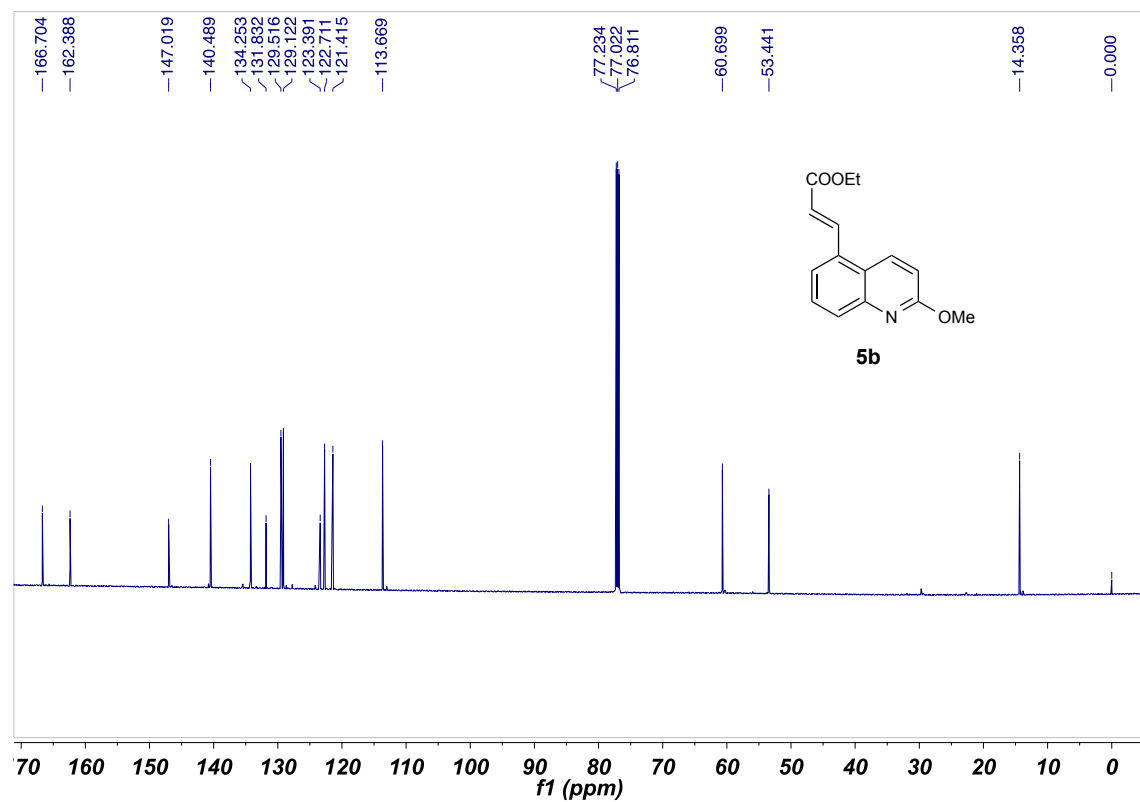

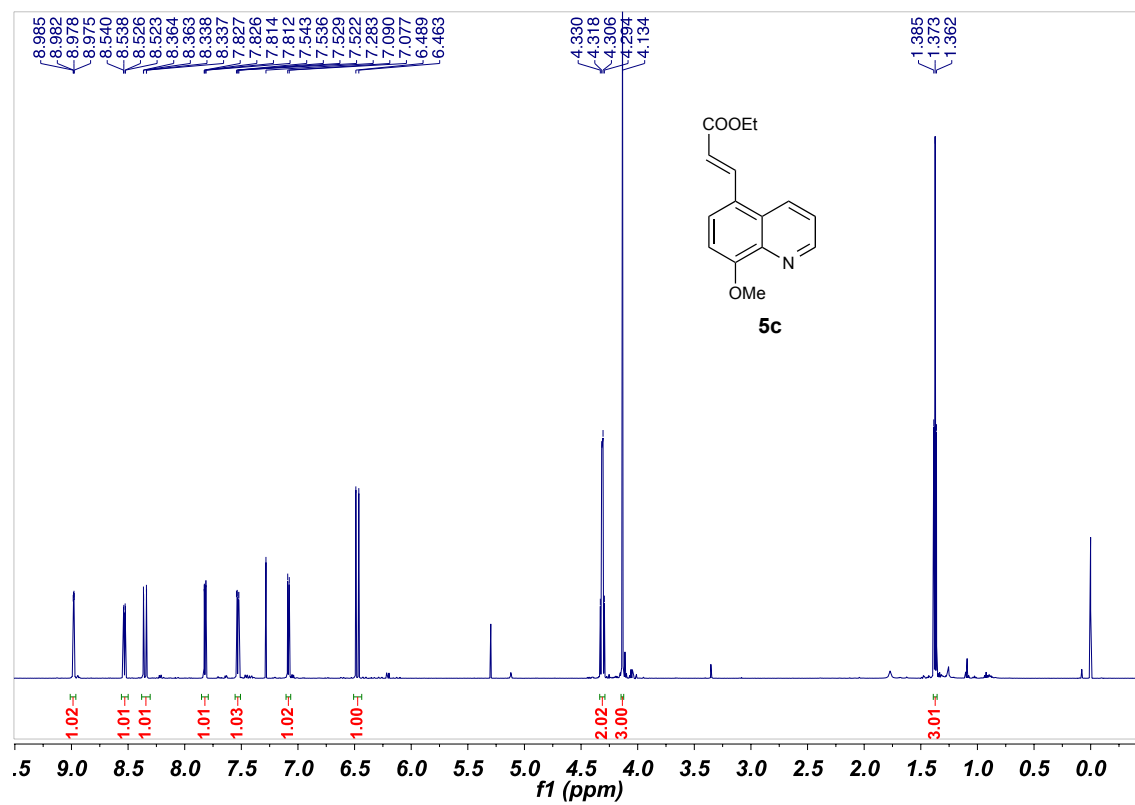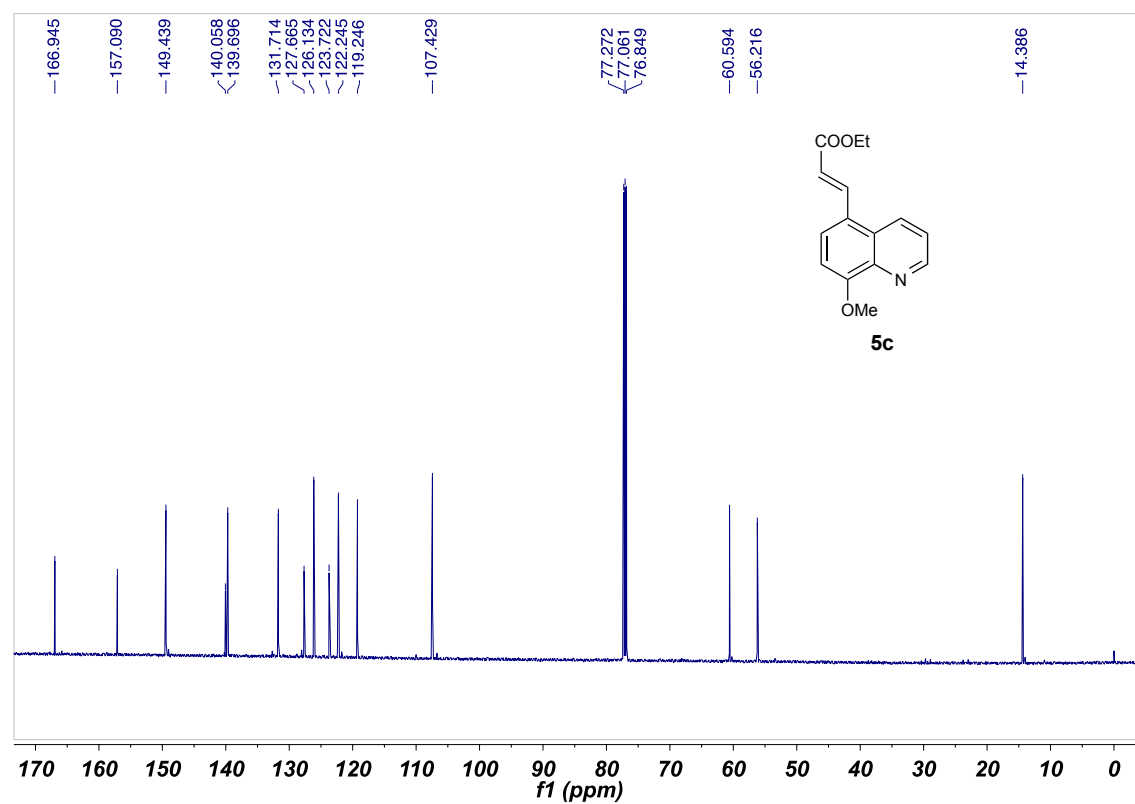

## 2D NOESY of compound **5c**

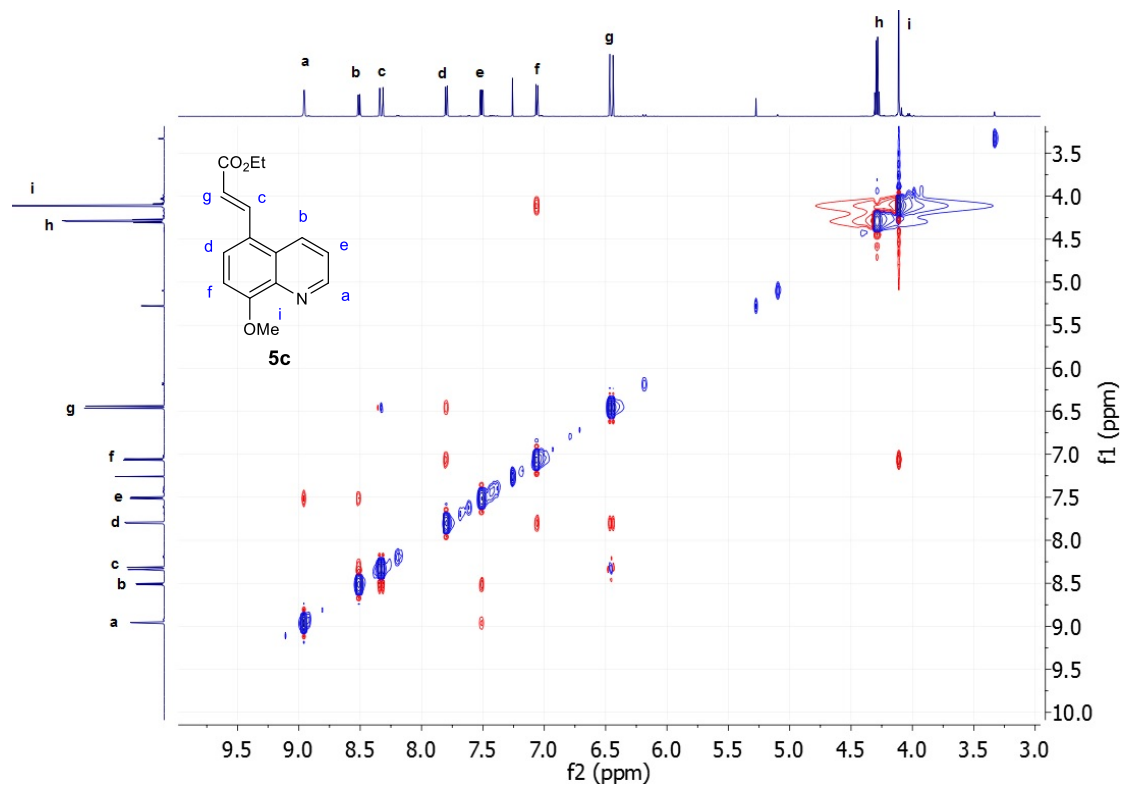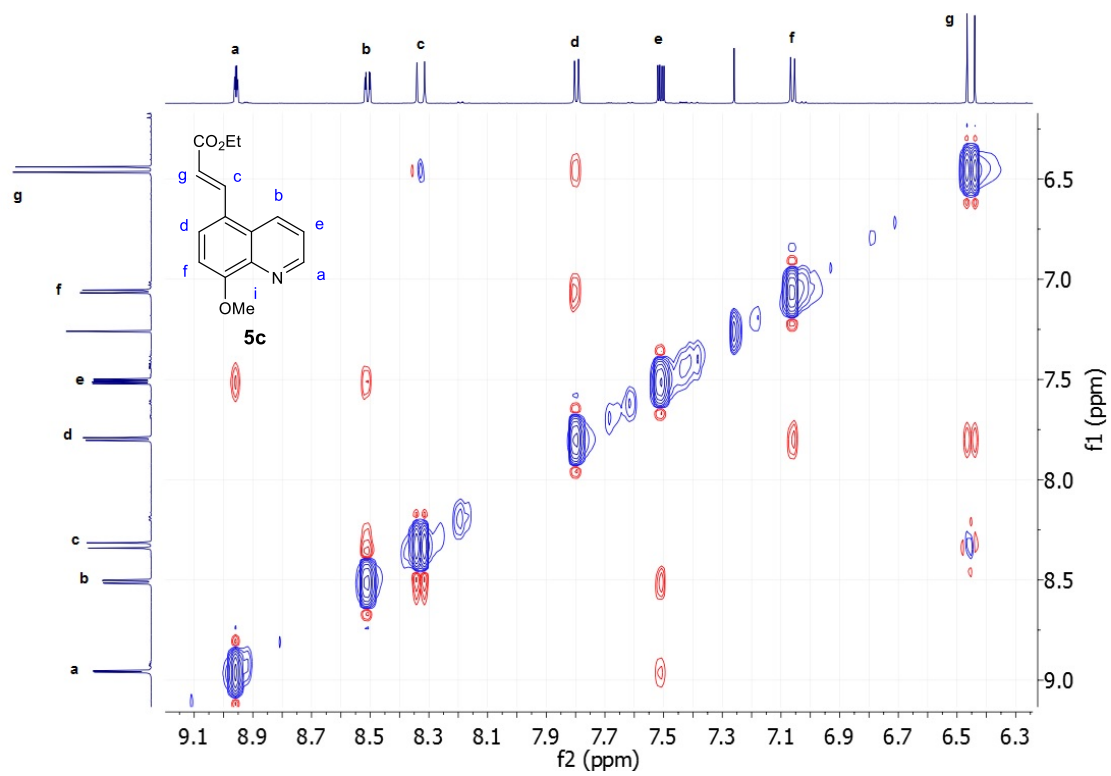

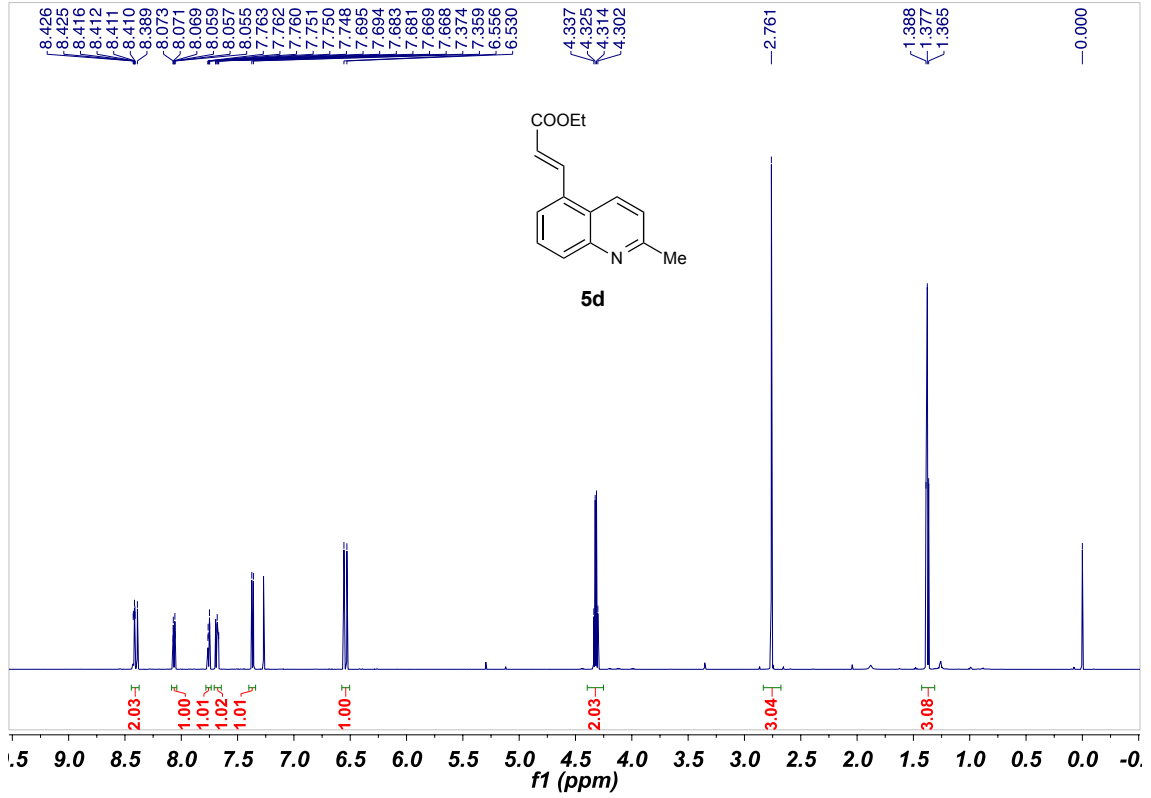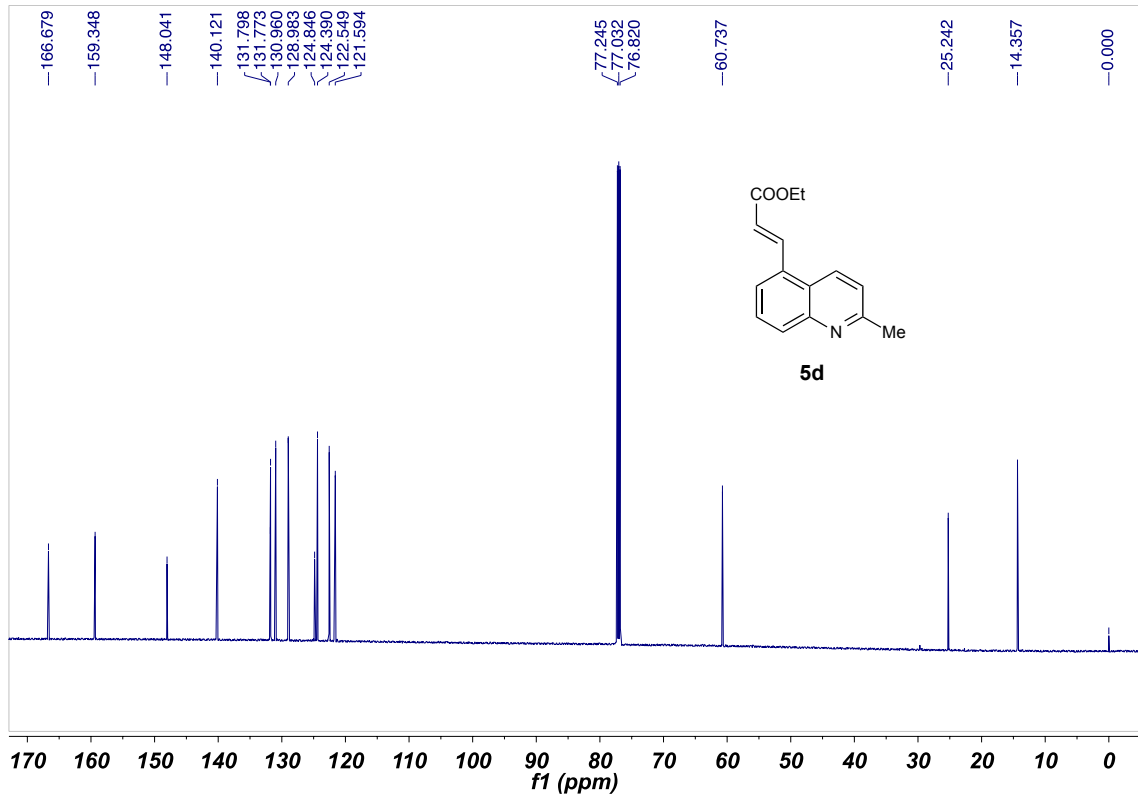

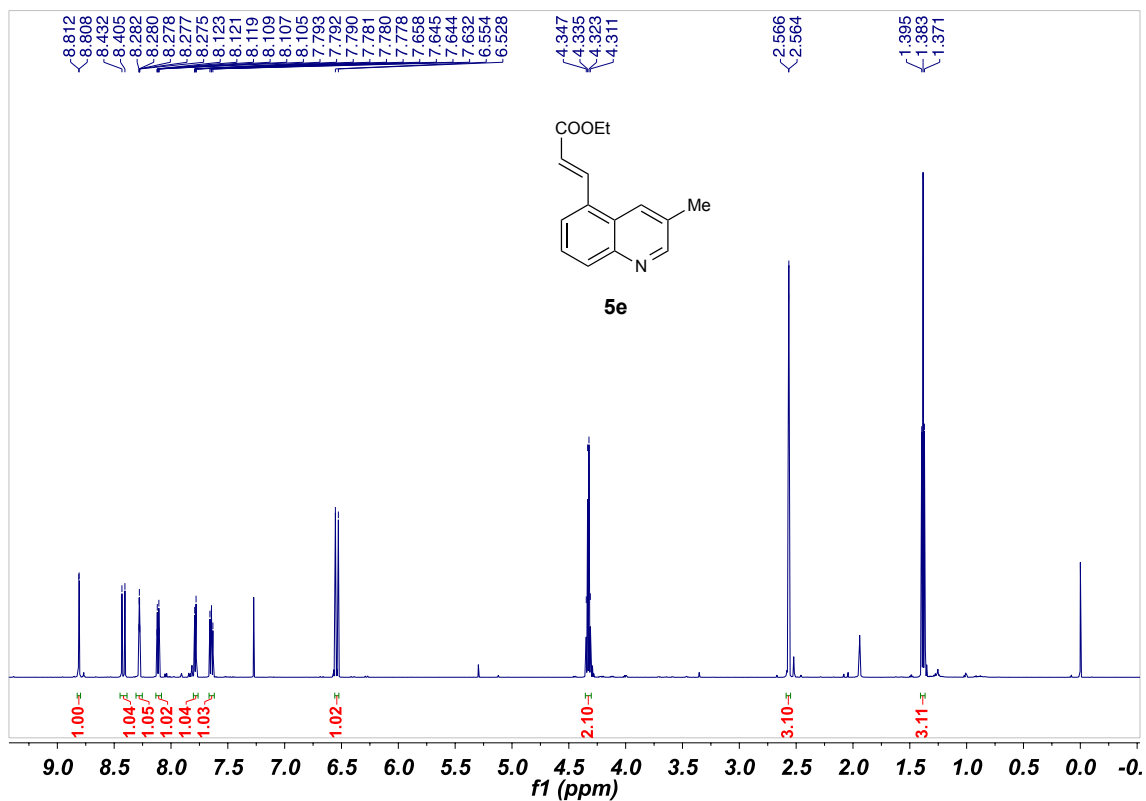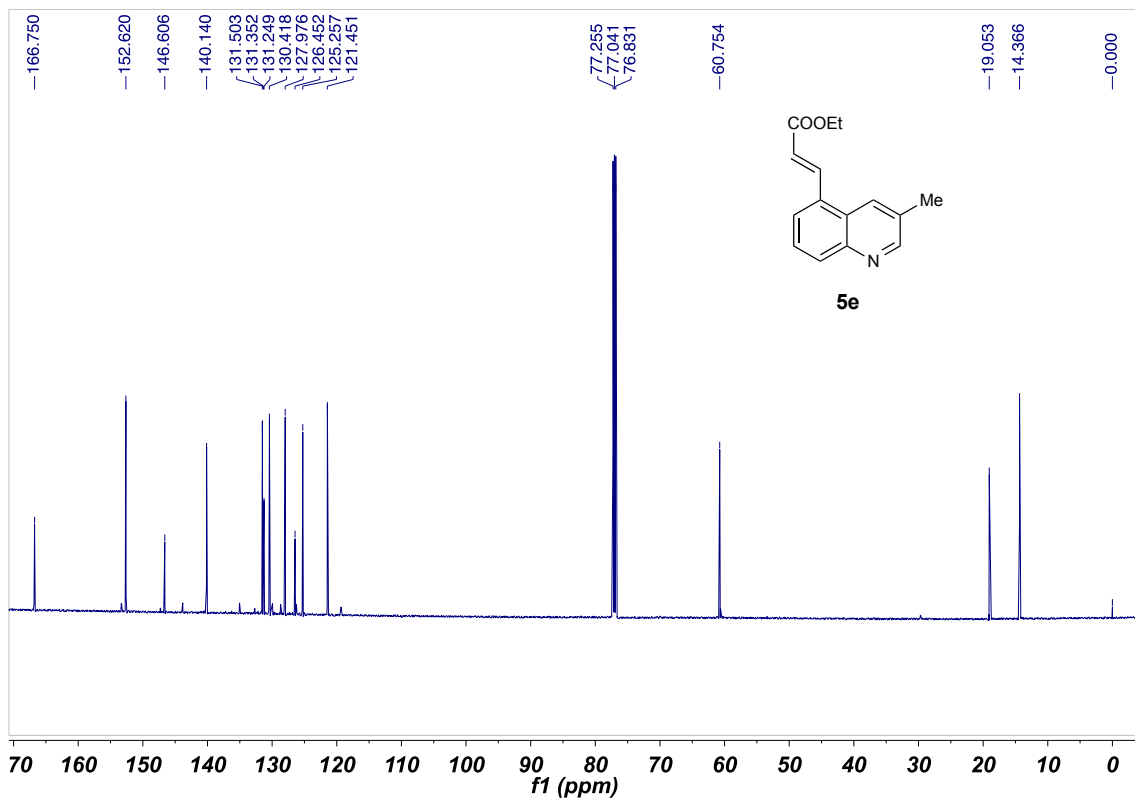





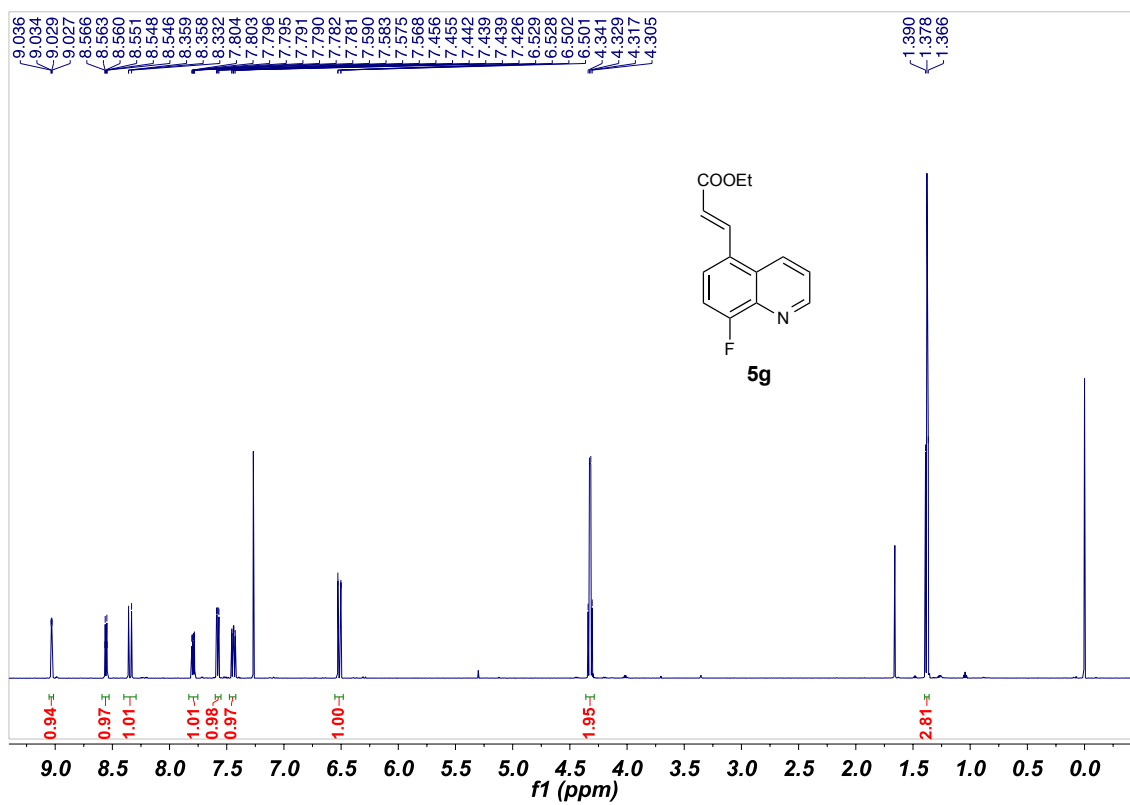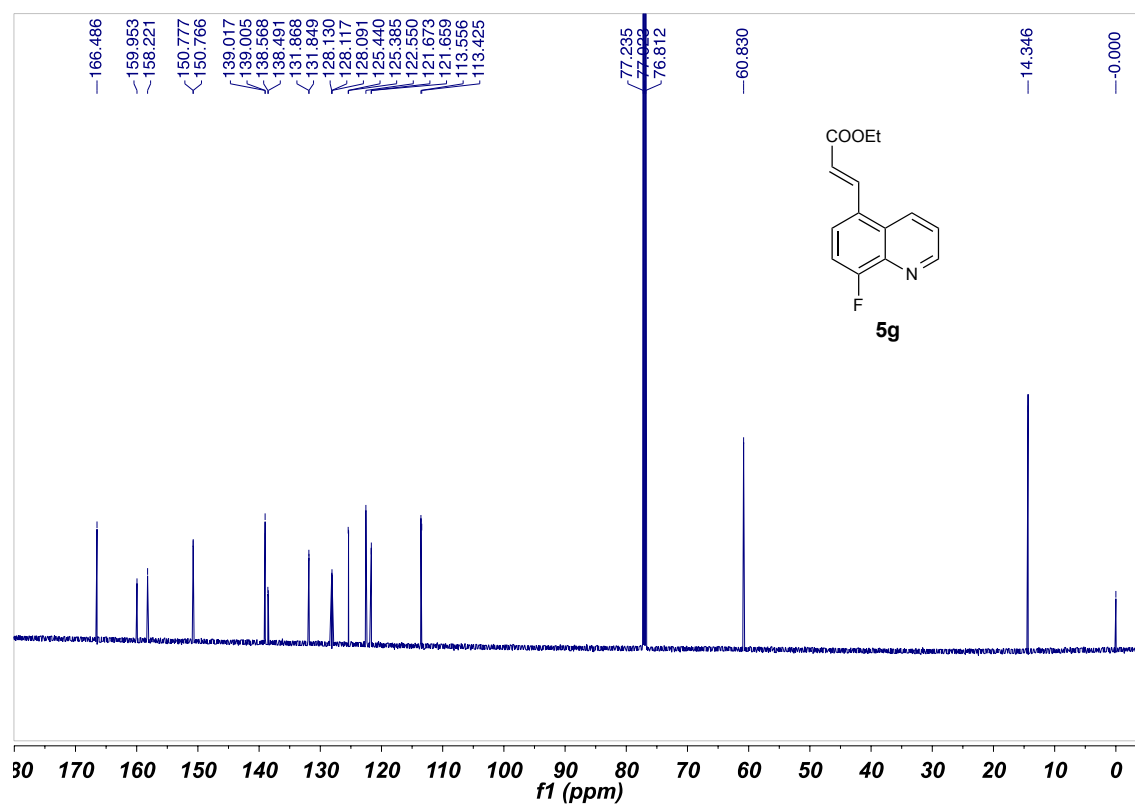

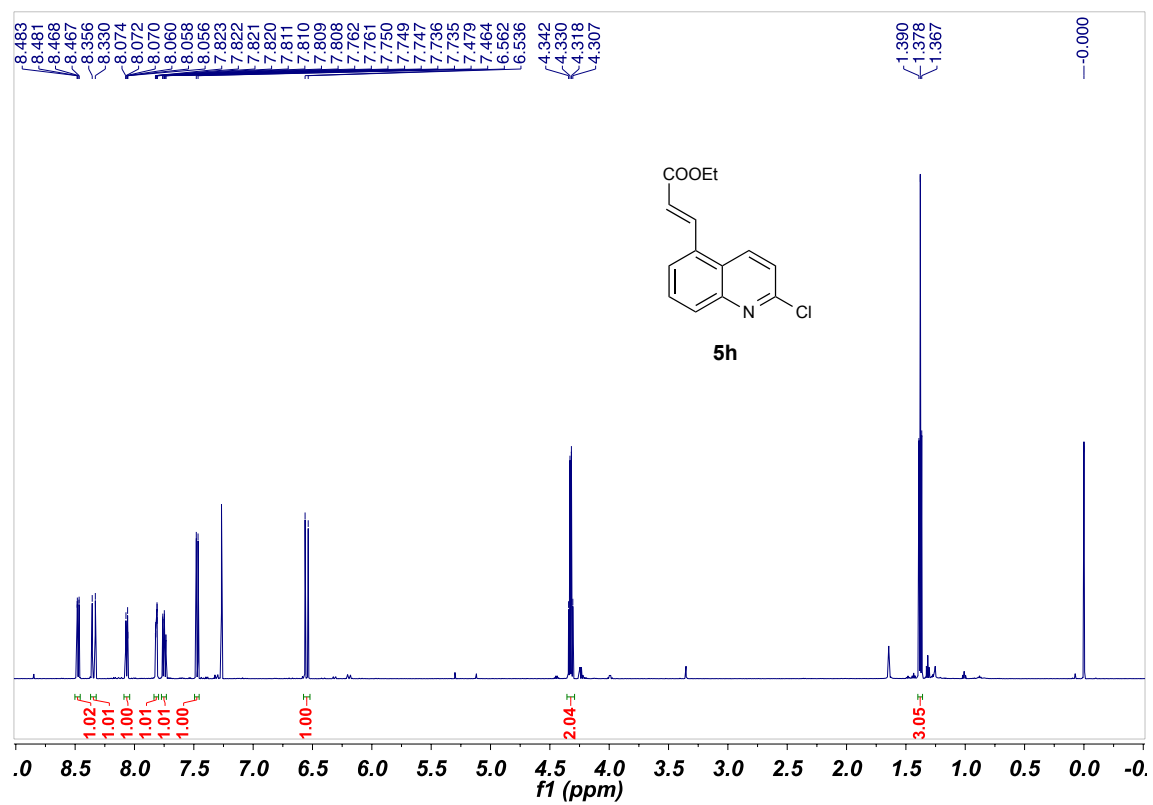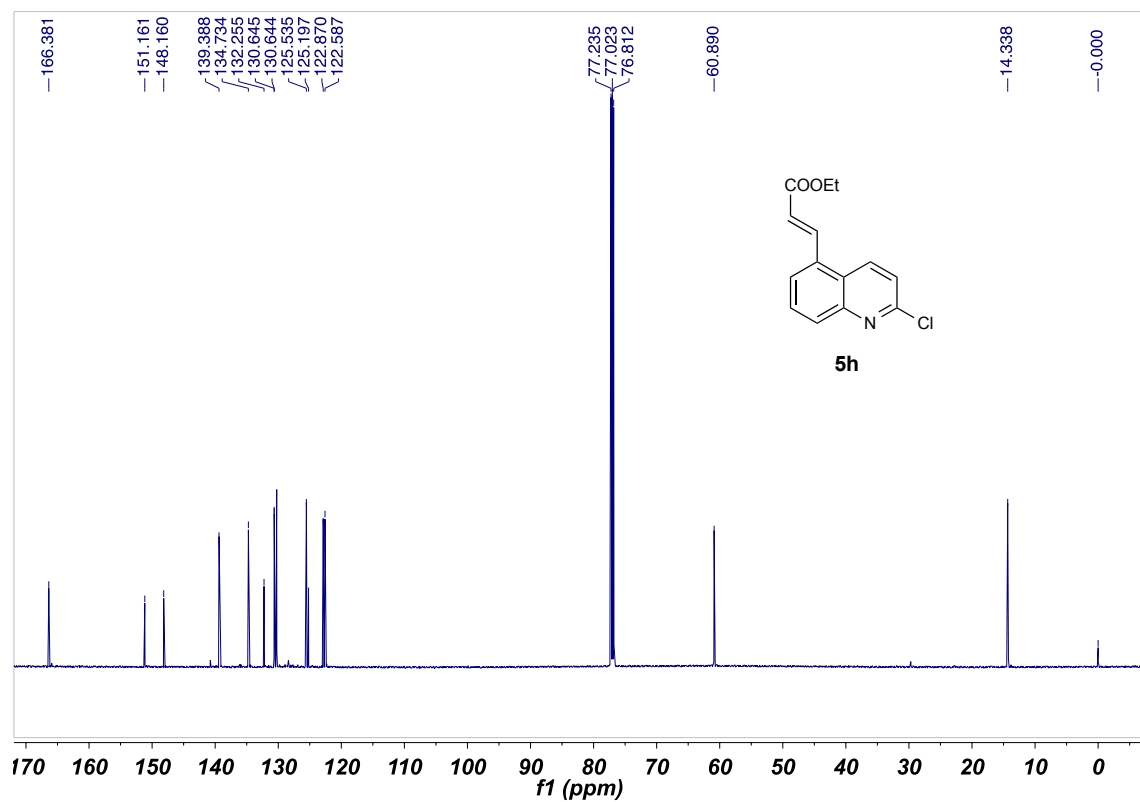

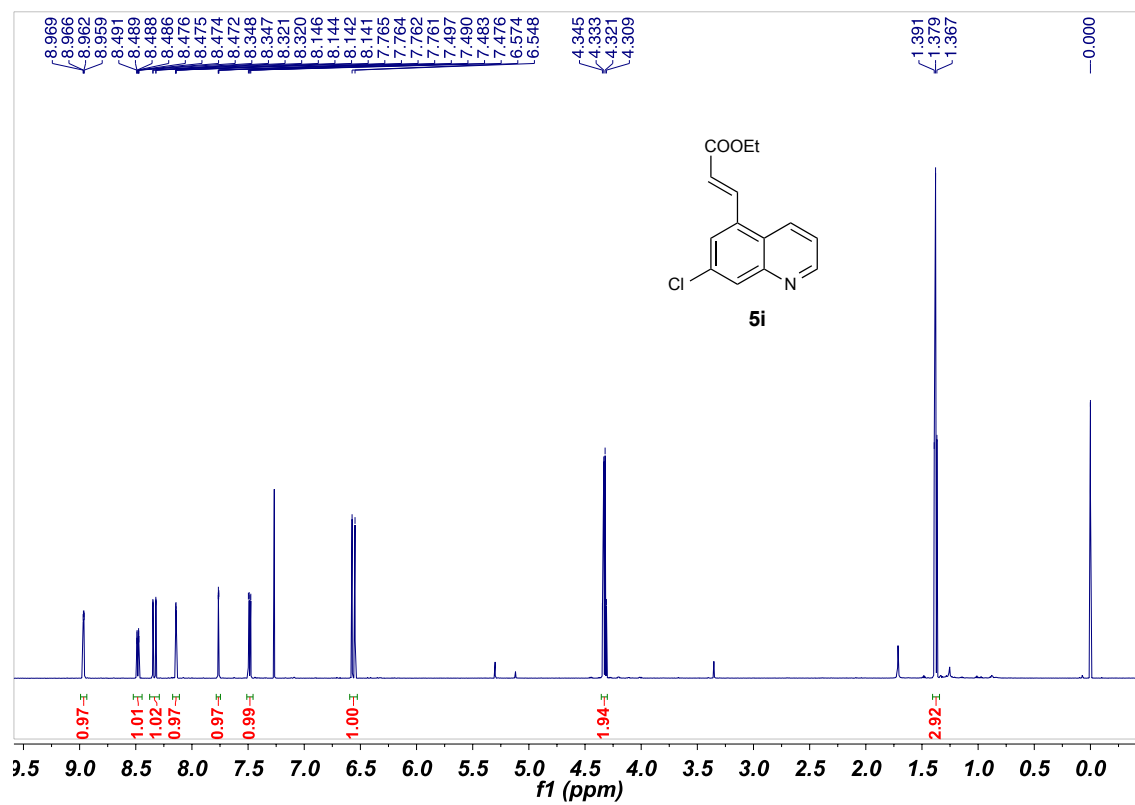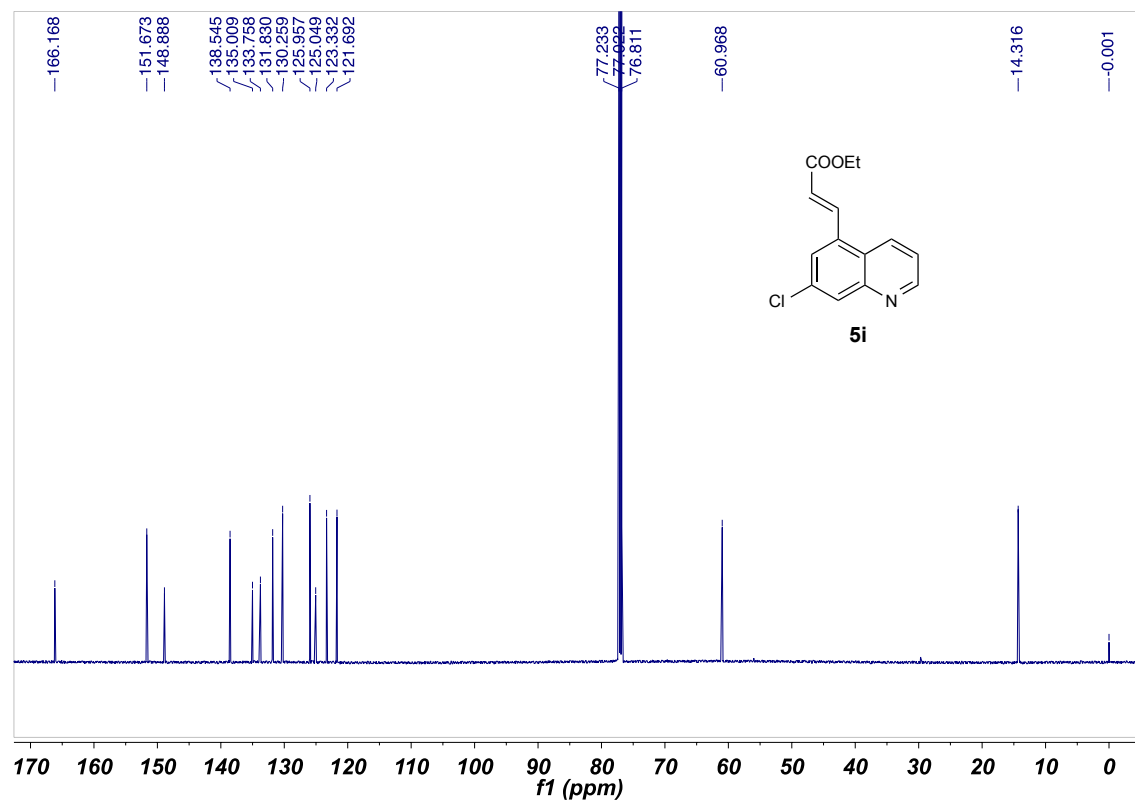

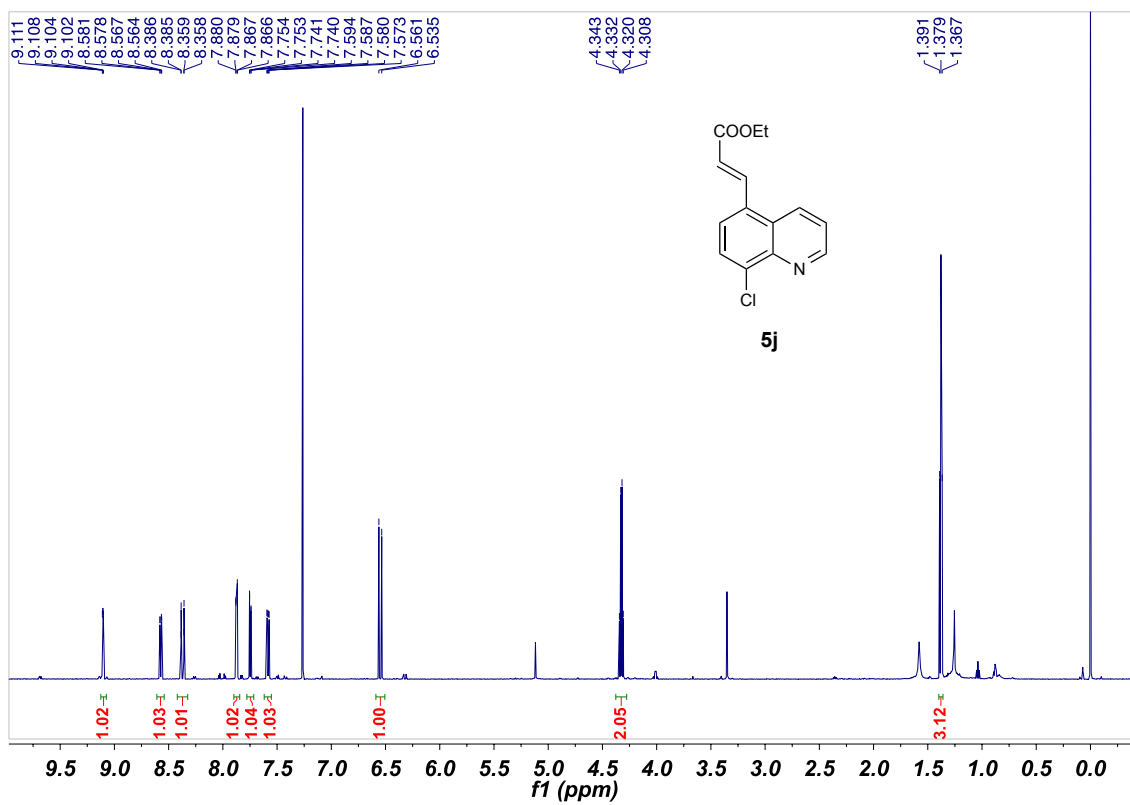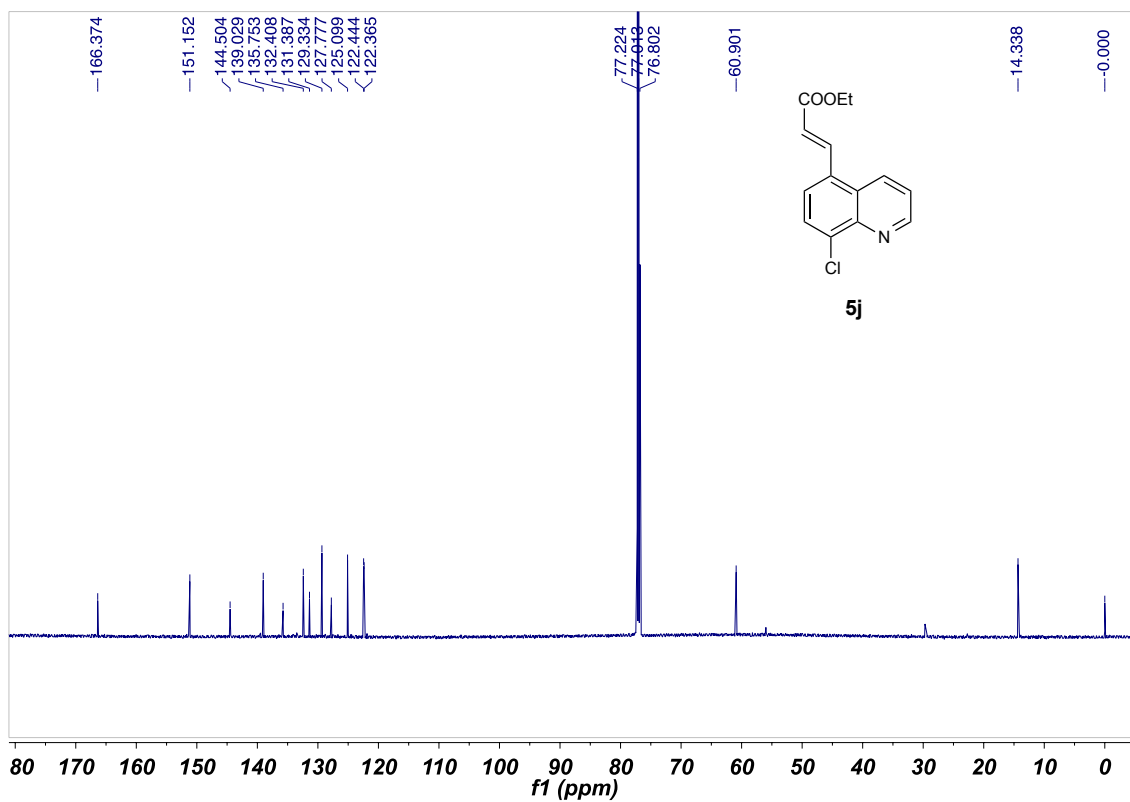

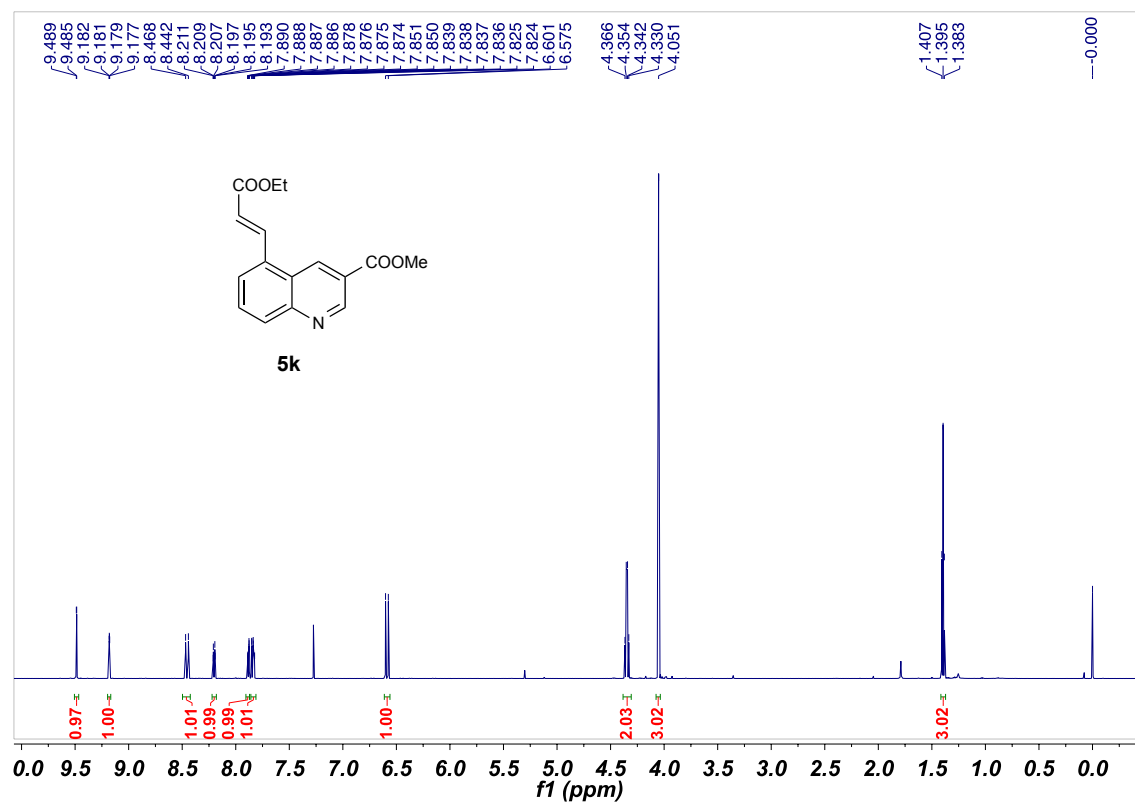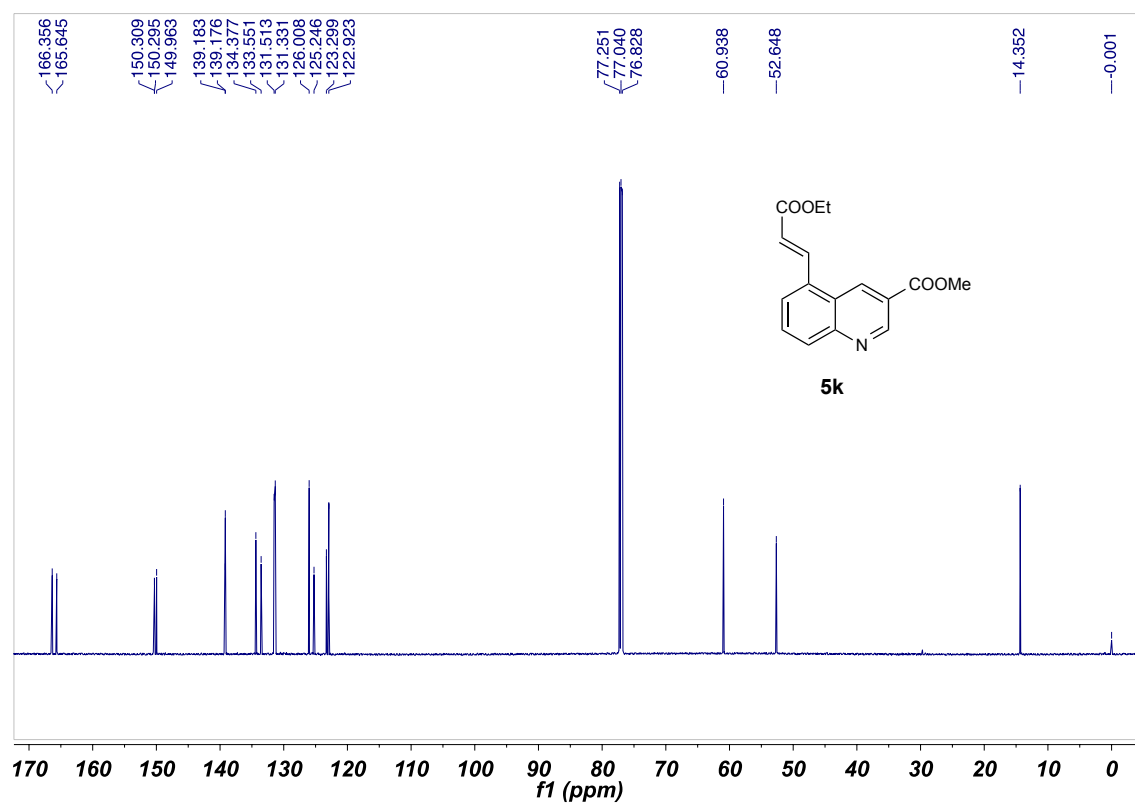

## 2D NOESY of compound **5k**

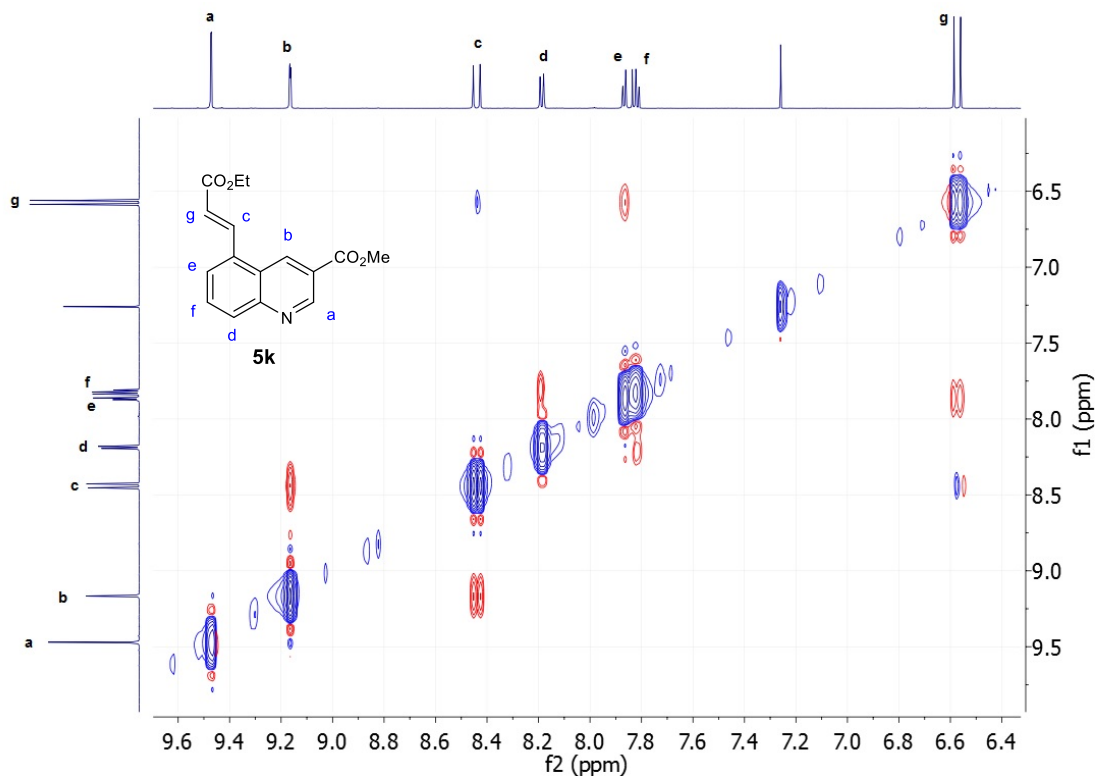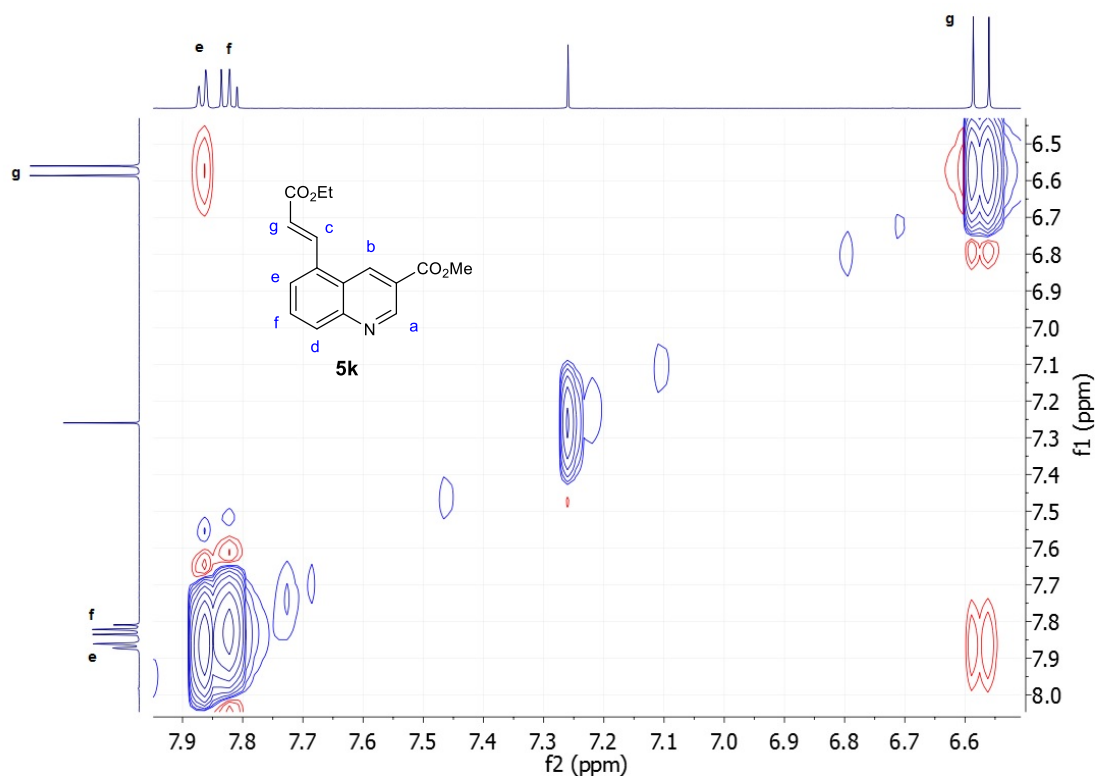

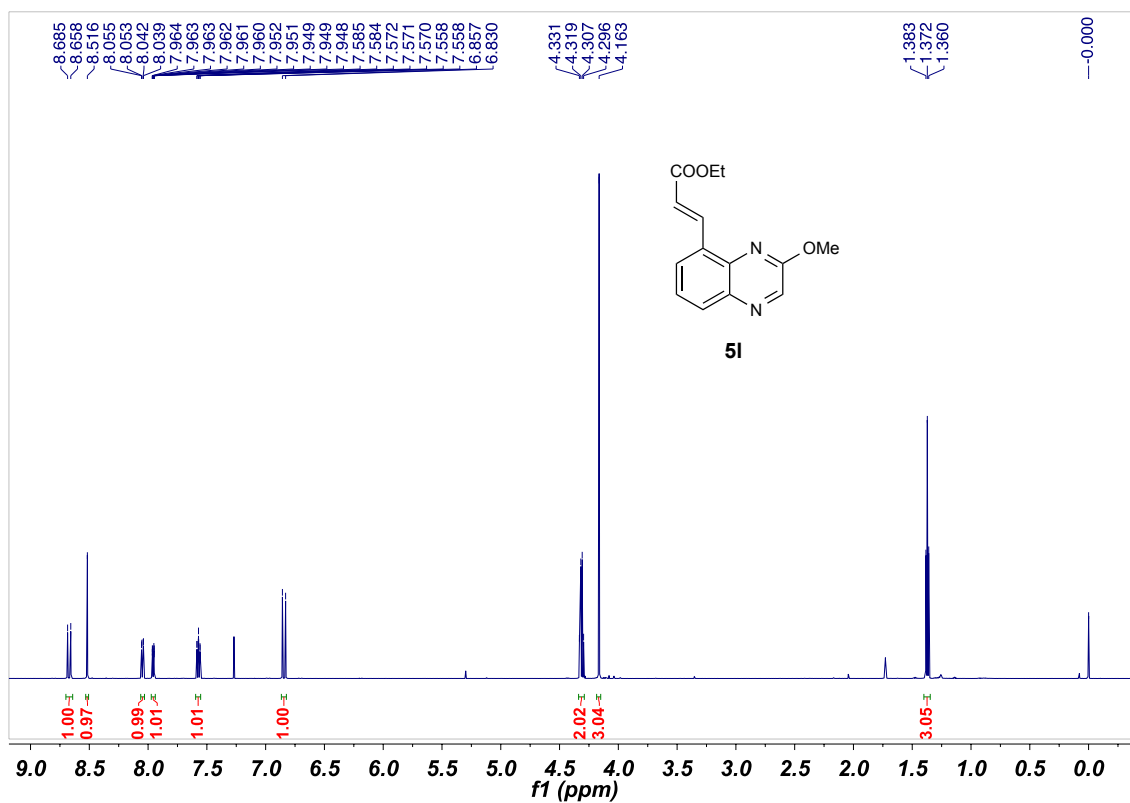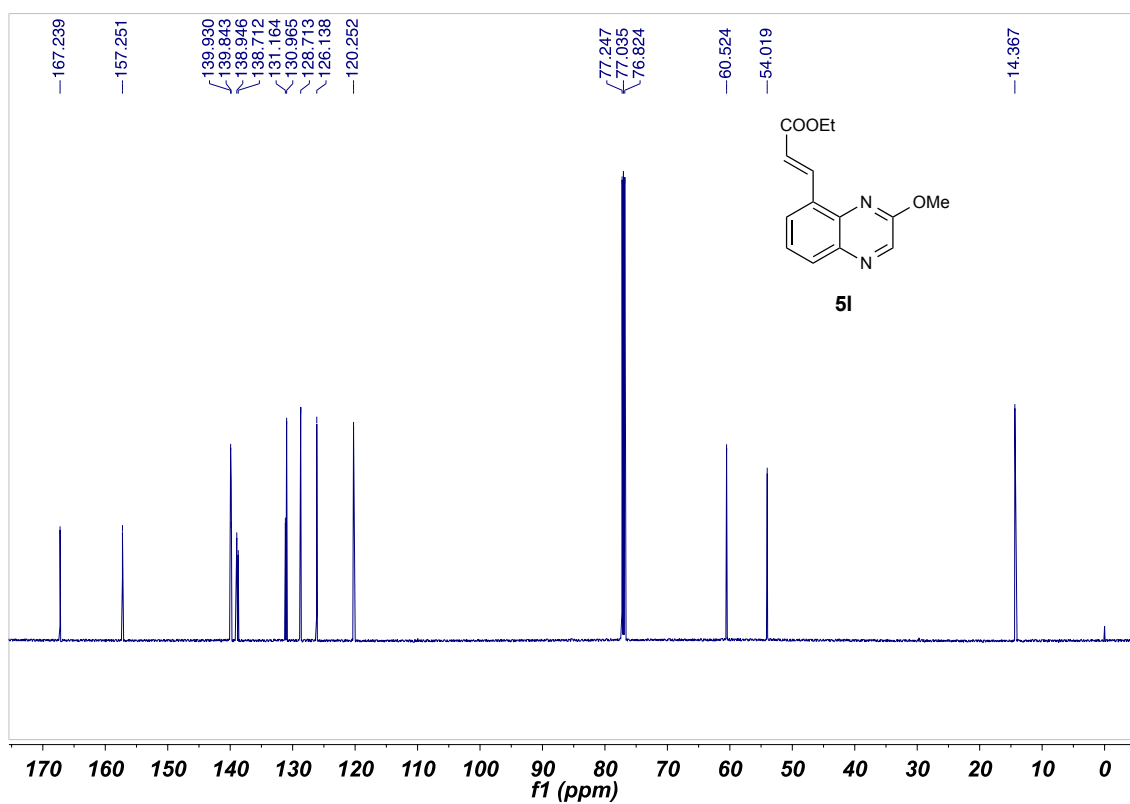



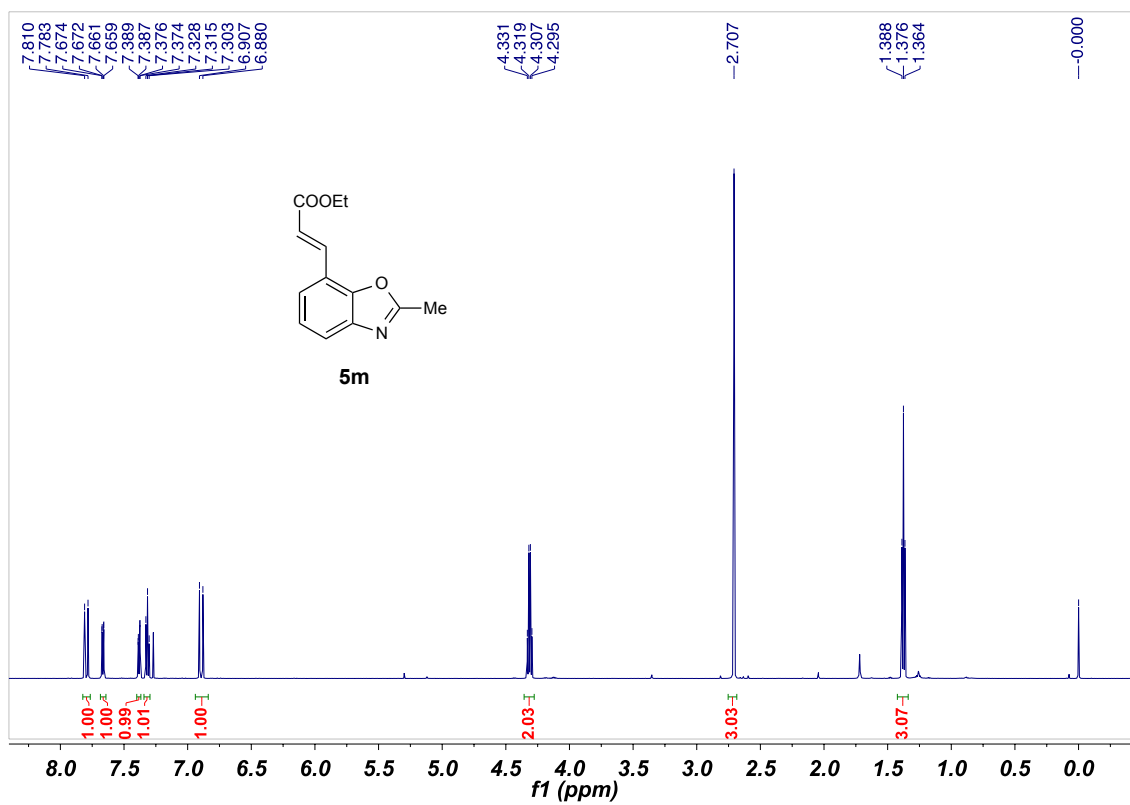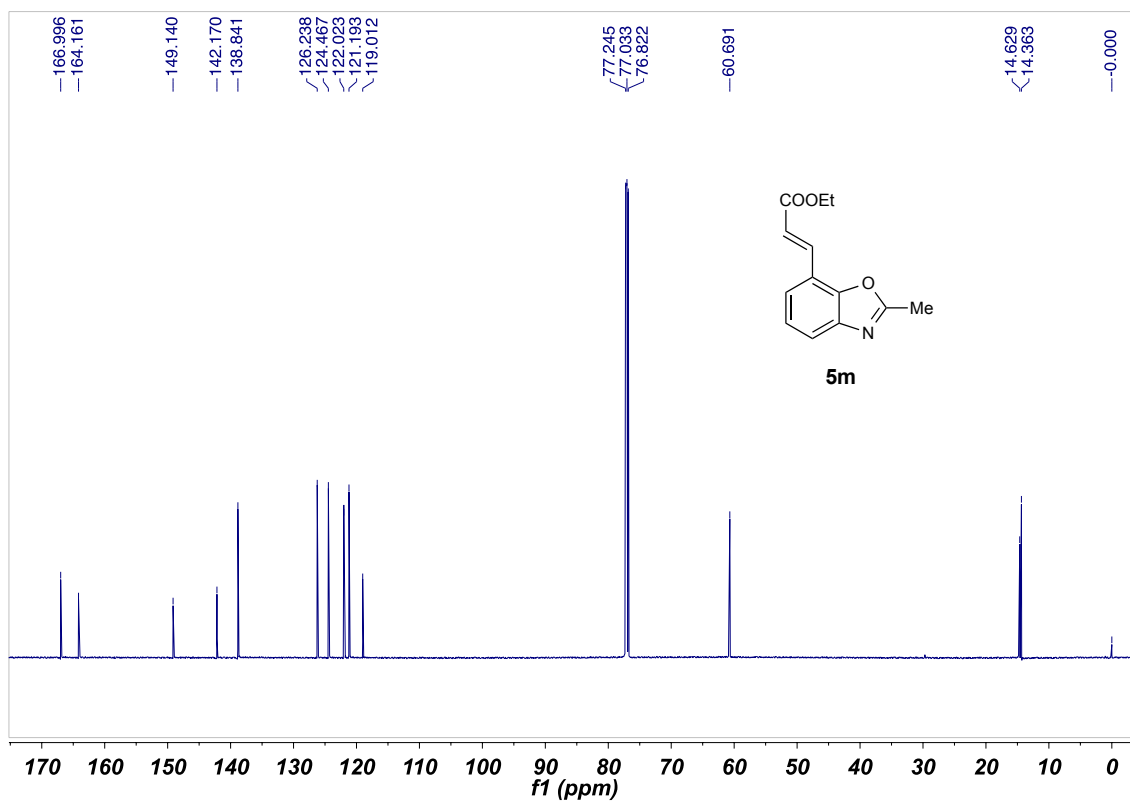

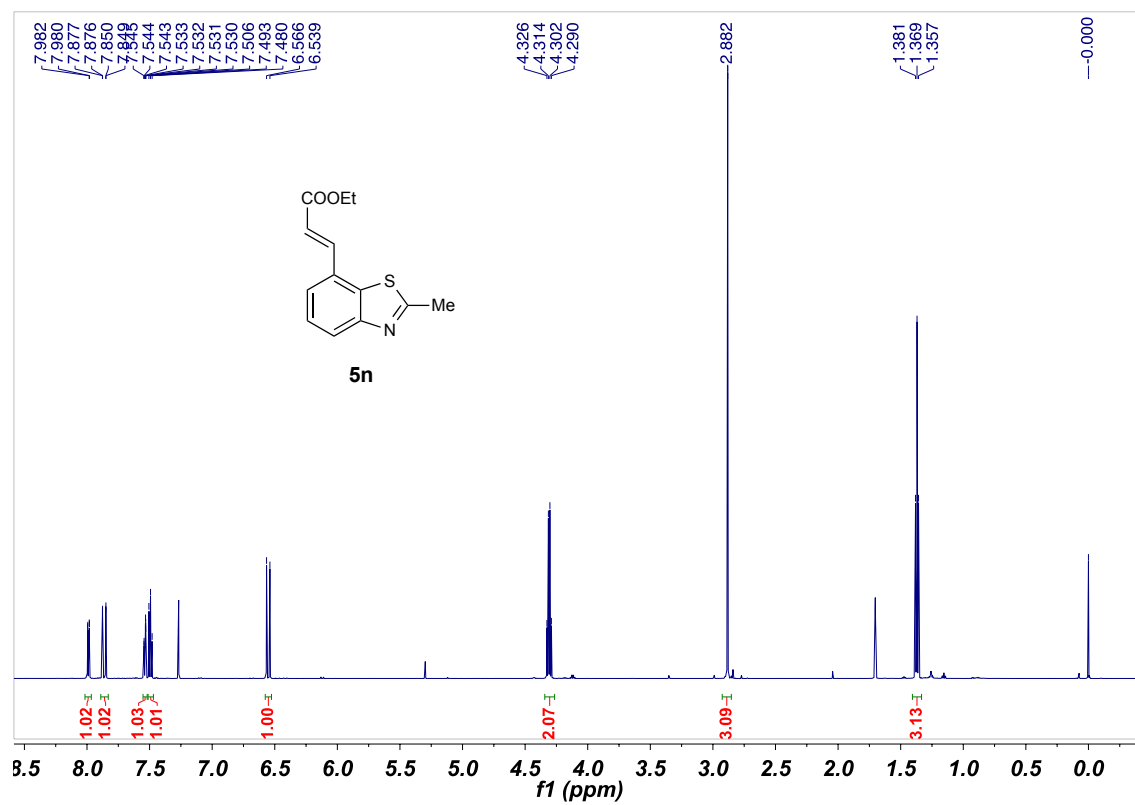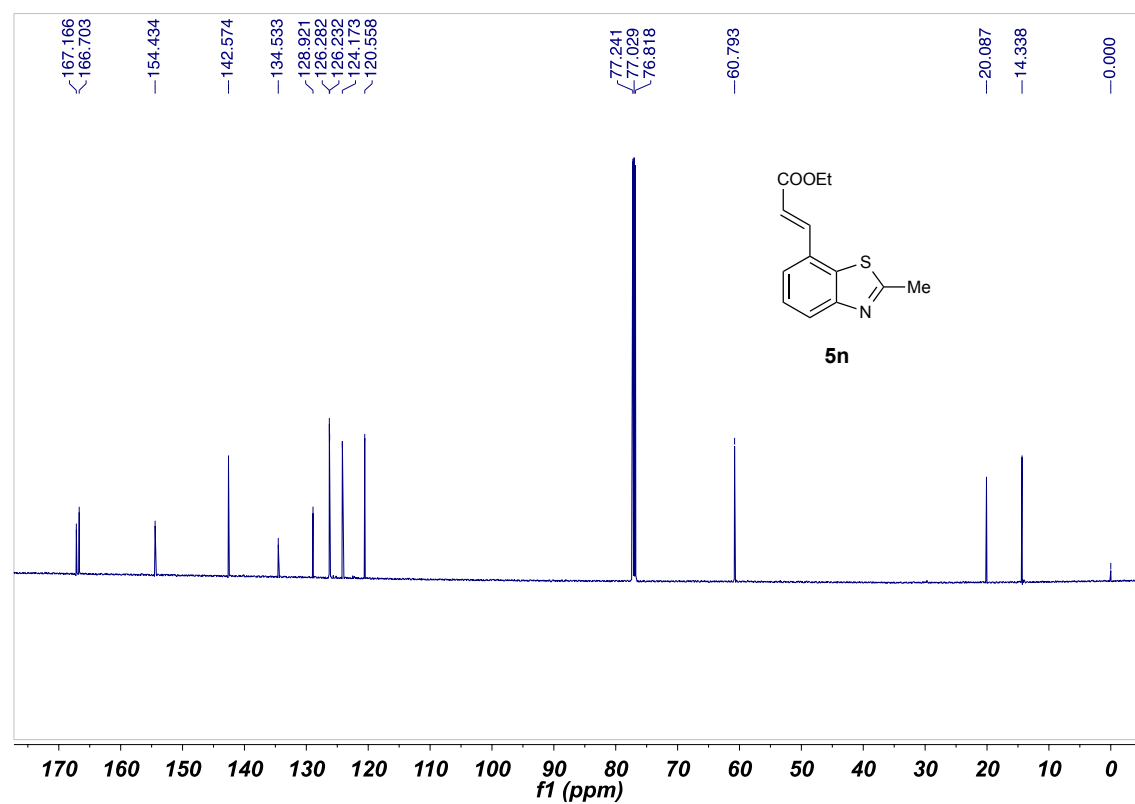

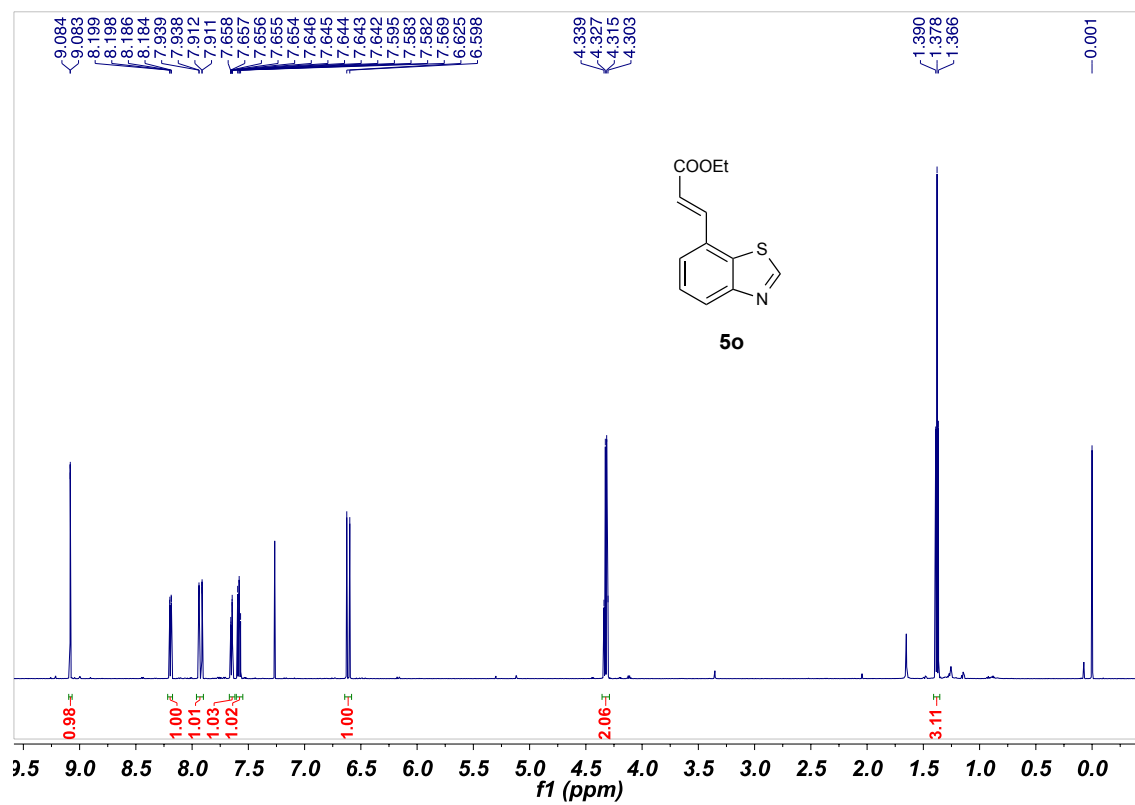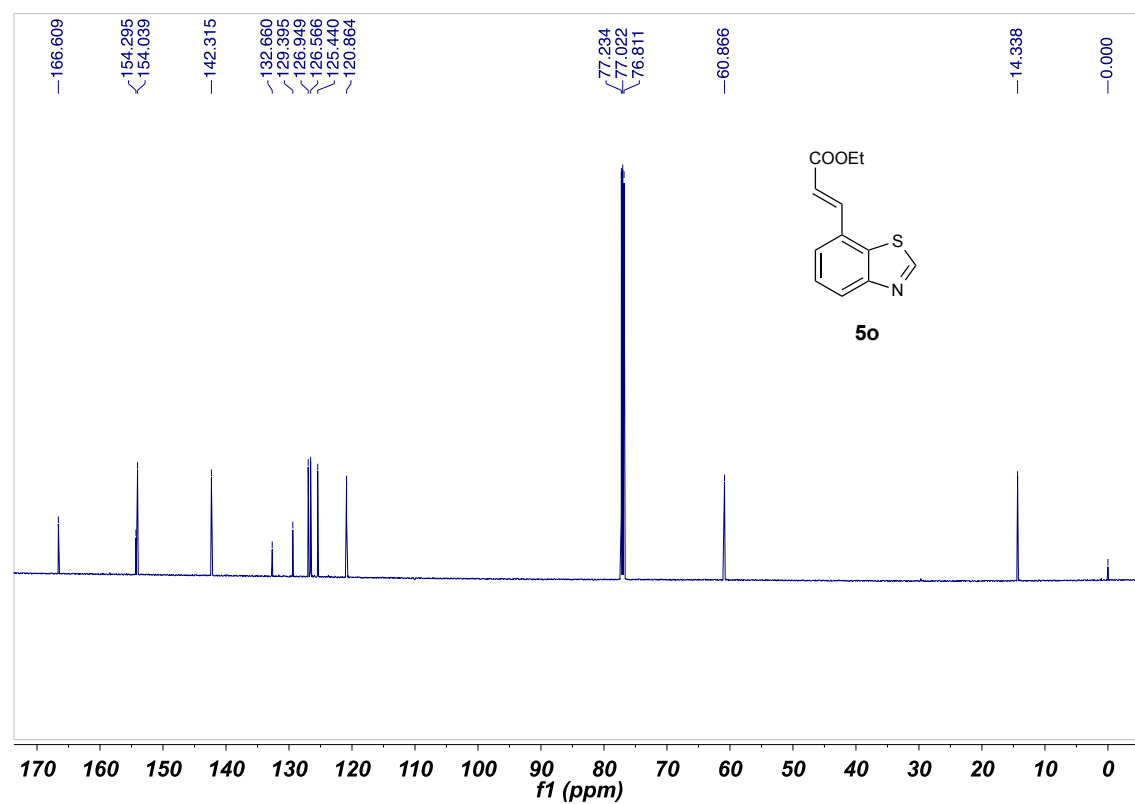

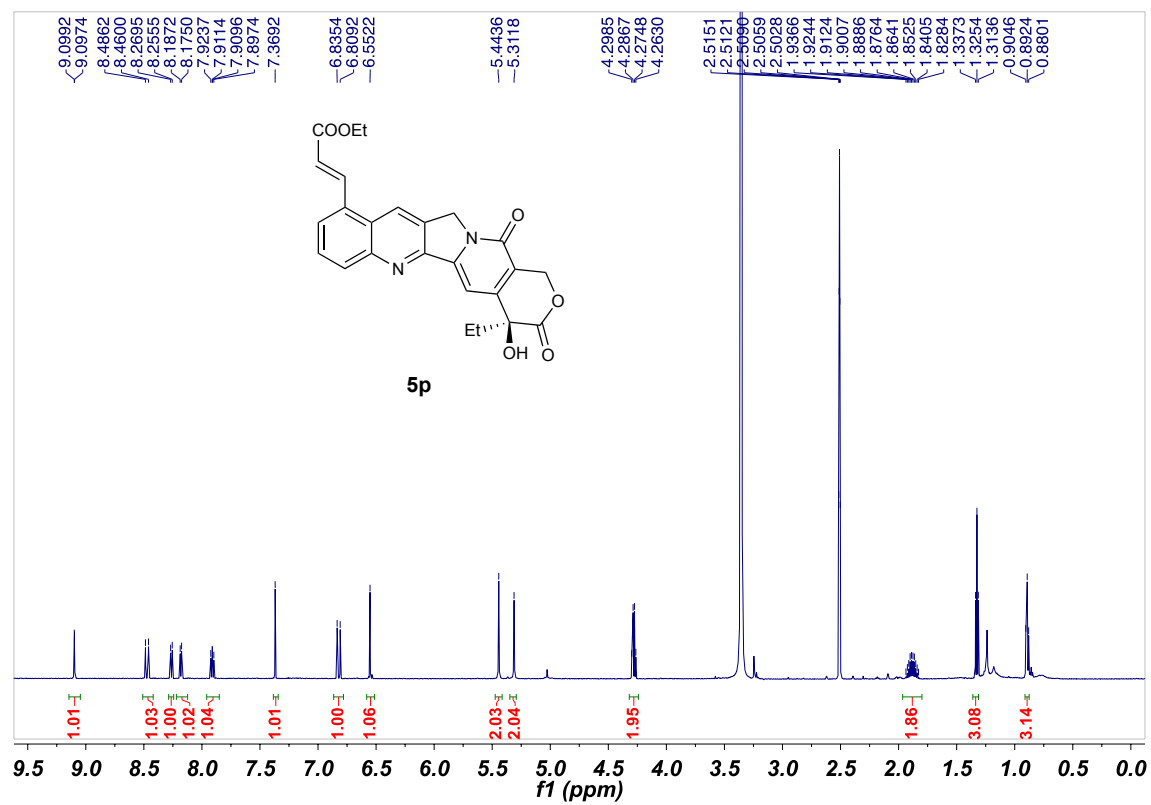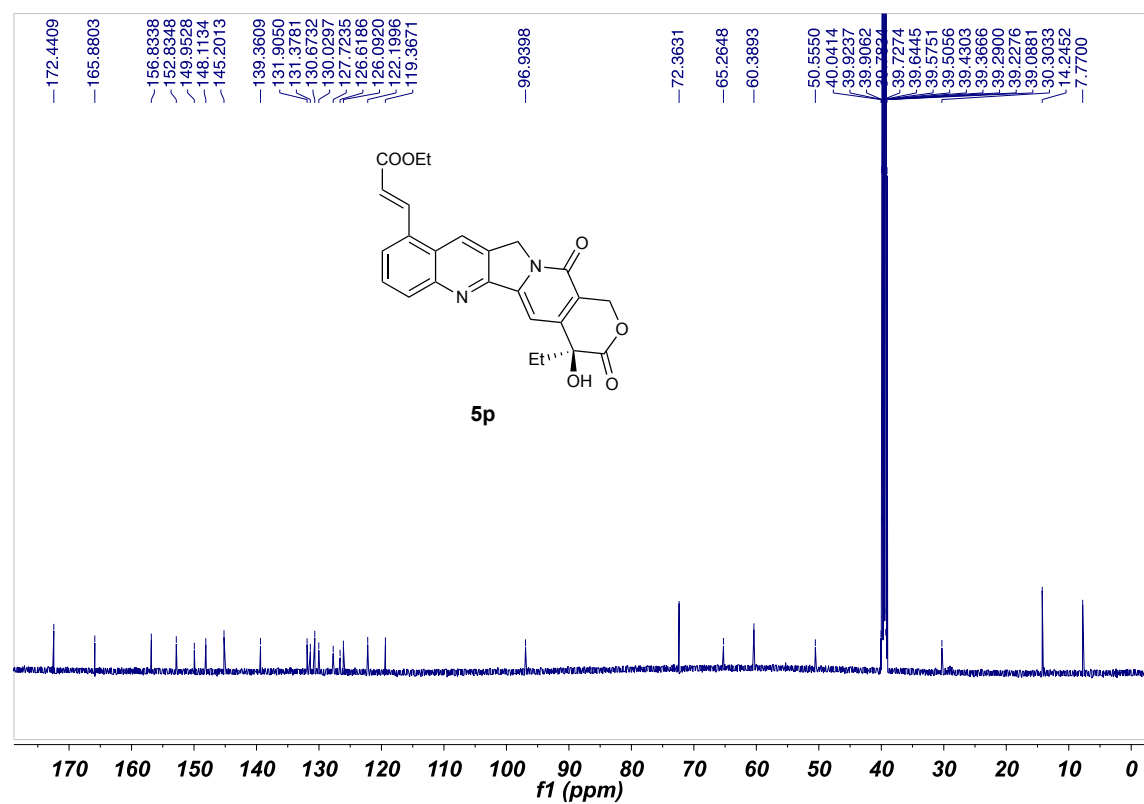

## 2D NOESY of compound **5p**

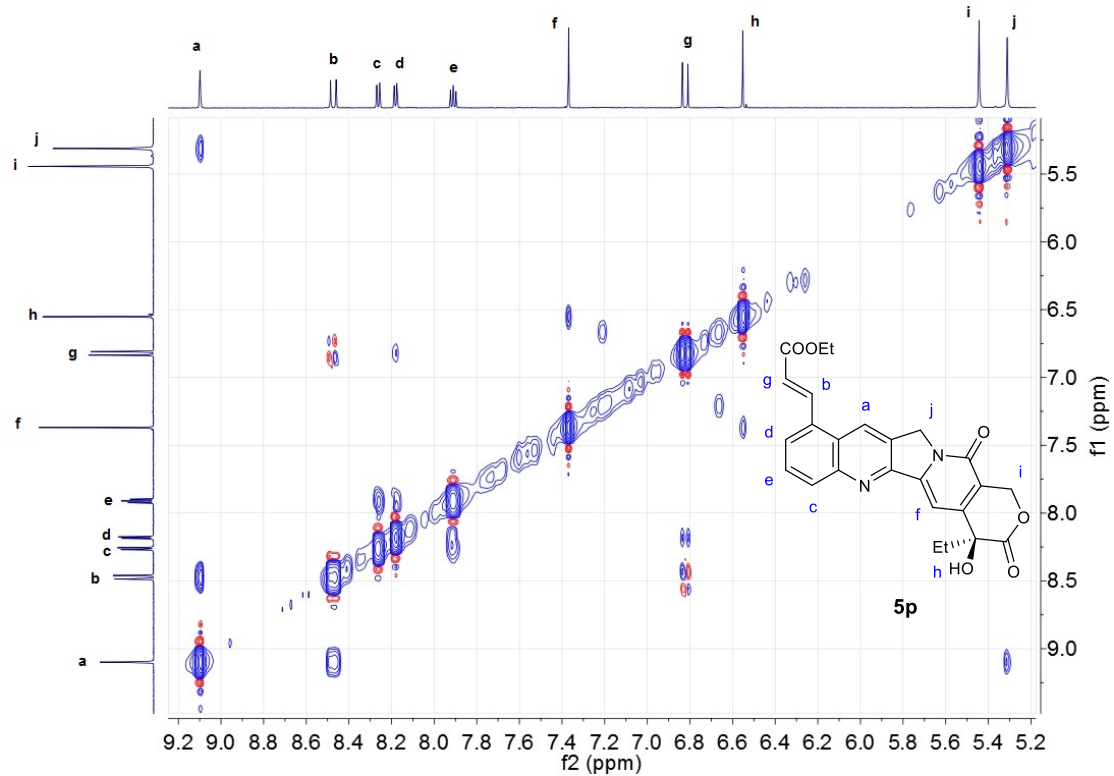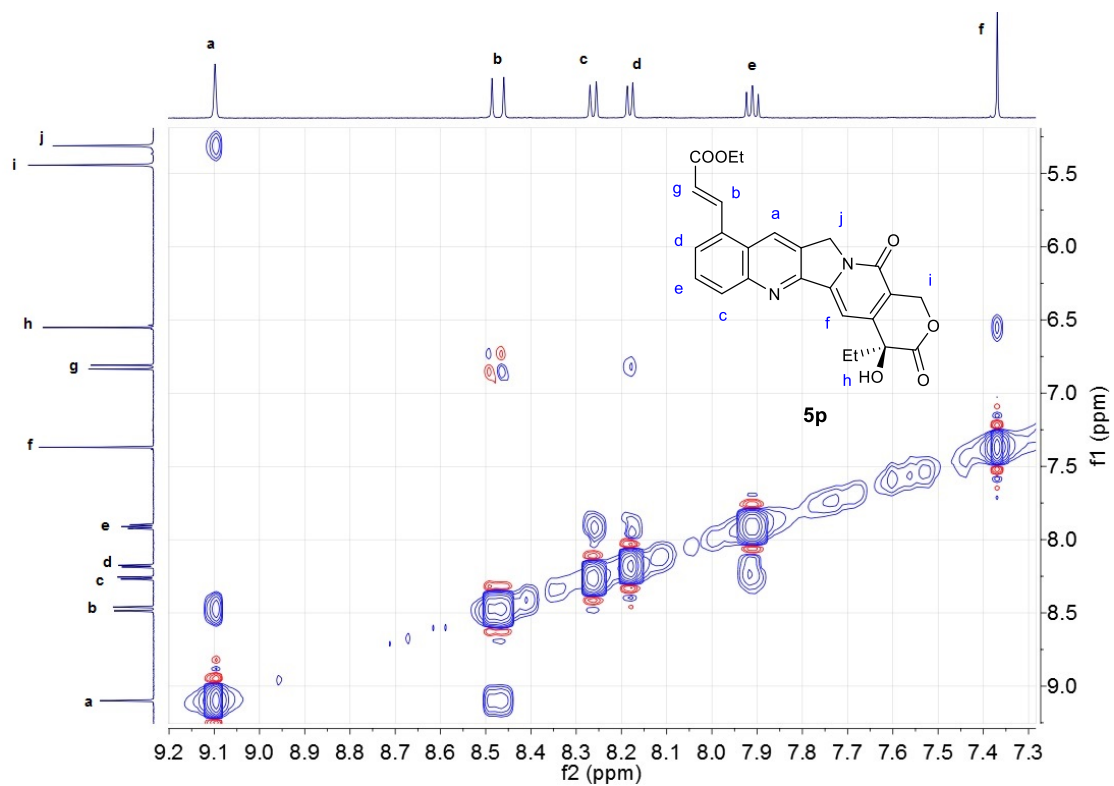

## 10. X-Ray Crystallographic Data

### Experimental Summary

The single crystal X-ray diffraction studies were carried out on a Bruker Kappa APEX-II CCD diffractometer equipped with Mo K<sub>α</sub> radiation ( $\lambda = 0.71073 \text{ \AA}$ ). A 0.217 x 0.183 x 0.155 mm piece of a colorless block was mounted on a Cryoloop with Paratone oil. Data were collected in a nitrogen gas stream at 100(2) K using  $\phi$  and  $\omega$  scans. Crystal-to-detector distance was 40 mm and exposure time was 5 seconds per frame using a scan width of 1.0°. Data collection was 99.8% complete to 25.00° in  $\theta$ . A total of 13470 reflections were collected covering the indices,  $-20 \leq h \leq 20$ ,  $-10 \leq k \leq 10$ ,  $-12 \leq l \leq 18$ . 4124 reflections were found to be symmetry independent, with a  $R_{\text{int}}$  of 0.0336. Indexing and unit cell refinement indicated a C-centered, monoclinic lattice. The space group was found to be C2. The data were integrated using the Bruker SAINT software program and scaled using the SADABS software program. Solution by direct methods (SHELXT) produced a complete phasing model consistent with the proposed structure.

All nonhydrogen atoms were refined anisotropically by full-matrix least-squares (SHELXL-2014). All hydrogen atoms were placed using a riding model. Their positions were constrained relative to their parent atom using the appropriate HFIX command in SHELXL-2014.

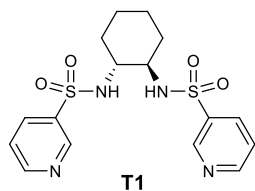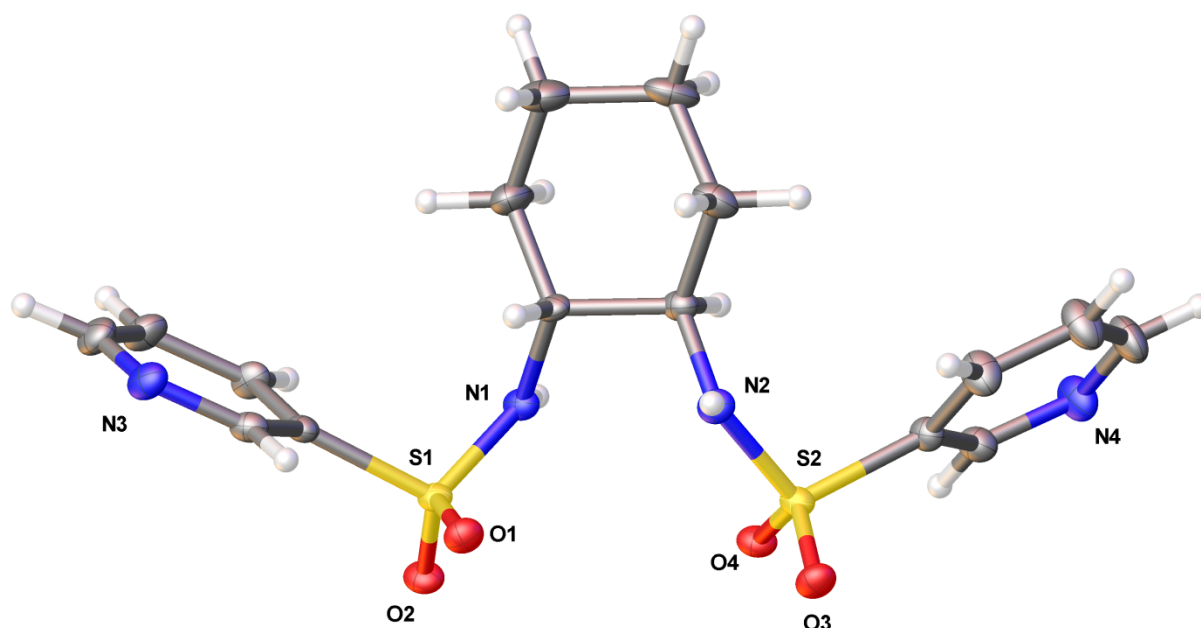

Table S7. Crystal data and structure refinement for Yu38.

|                      |                                                                                                                       |                 |
|----------------------|-----------------------------------------------------------------------------------------------------------------------|-----------------|
| Report date          | 2015-02-20                                                                                                            |                 |
| Identification code  | ZHG-2-16                                                                                                              |                 |
| Empirical formula    | C <sub>16.50</sub> H <sub>21</sub> Cl N <sub>4</sub> O <sub>4</sub> S <sub>2</sub>                                    |                 |
| Molecular formula    | C <sub>16</sub> H <sub>20</sub> N <sub>4</sub> O <sub>4</sub> S <sub>2</sub> , 0.5(C H <sub>2</sub> Cl <sub>2</sub> ) |                 |
| Formula weight       | 438.94                                                                                                                |                 |
| Temperature          | 100 K                                                                                                                 |                 |
| Wavelength           | 0.71073 Å                                                                                                             |                 |
| Crystal system       | Monoclinic                                                                                                            |                 |
| Space group          | C 1 2 1                                                                                                               |                 |
| Unit cell dimensions | a = 16.294(2) Å                                                                                                       | α = 90°.        |
|                      | b = 8.7028(12) Å                                                                                                      | β = 97.723(4)°. |
|                      | c = 14.4268(19) Å                                                                                                     | γ = 90°.        |
| Volume               | 2027.2(5) Å <sup>3</sup>                                                                                              |                 |
| Z                    | 4                                                                                                                     |                 |

|                                   |                                             |
|-----------------------------------|---------------------------------------------|
| Density (calculated)              | 1.438 Mg/m <sup>3</sup>                     |
| Absorption coefficient            | 0.425 mm <sup>-1</sup>                      |
| F(000)                            | 916                                         |
| Crystal size                      | 0.217 x 0.183 x 0.155 mm <sup>3</sup>       |
| Crystal color, habit              | Colorless Block                             |
| Theta range for data collection   | 2.523 to 26.403°.                           |
| Index ranges                      | -20<=h<=20, -10<=k<=10, -12<=l<=18          |
| Reflections collected             | 13470                                       |
| Independent reflections           | 4124 [R(int) = 0.0336]                      |
| Completeness to theta = 25.000°   | 99.8 %                                      |
| Absorption correction             | Semi-empirical from equivalents             |
| Max. and min. transmission        | 0.2602 and 0.2291                           |
| Refinement method                 | Full-matrix least-squares on F <sup>2</sup> |
| Data / restraints / parameters    | 4124 / 3 / 257                              |
| Goodness-of-fit on F <sup>2</sup> | 1.021                                       |
| Final R indices [I>2sigma(I)]     | R1 = 0.0405, wR2 = 0.0918                   |
| R indices (all data)              | R1 = 0.0517, wR2 = 0.0989                   |
| Absolute structure parameter      | 0.06(3)                                     |
| Extinction coefficient            | n/a                                         |
| Largest diff. peak and hole       | 0.606 and -0.909 e.Å <sup>-3</sup>          |



Table S8. Atomic coordinates ( $\times 10^4$ ) and equivalent isotropic displacement parameters ( $\text{\AA}^2 \times 10^3$ ) for Yu38.  $U(\text{eq})$  is defined as one third of the trace of the orthogonalized  $U^{ij}$  tensor.

|        | x       | y        | z       | $U(\text{eq})$ |
|--------|---------|----------|---------|----------------|
| S(1)   | 3889(1) | 4576(1)  | 3259(1) | 15(1)          |
| S(2)   | 6058(1) | 4696(1)  | 1789(1) | 16(1)          |
| O(1)   | 4623(2) | 4035(3)  | 3823(2) | 20(1)          |
| O(2)   | 3364(2) | 3502(3)  | 2699(2) | 20(1)          |
| O(3)   | 6632(2) | 3597(3)  | 2251(2) | 21(1)          |
| O(4)   | 5293(2) | 4160(3)  | 1285(2) | 19(1)          |
| N(1)   | 4101(2) | 5899(4)  | 2573(2) | 16(1)          |
| N(2)   | 5894(2) | 5937(4)  | 2560(2) | 18(1)          |
| N(3)   | 3105(2) | 5964(4)  | 5641(2) | 22(1)          |
| N(4)   | 6660(2) | 6299(5)  | -639(2) | 27(1)          |
| C(1)   | 3281(2) | 5430(4)  | 4057(3) | 15(1)          |
| C(2)   | 2526(3) | 6092(5)  | 3737(3) | 20(1)          |
| C(3)   | 2054(3) | 6681(5)  | 4386(3) | 24(1)          |
| C(4)   | 2365(3) | 6574(5)  | 5326(3) | 25(1)          |
| C(5)   | 3554(3) | 5396(4)  | 5012(3) | 18(1)          |
| C(6)   | 4621(3) | 7215(5)  | 2901(3) | 18(1)          |
| C(7)   | 4111(3) | 8697(5)  | 2802(3) | 27(1)          |
| C(8)   | 4637(3) | 10097(5) | 3116(3) | 34(1)          |
| C(9)   | 5366(3) | 10203(5) | 2560(3) | 30(1)          |
| C(10)  | 5892(3) | 8743(5)  | 2658(3) | 26(1)          |
| C(11)  | 5378(3) | 7307(5)  | 2377(3) | 18(1)          |
| C(12)  | 6570(3) | 5694(5)  | 963(3)  | 18(1)          |
| C(13)  | 7281(3) | 6530(5)  | 1253(3) | 26(1)          |
| C(14)  | 7668(3) | 7261(6)  | 583(3)  | 32(1)          |
| C(15)  | 7343(3) | 7109(6)  | -348(3) | 31(1)          |
| C(16)  | 6277(3) | 5611(5)  | 13(3)   | 21(1)          |
| Cl(1S) | 4117(1) | -166(3)  | -107(1) | 81(1)          |
| C(1S)  | 5000    | 1022(9)  | 0       | 63(3)          |

Table S9. Bond lengths [ $\text{\AA}$ ] and angles [ $^\circ$ ] for Yu38.

---

|            |          |
|------------|----------|
| S(1)-O(1)  | 1.432(3) |
| S(1)-O(2)  | 1.439(3) |
| S(1)-N(1)  | 1.585(3) |
| S(1)-C(1)  | 1.780(4) |
| S(2)-O(3)  | 1.436(3) |
| S(2)-O(4)  | 1.434(3) |
| S(2)-N(2)  | 1.599(3) |
| S(2)-C(12) | 1.772(4) |
| N(1)-H(1)  | 0.89(3)  |
| N(1)-C(6)  | 1.465(5) |
| N(2)-H(2)  | 0.87(2)  |
| N(2)-C(11) | 1.463(5) |
| N(3)-C(4)  | 1.339(6) |
| N(3)-C(5)  | 1.335(5) |
| N(4)-C(15) | 1.336(6) |
| N(4)-C(16) | 1.338(5) |
| C(1)-C(2)  | 1.381(5) |
| C(1)-C(5)  | 1.390(5) |
| C(2)-H(2A) | 0.9500   |
| C(2)-C(3)  | 1.387(6) |
| C(3)-H(3)  | 0.9500   |
| C(3)-C(4)  | 1.385(6) |
| C(4)-H(4)  | 0.9500   |
| C(5)-H(5)  | 0.9500   |
| C(6)-H(6)  | 1.0000   |
| C(6)-C(7)  | 1.529(6) |
| C(6)-C(11) | 1.533(6) |
| C(7)-H(7A) | 0.9900   |
| C(7)-H(7B) | 0.9900   |
| C(7)-C(8)  | 1.523(6) |
| C(8)-H(8A) | 0.9900   |
| C(8)-H(8B) | 0.9900   |
| C(8)-C(9)  | 1.524(7) |
| C(9)-H(9A) | 0.9900   |

|                 |            |
|-----------------|------------|
| C(9)-H(9B)      | 0.9900     |
| C(9)-C(10)      | 1.528(6)   |
| C(10)-H(10A)    | 0.9900     |
| C(10)-H(10B)    | 0.9900     |
| C(10)-C(11)     | 1.529(6)   |
| C(11)-H(11)     | 1.0000     |
| C(12)-C(13)     | 1.383(6)   |
| C(12)-C(16)     | 1.392(5)   |
| C(13)-H(13)     | 0.9500     |
| C(13)-C(14)     | 1.379(6)   |
| C(14)-H(14)     | 0.9500     |
| C(14)-C(15)     | 1.382(6)   |
| C(15)-H(15)     | 0.9500     |
| C(16)-H(16)     | 0.9500     |
| Cl(1S)-C(1S)    | 1.761(5)   |
| C(1S)-Cl(1S)#1  | 1.761(5)   |
| C(1S)-H(1SA)    | 0.9900     |
| C(1S)-H(1SB)    | 0.9900     |
| O(1)-S(1)-O(2)  | 119.53(18) |
| O(1)-S(1)-N(1)  | 110.98(18) |
| O(1)-S(1)-C(1)  | 105.33(17) |
| O(2)-S(1)-N(1)  | 106.52(17) |
| O(2)-S(1)-C(1)  | 107.08(18) |
| N(1)-S(1)-C(1)  | 106.68(18) |
| O(3)-S(2)-N(2)  | 106.63(17) |
| O(3)-S(2)-C(12) | 107.64(18) |
| O(4)-S(2)-O(3)  | 119.06(18) |
| O(4)-S(2)-N(2)  | 110.93(17) |
| O(4)-S(2)-C(12) | 105.90(18) |
| N(2)-S(2)-C(12) | 105.92(18) |
| S(1)-N(1)-H(1)  | 121(4)     |
| C(6)-N(1)-S(1)  | 122.1(3)   |
| C(6)-N(1)-H(1)  | 114(4)     |
| S(2)-N(2)-H(2)  | 116(3)     |
| C(11)-N(2)-S(2) | 124.8(3)   |

|                  |          |
|------------------|----------|
| C(11)-N(2)-H(2)  | 116(3)   |
| C(5)-N(3)-C(4)   | 117.8(3) |
| C(15)-N(4)-C(16) | 117.5(4) |
| C(2)-C(1)-S(1)   | 120.4(3) |
| C(2)-C(1)-C(5)   | 119.5(4) |
| C(5)-C(1)-S(1)   | 120.0(3) |
| C(1)-C(2)-H(2A)  | 120.7    |
| C(1)-C(2)-C(3)   | 118.5(4) |
| C(3)-C(2)-H(2A)  | 120.7    |
| C(2)-C(3)-H(3)   | 120.9    |
| C(4)-C(3)-C(2)   | 118.2(4) |
| C(4)-C(3)-H(3)   | 120.9    |
| N(3)-C(4)-C(3)   | 123.6(4) |
| N(3)-C(4)-H(4)   | 118.2    |
| C(3)-C(4)-H(4)   | 118.2    |
| N(3)-C(5)-C(1)   | 122.3(4) |
| N(3)-C(5)-H(5)   | 118.9    |
| C(1)-C(5)-H(5)   | 118.9    |
| N(1)-C(6)-H(6)   | 108.0    |
| N(1)-C(6)-C(7)   | 110.2(3) |
| N(1)-C(6)-C(11)  | 110.5(3) |
| C(7)-C(6)-H(6)   | 108.0    |
| C(7)-C(6)-C(11)  | 111.9(3) |
| C(11)-C(6)-H(6)  | 108.0    |
| C(6)-C(7)-H(7A)  | 109.3    |
| C(6)-C(7)-H(7B)  | 109.3    |
| H(7A)-C(7)-H(7B) | 107.9    |
| C(8)-C(7)-C(6)   | 111.7(4) |
| C(8)-C(7)-H(7A)  | 109.3    |
| C(8)-C(7)-H(7B)  | 109.3    |
| C(7)-C(8)-H(8A)  | 109.7    |
| C(7)-C(8)-H(8B)  | 109.7    |
| C(7)-C(8)-C(9)   | 109.8(4) |
| H(8A)-C(8)-H(8B) | 108.2    |
| C(9)-C(8)-H(8A)  | 109.7    |
| C(9)-C(8)-H(8B)  | 109.7    |

|                       |          |
|-----------------------|----------|
| C(8)-C(9)-H(9A)       | 109.3    |
| C(8)-C(9)-H(9B)       | 109.3    |
| C(8)-C(9)-C(10)       | 111.6(4) |
| H(9A)-C(9)-H(9B)      | 108.0    |
| C(10)-C(9)-H(9A)      | 109.3    |
| C(10)-C(9)-H(9B)      | 109.3    |
| C(9)-C(10)-H(10A)     | 109.2    |
| C(9)-C(10)-H(10B)     | 109.2    |
| C(9)-C(10)-C(11)      | 112.0(4) |
| H(10A)-C(10)-H(10B)   | 107.9    |
| C(11)-C(10)-H(10A)    | 109.2    |
| C(11)-C(10)-H(10B)    | 109.2    |
| N(2)-C(11)-C(6)       | 110.5(3) |
| N(2)-C(11)-C(10)      | 109.7(3) |
| N(2)-C(11)-H(11)      | 108.5    |
| C(6)-C(11)-H(11)      | 108.5    |
| C(10)-C(11)-C(6)      | 111.1(3) |
| C(10)-C(11)-H(11)     | 108.5    |
| C(13)-C(12)-S(2)      | 120.3(3) |
| C(13)-C(12)-C(16)     | 119.2(4) |
| C(16)-C(12)-S(2)      | 120.4(3) |
| C(12)-C(13)-H(13)     | 120.9    |
| C(14)-C(13)-C(12)     | 118.2(4) |
| C(14)-C(13)-H(13)     | 120.9    |
| C(13)-C(14)-H(14)     | 120.5    |
| C(13)-C(14)-C(15)     | 119.1(4) |
| C(15)-C(14)-H(14)     | 120.5    |
| N(4)-C(15)-C(14)      | 123.4(4) |
| N(4)-C(15)-H(15)      | 118.3    |
| C(14)-C(15)-H(15)     | 118.3    |
| N(4)-C(16)-C(12)      | 122.5(4) |
| N(4)-C(16)-H(16)      | 118.7    |
| C(12)-C(16)-H(16)     | 118.7    |
| Cl(1S)-C(1S)-Cl(1S)#1 | 108.1(4) |
| Cl(1S)-C(1S)-H(1SA)   | 110.1    |
| Cl(1S)#1-C(1S)-H(1SA) | 110.1    |

|                       |       |
|-----------------------|-------|
| Cl(1S)#1-C(1S)-H(1SB) | 110.1 |
| Cl(1S)-C(1S)-H(1SB)   | 110.1 |
| H(1SA)-C(1S)-H(1SB)   | 108.4 |

---

Symmetry transformations used to generate equivalent atoms:

#1 -x+1,y,-z

Table S10. Anisotropic displacement parameters ( $\text{\AA}^2 \times 10^3$ ) for Yu38. The anisotropic displacement factor exponent takes the form:  $-2\pi^2 [ h^2 a^{*2} U^{11} + \dots + 2 h k a^* b^* U^{12} ]$

|      | U <sup>11</sup> | U <sup>22</sup> | U <sup>33</sup> | U <sup>23</sup> | U <sup>13</sup> | U <sup>12</sup> |
|------|-----------------|-----------------|-----------------|-----------------|-----------------|-----------------|
| S(1) | 20(1)           | 13(1)           | 12(1)           | -2(1)           | 0(1)            | 0(1)            |
| S(2) | 21(1)           | 14(1)           | 11(1)           | 0(1)            | 0(1)            | -1(1)           |
| O(1) | 22(2)           | 19(1)           | 18(2)           | 1(1)            | -1(1)           | 4(1)            |
| O(2) | 27(2)           | 17(2)           | 16(1)           | -4(1)           | 0(1)            | -4(1)           |
| O(3) | 26(2)           | 19(2)           | 18(2)           | 2(1)            | 1(1)            | 6(1)            |
| O(4) | 23(2)           | 16(1)           | 16(1)           | -2(1)           | -2(1)           | -3(1)           |
| N(1) | 22(2)           | 16(2)           | 10(2)           | -1(1)           | -1(1)           | 0(1)            |
| N(2) | 22(2)           | 19(2)           | 10(2)           | -1(1)           | -2(1)           | 0(2)            |
| N(3) | 31(2)           | 22(2)           | 13(2)           | -2(2)           | 2(2)            | 4(2)            |
| N(4) | 36(2)           | 32(2)           | 12(2)           | -1(2)           | 3(2)            | -8(2)           |
| C(1) | 20(2)           | 12(2)           | 14(2)           | 0(2)            | 2(2)            | -2(2)           |
| C(2) | 25(2)           | 22(2)           | 11(2)           | 2(2)            | -2(2)           | 5(2)            |
| C(3) | 28(2)           | 22(2)           | 23(2)           | -2(2)           | 0(2)            | 8(2)            |
| C(4) | 34(3)           | 23(2)           | 20(2)           | -5(2)           | 8(2)            | 5(2)            |
| C(5) | 24(2)           | 14(2)           | 14(2)           | 0(2)            | -1(2)           | 0(2)            |
| C(6) | 26(2)           | 12(2)           | 14(2)           | -3(2)           | 3(2)            | 0(2)            |
| C(7) | 30(2)           | 18(2)           | 34(3)           | -3(2)           | 9(2)            | 3(2)            |
| C(8) | 45(3)           | 17(2)           | 39(3)           | -4(2)           | 2(2)            | 2(2)            |
| C(9) | 38(3)           | 14(2)           | 36(3)           | 5(2)            | -5(2)           | -5(2)           |

|        |        |        |       |        |        |        |
|--------|--------|--------|-------|--------|--------|--------|
| C(10)  | 33(3)  | 19(2)  | 24(2) | 4(2)   | 0(2)   | -5(2)  |
| C(11)  | 25(2)  | 15(2)  | 14(2) | 0(2)   | 2(2)   | 0(2)   |
| C(12)  | 23(2)  | 18(2)  | 12(2) | 0(2)   | 1(2)   | -1(2)  |
| C(13)  | 29(2)  | 33(2)  | 15(2) | -4(2)  | 0(2)   | -9(2)  |
| C(14)  | 34(3)  | 39(3)  | 23(2) | -1(2)  | 3(2)   | -16(2) |
| C(15)  | 39(3)  | 34(3)  | 20(2) | 3(2)   | 9(2)   | -14(2) |
| C(16)  | 26(2)  | 19(2)  | 17(2) | 0(2)   | 1(2)   | -3(2)  |
| Cl(1S) | 55(1)  | 132(2) | 56(1) | -28(1) | 10(1)  | 4(1)   |
| C(1S)  | 128(9) | 20(4)  | 31(4) | 0      | -20(5) | 0      |

---

Table S11. Hydrogen coordinates ( $\times 10^4$ ) and isotropic displacement parameters ( $\text{\AA}^2 \times 10^{-3}$ ) for Yu38.

|        | x        | y        | z        | U(eq)  |
|--------|----------|----------|----------|--------|
| H(1)   | 3800(30) | 6040(70) | 2020(30) | 58(18) |
| H(2)   | 6260(20) | 5950(50) | 3060(20) | 25(13) |
| H(2A)  | 2333     | 6142     | 3086     | 24     |
| H(3)   | 1532     | 7146     | 4191     | 29     |
| H(4)   | 2036     | 6953     | 5771     | 30     |
| H(5)   | 4079     | 4953     | 5224     | 21     |
| H(6)   | 4823     | 7059     | 3580     | 21     |
| H(7A)  | 3868     | 8829     | 2140     | 32     |
| H(7B)  | 3651     | 8615     | 3182     | 32     |
| H(8A)  | 4843     | 10013    | 3792     | 41     |
| H(8B)  | 4295     | 11038    | 3018     | 41     |
| H(9A)  | 5715     | 11094    | 2784     | 36     |
| H(9B)  | 5156     | 10373    | 1892     | 36     |
| H(10A) | 6154     | 8639     | 3315     | 31     |
| H(10B) | 6339     | 8832     | 2260     | 31     |
| H(11)  | 5180     | 7360     | 1691     | 22     |
| H(13)  | 7496     | 6598     | 1897     | 31     |
| H(14)  | 8151     | 7861     | 758      | 38     |
| H(15)  | 7619     | 7606     | -804     | 37     |
| H(16)  | 5786     | 5043     | -180     | 25     |
| H(1SA) | 5013     | 1687     | 558      | 75     |
| H(1SB) | 4987     | 1687     | -558     | 75     |



Table S12. Hydrogen bonds for Yu38 [ $\text{\AA}$  and  $^\circ$ ].

| D-H...A            | d(D-H)  | d(H...A) | d(D...A) | $\angle(\text{DHA})$ |
|--------------------|---------|----------|----------|----------------------|
| N(1)-H(1)...N(4)#1 | 0.89(3) | 2.04(3)  | 2.918(5) | 167(5)               |
| N(2)-H(2)...N(3)#2 | 0.87(2) | 2.02(3)  | 2.873(5) | 168(4)               |

Symmetry transformations used to generate equivalent atoms:

#1  $-x+1, y, -z$  #2  $-x+1, y, -z+1$

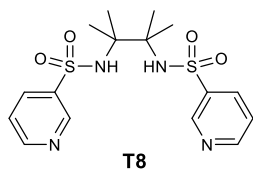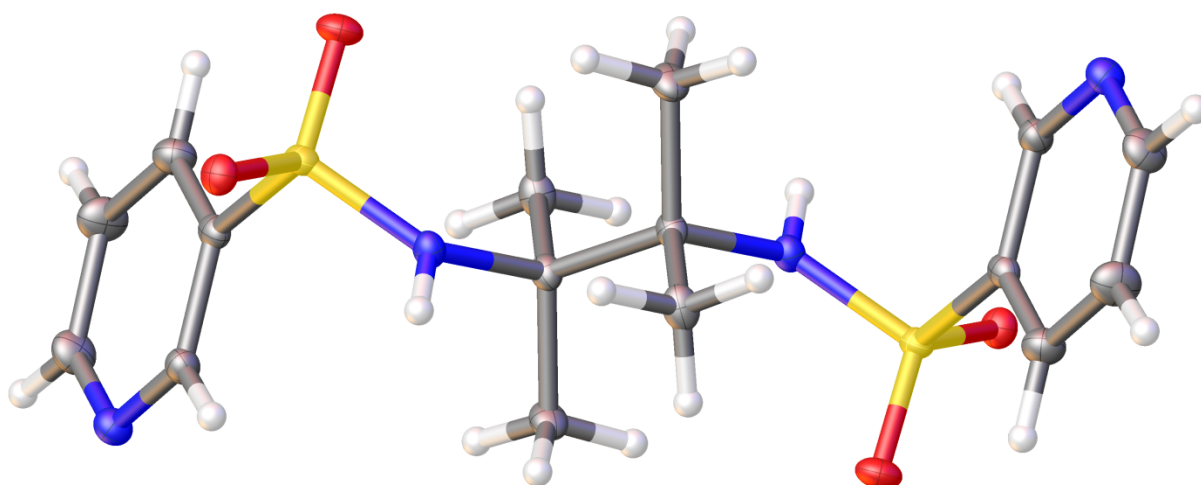

Table S13. Crystal data and structure refinement for yu50.

|                                   |                                                                              |                 |
|-----------------------------------|------------------------------------------------------------------------------|-----------------|
| Identification code               | yu50                                                                         |                 |
| Empirical formula                 | C <sub>16</sub> H <sub>22</sub> N <sub>4</sub> O <sub>4</sub> S <sub>2</sub> |                 |
| Formula weight                    | 398.49                                                                       |                 |
| Temperature                       | 100.0 K                                                                      |                 |
| Wavelength                        | 0.71073 Å                                                                    |                 |
| Crystal system                    | Monoclinic                                                                   |                 |
| Space group                       | P 2 <sub>1</sub> /n                                                          |                 |
| Unit cell dimensions              | a = 10.4117(10) Å                                                            | α = 90°.        |
|                                   | b = 6.0842(5) Å                                                              | β = 94.632(5)°. |
|                                   | c = 14.2796(13) Å                                                            | γ = 90°.        |
| Volume                            | 901.61(14) Å <sup>3</sup>                                                    |                 |
| Z                                 | 2                                                                            |                 |
| Density (calculated)              | 1.468 Mg/m <sup>3</sup>                                                      |                 |
| Absorption coefficient            | 0.326 mm <sup>-1</sup>                                                       |                 |
| F(000)                            | 420                                                                          |                 |
| Crystal size                      | 0.34 x 0.3 x 0.24 mm <sup>3</sup>                                            |                 |
| Theta range for data collection   | 2.334 to 28.329°.                                                            |                 |
| Index ranges                      | -10 ≤ h ≤ 13, -7 ≤ k ≤ 8, -19 ≤ l ≤ 15                                       |                 |
| Reflections collected             | 6520                                                                         |                 |
| Independent reflections           | 2228 [R(int) = 0.0370]                                                       |                 |
| Completeness to theta = 25.242°   | 99.6 %                                                                       |                 |
| Absorption correction             | Semi-empirical from equivalents                                              |                 |
| Max. and min. transmission        | 0.1525 and 0.1227                                                            |                 |
| Refinement method                 | Full-matrix least-squares on F <sup>2</sup>                                  |                 |
| Data / restraints / parameters    | 2228 / 0 / 124                                                               |                 |
| Goodness-of-fit on F <sup>2</sup> | 1.096                                                                        |                 |
| Final R indices [I > 2σ(I)]       | R1 = 0.0364, wR2 = 0.1009                                                    |                 |

R indices (all data)  
Extinction coefficient  
Largest diff. peak and hole

$R1 = 0.0392$ ,  $wR2 = 0.1030$   
n/a  
 $0.476$  and  $-0.389 \text{ e.}\text{\AA}^{-3}$

Table S14. Atomic coordinates ( $\times 10^4$ ) and equivalent isotropic displacement parameters ( $\text{\AA}^2 \times 10^3$ ) for yu50.  $U(\text{eq})$  is defined as one third of the trace of the orthogonalized  $U^{ij}$  tensor.

|      | x        | y       | z       | $U(\text{eq})$ |
|------|----------|---------|---------|----------------|
| S(1) | -96(1)   | 7356(1) | 2040(1) | 13(1)          |
| O(1) | 655(1)   | 9241(2) | 2351(1) | 16(1)          |
| O(2) | -1464(1) | 7578(2) | 1866(1) | 19(1)          |
| N(1) | 1714(1)  | 3077(2) | 3819(1) | 17(1)          |
| N(2) | 530(1)   | 6489(2) | 1117(1) | 14(1)          |
| C(1) | 743(2)   | 2371(3) | 4303(1) | 21(1)          |
| C(2) | 1420(2)  | 4544(3) | 3137(1) | 15(1)          |
| C(3) | 173(1)   | 5331(2) | 2927(1) | 13(1)          |
| C(4) | 149(1)   | 4549(2) | 516(1)  | 13(1)          |
| C(5) | -519(2)  | 3047(3) | 4129(1) | 22(1)          |
| C(6) | -823(2)  | 4575(3) | 3423(1) | 18(1)          |
| C(7) | -1020(2) | 3337(3) | 855(1)  | 17(1)          |
| C(8) | 1297(2)  | 2969(3) | 579(1)  | 18(1)          |

Table S15. Bond lengths [ $\text{\AA}$ ] and angles [ $^\circ$ ] for *yu50*.

---

|                |            |
|----------------|------------|
| S(1)-O(1)      | 1.4383(11) |
| S(1)-O(2)      | 1.4327(12) |
| S(1)-N(2)      | 1.6056(13) |
| S(1)-C(3)      | 1.7734(15) |
| N(1)-C(1)      | 1.341(2)   |
| N(1)-C(2)      | 1.338(2)   |
| N(2)-C(4)      | 1.4945(19) |
| N(2)-H(2)      | 0.82(2)    |
| C(1)-H(1)      | 0.9500     |
| C(1)-C(5)      | 1.381(2)   |
| C(2)-H(2A)     | 0.9500     |
| C(2)-C(3)      | 1.393(2)   |
| C(3)-C(6)      | 1.380(2)   |
| C(4)-C(4)#1    | 1.579(3)   |
| C(4)-C(7)      | 1.534(2)   |
| C(4)-C(8)      | 1.531(2)   |
| C(5)-H(5)      | 0.9500     |
| C(5)-C(6)      | 1.389(2)   |
| C(6)-H(6)      | 0.9500     |
| C(7)-H(7A)     | 0.9800     |
| C(7)-H(7B)     | 0.9800     |
| C(7)-H(7C)     | 0.9800     |
| C(8)-H(8A)     | 0.9800     |
| C(8)-H(8B)     | 0.9800     |
| C(8)-H(8C)     | 0.9800     |
| O(1)-S(1)-N(2) | 105.59(7)  |
| O(1)-S(1)-C(3) | 106.45(7)  |
| O(2)-S(1)-O(1) | 119.10(7)  |
| O(2)-S(1)-N(2) | 110.62(7)  |
| O(2)-S(1)-C(3) | 106.70(7)  |
| N(2)-S(1)-C(3) | 107.89(7)  |
| C(2)-N(1)-C(1) | 116.82(14) |
| S(1)-N(2)-H(2) | 112.9(16)  |

|                  |            |
|------------------|------------|
| C(4)-N(2)-S(1)   | 128.64(11) |
| C(4)-N(2)-H(2)   | 114.5(16)  |
| N(1)-C(1)-H(1)   | 118.0      |
| N(1)-C(1)-C(5)   | 123.96(15) |
| C(5)-C(1)-H(1)   | 118.0      |
| N(1)-C(2)-H(2A)  | 118.7      |
| N(1)-C(2)-C(3)   | 122.69(14) |
| C(3)-C(2)-H(2A)  | 118.7      |
| C(2)-C(3)-S(1)   | 118.87(12) |
| C(6)-C(3)-S(1)   | 121.06(12) |
| C(6)-C(3)-C(2)   | 120.05(14) |
| N(2)-C(4)-C(4)#1 | 106.50(14) |
| N(2)-C(4)-C(7)   | 112.27(12) |
| N(2)-C(4)-C(8)   | 106.96(12) |
| C(7)-C(4)-C(4)#1 | 111.16(15) |
| C(8)-C(4)-C(4)#1 | 111.53(15) |
| C(8)-C(4)-C(7)   | 108.37(12) |
| C(1)-C(5)-H(5)   | 120.4      |
| C(1)-C(5)-C(6)   | 119.16(15) |
| C(6)-C(5)-H(5)   | 120.4      |
| C(3)-C(6)-C(5)   | 117.31(15) |
| C(3)-C(6)-H(6)   | 121.3      |
| C(5)-C(6)-H(6)   | 121.3      |
| C(4)-C(7)-H(7A)  | 109.5      |
| C(4)-C(7)-H(7B)  | 109.5      |
| C(4)-C(7)-H(7C)  | 109.5      |
| H(7A)-C(7)-H(7B) | 109.5      |
| H(7A)-C(7)-H(7C) | 109.5      |
| H(7B)-C(7)-H(7C) | 109.5      |
| C(4)-C(8)-H(8A)  | 109.5      |
| C(4)-C(8)-H(8B)  | 109.5      |
| C(4)-C(8)-H(8C)  | 109.5      |
| H(8A)-C(8)-H(8B) | 109.5      |
| H(8A)-C(8)-H(8C) | 109.5      |
| H(8B)-C(8)-H(8C) | 109.5      |

Symmetry transformations used to generate equivalent atoms:

#1  $-x, -y+1, -z$

Table S16. Anisotropic displacement parameters ( $\text{\AA}^2 \times 10^3$ ) for yu50. The anisotropic displacement factor exponent takes the form:  $-2\pi^2 [ h^2 a^{*2} U^{11} + \dots + 2 h k a^* b^* U^{12} ]$

|      | U <sup>11</sup> | U <sup>22</sup> | U <sup>33</sup> | U <sup>23</sup> | U <sup>13</sup> | U <sup>12</sup> |
|------|-----------------|-----------------|-----------------|-----------------|-----------------|-----------------|
| S(1) | 12(1)           | 12(1)           | 14(1)           | 0(1)            | 0(1)            | 1(1)            |
| O(1) | 18(1)           | 13(1)           | 18(1)           | -2(1)           | 1(1)            | -2(1)           |
| O(2) | 12(1)           | 20(1)           | 23(1)           | 2(1)            | -1(1)           | 4(1)            |
| N(1) | 16(1)           | 16(1)           | 18(1)           | 1(1)            | -1(1)           | 0(1)            |
| N(2) | 13(1)           | 14(1)           | 14(1)           | -2(1)           | 0(1)            | -3(1)           |
| C(1) | 22(1)           | 20(1)           | 20(1)           | 7(1)            | 1(1)            | 0(1)            |
| C(2) | 14(1)           | 16(1)           | 14(1)           | 0(1)            | 0(1)            | -1(1)           |
| C(3) | 14(1)           | 13(1)           | 13(1)           | -1(1)           | -1(1)           | -1(1)           |
| C(4) | 15(1)           | 10(1)           | 13(1)           | 0(1)            | -1(1)           | -1(1)           |
| C(5) | 20(1)           | 23(1)           | 25(1)           | 7(1)            | 7(1)            | -3(1)           |
| C(6) | 15(1)           | 19(1)           | 21(1)           | 1(1)            | 2(1)            | 0(1)            |
| C(7) | 20(1)           | 16(1)           | 15(1)           | 1(1)            | -1(1)           | -6(1)           |
| C(8) | 22(1)           | 14(1)           | 18(1)           | 1(1)            | -3(1)           | 4(1)            |



Table S17. Hydrogen coordinates ( $\times 10^4$ ) and isotropic displacement parameters ( $\text{\AA}^2 \times 10^{-3}$ ) for yu50.

|       | x        | y        | z        | U(eq) |
|-------|----------|----------|----------|-------|
| H(1)  | 936      | 1344     | 4795     | 25    |
| H(2A) | 2089     | 5071     | 2781     | 18    |
| H(5)  | -1172    | 2473     | 4488     | 27    |
| H(6)  | -1681    | 5080     | 3287     | 22    |
| H(7A) | -808     | 2783     | 1493     | 26    |
| H(7B) | -1248    | 2102     | 433      | 26    |
| H(7C) | -1751    | 4351     | 855      | 26    |
| H(8A) | 2085     | 3782     | 472      | 27    |
| H(8B) | 1155     | 1819     | 102      | 27    |
| H(8C) | 1387     | 2296     | 1205     | 27    |
| H(2)  | 1280(20) | 6880(40) | 1095(16) | 25(6) |

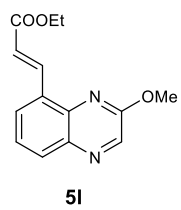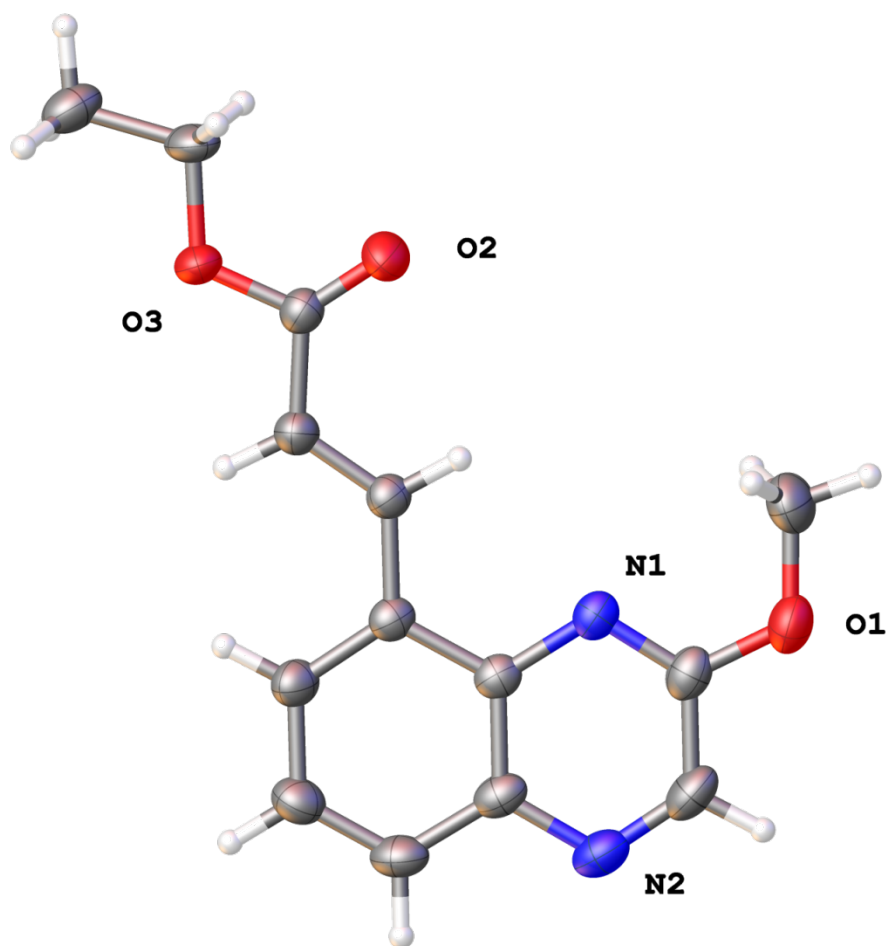

Table S18. Crystal data and structure refinement for Yu83.

|                                   |                                             |                             |
|-----------------------------------|---------------------------------------------|-----------------------------|
| Report date                       | 2016-11-16                                  |                             |
| Identification code               | yu83                                        |                             |
| Empirical formula                 | C14 H14 N2 O3                               |                             |
| Molecular formula                 | C14 H14 N2 O3                               |                             |
| Formula weight                    | 258.27                                      |                             |
| Temperature                       | 100.0 K                                     |                             |
| Wavelength                        | 0.71073 Å                                   |                             |
| Crystal system                    | Monoclinic                                  |                             |
| Space group                       | P 1 21/c 1                                  |                             |
| Unit cell dimensions              | a = 4.5660(3) Å                             | $\alpha = 90^\circ$ .       |
|                                   | b = 26.0435(11) Å                           | $\beta = 91.036(2)^\circ$ . |
|                                   | c = 10.8149(5) Å                            | $\gamma = 90^\circ$ .       |
| Volume                            | 1285.84(12) Å <sup>3</sup>                  |                             |
| Z                                 | 4                                           |                             |
| Density (calculated)              | 1.334 Mg/m <sup>3</sup>                     |                             |
| Absorption coefficient            | 0.095 mm <sup>-1</sup>                      |                             |
| F(000)                            | 544                                         |                             |
| Crystal size                      | 0.22 x 0.08 x 0.08 mm <sup>3</sup>          |                             |
| Crystal color, habit              | colorless needle                            |                             |
| Theta range for data collection   | 1.564 to 25.347°.                           |                             |
| Index ranges                      | -5 ≤ h ≤ 5, -31 ≤ k ≤ 25, -12 ≤ l ≤ 13      |                             |
| Reflections collected             | 9029                                        |                             |
| Independent reflections           | 2354 [R(int) = 0.0274]                      |                             |
| Completeness to theta = 25.242°   | 99.6 %                                      |                             |
| Absorption correction             | Semi-empirical from equivalents             |                             |
| Max. and min. transmission        | 0.6463 and 0.6125                           |                             |
| Refinement method                 | Full-matrix least-squares on F <sup>2</sup> |                             |
| Data / restraints / parameters    | 2354 / 0 / 174                              |                             |
| Goodness-of-fit on F <sup>2</sup> | 1.038                                       |                             |
| Final R indices [I > 2σ(I)]       | R1 = 0.0444, wR2 = 0.0990                   |                             |
| R indices (all data)              | R1 = 0.0607, wR2 = 0.1065                   |                             |
| Extinction coefficient            | n/a                                         |                             |
| Largest diff. peak and hole       | 0.151 and -0.175 e.Å <sup>-3</sup>          |                             |

Table S19. Atomic coordinates ( $\times 10^4$ ) and equivalent isotropic displacement parameters ( $\text{\AA}^2 \times 10^3$ ) for Yu83.  $U(\text{eq})$  is defined as one third of the trace of the orthogonalized  $U^{ij}$  tensor.

|       | x        | y       | z       | $U(\text{eq})$ |
|-------|----------|---------|---------|----------------|
| O(3)  | 9390(3)  | 6042(1) | 1371(1) | 40(1)          |
| O(1)  | -2599(3) | 5798(1) | 6904(1) | 47(1)          |
| O(2)  | 6637(3)  | 5501(1) | 2472(1) | 48(1)          |
| N(1)  | 688(3)   | 6272(1) | 5776(1) | 32(1)          |
| N(2)  | -861(4)  | 7117(1) | 7280(2) | 42(1)          |
| C(4)  | 1152(4)  | 7170(1) | 6357(2) | 35(1)          |
| C(11) | 6729(4)  | 6393(1) | 2967(2) | 34(1)          |
| C(14) | 12273(5) | 5822(1) | -358(2) | 49(1)          |
| C(2)  | -1230(4) | 6241(1) | 6645(2) | 36(1)          |
| C(3)  | -2026(5) | 6666(1) | 7396(2) | 44(1)          |
| C(7)  | 5181(4)  | 7302(1) | 4500(2) | 36(1)          |
| C(8)  | 3985(4)  | 6818(1) | 4644(2) | 30(1)          |
| C(5)  | 2454(4)  | 7650(1) | 6175(2) | 41(1)          |
| C(9)  | 1909(4)  | 6748(1) | 5599(2) | 29(1)          |
| C(13) | 10356(5) | 5610(1) | 631(2)  | 42(1)          |
| C(12) | 7516(4)  | 5929(1) | 2283(2) | 32(1)          |
| C(1)  | -1833(5) | 5360(1) | 6163(2) | 54(1)          |
| C(10) | 4819(4)  | 6382(1) | 3875(2) | 31(1)          |
| C(6)  | 4440(5)  | 7714(1) | 5262(2) | 42(1)          |

Table S20. Bond lengths [Å] and angles [°] for Yu83.

|              |          |                     |            |
|--------------|----------|---------------------|------------|
| O(3)-C(13)   | 1.453(2) |                     |            |
| O(3)-C(12)   | 1.349(2) | C(12)-O(3)-C(13)    | 116.00(15) |
| O(1)-C(2)    | 1.343(2) | C(2)-O(1)-C(1)      | 116.45(16) |
| O(1)-C(1)    | 1.441(3) | C(2)-N(1)-C(9)      | 115.92(16) |
| O(2)-C(12)   | 1.205(2) | C(3)-N(2)-C(4)      | 116.23(17) |
| N(1)-C(2)    | 1.299(2) | N(2)-C(4)-C(5)      | 118.83(17) |
| N(1)-C(9)    | 1.376(2) | N(2)-C(4)-C(9)      | 121.01(18) |
| N(2)-C(4)    | 1.376(3) | C(5)-C(4)-C(9)      | 120.16(18) |
| N(2)-C(3)    | 1.296(3) | C(12)-C(11)-H(11)   | 119.1      |
| C(4)-C(5)    | 1.401(3) | C(10)-C(11)-H(11)   | 119.1      |
| C(4)-C(9)    | 1.417(3) | C(10)-C(11)-C(12)   | 121.84(17) |
| C(11)-H(11)  | 0.9500   | H(14A)-C(14)-H(14B) | 109.5      |
| C(11)-C(12)  | 1.464(3) | H(14A)-C(14)-H(14C) | 109.5      |
| C(11)-C(10)  | 1.325(3) | H(14B)-C(14)-H(14C) | 109.5      |
| C(14)-H(14A) | 0.9800   | C(13)-C(14)-H(14A)  | 109.5      |
| C(14)-H(14B) | 0.9800   | C(13)-C(14)-H(14B)  | 109.5      |
| C(14)-H(14C) | 0.9800   | C(13)-C(14)-H(14C)  | 109.5      |
| C(14)-C(13)  | 1.500(3) | O(1)-C(2)-C(3)      | 115.10(18) |
| C(2)-C(3)    | 1.425(3) | N(1)-C(2)-O(1)      | 121.79(18) |
| C(3)-H(3)    | 0.9500   | N(1)-C(2)-C(3)      | 123.11(19) |
| C(7)-H(7)    | 0.9500   | N(2)-C(3)-C(2)      | 122.68(19) |
| C(7)-C(8)    | 1.384(3) | N(2)-C(3)-H(3)      | 118.7      |
| C(7)-C(6)    | 1.398(3) | C(2)-C(3)-H(3)      | 118.7      |
| C(8)-C(9)    | 1.426(3) | C(8)-C(7)-H(7)      | 118.9      |
| C(8)-C(10)   | 1.462(2) | C(8)-C(7)-C(6)      | 122.15(19) |
| C(5)-H(5)    | 0.9500   | C(6)-C(7)-H(7)      | 118.9      |
| C(5)-C(6)    | 1.363(3) | C(7)-C(8)-C(9)      | 117.81(16) |
| C(13)-H(13A) | 0.9900   | C(7)-C(8)-C(10)     | 122.38(17) |
| C(13)-H(13B) | 0.9900   | C(9)-C(8)-C(10)     | 119.80(16) |
| C(1)-H(1A)   | 0.9800   | C(4)-C(5)-H(5)      | 120.0      |
| C(1)-H(1B)   | 0.9800   | C(6)-C(5)-C(4)      | 120.02(18) |
| C(1)-H(1C)   | 0.9800   | C(6)-C(5)-H(5)      | 120.0      |
| C(10)-H(10)  | 0.9500   | N(1)-C(9)-C(4)      | 121.01(17) |
| C(6)-H(6)    | 0.9500   | N(1)-C(9)-C(8)      | 119.46(16) |

|                     |            |
|---------------------|------------|
| C(4)-C(9)-C(8)      | 119.53(17) |
| O(3)-C(13)-C(14)    | 107.18(16) |
| O(3)-C(13)-H(13A)   | 110.3      |
| O(3)-C(13)-H(13B)   | 110.3      |
| C(14)-C(13)-H(13A)  | 110.3      |
| C(14)-C(13)-H(13B)  | 110.3      |
| H(13A)-C(13)-H(13B) | 108.5      |
| O(3)-C(12)-C(11)    | 110.84(15) |
| O(2)-C(12)-O(3)     | 122.79(17) |
| O(2)-C(12)-C(11)    | 126.37(18) |
| O(1)-C(1)-H(1A)     | 109.5      |
| O(1)-C(1)-H(1B)     | 109.5      |
| O(1)-C(1)-H(1C)     | 109.5      |
| H(1A)-C(1)-H(1B)    | 109.5      |
| H(1A)-C(1)-H(1C)    | 109.5      |
| H(1B)-C(1)-H(1C)    | 109.5      |
| C(11)-C(10)-C(8)    | 125.93(17) |
| C(11)-C(10)-H(10)   | 117.0      |
| C(8)-C(10)-H(10)    | 117.0      |
| C(7)-C(6)-H(6)      | 119.8      |
| C(5)-C(6)-C(7)      | 120.32(19) |
| C(5)-C(6)-H(6)      | 119.8      |

Table S21. Anisotropic displacement parameters ( $\text{\AA}^2 \times 10^3$ ) for Yu83. The anisotropic displacement factor exponent takes the form:  $-2\pi^2 [ h^2 a^{*2} U^{11} + \dots + 2 h k a^* b^* U^{12} ]$

|       | U <sup>11</sup> | U <sup>22</sup> | U <sup>33</sup> | U <sup>23</sup> | U <sup>13</sup> | U <sup>12</sup> |
|-------|-----------------|-----------------|-----------------|-----------------|-----------------|-----------------|
| O(3)  | 46(1)           | 34(1)           | 40(1)           | -10(1)          | 16(1)           | -3(1)           |
| O(1)  | 45(1)           | 52(1)           | 45(1)           | 6(1)            | 13(1)           | -6(1)           |
| O(2)  | 59(1)           | 30(1)           | 56(1)           | 0(1)            | 20(1)           | -2(1)           |
| N(1)  | 29(1)           | 37(1)           | 29(1)           | 3(1)            | 1(1)            | 3(1)            |
| N(2)  | 38(1)           | 52(1)           | 36(1)           | -8(1)           | 4(1)            | 7(1)            |
| C(4)  | 31(1)           | 43(1)           | 30(1)           | -5(1)           | 0(1)            | 8(1)            |
| C(11) | 38(1)           | 31(1)           | 33(1)           | -2(1)           | 5(1)            | -2(1)           |
| C(14) | 56(1)           | 54(1)           | 38(1)           | -5(1)           | 11(1)           | 11(1)           |
| C(2)  | 29(1)           | 47(1)           | 33(1)           | 5(1)            | 2(1)            | 2(1)            |
| C(3)  | 35(1)           | 62(1)           | 34(1)           | -1(1)           | 10(1)           | 6(1)            |
| C(7)  | 42(1)           | 33(1)           | 33(1)           | 3(1)            | 5(1)            | 3(1)            |
| C(8)  | 32(1)           | 32(1)           | 28(1)           | 2(1)            | 1(1)            | 4(1)            |
| C(5)  | 42(1)           | 38(1)           | 43(1)           | -11(1)          | 1(1)            | 7(1)            |
| C(9)  | 28(1)           | 33(1)           | 28(1)           | 1(1)            | -2(1)           | 5(1)            |
| C(13) | 44(1)           | 37(1)           | 47(1)           | -16(1)          | 9(1)            | 2(1)            |
| C(12) | 32(1)           | 34(1)           | 31(1)           | 1(1)            | 3(1)            | 0(1)            |
| C(1)  | 61(2)           | 41(1)           | 60(1)           | 8(1)            | 12(1)           | -8(1)           |
| C(10) | 32(1)           | 29(1)           | 30(1)           | 2(1)            | 2(1)            | 2(1)            |
| C(6)  | 49(1)           | 30(1)           | 46(1)           | -2(1)           | 1(1)            | 1(1)            |

Table S22. Hydrogen coordinates ( $\times 10^4$ ) and isotropic displacement parameters ( $\text{\AA}^2 \times 10^{-3}$ ) for Yu83.

|        | x     | y    | z    | U(eq) |
|--------|-------|------|------|-------|
| H(11)  | 7612  | 6710 | 2754 | 40    |
| H(14A) | 12924 | 5542 | -892 | 74    |
| H(14B) | 13983 | 5990 | 25   | 74    |
| H(14C) | 11165 | 6073 | -854 | 74    |
| H(3)   | -3470 | 6617 | 8007 | 52    |
| H(7)   | 6549  | 7356 | 3861 | 44    |
| H(5)   | 1953  | 7932 | 6689 | 49    |
| H(13A) | 8649  | 5431 | 255  | 51    |
| H(13B) | 11467 | 5363 | 1153 | 51    |
| H(1A)  | -2197 | 5438 | 5287 | 81    |
| H(1B)  | -3027 | 5064 | 6402 | 81    |
| H(1C)  | 244   | 5278 | 6296 | 81    |
| H(10)  | 3910  | 6062 | 4041 | 37    |
| H(6)   | 5326  | 8040 | 5143 | 50    |



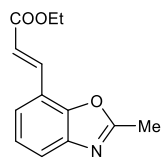

**5m**

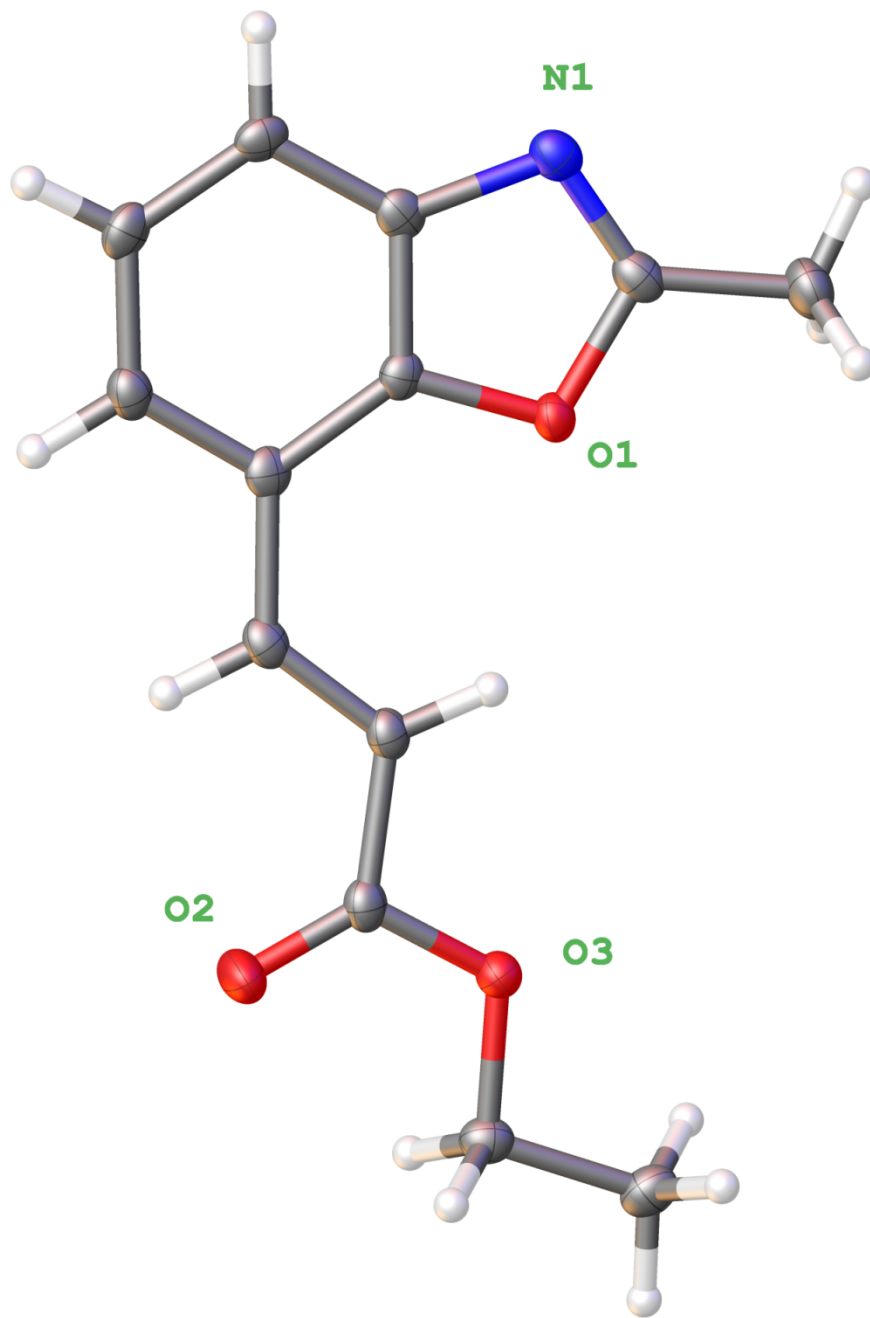

Table S23. Crystal data and structure refinement for Yu80.

|                                   |                                                  |                  |
|-----------------------------------|--------------------------------------------------|------------------|
| Report date                       | 2016-10-16                                       |                  |
| Identification code               | yu80_a                                           |                  |
| Empirical formula                 | C <sub>13</sub> H <sub>13</sub> N O <sub>3</sub> |                  |
| Molecular formula                 | C <sub>13</sub> H <sub>13</sub> N O <sub>3</sub> |                  |
| Formula weight                    | 231.24                                           |                  |
| Temperature                       | 100.0 K                                          |                  |
| Wavelength                        | 1.54178 Å                                        |                  |
| Crystal system                    | Monoclinic                                       |                  |
| Space group                       | P 1 21/n 1                                       |                  |
| Unit cell dimensions              | a = 7.3728(16) Å                                 | α = 90°.         |
|                                   | b = 21.871(4) Å                                  | β = 116.594(5)°. |
|                                   | c = 7.9223(17) Å                                 | γ = 90°.         |
| Volume                            | 1142.3(4) Å <sup>3</sup>                         |                  |
| Z                                 | 4                                                |                  |
| Density (calculated)              | 1.345 Mg/m <sup>3</sup>                          |                  |
| Absorption coefficient            | 0.792 mm <sup>-1</sup>                           |                  |
| F(000)                            | 488                                              |                  |
| Crystal size                      | 0.1 x 0.02 x 0.02 mm <sup>3</sup>                |                  |
| Crystal color, habit              | colorless needle                                 |                  |
| Theta range for data collection   | 4.042 to 66.596°.                                |                  |
| Index ranges                      | -7 ≤ h ≤ 8, -25 ≤ k ≤ 26, -8 ≤ l ≤ 9             |                  |
| Reflections collected             | 7761                                             |                  |
| Independent reflections           | 2016 [R(int) = 0.0572]                           |                  |
| Completeness to theta = 66.597°   | 99.4 %                                           |                  |
| Absorption correction             | Semi-empirical from equivalents                  |                  |
| Max. and min. transmission        | 0.5210 and 0.3801                                |                  |
| Refinement method                 | Full-matrix least-squares on F <sup>2</sup>      |                  |
| Data / restraints / parameters    | 2016 / 0 / 156                                   |                  |
| Goodness-of-fit on F <sup>2</sup> | 1.031                                            |                  |
| Final R indices [I > 2σ(I)]       | R1 = 0.0445, wR2 = 0.1067                        |                  |
| R indices (all data)              | R1 = 0.0682, wR2 = 0.1167                        |                  |
| Extinction coefficient            | n/a                                              |                  |
| Largest diff. peak and hole       | 0.179 and -0.242 e.Å <sup>-3</sup>               |                  |

Table S24. Atomic coordinates ( $\times 10^4$ ) and equivalent isotropic displacement parameters ( $\text{\AA}^2 \times 10^3$ ) for Yu80\_a.  $U(\text{eq})$  is defined as one third of the trace of the orthogonalized  $U^{ij}$  tensor.

|       | x       | y       | z       | $U(\text{eq})$ |
|-------|---------|---------|---------|----------------|
| O(1)  | 2209(2) | 4321(1) | 2588(2) | 18(1)          |
| O(2)  | 3070(3) | 5704(1) | 8578(2) | 30(1)          |
| O(3)  | 1372(2) | 6112(1) | 5685(2) | 19(1)          |
| N(1)  | 2750(3) | 3437(1) | 1410(2) | 21(1)          |
| C(1)  | 635(4)  | 4251(1) | -823(3) | 27(1)          |
| C(2)  | 1895(3) | 3964(1) | 1025(3) | 20(1)          |
| C(3)  | 3408(3) | 3961(1) | 4105(3) | 16(1)          |
| C(4)  | 3761(3) | 3416(1) | 3399(3) | 18(1)          |
| C(5)  | 4933(3) | 2959(1) | 4615(3) | 19(1)          |
| C(6)  | 5714(3) | 3077(1) | 6534(3) | 21(1)          |
| C(7)  | 5331(3) | 3628(1) | 7210(3) | 20(1)          |
| C(8)  | 4156(3) | 4094(1) | 6023(3) | 17(1)          |
| C(9)  | 3771(3) | 4656(1) | 6805(3) | 18(1)          |
| C(10) | 2646(3) | 5128(1) | 5857(3) | 18(1)          |
| C(11) | 2412(3) | 5664(1) | 6873(3) | 19(1)          |
| C(12) | 1220(3) | 6686(1) | 6537(3) | 20(1)          |
| C(13) | 35(3)   | 7118(1) | 4943(3) | 23(1)          |

Table S25. Bond lengths [Å] and angles [°] for Yu80\_a.

|                  |            |                   |            |
|------------------|------------|-------------------|------------|
| O(1)-C(2)        | 1.393(2)   | C(2)-N(1)-C(4)    | 104.65(17) |
| O(1)-C(3)        | 1.377(2)   | H(1A)-C(1)-H(1B)  | 109.5      |
| O(2)-C(11)       | 1.217(2)   | H(1A)-C(1)-H(1C)  | 109.5      |
| O(3)-C(11)       | 1.337(2)   | H(1B)-C(1)-H(1C)  | 109.5      |
| O(3)-C(12)       | 1.453(2)   | C(2)-C(1)-H(1A)   | 109.5      |
| N(1)-C(2)        | 1.285(3)   | C(2)-C(1)-H(1B)   | 109.5      |
| N(1)-C(4)        | 1.410(3)   | C(2)-C(1)-H(1C)   | 109.5      |
| C(1)-H(1A)       | 0.9800     | O(1)-C(2)-C(1)    | 115.09(18) |
| C(1)-H(1B)       | 0.9800     | N(1)-C(2)-O(1)    | 115.05(18) |
| C(1)-H(1C)       | 0.9800     | N(1)-C(2)-C(1)    | 129.86(19) |
| C(1)-C(2)        | 1.477(3)   | O(1)-C(3)-C(4)    | 107.61(16) |
| C(3)-C(4)        | 1.390(3)   | O(1)-C(3)-C(8)    | 128.12(18) |
| C(3)-C(8)        | 1.395(3)   | C(4)-C(3)-C(8)    | 124.27(19) |
| C(4)-C(5)        | 1.388(3)   | C(3)-C(4)-N(1)    | 108.72(18) |
| C(5)-H(5)        | 0.9500     | C(5)-C(4)-N(1)    | 130.74(19) |
| C(5)-C(6)        | 1.388(3)   | C(5)-C(4)-C(3)    | 120.53(18) |
| C(6)-H(6)        | 0.9500     | C(4)-C(5)-H(5)    | 121.6      |
| C(6)-C(7)        | 1.396(3)   | C(6)-C(5)-C(4)    | 116.74(19) |
| C(7)-H(7)        | 0.9500     | C(6)-C(5)-H(5)    | 121.6      |
| C(7)-C(8)        | 1.394(3)   | C(5)-C(6)-H(6)    | 119.2      |
| C(8)-C(9)        | 1.460(3)   | C(5)-C(6)-C(7)    | 121.7(2)   |
| C(9)-H(9)        | 0.9500     | C(7)-C(6)-H(6)    | 119.2      |
| C(9)-C(10)       | 1.328(3)   | C(6)-C(7)-H(7)    | 118.6      |
| C(10)-H(10)      | 0.9500     | C(8)-C(7)-C(6)    | 122.88(18) |
| C(10)-C(11)      | 1.474(3)   | C(8)-C(7)-H(7)    | 118.6      |
| C(12)-H(12A)     | 0.9900     | C(3)-C(8)-C(9)    | 125.46(18) |
| C(12)-H(12B)     | 0.9900     | C(7)-C(8)-C(3)    | 113.89(18) |
| C(12)-C(13)      | 1.505(3)   | C(7)-C(8)-C(9)    | 120.65(17) |
| C(13)-H(13A)     | 0.9800     | C(8)-C(9)-H(9)    | 116.3      |
| C(13)-H(13B)     | 0.9800     | C(10)-C(9)-C(8)   | 127.33(18) |
| C(13)-H(13C)     | 0.9800     | C(10)-C(9)-H(9)   | 116.3      |
|                  |            | C(9)-C(10)-H(10)  | 119.8      |
| C(3)-O(1)-C(2)   | 103.97(15) | C(9)-C(10)-C(11)  | 120.40(17) |
| C(11)-O(3)-C(12) | 116.47(15) | C(11)-C(10)-H(10) | 119.8      |

|                     |            |
|---------------------|------------|
| O(2)-C(11)-O(3)     | 123.13(19) |
| O(2)-C(11)-C(10)    | 125.23(19) |
| O(3)-C(11)-C(10)    | 111.64(16) |
| O(3)-C(12)-H(12A)   | 110.4      |
| O(3)-C(12)-H(12B)   | 110.4      |
| O(3)-C(12)-C(13)    | 106.81(16) |
| H(12A)-C(12)-H(12B) | 108.6      |
| C(13)-C(12)-H(12A)  | 110.4      |
| C(13)-C(12)-H(12B)  | 110.4      |
| C(12)-C(13)-H(13A)  | 109.5      |
| C(12)-C(13)-H(13B)  | 109.5      |
| C(12)-C(13)-H(13C)  | 109.5      |
| H(13A)-C(13)-H(13B) | 109.5      |
| H(13A)-C(13)-H(13C) | 109.5      |
| H(13B)-C(13)-H(13C) | 109.5      |

Table S26. Anisotropic displacement parameters ( $\text{\AA}^2 \times 10^3$ ) for Yu80\_a. The anisotropic displacement factor exponent takes the form:  $-2\pi^2 [ h^2 a^{*2} U^{11} + \dots + 2 h k a^* b^* U^{12} ]$

|       | U <sup>11</sup> | U <sup>22</sup> | U <sup>33</sup> | U <sup>23</sup> | U <sup>13</sup> | U <sup>12</sup> |
|-------|-----------------|-----------------|-----------------|-----------------|-----------------|-----------------|
| O(1)  | 15(1)           | 21(1)           | 14(1)           | 0(1)            | 4(1)            | 0(1)            |
| O(2)  | 40(1)           | 29(1)           | 16(1)           | -2(1)           | 7(1)            | 8(1)            |
| O(3)  | 20(1)           | 19(1)           | 16(1)           | -1(1)           | 6(1)            | 2(1)            |
| N(1)  | 18(1)           | 25(1)           | 20(1)           | -3(1)           | 10(1)           | -2(1)           |
| C(1)  | 29(1)           | 33(1)           | 17(1)           | 1(1)            | 8(1)            | 1(1)            |
| C(2)  | 18(1)           | 24(1)           | 18(1)           | -4(1)           | 9(1)            | -5(1)           |
| C(3)  | 11(1)           | 19(1)           | 18(1)           | 1(1)            | 6(1)            | -1(1)           |
| C(4)  | 11(1)           | 24(1)           | 19(1)           | -2(1)           | 7(1)            | -2(1)           |
| C(5)  | 13(1)           | 19(1)           | 25(1)           | -1(1)           | 9(1)            | 1(1)            |
| C(6)  | 12(1)           | 24(1)           | 24(1)           | 4(1)            | 6(1)            | 1(1)            |
| C(7)  | 16(1)           | 26(1)           | 16(1)           | 0(1)            | 6(1)            | -1(1)           |
| C(8)  | 11(1)           | 20(1)           | 18(1)           | -1(1)           | 5(1)            | -3(1)           |
| C(9)  | 15(1)           | 22(1)           | 16(1)           | -3(1)           | 6(1)            | -4(1)           |
| C(10) | 14(1)           | 22(1)           | 15(1)           | 0(1)            | 5(1)            | -2(1)           |
| C(11) | 14(1)           | 23(1)           | 16(1)           | 1(1)            | 5(1)            | -1(1)           |
| C(12) | 19(1)           | 20(1)           | 23(1)           | -3(1)           | 11(1)           | -1(1)           |
| C(13) | 21(1)           | 23(1)           | 28(1)           | 2(1)            | 13(1)           | 3(1)            |

Table S27. Hydrogen coordinates ( $\times 10^4$ ) and isotropic displacement parameters ( $\text{\AA}^2 \times 10^{-3}$ ) for Yu80\_a.

|        | x     | y    | z     | U(eq) |
|--------|-------|------|-------|-------|
| H(1A)  | -714  | 4341 | -928  | 40    |
| H(1B)  | 505   | 3971 | -1836 | 40    |
| H(1C)  | 1277  | 4631 | -932  | 40    |
| H(5)   | 5188  | 2584 | 4157  | 23    |
| H(6)   | 6530  | 2777 | 7410  | 25    |
| H(7)   | 5897  | 3687 | 8536  | 24    |
| H(9)   | 4397  | 4687 | 8142  | 22    |
| H(10)  | 1988  | 5121 | 4516  | 21    |
| H(12A) | 2587  | 6853 | 7338  | 24    |
| H(12B) | 513   | 6623 | 7332  | 24    |
| H(13A) | 690   | 7149 | 4108  | 35    |
| H(13B) | -5    | 7523 | 5455  | 35    |
| H(13C) | -1351 | 6964 | 4226  | 35    |

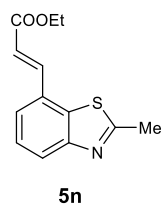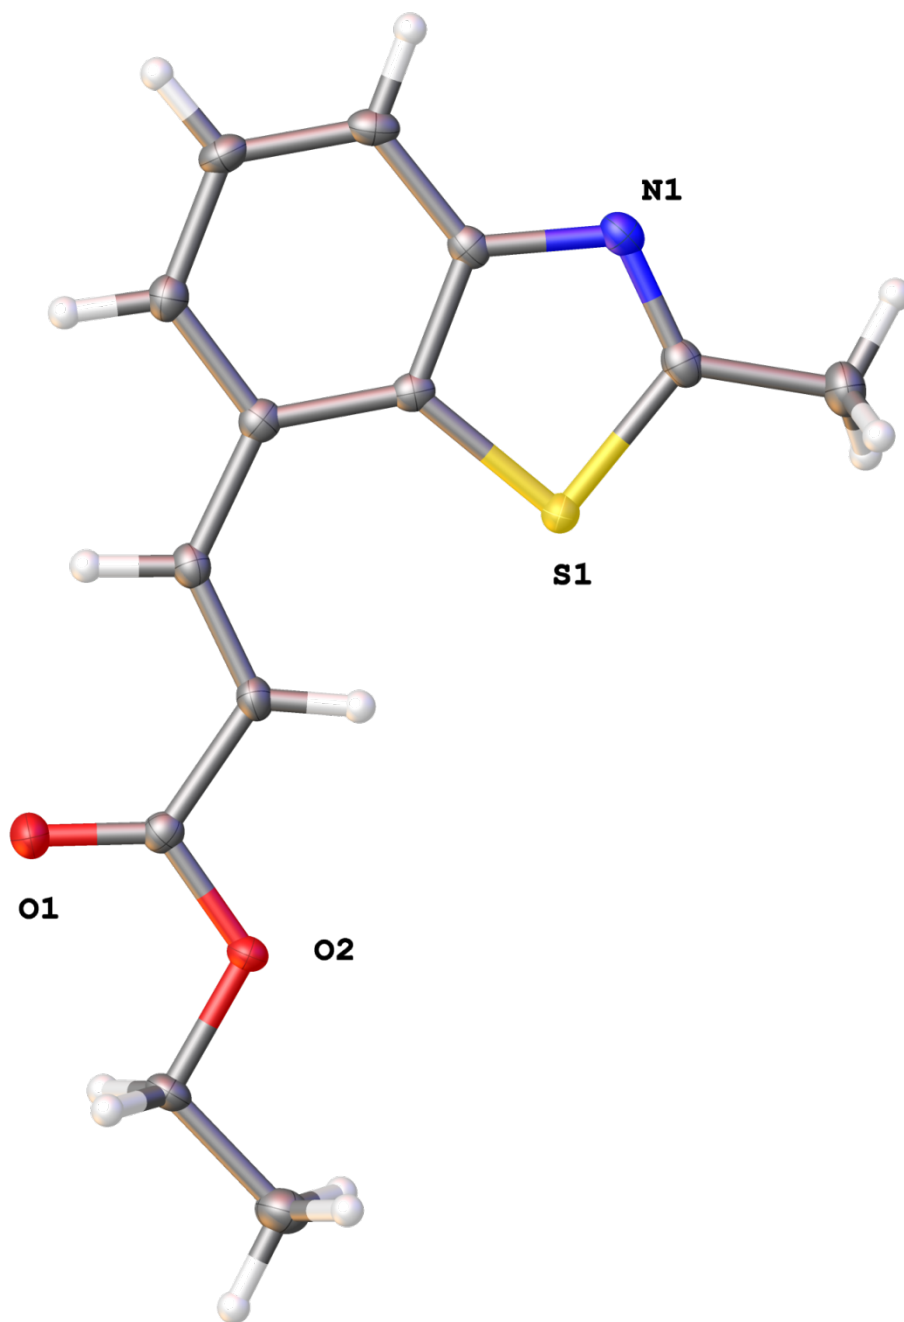



Table S28. Crystal data and structure refinement for Yu82.

|                                   |                                                    |                 |
|-----------------------------------|----------------------------------------------------|-----------------|
| Report date                       | 2016-11-09                                         |                 |
| Identification code               | yu82                                               |                 |
| Empirical formula                 | C <sub>13</sub> H <sub>13</sub> N O <sub>2</sub> S |                 |
| Molecular formula                 | C <sub>13</sub> H <sub>13</sub> N O <sub>2</sub> S |                 |
| Formula weight                    | 247.30                                             |                 |
| Temperature                       | 100.0 K                                            |                 |
| Wavelength                        | 0.71073 Å                                          |                 |
| Crystal system                    | Triclinic                                          |                 |
| Space group                       | P-1                                                |                 |
| Unit cell dimensions              | a = 7.3791(8) Å                                    | α = 71.415(3)°. |
|                                   | b = 7.9026(8) Å                                    | β = 79.346(3)°. |
|                                   | c = 11.8080(12) Å                                  | γ = 66.702(3)°. |
| Volume                            | 598.08(11) Å <sup>3</sup>                          |                 |
| Z                                 | 2                                                  |                 |
| Density (calculated)              | 1.373 Mg/m <sup>3</sup>                            |                 |
| Absorption coefficient            | 0.259 mm <sup>-1</sup>                             |                 |
| F(000)                            | 260                                                |                 |
| Crystal size                      | 0.25 x 0.2 x 0.08 mm <sup>3</sup>                  |                 |
| Crystal color, habit              | colorless plate                                    |                 |
| Theta range for data collection   | 1.824 to 25.364°.                                  |                 |
| Index ranges                      | -8 ≤ h ≤ 8, -6 ≤ k ≤ 9, -12 ≤ l ≤ 14               |                 |
| Reflections collected             | 6836                                               |                 |
| Independent reflections           | 2194 [R(int) = 0.0403]                             |                 |
| Completeness to theta = 25.242°   | 99.9 %                                             |                 |
| Absorption correction             | Semi-empirical from equivalents                    |                 |
| Max. and min. transmission        | 0.5619 and 0.5134                                  |                 |
| Refinement method                 | Full-matrix least-squares on F <sup>2</sup>        |                 |
| Data / restraints / parameters    | 2194 / 0 / 156                                     |                 |
| Goodness-of-fit on F <sup>2</sup> | 1.052                                              |                 |
| Final R indices [I > 2σ(I)]       | R1 = 0.0336, wR2 = 0.0785                          |                 |
| R indices (all data)              | R1 = 0.0422, wR2 = 0.0839                          |                 |
| Extinction coefficient            | n/a                                                |                 |
| Largest diff. peak and hole       | 0.257 and -0.245 e.Å <sup>-3</sup>                 |                 |

Table S29. Atomic coordinates ( $\times 10^4$ ) and equivalent isotropic displacement parameters ( $\text{\AA}^2 \times 10^3$ ) for Yu82.  $U(\text{eq})$  is defined as one third of the trace of the orthogonalized  $U^{ij}$  tensor.

|       | x       | y        | z       | $U(\text{eq})$ |
|-------|---------|----------|---------|----------------|
| S(1)  | 1934(1) | 8359(1)  | 3857(1) | 16(1)          |
| O(1)  | 3399(2) | 664(2)   | 6446(1) | 23(1)          |
| O(2)  | 1450(2) | 3031(2)  | 7277(1) | 17(1)          |
| N(1)  | 3044(2) | 10013(2) | 1723(1) | 18(1)          |
| C(1)  | 894(3)  | 12327(3) | 2844(2) | 24(1)          |
| C(2)  | 2006(3) | 10369(2) | 2688(2) | 17(1)          |
| C(3)  | 3441(2) | 6887(2)  | 2970(1) | 14(1)          |
| C(4)  | 3878(2) | 8045(2)  | 1856(2) | 15(1)          |
| C(5)  | 5082(2) | 7217(3)  | 967(2)  | 18(1)          |
| C(6)  | 5828(3) | 5247(3)  | 1208(2) | 18(1)          |
| C(7)  | 5387(2) | 4097(3)  | 2310(2) | 18(1)          |
| C(8)  | 4193(2) | 4870(2)  | 3221(2) | 15(1)          |
| C(9)  | 3842(2) | 3541(2)  | 4344(2) | 16(1)          |
| C(10) | 2718(2) | 3926(2)  | 5323(1) | 16(1)          |
| C(11) | 2593(2) | 2348(2)  | 6376(2) | 15(1)          |
| C(12) | 1250(3) | 1595(3)  | 8374(2) | 18(1)          |
| C(13) | -51(3)  | 2655(3)  | 9249(2) | 24(1)          |

Table S30. Bond lengths [Å] and angles [°] for Yu82.

|                  |            |                     |            |
|------------------|------------|---------------------|------------|
| S(1)-C(2)        | 1.7533(18) | N(1)-C(4)-C(3)      | 115.59(14) |
| S(1)-C(3)        | 1.7346(16) | N(1)-C(4)-C(5)      | 123.96(15) |
| O(1)-C(11)       | 1.206(2)   | C(5)-C(4)-C(3)      | 120.45(16) |
| O(2)-C(11)       | 1.3439(19) | C(4)-C(5)-H(5)      | 120.8      |
| O(2)-C(12)       | 1.454(2)   | C(6)-C(5)-C(4)      | 118.50(16) |
| N(1)-C(2)        | 1.294(2)   | C(6)-C(5)-H(5)      | 120.8      |
| N(1)-C(4)        | 1.395(2)   | C(5)-C(6)-H(6)      | 119.4      |
| C(1)-H(1A)       | 0.9800     | C(5)-C(6)-C(7)      | 121.15(15) |
| C(1)-H(1B)       | 0.9800     | C(7)-C(6)-H(6)      | 119.4      |
| C(1)-H(1C)       | 0.9800     | C(6)-C(7)-H(7)      | 119.0      |
| C(1)-C(2)        | 1.491(2)   | C(6)-C(7)-C(8)      | 122.04(16) |
| C(3)-C(4)        | 1.408(2)   | C(8)-C(7)-H(7)      | 119.0      |
| C(3)-C(8)        | 1.413(2)   | C(3)-C(8)-C(9)      | 125.80(15) |
| C(4)-C(5)        | 1.397(2)   | C(7)-C(8)-C(3)      | 116.51(16) |
| C(5)-H(5)        | 0.9500     | C(7)-C(8)-C(9)      | 117.69(16) |
| C(5)-C(6)        | 1.381(3)   | C(8)-C(9)-H(9)      | 115.6      |
| C(6)-H(6)        | 0.9500     | C(10)-C(9)-C(8)     | 128.89(16) |
| C(6)-C(7)        | 1.396(2)   | C(10)-C(9)-H(9)     | 115.6      |
| C(7)-H(7)        | 0.9500     | C(9)-C(10)-H(10)    | 120.0      |
| C(7)-C(8)        | 1.397(2)   | C(9)-C(10)-C(11)    | 120.00(15) |
| C(8)-C(9)        | 1.459(2)   | C(11)-C(10)-H(10)   | 120.0      |
| C(9)-H(9)        | 0.9500     | O(1)-C(11)-O(2)     | 123.49(15) |
| C(9)-C(10)       | 1.336(2)   | O(1)-C(11)-C(10)    | 125.68(15) |
| C(10)-H(10)      | 0.9500     | O(2)-C(11)-C(10)    | 110.83(14) |
| C(10)-C(11)      | 1.473(2)   | O(2)-C(12)-H(12A)   | 110.4      |
| C(12)-H(12A)     | 0.9900     | O(2)-C(12)-H(12B)   | 110.4      |
| C(12)-H(12B)     | 0.9900     | O(2)-C(12)-C(13)    | 106.71(14) |
| C(12)-C(13)      | 1.497(2)   | H(12A)-C(12)-H(12B) | 108.6      |
| C(13)-H(13A)     | 0.9800     | C(13)-C(12)-H(12A)  | 110.4      |
| C(13)-H(13B)     | 0.9800     | C(13)-C(12)-H(12B)  | 110.4      |
| C(13)-H(13C)     | 0.9800     | C(12)-C(13)-H(13A)  | 109.5      |
|                  |            | C(12)-C(13)-H(13B)  | 109.5      |
| C(3)-S(1)-C(2)   | 89.62(8)   | C(12)-C(13)-H(13C)  | 109.5      |
| C(11)-O(2)-C(12) | 115.62(13) | H(13A)-C(13)-H(13B) | 109.5      |
| C(2)-N(1)-C(4)   | 110.56(14) | H(13A)-C(13)-H(13C) | 109.5      |
| H(1A)-C(1)-H(1B) | 109.5      | H(13B)-C(13)-H(13C) | 109.5      |
| H(1A)-C(1)-H(1C) | 109.5      |                     |            |
| H(1B)-C(1)-H(1C) | 109.5      |                     |            |
| C(2)-C(1)-H(1A)  | 109.5      |                     |            |
| C(2)-C(1)-H(1B)  | 109.5      |                     |            |
| C(2)-C(1)-H(1C)  | 109.5      |                     |            |
| N(1)-C(2)-S(1)   | 115.68(13) |                     |            |
| N(1)-C(2)-C(1)   | 124.49(16) |                     |            |
| C(1)-C(2)-S(1)   | 119.83(13) |                     |            |
| C(4)-C(3)-S(1)   | 108.55(12) |                     |            |
| C(4)-C(3)-C(8)   | 121.35(15) |                     |            |
| C(8)-C(3)-S(1)   | 130.10(13) |                     |            |

Table S31. Anisotropic displacement parameters ( $\text{\AA}^2 \times 10^3$ ) for Yu82. The anisotropic displacement factor exponent takes the form:  $-2\pi^2 [ h^2 a^{*2} U^{11} + \dots + 2 h k a^* b^* U^{12} ]$

|       | U <sup>11</sup> | U <sup>22</sup> | U <sup>33</sup> | U <sup>23</sup> | U <sup>13</sup> | U <sup>12</sup> |
|-------|-----------------|-----------------|-----------------|-----------------|-----------------|-----------------|
| S(1)  | 18(1)           | 13(1)           | 15(1)           | -4(1)           | 1(1)            | -4(1)           |
| O(1)  | 29(1)           | 14(1)           | 21(1)           | -4(1)           | 3(1)            | -5(1)           |
| O(2)  | 21(1)           | 14(1)           | 13(1)           | -2(1)           | 2(1)            | -6(1)           |
| N(1)  | 18(1)           | 16(1)           | 18(1)           | -2(1)           | -2(1)           | -7(1)           |
| C(1)  | 27(1)           | 16(1)           | 28(1)           | -6(1)           | -2(1)           | -7(1)           |
| C(2)  | 18(1)           | 15(1)           | 19(1)           | -3(1)           | -5(1)           | -6(1)           |
| C(3)  | 12(1)           | 17(1)           | 13(1)           | -4(1)           | -2(1)           | -6(1)           |
| C(4)  | 14(1)           | 15(1)           | 16(1)           | -2(1)           | -4(1)           | -7(1)           |
| C(5)  | 17(1)           | 24(1)           | 12(1)           | -2(1)           | -1(1)           | -10(1)          |
| C(6)  | 18(1)           | 23(1)           | 16(1)           | -9(1)           | 3(1)            | -8(1)           |
| C(7)  | 16(1)           | 16(1)           | 20(1)           | -6(1)           | -2(1)           | -4(1)           |
| C(8)  | 14(1)           | 17(1)           | 16(1)           | -5(1)           | -3(1)           | -5(1)           |
| C(9)  | 17(1)           | 14(1)           | 17(1)           | -4(1)           | -3(1)           | -5(1)           |
| C(10) | 17(1)           | 12(1)           | 18(1)           | -3(1)           | -2(1)           | -4(1)           |
| C(11) | 14(1)           | 16(1)           | 16(1)           | -5(1)           | -1(1)           | -6(1)           |
| C(12) | 22(1)           | 16(1)           | 14(1)           | 1(1)            | 0(1)            | -9(1)           |
| C(13) | 27(1)           | 25(1)           | 20(1)           | -4(1)           | 2(1)            | -12(1)          |

Table S32. Hydrogen coordinates ( $\times 10^4$ ) and isotropic displacement parameters ( $\text{\AA}^2 \times 10^3$ ) for Yu82.

|        | x     | y     | z     | U(eq) |
|--------|-------|-------|-------|-------|
| H(1A)  | -528  | 12620 | 2857  | 36    |
| H(1B)  | 1278  | 13265 | 2178  | 36    |
| H(1C)  | 1203  | 12383 | 3601  | 36    |
| H(5)   | 5380  | 7993  | 213   | 21    |
| H(6)   | 6656  | 4663  | 614   | 22    |
| H(7)   | 5916  | 2746  | 2444  | 21    |
| H(9)   | 4503  | 2221  | 4385  | 19    |
| H(10)  | 1999  | 5216  | 5339  | 19    |
| H(12A) | 2562  | 772   | 8691  | 21    |
| H(12B) | 647   | 776   | 8223  | 21    |
| H(13A) | -1333 | 3483  | 8917  | 37    |
| H(13B) | 576   | 3441  | 9402  | 37    |
| H(13C) | -247  | 1738  | 10001 | 37    |

## 11. References

1. Ye, M. *et al.* Ligand-promoted C3-selective arylation of pyridines with Pd catalysts: gram-scale synthesis of (±)-Preclamol. *J. Am. Chem. Soc.* **133**, 19090–19093 (2011).
2. Kudo, N., Perseghini, M. & Fu, G. C. A versatile method for Suzuki cross-coupling reactions of nitrogen heterocycles. *Angew. Chem. Int. Ed.* **45**, 1282–1284 (2006).
3. Gran, U., Wennerström, O. & Westman, G. Stereoselective reductions with macrocyclic NADH models. *Tetrahedron: Asymmetry* **11**, 3027–3040 (2000).
4. Rudolf, S., Goebel, W. & Neumann, W. Reactions of pyridine-3-sulfonyl chloride with amines. *Acta Chim. Acad. Sci. Hung.* **64**, 267–271 (1970).
5. Thelemann, J. *et al.* Aryl bis-sulfonamide inhibitors of IspF from *Arabidopsis thaliana* and *Plasmodium falciparum*. *ChemMedChem* **10**, 2090–2098 (2015).
6. Planas, O., Whiteoak, C. J., Company, A. & Ribas, X. Regioselective access to sultam motifs through cobalt-catalyzed annulation of aryl sulfonamides and alkynes using an 8-aminoquinoline directing group. *Adv. Synth. Catal.* **357**, 4003–4012 (2015).
7. Royo, E., Betancort, J. M., Davis, T. J., Carroll, P. & Walsh, P. J. Synthesis, structure, and catalytic properties of bis[bis(sulfonamido)] titanium complexes. *Organometallics* **19**, 4840–4851 (2000).
8. Chen, L. *et al.* Structure-based design of 3-carboxy-substituted 1,2,3,4-tetrahydroquinolines as inhibitors of myeloid cell leukemia-1 (Mcl-1). *Org. Biomol. Chem.* **14**, 5505–5510 (2016).
9. McNab, H. <sup>13</sup>C Nuclear Magnetic Resonance Spectra of Quinoxaline Derivatives. *J. Chem. Soc., Perkin Trans.* **1**, 357–363 (1982).
10. Kimura, H., Torikai, K. & Ueda, I. Thermal Cyclization of Nonconjugated Aryl-Yne-Carbodiimide Furnishing a Dibenzonaphthyridine Derivative. *Chem. Pharm. Bull.* **57**, 393–396 (2009).
11. Thansandote, P., Hulcoop, D. G., Langer, M. & Lautens, M. Palladium-Catalyzed Annulation of Haloanilines and Halobenzamides Using Norbornadiene as an Acetylene Synthon: A Route to Functionalized Indolines, Isoquinolinones, and Indoles. *J. Org. Chem.* **74**, 1673–1678 (2009).
12. Ong, W. Q. *et al.* Computational prediction and experimental verification of pyridine-based helical oligoamides containing four repeating units per helical turn. *Chem. Commun.* **47**, 6416–6418 (2011).
